# Supplementary material for: Whole genome sequencing and analysis of 4,053 individuals in trios and mother-infant duos from the Born in Guangzhou Cohort Study
Source: Research Square preprint supplement (doi:10.21203/rs.3.rs-1732885/v1), 2022-06-10

North China

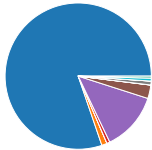

Northeast China

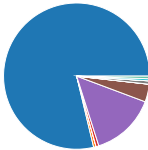

Northwest China

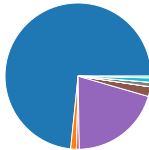

Central China

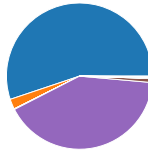

East China

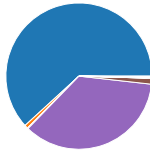

Southwest China

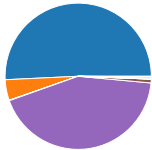

South China

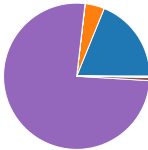

CHS

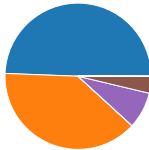

CHB

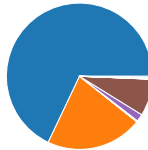

CDX

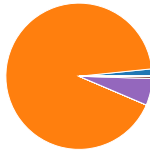

Supplement: Supplementary file 1 [file 401da8f85f9e1ce98d7a1784.pdf]
