# Supplementary material for: Whole genome sequencing and analysis of 4,053 individuals in trios and mother-infant duos from the Born in Guangzhou Cohort Study
Source: Research Square preprint supplement (doi:10.21203/rs.3.rs-1732885/v1), 2022-06-10
Supplement: Supplementary file 2 [file 0d52e2c43513b06a198cad7c.xlsx]

## Sheet: Sheet1
Table S5. List of traits with significant associated variants in GWAS. Related to Figure 3
											Discovery					Adult genotype versus Infant Effect and vice versa					Replication
Group	Trait	Chromosome	Position	rsID*	REF (Reference allele)	ALT (Effect allele)	AF	HGVSc	Gene symbol	Coding effect	Sample size	Beta	SE	P	GWAS catalog mapped genes	Sample size	AF	BETA	SE	P	AF	BETA	SE	P
Adult/Mother	Gestational weight gain (GWG) rate	chr22	27994901	rs3840091	CCAGA	C	0.121798	c.5244+1230_5244+1233del	TTC28	Intronic	1571	0.332141	0.0539171	7.2646e-10	NOVEL	Data not available					Replication data not available
	OGTT 0H	chr2	168907981	rs2232326	T	C	0.0526901	c.970T>C	G6PC2	Missense	1689	-0.460867	0.076941	2.10005e-09	NR&SPC25,SPC25,G6PC2&SPC25,SPC25,G6PC2,ABCC11&SPC25,SPC25,SPC25,G6PC2&SPC25,SPC25,G6PC2&SPC25,SPC25,G6PC2,G6PC2,NR&SPC25,SPC25,G6PC2,G6PC2,G6PC2&G6PC2,G6PC2,SPC25,SPC25,G6PC2,ABCB11&ABCB11,ABCB11,NR&ABCB11,ABCB11,ABCB11&ABCB11,ABCB11	Data not available					Replication data not available
		chr11	92975544	rs10830963	C	G	0.431002	c.223+5596C>G	MTNR1B	Intronic	1689	0.23723	0.0351042	1.40016e-11	MTNR1B&AP003171.2-SNRPGP16,NR&AP003171.2-SNRPGP16,MTNR1B&SNRPGP16-AP003171.1,NR&SNRPGP16-AP003171.1,MTNR1B&MTNR1B,FAT3,MTNR1B&MTNR1B,NR&MTNR1B	Data not available					0.44534	0.169838	0.0123721	1.0697e-42
	OGTT 1H	chr11	92975544	rs10830963	C	G	0.430124	c.223+5596C>G	MTNR1B	Intronic	1692	0.255555	0.0351192	3.41807e-13	NOVEL	Data not available					0.44534	0.214191	0.0121386	3.50496e-69
	Total cholesterol (TC)	chr1	109278685	rs583104	G	T	0.934008	NA	CELSR2	Downstream	1540	0.416404	0.0674635	6.73093e-10	NR&SARS1,PSRC1&CELSR2,CELSR2&CELSR2,NR&CELSR2,CELSR2,SORT1&CELSR2,SORT1&CELSR2,CELSR2,PSRC1,SORT1&CELSR2,&CELSR2,CELSR2&CELSR2-PSRC1,CELSR2,PSRC1,SORT1&CELSR2-PSRC1,PSRC1,CELSR2,SORT1&CELSR2-PSRC1,NR&CELSR2-PSRC1,CELSR2,SORT1&CELSR2-PSRC1,PSRC1&CELSR2-PSRC1,&CELSR2-PSRC1,SORT1&CELSR2-PSRC1,CELSR2,PSRC1&CELSR2-PSRC1,PSRC1,CELSR2&CELSR2-PSRC1,PSRC1&PSRC1	1464	0.93699	0.197179	0.0755001	0.00901083	0.93512	0.503978	0.0292497	4.44608e-66
		chr19	44911142	rs72654473	C	A	0.0894666	n.1768C>A	APOE	Non-coding transcript exon	1540	-0.482201	0.0591965	3.76852e-16	NR&NECTIN2,APOE&NECTIN2,APOE,PVRL2,TOMM40&NECTIN2,&NECTIN2,NECTIN2&NECTIN2,APOE&AC011481.2,NECTIN2,APOE,APOC1,APOC2&NECTIN2,AC011481.2,NR&NECTIN2,AC011481.2,&NECTIN2,AC011481.2,APOC1&AC011481.2,NECTIN2,PVRL2&AC011481.2,NECTIN2,APOE,TOMM40&TOMM40,APOcluster&TOMM40,NR&TOMM40,APOE&TOMM40,APOE&TOMM40-APOE,APOC1&TOMM40-APOE,APOE&APOE,NR&APOE,APOC1&APOE,APOC2,APOE,APOC1&APOE,APOC1,APOC2,APOE&APOE,APOE,…	1464	0.095015	-0.0968258	0.0630097	0.124371	0.0819	-0.462835	0.0266036	2.53276e-67
	High-density lipoprotein (HDL)	chr19	44923535	rs141622900	G	A	0.0818904	NA	APOC1-APOC1P1	Upstream	1537	0.4215	0.0656577	1.36583e-10	APOC1,APOC1P1,APOC2,APOC4,APOC4-APOC2,APOE,BCAM,BCL3,BLOC1S3,CBLC,CEACAM16,CEACAM19,CEACAM22P,CLASRP,CLPTM1,EXOC3L2,GEMIN7,IGSF23,MIR4531,MIR8085,NKPD1,PPP1R37,PVR,PVRL2,RELB,TOMM40,TRAPPC6A,ZNF296&NECTIN2,APOC1,APOC1P1,APOC2,APOC4,APOC4-APOC2,APOE,BCAM,BCL3,CBLC,CLPTM1,MIR8085,PVRL2,RELB,TOMM40&NECTIN2,APOC1&AC011481.2,NECTIN2,APOE,TOMM40&TOMM40,TOMM40&TOMM40,APOC1,APOC1P1,APOC2,APOC4,APOC4-APOC…	1463	0.0890383	0.340518	0.0651597	1.73306e-07	Replication data not available
	Low-density lipoprotein (LDL)	chr1	109272630	rs611917	A	G	0.0524112	n.1971A>G	CELSR2	Non-coding transcript exon	1537	-0.594849	0.0781259	2.65783e-14	PSRC1&CELSR2,CELSR2&CELSR2,NR&CELSR2,SORT1&CELSR2,CELSR2,PSRC1,SORT1&CELSR2,&CELSR2,CELSR2&CELSR2-PSRC1,CELSR2,PSRC1,SORT1&CELSR2-PSRC1,PSRC1,CELSR2,SORT1&CELSR2-PSRC1,CELSR2,SORT1&CELSR2-PSRC1,&CELSR2-PSRC1,PSRC1&CELSR2-PSRC1,CELSR2,PSRC1&CELSR2-PSRC1,PSRC1,CELSR2&CELSR2-PSRC1,SORT1&CELSR2-PSRC1,PSRC1&PSRC1	1462	0.0487479	-0.143745	0.0855002	0.0927204	Replication data not available
		chr19	44911142	rs72654473	C	A	0.0896412	n.1768C>A	APOE	Non-coding transcript exon	1537	-0.797744	0.0605928	1.38304e-39	APOE&NECTIN2,&NECTIN2,NR&NECTIN2,APOE&AC011481.2,NECTIN2,&NECTIN2,AC011481.2,PVRL2&AC011481.2,NECTIN2,APOE,TOMM40&TOMM40,APOcluster&TOMM40,TOMM40&TOMM40,APOE&TOMM40,APOE&APOE,APOC1,APOE,APOC2&APOE,&APOE,APOE&AC011481.3,APOC1&AC011481.3,APOE,APOC1,APOC2&AC011481.3,APOE&APOC1-APOC1P1,APOC2,APOE,APOC4,APOC1&APOC1-APOC1P1,APOC1&APOC1-APOC1P1,APOE,APOC4,APOC1&APOC1-APOC1P1,APOC2,APOE,APOC1&APOC1-APOC1…	1462	0.0970452	-0.705529	0.061749	3.10934e-30	Replication data not available
	Triglycerides (TG)	chr11	116792991	rs662799	G	A	0.734902	NA	APOA5	Upstream	1536	-0.460009	0.0385124	6.94149e-33	NR&LINC02702-BUD13,ZNF259,APOA1,APOC3,APOA4,APOA5,BUD13&BUD13,NR&BUD13,BUD13&BUD13,APOA1,APOC3,APOA4,APOA5&BUD13,&BUD13,NR&ZPR1,A4,C3,A1,APOA5&ZPR1,&ZPR1,APOA1,APOC3,APOA4,APOA5&ZPR1,ZNF259,BUD13&ZPR1,APOC,APOA&ZPR1,ZPR1,APOA1,APOA4,APOA5,APOC3&ZPR1,APOA1&ZPR1,APOA5&ZPR1,ZNF259,APOA1,APOC3,APOA4,APOA5,BUD13,KIAA0999&ZPR1,ZPR1&ZPR1,ZNF259&ZPR1,ZNF259,APOA5&ZPR1,APO-cluster&ZPR1,LOC101929011&ZPR1,A…	1449	0.728848	0.0889951	0.0431007	0.0389401	0.72895	-0.368759	0.0134124	1.72626e-163
	Total Bile Acid (TBA)	chr14	69778476	rs2296651	G	A	0.079407	c.800C>T	SLC10A1	Missense	1701	0.890201	0.0674209	8.36005e-40	NOVEL	Data not available					0.08223	0.467137	0.071176	5.3689e-11
Infant	High-density lipoprotein (HDL)	chr19	44908822	rs7412	C	T	0.0863787	c.526C>T	APOE	Missense	1463	0.426736	0.0662344	1.17274e-10	NOVEL	1537	0.0798705	0.426589	0.0667203	1.61939e-10	Associated with adult HDL level in GWAS catalog and in BIGCS
	Low-density lipoprotein (LDL)	chr12	53111052	rs137994041	A	AGTTT	0.13105	c.444-4337_444-4334dup	SOAT2	Intronic	1462	0.338308	0.0557193	1.26606e-09	NOVEL	1537	0.13572	-0.00238227	0.0527997	0.964012	Replication data not available
		chr19	44911142	rs72654473	C	A	0.0970452	n.1768C>A	APOE	Non-coding transcript exon	1462	-0.705529	0.061749	3.10934e-30	NOVEL	1537	0.0896412	-0.797744	0.0605928	1.38304e-39	Associated with adult LDL level in GWAS catalog and in BIGCS
	Triglycerides (TG)	chr8	19965299	rs11570891	C	T	0.107126	c.*-11C>T	LPL	Intronic	1449	-0.355652	0.0644376	3.40301e-08	NOVEL	1536	0.104916	-0.223468	0.0568359	8.43063e-05	Associated with adult TG level in GWAS catalog and in BIGCS
*The lead variant
