# Supplementary material for: Whole genome sequencing and analysis of 4,053 individuals in trios and mother-infant duos from the Born in Guangzhou Cohort Study
Source: Research Square preprint supplement (doi:10.21203/rs.3.rs-1732885/v1), 2022-06-10
Supplement: Supplementary file 3 [file 12a94c40c342a99762c07bd2.xlsx]

## Sheet: Sheet1
Table S13. GWAS SNPs used to calculate the PRS for total cholesterol (POS: GRCh38 coordinate; A: Effect allele)
SNP	CHR	POS	A	B	Beta	SE	P value	ALT allele frequency	REF	ALT
rs7528419	chr1	109274570	G	A	-0.512585	0.0297254	1.24128e-66	0.05342	A	G
rs61830267	chr1	220800547	T	C	0.0748842	0.0125618	2.50295e-09	0.33691	C	T
rs1855829	chr1	220845490	T	G	-0.112186	0.0144851	9.5639e-15	0.27581	G	T
rs145036923	chr5	156943987	A	G	-0.0745116	0.0127955	5.77086e-09	0.26043	G	A
rs4704826	chr5	156965071	C	A	-0.0724111	0.0126263	9.75456e-09	0.64377	C	A
rs78841457	chr6	151653357	A	G	0.0703655	0.0122111	8.29158e-09	0.39684	G	A
rs6997473	chr8	58493664	G	A	-0.0983932	0.0139067	1.49193e-12	0.24769	A	G
rs1883025	chr9	104902020	T	C	-0.0866257	0.0144	1.7914e-09	0.21744	C	T
rs7896850	chr10	72432980	C	T	-0.0823124	0.0147265	2.27847e-08	0.19814	T	C
rs2792744	chr10	112142660	C	A	0.0788234	0.013524	5.59584e-09	0.24763	A	C
rs7897127	chr10	112258898	A	G	-0.0686697	0.0108761	2.72237e-10	0.38772	G	A
rs174559	chr11	61814184	G	A	0.0928569	0.0112054	1.16337e-16	0.52343	G	A
rs1169301	chr12	120993497	T	C	0.0791991	0.0107804	2.03338e-13	0.47719	C	T
rs7400121	chr13	113853604	G	A	0.0948799	0.0129036	1.93837e-13	0.30703	A	G
rs588136	chr15	58438299	C	T	0.106164	0.014801	7.35014e-13	0.63754	C	T
rs247617	chr16	56956804	A	C	0.133193	0.018364	4.07819e-13	0.15862	C	A
rs740516	chr17	69086821	C	G	0.082904	0.0122082	1.11478e-11	0.50732	C	G
rs9958734	chr18	49592028	C	T	0.126826	0.0126764	1.45051e-23	0.40233	T	C
rs7231795	chr18	49609602	T	C	-0.0988043	0.0124396	1.9779e-15	0.55483	T	C
rs2569556	chr19	11108289	A	G	-0.136032	0.0186463	2.97799e-13	0.20879	G	A
rs2569546	chr19	11121523	A	G	-0.112057	0.0139989	1.19758e-15	0.52403	A	G
rs17699089	chr19	11233119	G	A	-0.115393	0.013208	2.40233e-18	0.24427	A	G
rs411920	chr19	44858375	C	T	-0.198767	0.0222604	4.29199e-19	0.10465	T	C
rs10119	chr19	44903416	A	G	0.158648	0.0222751	1.06208e-12	0.09626	G	A
rs75627662	chr19	44910319	T	C	-0.115449	0.0185442	4.79679e-10	0.18022	C	T
rs12721051	chr19	44918903	G	C	0.176805	0.023604	6.86286e-14	0.17762	C	G
rs12610625	chr19	45824180	T	C	-0.0637425	0.0116541	4.5122e-08	0.34027	C	T
rs6017718	chr20	45982098	G	T	0.0740761	0.0124054	2.35401e-09	0.38496	T	G
