# Supplementary material for: Whole genome sequencing and analysis of 4,053 individuals in trios and mother-infant duos from the Born in Guangzhou Cohort Study
Source: Research Square preprint supplement (doi:10.21203/rs.3.rs-1732885/v1), 2022-06-10
Supplement: Supplementary file 5 [file 20f36d157a3cbf31513e537c.xlsx]

## Sheet: Sheet1
Table S1.The geographic distribution of the BIGCS cohort samples investigated in this study. Related to Figure 1.
Geographical regions	Provinces	Mean age of adults	Number of samples for WGS		Number of samples for SNP-array
			Male	Female	Male	Female
North China (61)	Beijing(3)	27.96	2	1	0	0
	Hebei(26)	31.1407	8	18	0	0
	Neimenggu(14)	30.94	5	9	0	1
	Shanxi(14)	28.5857	5	9	0	0
	Tianjin(4)	32.01	0	4	0	0
Northeast China (86)	Heilongjiang(38)	31.3945	11	27	0	1
	Jilin(25)	29.6231	8	17	0	3
	Liaoning(23)	31.3992	7	16	0	3
Northwest China (73)	Gansu(14)	30.47	5	9	0	0
	Ningxia(3)	26.59	0	3	0	0
	Qinghai(5)	28.1833	1	4	0	0
	Shaanxi(41)	31.4427	15	26	0	1
	Xinjiang(10)	30.1917	5	5	0	0
Central China (417)	Henan(70)	29.6003	16	54	0	5
	Hubei(153)	30.122	49	104	0	7
	Hunan(194)	30.1813	61	133	0	17
East China (304)	Anhui(57)	28.9303	15	42	0	4
	Fujian(36)	30.2616	8	28	0	3
	Jiangsu(36)	30.6981	16	20	0	1
	Jiangxi(106)	29.2275	29	77	0	7
	Shandong(44)	29.8848	20	24	0	2
	Shanghai(7)	34.5767	2	5	0	0
	Zhejiang(18)	30.481	5	13	0	0
	Taiwan(0)	-	-	-	-	-
Southwest China (140)	Chongqing(18)	28.413	5	13	0	1
	Guizhou(26)	32.2679	8	18	0	0
	Sichuan(84)	31.0543	29	55	0	3
	Yunnan(12)	29.9467	5	7	0	0
	Tibet(0)	-	-	-	-	-
South China (2,967)	Guangdong(2,868)	29.827	959	1909	0	174
	Guangxi(85)	30.1481	26	59	0	7
	Hainan(14)	31.5857	5	9	0	0
	HongKong(0)	-	-	-	-	-
	Macao(0)	-	-	-	-	-
Unknown (5)	NA(5)	29.6767	2	3	0	0
Totoal	4053	29.9357	1332	2721	0	240
