# Supplementary material for: Whole genome sequencing and analysis of 4,053 individuals in trios and mother-infant duos from the Born in Guangzhou Cohort Study
Source: Research Square preprint supplement (doi:10.21203/rs.3.rs-1732885/v1), 2022-06-10
Supplement: Supplementary file 6 [file 33bb058b35d7691555ca5c53.xlsx]

## Sheet: Sheet1
Table S8. GWAS SNPs used to calculate the PRS for BMI (POS: GRCh38 coordinate; A: Effect allele)
SNP	CHR	POS	A	B	Beta	SE	P value	ALT allele frequency	REF	ALT
rs12044597	chr1	1777362	G	A	0.0143	0.0016	1.7e-18	0.5029	A	G
rs7535528	chr1	2512975	A	G	-0.0152	0.0018	1.4e-16	0.3741	G	A
rs6577584	chr1	6655330	G	T	0.0131	0.0018	3.7e-13	0.3463	T	G
rs7556169	chr1	8681342	G	A	0.0103	0.0018	5.4e-09	0.6143	A	G
rs10779751	chr1	11224279	G	A	-0.0139	0.0018	2.5e-14	0.7256	A	G
rs761423	chr1	16975177	C	T	-0.0113	0.0017	5.5e-11	0.45	T	C
rs967605	chr1	23073439	T	C	-0.0192	0.0023	1.7e-16	0.8334	C	T
rs785278	chr1	32842386	A	T	-0.0159	0.0023	2.8e-12	0.1771	T	A
rs4653017	chr1	33311127	T	C	0.0122	0.0018	4.5e-11	0.6818	C	T
rs9426003	chr1	34137269	A	G	-0.0116	0.0019	1.4e-09	0.2952	G	A
rs11583122	chr1	37587857	T	C	0.0182	0.003	7.4e-10	0.07905	C	T
rs2282231	chr1	39103899	T	C	0.0165	0.0021	4.8e-15	0.2249	C	T
rs2275426	chr1	46021880	A	G	0.0104	0.0016	2e-10	0.4338	G	A
rs6700838	chr1	47234355	T	C	-0.017	0.0017	2.5e-22	0.5959	C	T
rs7531656	chr1	49362991	G	A	-0.0195	0.0017	7.4e-29	0.6754	A	G
rs2356865	chr1	50370662	T	C	-0.0114	0.0019	1.6e-09	0.295	C	T
rs2481665	chr1	62129005	C	T	-0.0161	0.0016	7.2e-23	0.4408	T	C
rs11208662	chr1	65521481	C	G	0.0209	0.0031	2e-11	0.0884	G	C
rs7531118	chr1	72371556	C	T	0.0256	0.0016	3.6e-54	0.5396	T	C
rs2590942	chr1	72419598	G	T	-0.0293	0.002	1.2e-46	0.1835	T	G
rs12042908	chr1	74532078	G	A	-0.0184	0.0016	1.4e-29	0.5638	A	G
rs12035349	chr1	77091654	G	A	0.0188	0.0026	1.1e-12	0.1295	A	G
rs17391694	chr1	78157942	T	C	0.0317	0.0025	7.5e-38	0.1189	C	T
rs2154297	chr1	80326023	C	T	0.0115	0.0019	1.2e-09	0.2879	T	C
rs284227	chr1	81913762	T	C	-0.0147	0.0019	3.5e-15	0.7448	C	T
rs1973993	chr1	96478438	C	T	0.0208	0.0017	4.7e-33	0.5904	T	C
rs2030342	chr1	96922670	T	C	0.0143	0.0017	1.9e-16	0.5749	C	T
rs4372296	chr1	97854936	A	C	-0.0133	0.002	7.6e-11	0.7714	C	A
rs1730859	chr1	107075085	A	G	-0.0118	0.0017	1.1e-11	0.6584	G	A
rs12035149	chr1	107342396	G	C	0.0146	0.0021	3.9e-12	0.223	C	G
rs17531363	chr1	107434453	C	A	-0.0133	0.0019	2e-12	0.3033	A	C
rs12033257	chr1	111775862	G	A	-0.0146	0.0018	2.4e-15	0.3835	A	G
rs12731372	chr1	118310352	T	C	0.0116	0.0019	1.2e-09	0.2322	C	T
rs10923724	chr1	119004219	T	C	-0.0118	0.0016	6.4e-13	0.5725	C	T
rs6587552	chr1	151046385	G	A	-0.0173	0.002	1.6e-17	0.7591	A	G
rs905938	chr1	155018913	C	T	0.0149	0.0019	1.2e-15	0.2675	T	C
rs11577179	chr1	156013919	G	A	0.0108	0.0017	1.5e-10	0.6279	A	G
rs10733051	chr1	167311117	G	A	-0.0097	0.0016	2.9e-09	0.4802	A	G
rs12564992	chr1	174508962	G	A	0.0196	0.0026	5.3e-14	0.1144	A	G
rs6700816	chr1	174914857	T	A	-0.0345	0.0051	8.9e-12	0.03186	A	T
rs539515	chr1	177919890	C	A	0.104972	0.0128887	3.80857e-16	0.14999	A	C
rs543874	chr1	177920345	G	A	0.0475	0.002	1.2e-122	0.1952	A	G
rs10920678	chr1	190270777	G	A	-0.0155	0.0016	1.5e-21	0.5709	A	G
rs12041258	chr1	195078806	C	T	-0.0146	0.002	9.5e-13	0.2287	T	C
rs10754210	chr1	197042981	A	G	-0.0123	0.0018	3.2e-11	0.3107	G	A
rs2820311	chr1	201872348	G	A	0.0235	0.0018	4.1e-38	0.3369	A	G
rs9077	chr1	202147110	A	G	-0.0138	0.0019	3.5e-13	0.33	G	A
rs823074	chr1	205805711	C	T	-0.0112	0.0017	1.6e-10	0.4116	T	C
rs17014375	chr1	209370215	G	T	0.0172	0.0025	1.1e-11	0.1348	T	G
rs11118308	chr1	219460527	G	A	-0.0101	0.0016	4.8e-10	0.4703	A	G
rs10915840	chr1	225480822	A	G	-0.0118	0.0019	1.3e-09	0.283	G	A
rs2491864	chr1	242822761	A	G	0.0137	0.0021	7.3e-11	0.215	G	A
rs12042959	chr1	243369971	G	A	-0.0144	0.0024	3.4e-09	0.1505	A	G
rs3753549	chr1	243559590	C	T	0.0203	0.0025	1.7e-15	0.1437	T	C
rs6548221	chr2	295255	G	A	-0.0151	0.002	1.7e-14	0.7754	A	G
rs4639527	chr2	416815	G	A	0.0172	0.0019	3.3e-20	0.3012	A	G
rs6749087	chr2	629818	A	T	-0.123504	0.0170177	3.94645e-13	0.58855	A	T
rs13021737	chr2	632348	G	A	0.0574	0.0021	7.5e-157	0.8319	A	G
rs35796073	chr2	636819	A	C	-0.128725	0.0153013	4.00734e-17	0.08031	C	A
rs10929925	chr2	6015425	A	C	-0.0143	0.0016	1.8e-18	0.4301	C	A
rs7605335	chr2	24886448	A	G	0.0473523	0.0085846	3.46884e-08	0.40851	G	A
rs10182181	chr2	24927427	G	A	0.0325	0.0016	6.7e-90	0.4753	A	G
rs4372836	chr2	28751017	C	T	-0.0142	0.0018	7.3e-16	0.6966	T	C
rs17327461	chr2	35287117	C	T	-0.0125	0.0016	1.5e-14	0.5502	T	C
rs4670626	chr2	36819514	C	T	0.0113	0.0018	4.9e-10	0.6428	T	C
rs6713781	chr2	40064800	C	G	-0.0123	0.0018	3.8e-12	0.4136	G	C
rs17035438	chr2	46651477	A	G	0.0199	0.003	3.3e-11	0.09384	G	A
rs7561278	chr2	48727766	C	T	-0.0159	0.0021	5.7e-14	0.214	T	C
rs930295	chr2	50006214	C	A	-0.0211	0.0023	1e-19	0.8417	A	C
rs7598402	chr2	50508805	G	C	-0.0122	0.0017	2.1e-12	0.49	C	G
rs7601895	chr2	55054765	G	C	-0.0149	0.0019	1.7e-15	0.2957	C	G
rs13432055	chr2	56376850	C	T	0.0117	0.0018	8.9e-11	0.2859	T	C
rs929641	chr2	58565242	G	A	-0.015	0.0016	4.8e-20	0.4163	A	G
rs6545714	chr2	59080590	A	G	-0.0191	0.0017	9.1e-31	0.6139	G	A
rs4671358	chr2	59937499	A	T	0.0101	0.0017	6.7e-09	0.5961	T	A
rs980329	chr2	60057965	C	T	0.0133	0.002	2.5e-11	0.2484	T	C
rs13417156	chr2	62621184	C	T	0.0144	0.0017	2.6e-17	0.4361	T	C
rs7607351	chr2	69334995	C	T	-0.0119	0.0017	8.4e-12	0.4193	T	C
rs934515	chr2	79255517	A	G	0.0185	0.0027	7.6e-12	0.1178	G	A
rs1371108	chr2	81589127	A	C	0.0119	0.0018	9e-11	0.3247	C	A
rs7557796	chr2	86539030	C	T	-0.016	0.0018	2.3e-19	0.6524	T	C
rs4303732	chr2	100213578	C	T	-0.0144	0.0017	2.2e-16	0.3974	T	C
rs6711584	chr2	103805234	A	G	0.0128	0.0017	2.2e-13	0.454	G	A
rs1451533	chr2	104849547	A	G	0.0167	0.0019	1e-17	0.273	G	A
rs902695	chr2	113197497	A	G	-0.0103	0.0017	2.2e-09	0.4798	G	A
rs17551974	chr2	141535577	A	C	-0.0141	0.0022	1.9e-10	0.1782	C	A
rs2890652	chr2	142202362	C	T	0.017	0.0023	2.5e-13	0.1759	T	C
rs6710871	chr2	143203024	A	G	0.0179	0.0024	1e-13	0.1418	G	A
rs453520	chr2	147149634	T	C	-0.015	0.0017	7e-18	0.5834	C	T
rs16828086	chr2	150342476	G	C	-0.0103	0.0018	1e-08	0.383	C	G
rs7600699	chr2	155161751	G	C	0.0149	0.0024	6.4e-10	0.1579	C	G
rs6705349	chr2	169671647	C	T	-0.142709	0.0255711	2.39318e-08	0.10921	T	C
rs6738445	chr2	171743105	C	T	0.0133	0.0018	1.9e-13	0.7164	T	C
rs10930641	chr2	174135983	G	A	0.0137	0.0017	3.6e-15	0.4089	A	G
rs9630985	chr2	180742949	C	A	0.0177	0.0018	4.4e-22	0.6756	A	C
rs10497807	chr2	197720363	C	G	-0.011	0.0016	1.5e-11	0.5203	G	C
rs7564679	chr2	203148067	G	A	0.0116	0.0016	1.3e-12	0.5716	A	G
rs12694021	chr2	205219648	C	A	-0.0106	0.0017	1e-09	0.5519	A	C
rs972540	chr2	206380059	G	A	0.013	0.0018	8e-13	0.2728	A	G
rs17203016	chr2	207390794	G	A	0.015	0.002	2.1e-13	0.196	A	G
rs4673553	chr2	210743655	G	T	0.0142	0.0017	2.1e-16	0.4562	T	G
rs1437929	chr2	211118592	G	A	-0.0135	0.0019	9.9e-13	0.7122	A	G
rs7599312	chr2	212548507	A	G	-0.0186	0.0019	6.9e-24	0.2652	G	A
rs7607369	chr2	218414374	G	A	-0.0117	0.0016	9.3e-13	0.5613	A	G
rs11889536	chr2	219298821	G	A	-0.0189	0.0024	6.4e-15	0.1493	A	G
rs12479233	chr2	228026986	A	T	-0.0121	0.0017	1.6e-12	0.4874	T	A
rs10211055	chr2	228152201	C	T	0.0157	0.0018	7.2e-18	0.3456	T	C
rs6720868	chr2	229798860	T	C	0.0155	0.0018	5.1e-17	0.3286	C	T
rs1554193	chr3	8097114	T	A	0.0103	0.0017	4.4e-09	0.5289	A	T
rs3915844	chr3	9473172	A	G	0.0152	0.0025	2.2e-09	0.1428	G	A
rs1899951	chr3	12353341	T	C	0.017	0.0024	3.1e-12	0.1314	C	T
rs580438	chr3	13303950	T	C	0.0114	0.0018	6.5e-10	0.3319	C	T
rs11128760	chr3	15831900	G	A	-0.011	0.0017	3.1e-10	0.5974	A	G
rs4858193	chr3	20399558	C	T	-0.0129	0.0019	1.6e-11	0.2779	T	C
rs6804842	chr3	25064946	G	A	0.0156	0.0017	3.6e-21	0.572	A	G
rs9814633	chr3	41268979	A	G	0.0122	0.0018	2.1e-11	0.3434	G	A
rs10460960	chr3	42267243	A	G	0.0197	0.0025	8.1e-15	0.8876	G	A
rs28350	chr3	42376954	G	A	-0.0177	0.0022	3.5e-15	0.807	A	G
rs6442101	chr3	48089403	T	C	-0.0117	0.0017	2.5e-11	0.6817	C	T
rs2230590	chr3	49898669	C	T	0.0239	0.0017	4.1e-44	0.5075	T	C
rs12631248	chr3	50042741	G	C	0.0253	0.003	3e-17	0.07764	C	G
rs9838283	chr3	50783055	A	G	0.0161	0.0026	1e-09	0.7978	G	A
rs2710323	chr3	52781889	C	T	0.0141	0.0016	4.8e-18	0.4804	T	C
rs2680648	chr3	53743149	C	T	-0.016	0.002	3.8e-15	0.235	T	C
rs12488237	chr3	56080833	C	T	0.0235	0.0036	4.5e-11	0.05227	T	C
rs2365389	chr3	61250788	T	C	-0.0174	0.0017	1.3e-25	0.4143	C	T
rs1452075	chr3	62495388	T	C	0.0141	0.0018	1.3e-14	0.7277	C	T
rs925018	chr3	62727468	G	C	0.013	0.0018	1.4e-13	0.3235	C	G
rs11915371	chr3	70490408	C	A	0.0149	0.0021	2.6e-12	0.2038	A	C
rs775731	chr3	77575633	T	C	-0.0108	0.0017	6.6e-10	0.5878	C	T
rs3849570	chr3	81742961	A	C	0.0132	0.0017	3.3e-14	0.3414	C	A
rs10511093	chr3	83714390	T	C	-0.0228	0.0034	1.1e-11	0.07425	C	T
rs1375561	chr3	85609080	C	T	-0.0173	0.0017	3.1e-24	0.3464	T	C
rs2122042	chr3	85817185	T	G	0.0235	0.002	2.3e-31	0.2056	G	T
rs1454687	chr3	94319241	G	C	-0.0202	0.0017	5.2e-32	0.5227	C	G
rs1436343	chr3	104887286	G	A	0.0141	0.0017	7.3e-16	0.5922	A	G
rs13321566	chr3	107623815	G	A	0.0135	0.0023	4.7e-09	0.1841	A	G
rs7640424	chr3	108101216	T	C	-0.0136	0.0018	2.3e-14	0.2969	C	T
rs4273371	chr3	108400224	C	T	0.0115	0.0016	1.2e-12	0.4984	T	C
rs17681451	chr3	114680449	A	G	-0.0197	0.0031	3.5e-10	0.08384	G	A
rs6804181	chr3	117218699	T	A	-0.0153	0.0023	5.5e-11	0.1787	A	T
rs4624596	chr3	119852694	C	T	-0.0136	0.0023	2.2e-09	0.1851	T	C
rs2124499	chr3	123374694	C	G	-0.0123	0.0017	3.4e-13	0.3718	G	C
rs1909586	chr3	124968923	T	G	-0.0106	0.0018	4.8e-09	0.5975	G	T
rs1320903	chr3	132039233	A	G	0.0216	0.0018	9.2e-32	0.3174	G	A
rs10935143	chr3	134946317	A	G	-0.0109	0.0017	2.8e-10	0.4535	G	A
rs6786582	chr3	136180142	C	T	0.0159	0.0018	7.5e-18	0.2745	T	C
rs16851483	chr3	141556594	T	G	0.0369	0.0035	3.2e-26	0.06928	G	T
rs355777	chr3	154317161	C	G	0.0153	0.0017	1.4e-18	0.4106	G	C
rs7615297	chr3	156581524	G	C	-0.0149	0.0024	5.7e-10	0.1465	C	G
rs6767619	chr3	157175993	C	G	0.0119	0.0018	8.1e-11	0.345	G	C
rs827092	chr3	158267393	C	T	-0.0129	0.0017	1.1e-13	0.4169	T	C
rs5396	chr3	171027026	C	T	0.0154	0.0018	3e-17	0.2765	T	C
rs39654	chr3	173377333	G	A	0.0145	0.0017	6.5e-17	0.5547	A	G
rs262956	chr3	183768329	G	T	-0.0125	0.0018	6.1e-12	0.6528	T	G
rs2293605	chr3	184326645	T	C	-0.0167	0.0027	3.6e-10	0.1307	C	T
rs9816226	chr3	186116710	T	A	0.0323	0.0021	1.6e-52	0.8199	A	T
rs6764533	chr3	196361593	A	G	0.0116	0.0018	1.4e-10	0.359	G	A
rs1477887	chr4	18513204	G	A	0.0138	0.0017	2e-15	0.5433	A	G
rs1323068	chr4	20261435	A	G	-0.0114	0.0018	6.9e-10	0.3207	G	A
rs9291467	chr4	25426674	C	T	-0.014	0.0017	6.7e-16	0.5375	T	C
rs6448587	chr4	28560368	C	A	-0.0167	0.0023	2.3e-13	0.1891	A	C
rs1345148	chr4	30841911	C	T	0.0111	0.0017	2.5e-10	0.3966	T	C
rs1000096	chr4	38691214	T	C	-0.0144	0.0018	1.8e-15	0.3801	C	T
rs1866510	chr4	44512451	T	C	-0.0105	0.0018	8.1e-09	0.3498	C	T
rs12507026	chr4	45179317	T	A	0.0676675	0.0112538	1.82281e-09	0.28694	A	T
rs10938397	chr4	45180510	G	A	0.0324	0.0016	3.4e-86	0.4317	A	G
rs2768950	chr4	49062470	G	A	-0.0116	0.0019	7.5e-10	0.7493	A	G
rs711347	chr4	52060050	A	T	-0.0122	0.0019	4.5e-10	0.7489	T	A
rs1492767	chr4	54355300	T	C	0.0094	0.0016	1e-08	0.4957	C	T
rs2192158	chr4	54639193	G	A	-0.0129	0.0017	8.3e-14	0.5399	A	G
rs925421	chr4	59388159	G	A	-0.0116	0.002	5.8e-09	0.7343	A	G
rs11945861	chr4	64835147	A	G	-0.0148	0.002	5e-13	0.2369	G	A
rs7674623	chr4	79873527	T	C	0.0135	0.0022	5.7e-10	0.1976	C	T
rs4148155	chr4	88133515	G	A	-0.0188	0.0026	5e-13	0.1127	A	G
rs1903579	chr4	90332805	C	G	0.0111	0.0017	1.1e-10	0.5502	G	C
rs2850969	chr4	101262437	C	T	0.0165	0.0024	1.3e-11	0.1427	T	C
rs7377083	chr4	101787840	A	C	0.02	0.0018	1.4e-27	0.4357	C	A
rs6843738	chr4	103014844	A	G	-0.0107	0.0017	7.2e-10	0.329	G	A
rs326889	chr4	111792280	C	T	0.0129	0.0018	2.4e-13	0.6072	T	C
rs7694732	chr4	114202933	G	A	-0.0099	0.0017	8.7e-09	0.4378	A	G
rs4864201	chr4	129810129	C	T	-0.0141	0.0017	1.5e-16	0.6469	T	C
rs1296328	chr4	136162038	C	A	-0.0179	0.0018	4.9e-24	0.5657	A	C
rs769674	chr4	139960810	T	A	-0.0135	0.0018	2.2e-13	0.3219	A	T
rs331949	chr4	142742053	C	T	0.011	0.0017	1e-10	0.3734	T	C
rs1455137	chr4	145065516	C	A	0.0106	0.0017	4.4e-10	0.3803	A	C
rs11736228	chr4	146455653	T	A	-0.0139	0.002	4.1e-12	0.2587	A	T
rs6827083	chr4	152154339	G	A	0.0097	0.0016	4.8e-09	0.4309	A	G
rs13110266	chr4	161208692	A	G	-0.0117	0.0017	1.9e-12	0.4065	G	A
rs17538472	chr4	162117089	T	C	0.0129	0.0022	4.2e-09	0.1908	C	T
rs1522569	chr4	170711486	G	T	-0.0164	0.0022	2.9e-13	0.1819	T	G
rs7683836	chr4	179246752	A	G	-0.0114	0.0017	6.3e-11	0.5405	G	A
rs4518345	chr5	27185797	A	G	-0.0117	0.0019	1e-09	0.2842	G	A
rs7730004	chr5	43190931	T	C	0.0148	0.0018	9.1e-16	0.6693	C	T
rs6449531	chr5	61416385	A	G	-0.0127	0.0018	2.1e-12	0.3537	G	A
rs6888159	chr5	64636407	G	C	-0.0114	0.0018	5.8e-10	0.3172	C	G
rs2367112	chr5	64872366	G	T	-0.0119	0.0016	2.3e-13	0.4919	T	G
rs25832	chr5	66879854	G	A	-0.0118	0.0019	9.2e-10	0.268	A	G
rs2307111	chr5	75707853	C	T	-0.0265	0.0016	1.6e-58	0.3962	T	C
rs12514473	chr5	81522820	C	T	-0.0167	0.002	8.8e-17	0.2313	T	C
rs7444298	chr5	88434210	G	A	-0.0179	0.002	7.8e-19	0.2461	A	G
rs2304607	chr5	88692916	G	A	0.032	0.0025	1.7e-36	0.148	A	G
rs12655756	chr5	89562391	A	T	0.0138	0.0018	1.9e-14	0.3697	T	A
rs159032	chr5	94870497	T	C	0.0129	0.002	1.9e-10	0.2439	C	T
rs6235	chr5	96393194	G	C	0.0175	0.0019	1.5e-19	0.2702	C	G
rs2611742	chr5	96520797	C	T	0.0152	0.0017	3.7e-18	0.4039	T	C
rs7710595	chr5	107170996	C	A	-0.0101	0.0017	5e-09	0.466	A	C
rs40067	chr5	108103311	A	G	-0.0266	0.0023	7.1e-30	0.1713	G	A
rs6595205	chr5	120036838	G	C	-0.0114	0.0016	2e-12	0.5305	C	G
rs7711753	chr5	123397623	A	G	-0.0134	0.0016	3.4e-16	0.4356	G	A
rs329124	chr5	134529762	G	A	-0.0131	0.0017	5.3e-14	0.4233	A	G
rs13174863	chr5	139701160	G	A	0.0192	0.0023	2.9e-16	0.1548	A	G
rs2190788	chr5	145104698	T	G	0.0141	0.0019	2.9e-14	0.3106	G	T
rs7715256	chr5	154158333	T	G	-0.0166	0.0016	2.2e-24	0.5781	G	T
rs17056301	chr5	158844672	C	T	0.0118	0.002	2.4e-09	0.2636	T	C
rs248139	chr5	167925778	A	G	0.0133	0.0022	1.2e-09	0.1933	G	A
rs9463175	chr6	9509797	T	C	-0.0108	0.0017	4.2e-10	0.3483	C	T
rs2228213	chr6	12124622	A	G	-0.0139	0.0017	4.6e-16	0.3481	G	A
rs9367368	chr6	13189043	C	T	-0.0121	0.0018	1e-11	0.3033	T	C
rs11753081	chr6	20705359	G	T	-0.0138	0.0021	8.9e-11	0.1749	T	G
rs7760082	chr6	21919156	A	G	-0.0122	0.0018	2.9e-11	0.6646	G	A
rs6900723	chr6	23876012	C	T	0.0112	0.0018	1.4e-09	0.324	T	C
rs853679	chr6	28329086	A	C	0.0134	0.0022	2.8e-09	0.1407	C	A
rs498240	chr6	31924815	A	G	-0.0267	0.0033	1.6e-15	0.0656	G	A
rs419261	chr6	33586370	C	T	-0.0106	0.0017	1.9e-10	0.5958	T	C
rs12215331	chr6	34676972	C	T	-0.0177	0.002	4.3e-18	0.2136	T	C
rs9394312	chr6	35704553	C	G	0.0109	0.0017	2.3e-10	0.4917	G	C
rs17757975	chr6	38246374	C	T	-0.0143	0.0024	4.2e-09	0.1482	T	C
rs847747	chr6	40112330	T	G	-0.0113	0.0019	2.1e-09	0.2964	G	T
rs7748777	chr6	41166068	A	G	0.0105	0.0016	1.6e-10	0.4587	G	A
rs9349239	chr6	42708742	G	A	-0.0122	0.0017	1.3e-12	0.508	A	G
rs998584	chr6	43790159	A	C	-0.0131	0.0017	1.3e-14	0.4775	C	A
rs2206271	chr6	50818295	A	T	0.054008	0.0094544	1.11346e-08	0.34507	T	A
rs987237	chr6	50835337	G	A	0.0409	0.0021	9.3e-84	0.1803	A	G
rs2635727	chr6	50853227	C	T	0.028	0.0019	1.3e-49	0.7459	T	C
rs2504674	chr6	51295884	C	G	-0.0112	0.0017	1.2e-10	0.4336	G	C
rs1358808	chr6	51960487	G	C	0.0142	0.0018	9.2e-15	0.3265	C	G
rs4278019	chr6	53828612	A	T	0.0112	0.0019	5e-09	0.2815	T	A
rs9475173	chr6	55148493	A	G	0.0108	0.0019	6.6e-09	0.6535	G	A
rs1020548	chr6	56945741	A	G	-0.0132	0.0023	6.6e-09	0.8344	G	A
rs6921533	chr6	73032611	C	T	-0.0118	0.0019	5.6e-10	0.7118	T	C
rs9688431	chr6	73212931	C	T	-0.0231	0.0035	2.4e-11	0.06034	T	C
rs148304869	chr6	80952551	T	G	-0.133671	0.0196692	1.07597e-11	0.06424	G	T
rs9294260	chr6	82723511	A	G	0.0147	0.0016	1.8e-19	0.4731	G	A
rs1853639	chr6	86897124	A	G	-0.0111	0.0018	1.2e-09	0.6363	G	A
rs9362662	chr6	89586869	G	A	-0.0112	0.0017	1.2e-10	0.5201	A	G
rs1324110	chr6	93203482	C	G	-0.0103	0.0017	6.8e-10	0.4391	G	C
rs13209872	chr6	97305347	C	G	-0.0152	0.0018	1.4e-16	0.3403	G	C
rs901630	chr6	98091643	T	C	-0.0146	0.0017	1.9e-18	0.3973	C	T
rs156151	chr6	104351132	G	C	0.0165	0.0021	1.9e-14	0.8088	C	G
rs3800229	chr6	108675760	T	G	0.0175	0.0018	1.4e-22	0.7123	G	T
rs2357760	chr6	119892734	A	G	0.0145	0.0017	6.8e-17	0.6754	G	A
rs2875762	chr6	124603886	C	G	0.0139	0.002	1.2e-11	0.2473	G	C
rs13209968	chr6	125768139	C	G	0.0114	0.0017	3.1e-11	0.5177	G	C
rs6569648	chr6	130027974	T	C	-0.0126	0.0019	3.7e-11	0.7726	C	T
rs2781668	chr6	131576138	T	C	0.0169	0.0023	4e-13	0.1612	C	T
rs13201877	chr6	137354404	G	A	0.0152	0.0024	2.7e-10	0.1399	A	G
rs2185027	chr6	153060487	C	A	0.0135	0.0018	5e-14	0.2968	A	C
rs10499276	chr6	153988673	T	C	0.0172	0.0025	2.2e-12	0.1242	C	T
rs487060	chr6	160353427	T	C	0.011	0.0016	1.6e-11	0.4816	C	T
rs13191362	chr6	162612318	G	A	-0.0236	0.0025	5.9e-21	0.1198	A	G
rs6461115	chr7	2064033	G	A	-0.0144	0.0019	1.2e-13	0.2285	A	G
rs4722398	chr7	3085586	T	C	0.0158	0.0025	3.6e-10	0.1336	C	T
rs6463489	chr7	5502882	C	T	-0.0157	0.0026	3.1e-09	0.8913	T	C
rs7784465	chr7	6378644	C	T	0.0164	0.0025	1.1e-10	0.1393	T	C
rs6968554	chr7	17247482	G	A	0.01	0.0017	3.5e-09	0.6398	A	G
rs40245	chr7	21430918	T	A	-0.011	0.0018	1.9e-09	0.6409	A	T
rs4307239	chr7	24314681	G	A	0.0115	0.0017	3.9e-11	0.4578	A	G
rs11971041	chr7	26659229	G	A	0.021	0.0031	1e-11	0.09384	A	G
rs4722672	chr7	27192143	T	C	-0.0151	0.0021	1.8e-12	0.8151	C	T
rs849135	chr7	28156794	A	G	0.0109	0.0016	2e-11	0.4914	G	A
rs215632	chr7	32328912	G	A	-0.0152	0.0018	3.7e-17	0.6382	A	G
rs1229057	chr7	39014938	T	C	0.017	0.0027	2.8e-10	0.1216	C	T
rs799449	chr7	44745098	T	C	0.013	0.0017	8.7e-14	0.5505	C	T
rs10269783	chr7	49576607	A	G	0.0133	0.0017	1.4e-15	0.3896	G	A
rs3807566	chr7	50496506	T	G	-0.0127	0.0017	2e-13	0.443	G	T
rs1035010	chr7	70133342	T	C	0.0139	0.002	6.2e-12	0.2566	C	T
rs4718966	chr7	70575572	T	C	0.0127	0.0018	4.6e-13	0.4183	C	T
rs13227433	chr7	74680386	G	T	0.0156	0.002	1.4e-14	0.2562	G	T
rs740157	chr7	77426568	G	A	-0.0116	0.0016	1.8e-12	0.5678	A	G
rs1544459	chr7	77788267	C	T	0.0103	0.0016	2.2e-10	0.4536	T	C
rs1852006	chr7	78200451	A	G	-0.0156	0.0018	4.9e-18	0.3519	G	A
rs7805441	chr7	78492141	T	C	0.0109	0.0017	3.4e-10	0.5092	C	T
rs6963840	chr7	78515054	T	C	0.0154	0.0024	3.4e-10	0.2111	C	T
rs13247665	chr7	93602745	C	T	0.0139	0.0018	1.4e-14	0.3593	T	C
rs13240600	chr7	99466843	G	A	-0.0204	0.0024	3.5e-17	0.1552	A	G
rs11496125	chr7	103777110	T	C	0.0169	0.0017	3e-22	0.4212	C	T
rs13227658	chr7	113713199	T	C	-0.0157	0.0017	1.7e-19	0.5534	C	T
rs12705987	chr7	114709157	A	T	0.0135	0.0017	9.5e-15	0.4036	T	A
rs1899689	chr7	122324295	T	C	0.0117	0.0016	1.5e-12	0.3986	C	T
rs2283093	chr7	127081177	T	C	0.0127	0.0021	3.1e-09	0.2066	C	T
rs972283	chr7	130782095	G	A	-0.0096	0.0016	5.1e-09	0.5151	A	G
rs3800649	chr7	137739763	A	G	0.0122	0.0019	3.2e-10	0.277	G	A
rs1814170	chr7	139109403	T	A	-0.0203	0.0029	2.1e-12	0.1054	A	T
rs11773362	chr7	147971088	T	C	-0.0111	0.0018	1.5e-09	0.3369	C	T
rs4725984	chr7	150971426	C	T	0.0128	0.0017	1.4e-13	0.641	T	C
rs1658820	chr8	4431055	T	G	0.0141	0.0021	5.9e-12	0.2468	G	T
rs7827182	chr8	8522961	C	G	0.0177	0.0018	1.7e-22	0.4946	G	C
rs1394	chr8	9654144	A	G	-0.0154	0.0017	2.8e-19	0.6404	G	A
rs11783247	chr8	10931365	T	C	-0.0169	0.0016	1.2e-24	0.5375	C	T
rs4841659	chr8	11970691	T	C	0.0149	0.0017	9.2e-18	0.4785	C	T
rs13263601	chr8	14238391	C	A	0.0154	0.0018	2.2e-17	0.3478	A	C
rs2543132	chr8	15678802	C	G	0.0146	0.0022	5e-11	0.8134	G	C
rs4366093	chr8	20782300	C	T	0.0121	0.0018	6.7e-11	0.6798	T	C
rs11781222	chr8	23532058	C	T	-0.0158	0.0024	5.3e-11	0.1286	T	C
rs17446091	chr8	27310425	C	T	0.0123	0.002	1.8e-09	0.2074	T	C
rs1982441	chr8	28164252	T	G	0.0175	0.0026	7e-12	0.1381	G	T
rs2100814	chr8	28260613	A	G	0.0113	0.0017	1.2e-10	0.4103	G	A
rs1362910	chr8	30998948	G	A	-0.0121	0.0017	1.2e-12	0.5815	A	G
rs7844647	chr8	34646258	C	T	-0.0123	0.0018	2.8e-11	0.2681	T	C
rs4737183	chr8	63808136	G	A	-0.0112	0.0017	1.1e-10	0.4705	A	G
rs16932761	chr8	66290552	A	G	-0.014	0.002	1.7e-12	0.2542	G	A
rs1431659	chr8	72526835	G	A	-0.0196	0.0019	6e-24	0.7344	A	G
rs2170382	chr8	73777053	T	C	0.0172	0.0027	2.4e-10	0.1203	C	T
rs1405348	chr8	76315987	G	A	0.0204	0.0017	6.2e-32	0.5676	A	G
rs16907751	chr8	80463222	T	C	-0.0209	0.003	1.6e-12	0.1047	C	T
rs733594	chr8	84165451	T	C	0.0138	0.0018	5.9e-14	0.718	C	T
rs2634047	chr8	84784102	C	G	-0.0149	0.002	2.5e-13	0.2422	G	C
rs7006629	chr8	86507313	T	C	0.0109	0.0017	2.5e-10	0.5258	C	T
rs1700137	chr8	88449380	T	C	-0.0121	0.0019	2.5e-10	0.3121	C	T
rs12680842	chr8	94570378	G	A	-0.0133	0.0018	4.4e-14	0.3205	A	G
rs3134353	chr8	100935225	T	A	0.0125	0.0018	2.5e-12	0.6132	A	T
rs3808434	chr8	115547208	G	A	-0.011	0.0016	1.3e-11	0.5525	A	G
rs2721965	chr8	115649811	C	A	-0.0171	0.0018	1.1e-20	0.3335	A	C
rs11781699	chr8	117850822	C	T	0.0132	0.0021	3.1e-10	0.1896	T	C
rs12675063	chr8	131866800	T	A	0.0156	0.0026	1.3e-09	0.1131	A	T
rs16906845	chr8	137202985	A	G	-0.0225	0.0038	2.2e-09	0.06683	G	A
rs903959	chr8	141620682	A	T	0.0106	0.0018	1.6e-09	0.3965	T	A
rs7042372	chr9	6959840	G	A	-0.0122	0.0018	3.8e-11	0.3427	A	G
rs1865341	chr9	8845911	T	C	0.0128	0.002	2.5e-10	0.758	C	T
rs17820822	chr9	11831420	G	T	-0.0143	0.0018	2.9e-15	0.3554	T	G
rs11790280	chr9	14651285	C	T	0.0103	0.0018	7.1e-09	0.3862	T	C
rs6474945	chr9	15670494	T	G	-0.0186	0.0016	4.7e-30	0.4498	G	T
rs10962549	chr9	16719447	T	C	0.0198	0.0023	2.5e-17	0.168	C	T
rs7874154	chr9	27777014	C	T	0.0127	0.0017	1.8e-13	0.4979	T	C
rs1412235	chr9	28410998	C	G	0.0246	0.0017	6e-45	0.3175	G	C
rs5019683	chr9	30632201	A	T	0.0752258	0.013777	4.75477e-08	0.14444	T	A
rs10971712	chr9	33820940	T	C	-0.0197	0.0027	6.4e-13	0.1076	C	T
rs13290794	chr9	37183631	A	G	-0.0141	0.0018	1.9e-15	0.3582	G	A
rs2174307	chr9	71176933	C	G	0.0121	0.0017	4.9e-12	0.4067	G	C
rs10867256	chr9	78752475	T	C	-0.0118	0.0017	8.7e-12	0.553	C	T
rs3739733	chr9	86282976	G	A	-0.0132	0.0021	5.3e-10	0.2197	A	G
rs10797115	chr9	89576341	T	C	0.0124	0.0017	9.9e-13	0.5365	C	T
rs7869771	chr9	91418345	C	A	-0.014	0.0019	4.9e-13	0.2647	A	C
rs4744275	chr9	93720351	A	G	0.0144	0.0018	7e-15	0.266	G	A
rs450231	chr9	98718923	A	G	-0.0127	0.002	2.1e-10	0.7534	G	A
rs10118701	chr9	100299084	G	A	0.0163	0.0018	1.1e-18	0.3227	A	G
rs10989568	chr9	101634022	G	A	-0.0107	0.0017	6.6e-10	0.5381	A	G
rs7024334	chr9	106309794	G	T	-0.0138	0.002	3.1e-12	0.7742	T	G
rs6477694	chr9	109170062	T	C	-0.0123	0.0017	3.8e-13	0.6441	C	T
rs7865157	chr9	119869282	T	C	0.0177	0.0028	3.7e-10	0.1068	C	T
rs10818810	chr9	123334243	A	G	0.0126	0.0017	1.1e-13	0.3908	G	A
rs10818938	chr9	124286958	A	G	0.0114	0.0017	5.1e-11	0.4215	G	A
rs3829849	chr9	126628521	T	C	0.0098	0.0017	5.9e-09	0.3589	C	T
rs3902840	chr9	126656746	A	G	0.0222	0.003	3.2e-13	0.08589	G	A
rs13292976	chr9	126705061	T	C	0.0131	0.0017	3.1e-14	0.4458	C	T
rs7871866	chr9	128265703	C	G	0.0187	0.0024	2.3e-14	0.1531	G	C
rs4740383	chr9	130908179	A	G	0.0126	0.0018	1.9e-12	0.416	G	A
rs11792069	chr9	137751669	G	A	-0.0145	0.0024	6.5e-10	0.17	A	G
rs11251352	chr10	2543600	G	A	0.0109	0.0018	7e-10	0.5988	A	G
rs7893571	chr10	16708130	T	G	0.0136	0.0018	1.8e-13	0.662	G	T
rs12776880	chr10	19487899	T	A	-0.0128	0.0019	3e-11	0.3172	A	T
rs7084454	chr10	21532345	A	G	0.0193	0.0019	4e-25	0.335	G	A
rs3781099	chr10	27029847	T	C	0.021	0.0031	2.5e-11	0.08203	C	T
rs3851083	chr10	33573799	A	G	-0.0102	0.0016	4.1e-10	0.4325	G	A
rs1937684	chr10	51920325	A	T	0.0112	0.0018	8.7e-10	0.6592	T	A
rs2163188	chr10	63554951	C	G	0.0131	0.0017	2e-14	0.474	G	C
rs12098284	chr10	74287706	T	C	0.0178	0.0026	1.8e-11	0.1241	C	T
rs7899106	chr10	85651147	G	A	0.0331	0.0037	1e-18	0.04777	A	G
rs10887578	chr10	86336290	C	G	0.0128	0.0017	1.6e-13	0.4896	G	C
rs2631681	chr10	91273186	T	C	-0.0113	0.0017	8.9e-11	0.3252	C	T
rs577525	chr10	98009631	C	T	0.0166	0.0017	9.7e-22	0.5676	T	C
rs1983864	chr10	98257696	G	T	-0.0158	0.0018	3.7e-18	0.3326	T	G
rs17094222	chr10	100635683	C	T	0.0181	0.002	2.2e-19	0.2039	T	C
rs10883553	chr10	100875718	A	C	0.0119	0.0018	1.9e-11	0.4511	C	A
rs9787495	chr10	101446358	A	G	-0.0103	0.0017	3.1e-09	0.4366	G	A
rs7083450	chr10	102224303	T	C	0.0159	0.0023	1.7e-12	0.8388	C	T
rs10883759	chr10	102652292	A	G	-0.0122	0.0018	5.4e-12	0.3023	G	A
rs12411886	chr10	102925542	A	C	0.0271	0.003	1.5e-19	0.08261	C	A
rs7903146	chr10	112998590	T	C	-0.0181	0.0018	1.3e-23	0.2912	C	T
rs845084	chr10	123460520	A	G	0.014	0.002	1.3e-12	0.2678	G	A
rs17636031	chr10	124905509	C	T	0.016	0.0019	1.2e-17	0.2701	T	C
rs10840606	chr11	2213460	G	A	0.0164	0.0024	3.2e-12	0.1741	A	G
rs12575252	chr11	8672526	C	G	-0.0182	0.0017	1.8e-26	0.351	G	C
rs1037587	chr11	11775180	T	C	0.0106	0.0017	1.1e-09	0.4535	C	T
rs900144	chr11	13272721	T	C	0.0166	0.0017	8.7e-22	0.5674	C	T
rs10832778	chr11	17372526	G	C	0.0125	0.0017	1.3e-13	0.6222	C	G
rs7124442	chr11	27655494	T	C	-0.0286	0.0017	4.6e-61	0.6832	C	T
rs6265	chr11	27658369	T	C	-0.0412	0.0021	1e-86	0.1951	C	T
rs7948120	chr11	28741774	T	C	-0.0132	0.0019	7.3e-12	0.2598	C	T
rs1552717	chr11	29136948	T	A	-0.0149	0.0025	3.5e-09	0.1348	A	T
rs1782507	chr11	30222321	T	G	-0.0135	0.0018	1.3e-13	0.6532	G	T
rs223051	chr11	32109757	T	C	0.0112	0.0018	1.1e-09	0.6759	C	T
rs10838122	chr11	43529866	C	T	0.0105	0.0017	1.5e-09	0.5198	T	C
rs12577642	chr11	43706984	T	A	0.0213	0.0018	9.9e-31	0.314	A	T
rs12574668	chr11	46401136	A	C	0.0132	0.0023	8.8e-09	0.1785	C	A
rs7124681	chr11	47508395	A	C	0.0263	0.0016	3.2e-58	0.4133	C	A
rs7120873	chr11	49437922	T	C	0.0172	0.0027	3.4e-10	0.111	C	T
rs11600990	chr11	64315335	T	C	-0.0178	0.0023	3.8e-14	0.1569	C	T
rs7102454	chr11	65827349	C	T	0.0158	0.0018	2.4e-18	0.3435	T	C
rs587230	chr11	69485003	G	A	-0.0149	0.0023	4.7e-11	0.835	A	G
rs1789165	chr11	69667201	A	G	0.0138	0.0017	8e-16	0.6389	G	A
rs7123876	chr11	72733538	C	T	0.0119	0.0019	2.2e-10	0.246	T	C
rs7117238	chr11	78329213	A	G	-0.0131	0.0022	2.5e-09	0.168	G	A
rs10830452	chr11	90233034	G	A	0.0111	0.0018	2.1e-09	0.3288	A	G
rs2605603	chr11	93487939	A	G	-0.0103	0.0016	2.5e-10	0.4887	G	A
rs1939002	chr11	101351910	C	T	-0.0473411	0.00910875	2.02181e-07	0.36147	T	C
rs5002114	chr11	101381022	T	C	-0.055339	0.00968879	1.11884e-08	0.5577	T	C
rs719802	chr11	113363957	C	T	-0.0101	0.0018	9.5e-09	0.6197	T	C
rs1048932	chr11	115174130	A	C	-0.016	0.0017	3.8e-22	0.4162	C	A
rs12420725	chr11	117146814	G	A	0.0226	0.0037	1.3e-09	0.05858	A	G
rs1003081	chr11	119043282	T	C	0.0121	0.0016	1.3e-13	0.4497	C	T
rs4936671	chr11	122071804	G	C	-0.0105	0.0018	6.2e-09	0.6328	C	G
rs7941030	chr11	122651667	C	T	0.0112	0.0017	2e-11	0.3859	T	C
rs3134438	chr11	122894959	A	C	0.0113	0.0019	6.1e-09	0.2855	C	A
rs1625427	chr11	132087399	C	T	-0.013	0.0018	1.4e-12	0.3496	T	C
rs4936175	chr11	132772064	C	T	0.0122	0.0017	1.4e-12	0.4445	T	C
rs329651	chr11	133897727	T	G	0.0164	0.0021	9e-15	0.8055	G	T
rs12364470	chr11	134731118	G	T	0.0178	0.0022	1.1e-15	0.1626	T	G
rs11611246	chr12	830314	T	G	0.024	0.002	5e-32	0.21	G	T
rs2429150	chr12	2043489	C	A	0.0111	0.0018	2.7e-10	0.4164	A	C
rs12422552	chr12	14260997	C	G	-0.0134	0.002	1.6e-11	0.2663	G	C
rs10744146	chr12	17059947	A	G	-0.0122	0.0017	1.4e-12	0.5146	G	A
rs621042	chr12	18636073	A	C	-0.0107	0.0017	6.3e-10	0.451	C	A
rs10772055	chr12	33226505	G	C	0.0172	0.0024	2.1e-12	0.1344	C	G
rs10876418	chr12	39035000	T	C	-0.0123	0.0019	2.8e-10	0.2325	C	T
rs2733287	chr12	41487107	C	A	0.0157	0.0017	6.8e-20	0.4829	A	C
rs4077093	chr12	51199833	G	T	-0.0128	0.0022	5.1e-09	0.783	T	G
rs4759073	chr12	54259474	A	G	-0.0116	0.0017	2.8e-11	0.4005	G	A
rs4759228	chr12	56114625	C	G	-0.0157	0.0019	5.9e-16	0.2971	G	C
rs7975187	chr12	60570327	G	A	0.0128	0.0021	1.4e-09	0.2074	A	G
rs1819844	chr12	67811824	G	A	-0.0143	0.0021	2.6e-11	0.8203	A	G
rs10878946	chr12	69248535	T	C	-0.0141	0.0019	3.6e-13	0.714	C	T
rs11115176	chr12	82072018	C	T	-0.0121	0.0019	2e-10	0.2399	T	C
rs2731222	chr12	90201606	C	A	-0.0131	0.0019	1.5e-11	0.7297	A	C
rs10745785	chr12	97192479	T	C	-0.0111	0.0018	1.2e-09	0.6674	C	T
rs651548	chr12	99166405	G	A	-0.0139	0.0018	2e-14	0.6323	A	G
rs4764949	chr12	103264318	G	A	-0.0184	0.0018	1.7e-23	0.3357	A	G
rs11611496	chr12	108020051	A	G	-0.0169	0.002	1.7e-16	0.2218	G	A
rs17608150	chr12	109608893	T	C	0.0196	0.0031	1.3e-10	0.07536	C	T
rs6606686	chr12	110465575	C	G	-0.0136	0.0018	7.6e-15	0.6903	G	C
rs11066301	chr12	112433568	G	A	-0.0114	0.0016	4.4e-12	0.4339	A	G
rs4766710	chr12	113999903	G	A	-0.0229	0.0035	3.7e-11	0.0642	A	G
rs7973955	chr12	117971835	A	G	-0.0126	0.0019	3.7e-11	0.2847	G	A
rs3887080	chr12	121224163	A	G	0.0181	0.0026	5.1e-12	0.1214	G	A
rs7133378	chr12	123924955	A	G	0.0125	0.0018	9.4e-13	0.3269	G	A
rs10773049	chr12	124022084	C	T	0.0116	0.0017	4.1e-12	0.4017	T	C
rs7968230	chr12	132905331	G	A	-0.0131	0.0018	1.6e-12	0.6774	A	G
rs1218822	chr13	27437826	A	G	0.0168	0.0017	1.9e-22	0.6663	G	A
rs1006353	chr13	27473132	G	A	-0.0126	0.0019	2.3e-11	0.7515	A	G
rs9507983	chr13	28045899	C	T	0.0156	0.0018	1.4e-18	0.3928	T	C
rs1045411	chr13	30459095	T	C	-0.0148	0.0019	2.3e-15	0.2647	C	T
rs9595908	chr13	32610151	C	T	-0.0159	0.0017	4.2e-21	0.3723	T	C
rs9603697	chr13	40209186	T	C	0.0141	0.0018	2.6e-14	0.3186	C	T
rs12429545	chr13	53528071	A	G	0.0316	0.0025	9.6e-38	0.1248	G	A
rs9527706	chr13	57828345	G	A	0.0115	0.0018	5.1e-10	0.2714	A	G
rs9538141	chr13	58604124	A	G	0.0164	0.0017	3.5e-21	0.509	G	A
rs1333423	chr13	58850977	T	A	-0.0168	0.002	2.1e-16	0.7747	A	T
rs892261	chr13	65310059	C	T	0.0103	0.0017	2.2e-09	0.5571	T	C
rs9540493	chr13	65631572	G	A	-0.0139	0.0017	8.1e-17	0.5581	A	G
rs9571687	chr13	66898581	A	C	-0.0129	0.0018	2.8e-12	0.329	C	A
rs629443	chr13	75811939	G	T	-0.0116	0.0019	1.4e-09	0.7499	T	G
rs1668633	chr13	77797755	T	C	0.01	0.0017	8.7e-09	0.5738	C	T
rs9530843	chr13	78989614	C	A	-0.0128	0.0018	4.8e-13	0.4442	A	C
rs1927790	chr13	96269937	C	T	0.0148	0.0016	1.8e-19	0.4109	T	C
rs7334078	chr13	98468230	C	T	-0.0121	0.0019	2.2e-10	0.2882	T	C
rs2479958	chr13	111331897	G	A	-0.0154	0.0018	1.5e-17	0.5075	A	G
rs10132280	chr14	25458973	A	C	-0.0223	0.0018	5.6e-35	0.3017	C	A
rs4981693	chr14	29211125	A	G	0.0206	0.002	6.9e-24	0.771	G	A
rs12885454	chr14	29267632	A	C	-0.0185	0.0017	2.4e-27	0.3431	C	A
rs8016859	chr14	30015516	C	G	0.0349	0.0043	7.1e-16	0.03964	G	C
rs17522122	chr14	32833676	T	G	0.0159	0.0017	1.5e-21	0.4812	G	T
rs9806058	chr14	35204264	T	A	-0.0164	0.0026	4e-10	0.123	A	T
rs1956151	chr14	39631856	G	A	0.013	0.0022	7.3e-09	0.1787	A	G
rs12587412	chr14	46803220	G	T	-0.0146	0.0017	4.8e-17	0.5104	T	G
rs217671	chr14	61893746	G	A	0.0144	0.0019	1.3e-13	0.2719	A	G
rs17105272	chr14	77063440	T	C	0.011	0.0019	3.2e-09	0.3186	C	T
rs10146527	chr14	79033507	C	T	-0.0137	0.0017	2.3e-15	0.3639	T	C
rs7144011	chr14	79474040	T	G	0.0282	0.002	5.2e-47	0.2136	G	T
rs12888545	chr14	87841700	G	A	0.0136	0.002	9.1e-12	0.2519	A	G
rs3850422	chr14	99205451	A	G	-0.0114	0.0016	3.7e-12	0.446	G	A
rs12147845	chr14	100678259	T	C	0.0199	0.0027	4.5e-13	0.1135	C	T
rs7147503	chr14	101073047	T	C	-0.0119	0.0018	2e-11	0.3697	C	T
rs8016771	chr14	102183114	G	T	0.019	0.0031	1.1e-09	0.08752	T	G
rs3803286	chr14	102780133	G	A	-0.0181	0.0018	4.1e-23	0.6569	A	G
rs2010281	chr14	103395985	A	G	-0.0161	0.0017	6.7e-21	0.3552	G	A
rs4906908	chr15	26794935	G	T	0.0103	0.0017	2.5e-09	0.5253	T	G
rs4284600	chr15	31551325	C	T	0.0118	0.0017	1.3e-11	0.4712	T	C
rs8036040	chr15	36110515	A	C	0.0109	0.0017	2.7e-10	0.4932	C	A
rs12439798	chr15	46292589	T	G	0.0125	0.0017	6.9e-13	0.4228	G	T
rs3736485	chr15	51456413	G	A	-0.0134	0.0016	2.5e-16	0.5443	A	G
rs340025	chr15	60616108	C	T	0.0124	0.0017	1e-13	0.5724	T	C
rs8033510	chr15	61153315	C	T	-0.0106	0.0018	5.1e-09	0.6287	T	C
rs12595158	chr15	62023836	T	C	-0.0394	0.0054	1.9e-13	0.02362	C	T
rs11635675	chr15	63501039	G	T	-0.0124	0.0018	1.3e-11	0.3535	T	G
rs11629783	chr15	66449049	G	C	-0.0146	0.002	9.8e-13	0.2308	C	G
rs13329567	chr15	67812029	T	C	-0.0293	0.002	1e-50	0.2308	C	T
rs7164727	chr15	72801650	T	C	0.0182	0.0017	3.3e-25	0.681	C	T
rs11855853	chr15	77720276	T	C	-0.0145	0.002	2.4e-13	0.2649	C	T
rs12595749	chr15	79140017	G	A	-0.0141	0.0017	5.7e-16	0.4286	A	G
rs12593036	chr15	80766311	G	A	-0.0154	0.0019	3.8e-16	0.2993	A	G
rs12101393	chr15	92027691	G	C	-0.0127	0.0021	1.5e-09	0.2197	C	G
rs7181498	chr15	94728175	C	T	-0.0163	0.0018	1e-19	0.6309	T	C
rs11866815	chr16	337867	T	C	-0.0156	0.0019	1e-16	0.2461	C	T
rs2516739	chr16	2047157	A	G	-0.0159	0.0021	1.4e-14	0.2171	G	A
rs12448257	chr16	3549655	A	G	0.0184	0.002	8.1e-20	0.218	G	A
rs879620	chr16	3965728	T	C	0.0231	0.0018	5.3e-38	0.6179	C	T
rs10083803	chr16	6651399	C	T	0.0127	0.0019	5.9e-11	0.7395	T	C
rs977540	chr16	9630893	G	A	-0.014	0.0019	2.5e-13	0.2383	A	G
rs4985155	chr16	15035602	G	A	-0.012	0.0017	3e-12	0.3369	A	G
rs12446632	chr16	19924067	A	G	-0.0352	0.0024	2.9e-50	0.1424	G	A
rs868554	chr16	20039144	G	C	0.019	0.002	1.2e-20	0.2463	C	G
rs11074446	chr16	20243801	C	T	-0.0225	0.0024	1.8e-20	0.1306	T	C
rs9931967	chr16	20364029	G	T	-0.0163	0.0017	1e-20	0.4918	T	G
rs9927848	chr16	23821750	A	C	-0.0122	0.002	6.4e-10	0.7326	C	A
rs7195386	chr16	24567137	C	T	-0.0133	0.0017	1.1e-14	0.4986	T	C
rs1862451	chr16	24792299	G	A	-0.0137	0.0019	1.9e-12	0.2688	A	G
rs7187776	chr16	28846324	G	A	0.0265	0.0016	1.4e-58	0.4073	A	G
rs1057452	chr16	29822393	A	G	0.0173	0.0024	1.6e-12	0.03713	G	A
rs3814883	chr16	29983601	T	C	0.0232	0.0017	1.1e-40	0.4764	C	T
rs1549293	chr16	31130672	T	C	-0.0204	0.0017	7.6e-33	0.3596	C	T
rs2080454	chr16	49028679	A	C	-0.0129	0.0017	1.7e-14	0.6211	C	A
rs8047395	chr16	53764611	A	G	0.0642	0.0017	0	0.5061	G	A
rs11075986	chr16	53771432	G	C	-0.032	0.003	5.6e-26	0.0853	C	G
rs56094641	chr16	53772541	G	A	0.124386	0.0133001	8.57942e-21	0.12641	A	G
rs3751814	chr16	53784812	A	G	0.124725	0.0136291	5.62136e-20	0.11498	G	A
rs2075205	chr16	54119187	T	A	-0.0111	0.0017	1.8e-10	0.4134	A	T
rs11075489	chr16	62769937	T	C	-0.0111	0.0017	1.3e-10	0.4828	C	T
rs7200919	chr16	67282697	A	G	0.0095	0.0017	9.3e-09	0.4134	G	A
rs2307022	chr16	68348075	G	A	-0.0135	0.0017	5.5e-15	0.6656	A	G
rs889398	chr16	69522812	T	C	-0.0196	0.0016	1.3e-32	0.4247	C	T
rs7919	chr16	70480925	C	A	0.0158	0.0017	1e-19	0.5505	A	C
rs11642001	chr16	71865683	A	G	-0.0137	0.0021	5.1e-11	0.2121	G	A
rs756717	chr16	72962263	A	G	-0.0148	0.0017	5.4e-18	0.3973	G	A
rs825680	chr16	73572664	T	A	-0.0104	0.0018	6.7e-09	0.4173	A	T
rs6564360	chr16	76745715	G	A	0.0135	0.0022	1.2e-09	0.1905	A	G
rs12922346	chr16	82404732	C	G	0.0136	0.002	1e-11	0.2657	G	C
rs4783241	chr16	82616779	C	G	-0.0108	0.0017	4e-10	0.4938	G	C
rs7206608	chr16	82839023	G	C	0.0132	0.0019	1.3e-12	0.3146	C	G
rs4516268	chr17	1943537	A	C	-0.0217	0.0021	5.2e-25	0.1925	C	A
rs7217226	chr17	2232771	G	T	0.013	0.0017	2.6e-14	0.3596	T	G
rs1000940	chr17	5379957	G	A	0.0154	0.0018	1.1e-17	0.2987	A	G
rs17681708	chr17	9889555	C	T	0.0106	0.0018	7.2e-09	0.3123	T	C
rs1075901	chr17	16040596	C	T	0.0121	0.0016	1.2e-13	0.5639	T	C
rs4986044	chr17	21358248	T	C	-0.0164	0.0016	3.3e-23	0.4687	C	T
rs1038088	chr17	29747545	G	T	0.0117	0.0016	4.6e-13	0.5081	T	G
rs7211567	chr17	33133881	T	C	-0.0145	0.0021	4.5e-12	0.2201	C	T
rs8070454	chr17	40004501	T	C	-0.0098	0.0017	4.2e-09	0.3869	C	T
rs16966801	chr17	41417461	G	A	0.0156	0.0022	1.1e-12	0.2016	A	G
rs886444	chr17	47974545	A	G	-0.0102	0.0017	8.4e-10	0.3955	G	A
rs208015	chr17	48174984	C	T	-0.0356	0.0034	1.4e-25	0.9216	T	C
rs9299	chr17	48592068	T	C	0.0121	0.0018	3.6e-11	0.6471	C	T
rs11079849	chr17	49013423	T	C	-0.0188	0.0019	4.8e-24	0.3199	C	T
rs8071182	chr17	57258794	A	G	0.0133	0.0022	2.1e-09	0.1735	G	A
rs8075273	chr17	63651521	A	C	-0.0133	0.0018	3.7e-13	0.2815	C	A
rs12602912	chr17	67873957	T	C	0.0176	0.0021	9.9e-18	0.2048	C	T
rs2619976	chr17	73758406	T	C	0.0104	0.0018	6.3e-09	0.4132	C	T
rs8081039	chr17	77999748	T	C	0.0233	0.0038	6.1e-10	0.0573	C	T
rs1285245	chr17	79823090	C	G	-0.0121	0.0018	1.7e-11	0.3669	G	C
rs12939549	chr17	80637924	G	A	-0.018	0.0016	2.7e-28	0.4335	A	G
rs4889782	chr17	80666710	T	C	-0.015	0.0018	6.6e-17	0.6025	C	T
rs4969387	chr17	81107924	C	G	-0.0145	0.002	4.3e-13	0.7463	G	C
rs1608445	chr18	947953	A	G	-0.0104	0.0018	3.7e-09	0.435	G	A
rs8097544	chr18	1839563	G	A	0.02	0.0025	9.3e-16	0.1523	A	G
rs12964689	chr18	23537034	G	A	-0.0203	0.0017	5.1e-32	0.4824	A	G
rs1941697	chr18	33671312	A	G	0.0123	0.0017	1.2e-12	0.4538	G	A
rs1365466	chr18	38602476	T	C	-0.0137	0.0019	3.3e-13	0.7406	C	T
rs555267	chr18	43412733	T	G	0.0126	0.0017	6e-13	0.33	G	T
rs954018	chr18	45018498	A	G	-0.013	0.0018	2.1e-13	0.3053	G	A
rs10438964	chr18	45370664	T	C	-0.0127	0.0019	7.6e-11	0.2757	C	T
rs7239114	chr18	48394843	A	G	0.0124	0.0017	1.2e-13	0.5403	G	A
rs8092503	chr18	54812256	G	A	0.0165	0.0019	2.3e-17	0.2315	A	G
rs11659764	chr18	55668281	A	T	-0.0253	0.0039	8.9e-11	0.05297	T	A
rs7243357	chr18	59216087	G	T	-0.0194	0.0021	9.1e-20	0.1728	T	G
rs565239	chr18	60159965	A	G	0.0662732	0.0106167	4.31034e-10	0.19994	G	A
rs663129	chr18	60171168	A	G	0.0545	0.0019	1.6e-178	0.2301	G	A
rs8094523	chr18	60210922	A	G	-0.0305	0.0032	4.7e-22	0.08016	G	A
rs9675376	chr18	60302011	A	G	0.035	0.0018	2.7e-82	0.2877	G	A
rs2229616	chr18	60372043	T	C	-0.106	0.0059	4.7e-71	0.02017	C	T
rs9951893	chr18	63072017	C	T	0.0115	0.0017	3.3e-11	0.4751	T	C
rs2012927	chr18	65630436	G	A	-0.0129	0.0017	7.4e-14	0.6652	A	G
rs8089514	chr18	71557242	A	T	0.0126	0.0019	1.1e-11	0.359	T	A
rs11150911	chr18	75786573	C	A	-0.0133	0.0018	4.7e-13	0.7191	A	C
rs1787267	chr18	78982544	C	G	-0.0237	0.0036	3.4e-11	0.06268	G	C
rs12609744	chr19	12883326	C	T	0.0126	0.0019	3.6e-11	0.3069	T	C
rs273504	chr19	18104437	G	A	0.0153	0.0018	4.4e-18	0.4266	A	G
rs17724992	chr19	18344015	G	A	-0.0183	0.0019	1e-22	0.2596	A	G
rs998732	chr19	19267862	G	A	-0.0171	0.0022	2e-14	0.1578	A	G
rs2304130	chr19	19678719	G	A	-0.0176	0.003	2.9e-09	0.0853	A	G
rs8102137	chr19	29805946	C	T	0.0193	0.0018	1.7e-25	0.3237	T	C
rs2866816	chr19	30192972	C	T	-0.0129	0.002	5.6e-11	0.2607	T	C
rs11668301	chr19	30525289	G	A	-0.021	0.0024	1.9e-18	0.1518	A	G
rs10408013	chr19	33472860	T	C	0.0111	0.0018	8e-10	0.2908	C	T
rs29938	chr19	33820576	C	T	0.015	0.0017	6.7e-18	0.6725	T	C
rs3826705	chr19	42133080	C	T	0.0157	0.0027	6.6e-09	0.1206	T	C
rs3810291	chr19	47065746	A	G	0.0274	0.0018	2.1e-52	0.6703	G	A
rs1884389	chr20	1429938	T	C	-0.0103	0.0017	4e-09	0.4289	C	T
rs676749	chr20	3045423	A	T	-0.0104	0.0017	1.7e-09	0.502	T	A
rs1884897	chr20	6632185	G	A	0.0194	0.0017	1.3e-30	0.6308	A	G
rs8123881	chr20	15838850	G	A	0.0196	0.0024	4.4e-16	0.1299	A	G
rs6138482	chr20	25078806	T	C	0.0147	0.002	5.8e-13	0.1974	C	T
rs6121381	chr20	32197790	T	A	0.0147	0.0024	9.4e-10	0.1531	A	T
rs6142096	chr20	34098852	A	G	0.0137	0.0017	1.8e-15	0.5278	G	A
rs2143253	chr20	43358752	A	G	-0.0188	0.0026	1.1e-12	0.1189	G	A
rs2425857	chr20	46285495	G	A	-0.0116	0.0017	2.8e-11	0.5591	A	G
rs6019482	chr20	48879023	T	C	-0.0178	0.0023	2.8e-14	0.1654	C	T
rs17806379	chr20	52490751	T	C	-0.0258	0.0022	1.5e-30	0.1789	C	T
rs1512065	chr20	54836787	G	A	-0.0138	0.0021	5.7e-11	0.7629	A	G
rs559267	chr20	55582439	G	A	0.0115	0.0017	3e-11	0.3358	A	G
rs6011457	chr20	62899563	A	T	-0.0116	0.0017	2.7e-11	0.4975	T	A
rs762147	chr21	37866307	G	A	0.0115	0.0019	3.3e-09	0.7292	A	G
rs13047416	chr21	38937512	G	C	-0.0154	0.0018	2.2e-17	0.3769	C	G
rs2836961	chr21	39255094	C	A	0.0102	0.0017	1.1e-09	0.3835	A	C
rs2838006	chr21	41281640	C	T	0.0126	0.0018	5.4e-12	0.6383	T	C
rs427943	chr21	45150981	C	A	0.017	0.0017	7.3e-23	0.5669	A	C
rs4820408	chr22	40208941	G	T	-0.0151	0.0017	2.1e-19	0.592	T	G
rs9615905	chr22	48479887	T	C	0.011	0.0017	2.7e-10	0.45	C	T
