# Supplementary material for: Whole genome sequencing and analysis of 4,053 individuals in trios and mother-infant duos from the Born in Guangzhou Cohort Study
Source: Research Square preprint supplement (doi:10.21203/rs.3.rs-1732885/v1), 2022-06-10
Supplement: Supplementary file 8 [file 6df55d545dd2c27808665a69.xlsx]

## Sheet: Sheet1
Table S7. GWAS SNPs used to calculate the PRS for height (POS: GRCh38 coordinate; A: Effect allele)
SNP	CHR	POS	A	B	Beta	SE	P value	ALT allele frequency	REF	ALT
rs385039	chr1	2145970	G	A	0.0205	0.0016	9.2e-38	0.2805	A	G
rs12743493	chr1	2293397	A	G	0.0139	0.0016	4.9e-19	0.3761	G	A
rs16823193	chr1	2931420	T	A	0.0112	0.0016	1.1e-11	0.2613	A	T
rs10909940	chr1	3400192	A	G	0.0113	0.0015	5.8e-14	0.3487	G	A
rs17404435	chr1	3849722	T	G	-0.0091	0.0015	2.6e-09	0.6826	G	T
rs12046884	chr1	6534501	A	G	-0.015	0.0022	2.9e-11	0.1104	G	A
rs28624	chr1	8024295	C	A	0.0164	0.0018	6.4e-19	0.1758	A	C
rs11581328	chr1	8447713	A	G	0.0158	0.0018	2.2e-18	0.2219	G	A
rs743973	chr1	9200841	C	A	-0.0116	0.0015	5e-15	0.3925	A	C
rs2239560	chr1	9244672	A	G	0.0269	0.002	1e-39	0.1511	G	A
rs11590326	chr1	9279146	G	A	0.0156	0.0016	2.7e-22	0.7243	A	G
rs17393468	chr1	9378481	C	T	-0.0124	0.0019	1.2e-10	0.1742	T	C
rs10157778	chr1	9482553	A	G	0.014	0.0015	2.2e-21	0.3732	G	A
rs17396340	chr1	10226118	A	G	0.025	0.0021	9.5e-32	0.1272	G	A
rs742824	chr1	11213965	A	G	-0.019	0.0016	6.1e-34	0.7072	G	A
rs164867	chr1	13542032	G	A	-0.0118	0.0018	4.8e-11	0.7975	A	G
rs1739843	chr1	16016759	C	T	0.0092	0.0014	2.4e-10	0.5955	T	C
rs2284746	chr1	16980180	G	C	0.0614634	0.0106788	8.63107e-09	0.2651	C	G
rs1472565	chr1	19428536	C	T	-0.0187	0.0014	1.3e-39	0.4592	T	C
rs212525	chr1	21258092	G	A	0.0207	0.0014	2.5e-46	0.5931	A	G
rs3121206	chr1	21581111	A	G	0.0108	0.0018	3.2e-09	0.7988	G	A
rs6688119	chr1	21944414	T	C	-0.0123	0.0015	2.2e-16	0.6142	C	T
rs7542242	chr1	22151000	T	C	-0.0202	0.0016	2.8e-38	0.3345	C	T
rs12734979	chr1	22196434	C	T	0.0155	0.0017	1.7e-20	0.2518	T	C
rs1571466	chr1	23122690	C	T	-0.0191	0.0014	3.8e-41	0.4412	T	C
rs16829945	chr1	24713824	T	C	-0.0126	0.0016	1.2e-14	0.2577	C	T
rs10903108	chr1	24862449	T	G	0.0146	0.0015	3.1e-22	0.3386	G	T
rs2135756	chr1	24952689	T	C	-0.0098	0.0014	7.6e-12	0.5053	C	T
rs4644442	chr1	24975422	T	C	0.0125	0.0021	3.8e-09	0.1317	C	T
rs11248974	chr1	25052022	T	C	0.0177	0.0016	3.2e-29	0.276	C	T
rs926438	chr1	25427147	T	C	0.0107	0.0014	5.5e-14	0.5584	C	T
rs17163588	chr1	26123518	T	C	0.0264	0.0019	5.8e-46	0.1812	C	T
rs2219320	chr1	26476939	C	T	-0.0255	0.0016	2.4e-54	0.2577	T	C
rs12735646	chr1	26751875	A	G	0.0231	0.0026	5e-19	0.07595	G	A
rs17340752	chr1	28744344	G	A	0.0148	0.0017	6.1e-18	0.2332	A	G
rs2292989	chr1	31670172	G	A	-0.015	0.0015	8.2e-24	0.3562	A	G
rs684484	chr1	31905536	G	C	0.0315	0.0021	1.7e-51	0.1386	C	G
rs4653017	chr1	33311127	T	C	0.0135	0.0015	9.6e-19	0.6818	C	T
rs12116935	chr1	36323945	G	A	-0.0122	0.0015	1e-16	0.3818	A	G
rs7544462	chr1	37497155	C	A	-0.0299	0.0026	2.5e-31	0.08092	A	C
rs4072980	chr1	37990434	A	G	0.02	0.0015	3.5e-42	0.418	G	A
rs2275767	chr1	39479625	T	C	-0.0107	0.0015	1e-12	0.6555	C	T
rs11207870	chr1	40324255	T	C	-0.0255	0.0018	2.1e-43	0.1749	C	T
rs6678816	chr1	41019917	T	G	0.0399	0.0017	4.1e-119	0.2184	G	T
rs11209799	chr1	41289884	G	T	-0.0199	0.0014	2.7e-43	0.4615	T	G
rs349427	chr1	41779410	C	T	0.0098	0.0014	6.2e-12	0.5692	T	C
rs2786481	chr1	41875994	G	T	-0.0209	0.0019	1.6e-28	0.821	T	G
rs2297976	chr1	42949794	T	G	0.0115	0.0019	8.8e-10	0.1836	G	T
rs2782641	chr1	43547684	A	G	-0.0114	0.0015	8.4e-15	0.6118	G	A
rs3014216	chr1	45570088	T	A	-0.0165	0.0014	4e-31	0.4827	A	T
rs564914	chr1	47449561	T	A	0.0209	0.0014	4.5e-47	0.3961	A	T
rs72900922	chr1	50629523	A	G	0.0993671	0.0149159	2.7045e-11	0.08983	G	A
rs12855	chr1	50974421	T	C	0.0436	0.0025	1.4e-68	0.09255	C	T
rs6672470	chr1	52619665	T	C	0.0172	0.003	5.5e-09	0.0687	C	T
rs7523761	chr1	52785243	C	T	0.0107	0.0014	8.5e-14	0.4119	T	C
rs12096165	chr1	53052377	G	T	-0.0247	0.0033	1.6e-13	0.05268	T	G
rs1288380	chr1	53116300	G	C	0.0187	0.0018	3.8e-25	0.1986	C	G
rs17387330	chr1	53653905	A	G	0.0155	0.0015	1.5e-24	0.3237	G	A
rs4244644	chr1	54417490	T	C	-0.0151	0.0014	1.8e-26	0.4798	C	T
rs6691924	chr1	54488572	T	C	0.0278	0.0023	5.2e-34	0.8873	C	T
rs6666716	chr1	54861819	T	C	0.0104	0.0016	1.1e-10	0.7281	C	T
rs709397	chr1	55624650	T	C	-0.0103	0.0014	4.9e-13	0.5244	C	T
rs778417	chr1	56178895	C	T	0.0187	0.0017	7e-28	0.2191	T	C
rs1361823	chr1	56524727	A	G	-0.0106	0.0017	7.6e-10	0.2151	G	A
rs3015321	chr1	58840324	G	A	0.0097	0.0015	1.2e-10	0.3365	A	G
rs835362	chr1	59348208	A	G	0.0131	0.0021	8.2e-10	0.1189	G	A
rs12067831	chr1	63395342	G	T	-0.0089	0.0015	4.1e-09	0.3273	T	G
rs17497947	chr1	66991516	T	G	-0.02	0.0017	2e-30	0.2001	G	T
rs11209745	chr1	71072260	G	A	0.0148	0.0016	2.5e-20	0.2639	A	G
rs6691430	chr1	72649522	A	G	0.0104	0.0016	2.3e-10	0.255	G	A
rs7545219	chr1	76061833	C	T	-0.0108	0.0015	1.3e-13	0.6034	T	C
rs12035349	chr1	77091654	G	A	0.0169	0.0022	1.5e-14	0.1295	A	G
rs17391694	chr1	78157942	T	C	0.0343	0.0021	1.3e-57	0.1189	C	T
rs12743049	chr1	85431703	A	G	-0.0154	0.0017	7.1e-19	0.2084	G	A
rs11161635	chr1	85543257	C	T	0.0131	0.0017	3.4e-15	0.2449	T	C
rs1842579	chr1	85823399	T	C	-0.0139	0.0014	4.3e-22	0.4375	C	T
rs12076366	chr1	86155770	G	T	-0.0198	0.0025	1.5e-15	0.08711	T	G
rs17363646	chr1	86357820	G	A	0.0136	0.002	2.8e-11	0.1419	A	G
rs1002436	chr1	88681169	G	A	0.0266	0.0014	1e-76	0.5632	A	G
rs7525985	chr1	88995265	T	C	-0.0126	0.0014	2.7e-18	0.4456	C	T
rs12032393	chr1	89713973	G	A	0.0119	0.002	5e-09	0.1442	A	G
rs6662366	chr1	90765252	G	A	-0.0094	0.0016	1.3e-09	0.3041	A	G
rs12076549	chr1	91736142	C	A	-0.0096	0.0015	4.6e-11	0.5905	A	C
rs284182	chr1	91763088	A	G	-0.0147	0.0019	7.7e-15	0.8209	G	A
rs2025607	chr1	92424787	T	C	-0.0224	0.0018	3.6e-36	0.2022	C	T
rs945631	chr1	92960610	A	G	0.0404	0.0039	9.7e-26	0.04362	G	A
rs1327589	chr1	101925146	A	G	0.0087	0.0014	1.5e-09	0.4477	G	A
rs12144747	chr1	102763929	C	T	0.014	0.0018	8.3e-15	0.1955	T	C
rs7517682	chr1	103054033	A	G	-0.0241	0.0014	7.4e-63	0.5778	G	A
rs12740374	chr1	109274968	T	G	0.0159	0.0017	1.4e-20	0.2246	G	T
rs12130243	chr1	112627045	G	T	-0.0228	0.0017	4.5e-39	0.198	T	G
rs1321666	chr1	117949429	C	T	0.0105	0.0014	1.7e-13	0.4867	T	C
rs17038164	chr1	118320046	C	T	-0.0419	0.0016	4.7e-146	0.2457	T	C
rs10923672	chr1	118764243	G	C	0.0143	0.002	3.5e-13	0.1584	C	G
rs10923724	chr1	119004219	T	C	0.0119	0.0014	1.7e-16	0.5725	C	T
rs12144094	chr1	119722200	G	C	-0.0278	0.002	9.3e-44	0.1622	C	G
rs11576360	chr1	147268917	A	G	0.0237	0.0021	1.3e-28	0.8747	A	G
rs6695965	chr1	147588292	T	C	0.0185	0.0024	8.4e-15	0.8932	T	C
rs267738	chr1	150968149	G	T	-0.0115	0.0017	2.3e-11	0.2095	T	G
rs6690662	chr1	151016485	T	C	0.0142	0.0016	2e-18	0.7447	C	T
rs2298265	chr1	151286567	T	C	-0.0265	0.0023	9.1e-32	0.1161	C	T
rs11204828	chr1	151485717	T	C	0.0137	0.0019	1.3e-12	0.8264	C	T
rs3811418	chr1	151832573	G	A	0.0146	0.0021	9.2e-12	0.1203	A	G
rs9426902	chr1	153746270	A	G	-0.0114	0.0014	2.9e-15	0.4211	G	A
rs962242	chr1	154619664	C	T	0.014	0.0017	2e-16	0.226	T	C
rs7523890	chr1	154649758	C	T	0.0113	0.0019	4.7e-09	0.1717	T	C
rs905938	chr1	155018913	C	T	0.0191	0.0016	1.7e-31	0.2675	T	C
rs476000	chr1	156136578	A	G	0.0245	0.0029	2.2e-17	0.06887	G	A
rs12136856	chr1	156503322	G	C	-0.0122	0.0015	3.5e-16	0.6653	C	G
rs1572416	chr1	156982262	A	C	-0.0119	0.0018	1.3e-10	0.1748	C	A
rs12744299	chr1	160422364	G	A	-0.0114	0.0016	5.7e-13	0.2902	A	G
rs6697469	chr1	162688983	G	C	0.0175	0.0024	5.9e-13	0.09127	C	G
rs4147594	chr1	165631369	T	C	-0.0093	0.0014	9.8e-11	0.4788	C	T
rs4657698	chr1	167710161	C	T	0.0192	0.0031	8.1e-10	0.05081	T	C
rs12744534	chr1	170689214	G	A	0.0227	0.0022	1.5e-25	0.1291	A	G
rs10919470	chr1	170793539	A	G	0.0171	0.0015	1.3e-28	0.3016	G	A
rs17350579	chr1	172097452	T	G	0.0373	0.0016	1.7e-121	0.2843	G	T
rs12075079	chr1	172250855	G	A	0.045	0.0017	9e-149	0.2122	A	G
rs2255707	chr1	172285637	A	G	-0.0321	0.0039	2.2e-16	0.03771	G	A
rs17369123	chr1	172386701	T	C	0.0269	0.0018	1.6e-49	0.1819	C	T
rs6690229	chr1	175117325	G	A	-0.0084	0.0015	7.9e-09	0.6	A	G
rs12028567	chr1	176409692	C	T	0.0118	0.0014	3.2e-16	0.4176	T	C
rs4233168	chr1	176530924	T	A	-0.0289	0.0028	1.1e-25	0.92721	A	T
rs12140861	chr1	176718919	C	A	-0.0405	0.0036	9.1e-29	0.03116	A	C
rs1014719	chr1	176833630	T	G	0.0281	0.0014	1.5e-86	0.5591	G	T
rs12094387	chr1	176850739	C	T	-0.0148	0.0017	1.8e-17	0.2036	T	C
rs410589	chr1	179262942	G	A	0.0106	0.0015	5.9e-12	0.3081	A	G
rs3795503	chr1	180936558	T	C	0.0162	0.0016	2.2e-24	0.3216	C	T
rs10797829	chr1	183064093	G	A	-0.019	0.0014	3.1e-40	0.5351	A	G
rs10797923	chr1	183932832	C	T	0.0122	0.0015	3.6e-15	0.3031	T	C
rs2986559	chr1	183980046	G	A	0.0211	0.0018	3.4e-30	0.8309	A	G
rs3814333	chr1	184037985	T	C	0.0456	0.0015	4e-192	0.3129	C	T
rs1938376	chr1	198182013	G	A	-0.0169	0.0025	1.3e-11	0.0939	A	G
rs7528943	chr1	199828487	T	C	0.0119	0.0014	2e-16	0.5859	C	T
rs2737662	chr1	200086739	G	T	0.0097	0.0014	8.5e-12	0.4884	T	G
rs2816991	chr1	200178466	G	C	0.0123	0.0016	3.9e-15	0.7033	C	G
rs7354862	chr1	200296217	T	C	0.0093	0.0015	1.3e-09	0.6699	C	T
rs239980	chr1	201752974	T	C	-0.0114	0.0019	7.1e-10	0.8119	C	T
rs4951022	chr1	203815865	C	T	0.015	0.0016	2.4e-21	0.2729	T	C
rs823114	chr1	205750404	A	G	-0.0182	0.0014	1.7e-37	0.5458	G	A
rs4844620	chr1	207807556	A	G	0.0107	0.0017	8.5e-10	0.2233	G	A
rs2970592	chr1	212047505	A	G	0.0151	0.0014	1.3e-25	0.5923	G	A
rs351376	chr1	212252830	G	C	-0.0135	0.0014	9.8e-21	0.588	C	G
rs6540832	chr1	214453796	A	G	-0.0221	0.0015	7.3e-50	0.3982	G	A
rs10494981	chr1	214548632	G	C	-0.0215	0.003	5.3e-13	0.0642	C	G
rs10864136	chr1	214865244	A	G	-0.0126	0.0015	2.5e-17	0.4098	G	A
rs1397180	chr1	217848320	G	A	0.0121	0.0014	7e-17	0.447	A	G
rs6658835	chr1	218347653	G	A	0.0214	0.0016	4e-40	0.2642	A	G
rs991967	chr1	218442109	C	A	0.0368	0.0016	2.9e-122	0.284	A	C
rs17571465	chr1	218717316	T	A	0.0217	0.0029	4e-14	0.06747	A	T
rs2378017	chr1	218789800	A	G	-0.0212	0.0015	2.4e-43	0.315	G	A
rs11118178	chr1	218930884	T	C	-0.0153	0.002	7.9e-15	0.1622	C	T
rs17526679	chr1	219380975	A	G	0.0131	0.0022	3.6e-09	0.117	G	A
rs10779365	chr1	219614165	T	A	-0.0179	0.0014	2.5e-36	0.4566	A	T
rs17551179	chr1	219795875	T	C	-0.0109	0.0018	6.4e-10	0.1986	C	T
rs2807848	chr1	220837171	G	T	0.0095	0.0015	4.8e-10	0.324	T	G
rs4595370	chr1	221124780	A	G	0.0194	0.0015	8.2e-36	0.3016	G	A
rs10916617	chr1	224449368	T	C	-0.0221	0.0017	1.2e-37	0.2177	C	T
rs2615075	chr1	225746593	G	A	0.0098	0.0015	3.1e-11	0.3746	A	G
rs12081061	chr1	227338059	G	A	0.0134	0.0016	3.7e-16	0.2575	A	G
rs3014276	chr1	227399381	G	C	-0.0253	0.0016	3.3e-56	0.2615	C	G
rs12120182	chr1	227626631	A	G	-0.0379	0.0018	1.6e-98	0.1832	G	A
rs3820623	chr1	227919561	A	G	-0.0149	0.0018	3.3e-16	0.187	G	A
rs11585206	chr1	228689101	T	C	-0.0112	0.0018	8.4e-10	0.1858	C	T
rs11122624	chr1	230931490	T	C	0.0102	0.0014	6.5e-13	0.5148	C	T
rs7541554	chr1	234627519	G	A	0.012	0.0015	8.3e-16	0.3386	A	G
rs946027	chr1	235182971	C	T	-0.0144	0.0015	9.4e-22	0.3492	T	C
rs10926168	chr1	240213231	G	A	0.0093	0.0014	1.1e-10	0.3994	A	G
rs4658574	chr1	243487414	C	T	0.0159	0.0017	5.6e-21	0.2275	T	C
rs10205435	chr2	230442	C	T	0.016	0.0015	5.6e-25	0.6916	T	C
rs17038954	chr2	1641901	T	C	0.03	0.003	4.7e-24	0.06688	C	T
rs736870	chr2	1744930	C	T	0.0158	0.0016	1.1e-22	0.2728	T	C
rs10206204	chr2	5685791	T	G	-0.0097	0.0014	2.4e-11	0.5833	G	T
rs3922853	chr2	5690467	A	C	-0.0159	0.0019	2.1e-16	0.1728	C	A
rs12623864	chr2	6280913	A	G	0.0105	0.0014	2.4e-13	0.5419	G	A
rs12475630	chr2	9494252	T	C	0.0155	0.0015	8.7e-24	0.3086	C	T
rs3885668	chr2	10038352	T	C	-0.022	0.0014	9.9e-53	0.5714	C	T
rs6705170	chr2	11362530	G	A	-0.0106	0.0014	1.4e-13	0.5682	A	G
rs2304402	chr2	11634198	A	G	0.0083	0.0014	8.9e-09	0.5027	G	A
rs6432244	chr2	11989203	C	T	-0.0142	0.0015	6.1e-21	0.3668	T	C
rs300152	chr2	17805416	T	G	-0.0129	0.0018	8.8e-13	0.2074	G	T
rs3761715	chr2	18401745	C	T	-0.0138	0.0018	4e-14	0.1843	T	C
rs9677265	chr2	18514065	G	A	-0.0088	0.0015	5.8e-09	0.3696	A	G
rs13398721	chr2	19429543	C	T	-0.0159	0.0021	3.1e-14	0.1354	T	C
rs6732272	chr2	19843056	T	C	-0.0114	0.0014	2.1e-15	0.4129	C	T
rs12233028	chr2	20070385	A	G	-0.0271	0.0022	9.3e-35	0.1249	G	A
rs10179429	chr2	20324589	T	C	0.0258	0.0037	5e-12	0.04391	C	T
rs10495709	chr2	20728282	C	T	0.0101	0.0016	2.6e-10	0.2638	T	C
rs13386930	chr2	23648154	A	G	0.0168	0.0021	4.7e-15	0.1467	G	A
rs4665628	chr2	23671474	A	T	0.0308	0.002	1.1e-53	0.8485	T	A
rs2551337	chr2	23784016	T	C	-0.0232	0.0019	9e-36	0.178	C	T
rs925229	chr2	24011570	G	A	0.0293	0.0014	6.6e-92	0.4456	A	G
rs17046434	chr2	24649594	T	C	-0.0236	0.0028	4e-17	0.07314	C	T
rs12713362	chr2	24652241	A	C	-0.0155	0.0016	1.8e-23	0.6953	C	A
rs10182181	chr2	24927427	G	A	-0.0346	0.0014	1.2e-131	0.4753	A	G
rs2289195	chr2	25240614	A	G	0.0375	0.0014	2.5e-148	0.4149	G	A
rs17047143	chr2	25795020	C	G	-0.0184	0.0027	2.2e-11	0.07606	G	C
rs3914571	chr2	25818600	C	T	-0.0094	0.0014	3.7e-11	0.5095	T	C
rs1260326	chr2	27508073	C	T	0.0205	0.0014	3.1e-45	0.5973	T	C
rs6705961	chr2	28102334	T	C	0.0116	0.0014	1.3e-15	0.4278	C	T
rs4666070	chr2	28401966	G	A	0.0118	0.0014	1.2e-16	0.4728	A	G
rs17428810	chr2	32510976	C	T	-0.0102	0.0015	4.7e-11	0.3119	T	C
rs2008845	chr2	33038840	G	T	-0.0147	0.0015	2.6e-21	0.3022	T	G
rs219123	chr2	33093442	G	C	0.015	0.0023	7.2e-11	0.8929	C	G
rs4670893	chr2	33135781	C	G	0.0309	0.0016	1.4e-83	0.7146	G	C
rs6743685	chr2	33164528	C	A	0.0211	0.0014	3.8e-49	0.5228	A	C
rs877672	chr2	33276560	C	A	-0.0164	0.0014	8.5e-31	0.5139	A	C
rs4627543	chr2	33590881	C	T	-0.0145	0.0018	2.3e-16	0.2137	T	C
rs711245	chr2	36541732	A	G	-0.0236	0.0015	6.2e-54	0.3279	G	A
rs10181664	chr2	36556072	T	C	0.0191	0.0015	8.1e-36	0.3119	C	T
rs2058717	chr2	37422219	G	A	-0.0113	0.0019	1.5e-09	0.1801	A	G
rs17511102	chr2	37733470	T	A	0.0456	0.0025	5.3e-72	0.08717	A	T
rs6706045	chr2	37888051	C	T	0.0099	0.0015	1.4e-11	0.3872	T	C
rs9309037	chr2	39329643	T	C	-0.0122	0.0019	2.9e-10	0.8413	C	T
rs11675643	chr2	40627755	T	G	-0.0089	0.0014	4.1e-10	0.5282	G	T
rs6728179	chr2	41954923	C	T	-0.0129	0.0017	1.6e-13	0.2219	T	C
rs222486	chr2	42422524	T	C	-0.0233	0.0021	2.5e-28	0.1336	C	T
rs2004578	chr2	42919718	C	A	-0.0091	0.0014	2.9e-10	0.4383	A	C
rs4952672	chr2	43195418	A	G	0.009	0.0014	4.7e-10	0.4906	G	A
rs6726917	chr2	43526774	C	A	0.0206	0.0023	2.2e-19	0.1077	A	C
rs7602070	chr2	44161475	A	G	-0.0296	0.0018	2.3e-60	0.7968	G	A
rs17390720	chr2	44725115	G	C	-0.0178	0.0016	1.2e-27	0.2671	C	G
rs343971	chr2	44731375	T	C	0.0201	0.0019	3.7e-25	0.1625	C	T
rs10205197	chr2	45474976	C	G	-0.0195	0.0026	3.3e-14	0.0825	G	C
rs12999972	chr2	45947279	C	T	0.0096	0.0015	5.6e-10	0.6914	T	C
rs12474201	chr2	46694146	A	G	0.0263	0.0015	1.1e-70	0.3545	G	A
rs6740539	chr2	46777649	T	G	-0.0221	0.0015	6.1e-46	0.3103	G	T
rs940737	chr2	47061262	C	G	-0.0152	0.0018	6e-17	0.8092	G	C
rs3811522	chr2	48440605	C	G	0.0111	0.0018	1.6e-09	0.1805	G	C
rs2567842	chr2	54714814	A	G	-0.0131	0.0014	2.5e-20	0.4707	G	A
rs2116491	chr2	54847841	A	G	0.0182	0.0027	1.6e-11	0.92604	G	A
rs10169395	chr2	55401800	C	G	-0.01	0.0015	7.2e-11	0.3121	G	C
rs17369434	chr2	55777261	G	A	0.048	0.0027	2.1e-68	0.06922	A	G
rs13409792	chr2	55807028	G	A	0.0297	0.0021	2.7e-47	0.1383	A	G
rs7571341	chr2	55843927	A	G	0.0218	0.0029	9.5e-14	0.06659	G	A
rs3791679	chr2	55869757	G	A	-0.0666	0.0017	0	0.2409	A	G
rs72924526	chr2	55889460	C	T	0.0867135	0.0155279	2.34552e-08	0.12149	T	C
rs11900078	chr2	55953001	G	C	0.0447	0.0026	7.3e-68	0.08975	C	G
rs2194701	chr2	59910058	T	C	-0.0136	0.0014	2.6e-21	0.5565	C	T
rs10189857	chr2	60486100	G	A	-0.0106	0.0014	1.8e-13	0.4339	A	G
rs11892786	chr2	60833472	C	G	-0.0145	0.0023	2.3e-10	0.1147	G	C
rs10496091	chr2	61255126	A	G	-0.0143	0.0016	1e-19	0.2867	G	A
rs12990348	chr2	64300470	A	T	-0.0117	0.0017	3.9e-12	0.2285	T	A
rs1370394	chr2	65453176	G	T	0.0091	0.0015	1.5e-09	0.3382	T	G
rs702942	chr2	65529831	A	G	0.0142	0.0015	2.4e-21	0.3514	G	A
rs6749629	chr2	67412414	T	A	0.0095	0.0016	6.1e-09	0.7333	A	T
rs11679294	chr2	67880737	T	C	0.0089	0.0015	2.1e-09	0.3713	C	T
rs17035043	chr2	68153052	G	C	-0.0292	0.0027	8.6e-28	0.07829	C	G
rs2120335	chr2	68267870	A	G	-0.0148	0.0015	2.8e-24	0.3972	G	A
rs4627609	chr2	68653304	C	T	0.0088	0.0015	4e-09	0.3665	T	C
rs10198416	chr2	69144502	G	A	0.0147	0.0016	5.3e-20	0.2659	A	G
rs7571713	chr2	70014082	A	G	-0.0239	0.0031	2e-14	0.05391	G	A
rs2900805	chr2	71231337	C	G	-0.0492635	0.00882964	2.41443e-08	0.57083	C	G
rs4852777	chr2	71307031	C	G	-0.0297	0.0014	1e-93	0.5945	G	C
rs6719073	chr2	71558813	G	C	-0.0166	0.0015	9.9e-27	0.6581	C	G
rs4417739	chr2	71731173	G	A	0.0148	0.0015	2.7e-23	0.3423	A	G
rs7575536	chr2	72109844	T	G	0.0309	0.004	1.3e-14	0.03461	G	T
rs4852902	chr2	72862872	G	A	-0.0178	0.0023	1.7e-14	0.9002	A	G
rs1050146	chr2	73901306	T	C	-0.0126	0.0018	8.8e-13	0.7857	C	T
rs14976	chr2	85591763	T	C	0.0169	0.0015	9.2e-28	0.2911	C	T
rs7596717	chr2	86539089	A	C	0.0092	0.0015	2.6e-10	0.6275	C	A
rs867529	chr2	88613755	C	G	0.0304	0.0016	1.5e-83	0.2736	G	C
rs13014679	chr2	96667755	C	A	-0.0333	0.0033	5.6e-24	0.04549	A	C
rs6746896	chr2	96745212	G	A	-0.0089	0.0015	4.3e-09	0.3321	A	G
rs7586377	chr2	101681520	C	T	0.0109	0.0015	1.8e-12	0.6873	T	C
rs7568278	chr2	104320087	G	A	-0.022	0.0031	1.3e-12	0.05659	A	G
rs6739701	chr2	104515874	G	A	0.0151	0.0015	2.9e-25	0.4299	A	G
rs1159965	chr2	104865027	G	A	-0.0094	0.0015	5.7e-10	0.6454	A	G
rs4640402	chr2	105382552	C	A	0.0123	0.0014	1.2e-17	0.4111	A	C
rs12996345	chr2	106114120	T	A	0.0192	0.002	2.9e-21	0.1479	A	T
rs10203795	chr2	108439261	T	C	0.0118	0.0014	3.8e-16	0.4053	C	T
rs17269605	chr2	109100638	C	T	0.0172	0.0028	7.3e-10	0.07162	T	C
rs3789131	chr2	110927840	T	C	-0.0098	0.0015	4.4e-11	0.3415	C	T
rs3789068	chr2	111151670	G	A	0.012	0.0014	2.8e-17	0.4778	A	G
rs6542180	chr2	113896294	T	A	0.0113	0.0015	1.4e-14	0.6302	A	T
rs2422241	chr2	118285460	A	G	-0.0084	0.0014	6.1e-09	0.5807	G	A
rs3111726	chr2	119908079	A	G	0.0096	0.0015	2.3e-10	0.3233	G	A
rs17005238	chr2	120817714	T	C	-0.0369	0.0032	4.9e-30	0.06203	C	T
rs71424363	chr2	120851419	A	G	-0.0869655	0.0154069	1.65584e-08	0.1073	G	A
rs2166898	chr2	120855084	A	G	-0.0303	0.0019	1.8e-56	0.1643	G	A
rs6753288	chr2	127412323	A	G	0.0101	0.0014	2.9e-12	0.4339	G	A
rs10803593	chr2	128097051	C	T	-0.0148	0.0014	4.7e-25	0.5775	T	C
rs7586881	chr2	128296292	A	T	-0.0117	0.0014	3.6e-16	0.4815	T	A
rs4369918	chr2	133731428	A	C	-0.0146	0.0018	1.8e-15	0.1736	C	A
rs1584239	chr2	133736071	C	T	0.0205	0.002	8.1e-25	0.1484	T	C
rs9798267	chr2	135372221	G	A	-0.0259	0.0027	1.3e-21	0.08939	A	G
rs6755392	chr2	144484555	G	A	-0.0106	0.0015	3.3e-12	0.6924	A	G
rs17236969	chr2	155895947	T	C	0.012	0.002	1.9e-09	0.1605	C	T
rs7589499	chr2	156286797	G	A	0.0116	0.0018	3.6e-10	0.1875	A	G
rs7561404	chr2	156608258	T	C	-0.0098	0.0016	3.4e-10	0.2998	C	T
rs448513	chr2	159108040	C	T	-0.01	0.0015	5.5e-11	0.3175	T	C
rs7425274	chr2	160346884	C	T	0.0124	0.0014	4.2e-18	0.4467	T	C
rs16848690	chr2	163600129	T	C	-0.0184	0.0024	1.1e-14	0.09904	C	T
rs2060199	chr2	165340171	A	T	0.0082	0.0014	9.1e-09	0.5622	T	A
rs494120	chr2	168814219	T	C	-0.0152	0.0024	1.9e-10	0.1037	C	T
rs540652	chr2	168850918	T	C	0.0231	0.0014	8.4e-60	0.4668	C	T
rs12993143	chr2	168862990	G	T	-0.0138	0.0014	2.8e-22	0.4518	T	G
rs3770433	chr2	171017514	G	A	0.0176	0.0015	1e-32	0.618	A	G
rs6722670	chr2	171316354	A	G	-0.0228	0.0016	3e-46	0.7145	G	A
rs6433300	chr2	171607498	T	C	0.0154	0.0017	8.5e-20	0.2374	C	T
rs6433457	chr2	173951628	A	G	-0.0189	0.0016	1.8e-30	0.246	G	A
rs711812	chr2	176099576	A	C	0.0105	0.0015	4.2e-12	0.3323	C	A
rs6726253	chr2	177783882	C	T	0.0143	0.0015	1.2e-20	0.3026	T	C
rs12464787	chr2	178575302	A	G	-0.0121	0.0015	2.6e-15	0.3038	G	A
rs12993099	chr2	178733501	G	A	0.0164	0.0027	1.4e-09	0.07519	A	G
rs833149	chr2	182358286	C	T	-0.0131	0.0014	1.3e-19	0.5796	T	C
rs16823787	chr2	182828064	G	A	0.0189	0.0026	4.9e-13	0.07922	A	G
rs288326	chr2	182838608	A	G	0.0237	0.0022	3.4e-26	0.1207	G	A
rs13395317	chr2	190715957	C	T	-0.0158	0.0017	6.8e-20	0.2285	T	C
rs2203715	chr2	190944157	C	T	0.0171	0.0016	6.5e-26	0.2435	T	C
rs6744584	chr2	198373289	C	T	-0.0162	0.0017	1.2e-20	0.2209	T	C
rs2054123	chr2	198620639	A	G	0.01	0.0016	5.6e-10	0.2533	G	A
rs1878664	chr2	198840987	T	C	0.0106	0.0017	8.7e-10	0.2406	C	T
rs2347287	chr2	200142391	C	T	-0.0117	0.0019	7.5e-10	0.1743	T	C
rs10497854	chr2	200989452	A	C	0.0251	0.0039	1.1e-10	0.03572	C	A
rs2280509	chr2	202032645	T	C	-0.0121	0.0018	7.1e-11	0.1784	C	T
rs6735994	chr2	202333424	G	A	-0.0177	0.0016	5.4e-27	0.2488	A	G
rs2222413	chr2	203562038	G	A	-0.0092	0.0015	7.9e-10	0.3507	A	G
rs11896555	chr2	207891628	T	C	-0.0119	0.0016	6.8e-14	0.274	C	T
rs7570090	chr2	210016169	T	C	0.0092	0.0014	1.3e-10	0.4552	C	T
rs1354617	chr2	212449501	A	G	0.0103	0.0014	1.2e-12	0.4202	G	A
rs1250259	chr2	215435759	A	T	-0.0148	0.0016	9.8e-20	0.7381	T	A
rs4425077	chr2	215545793	C	G	-0.0146	0.0014	5.5e-24	0.5779	G	C
rs1898711	chr2	215620418	A	T	-0.0143	0.0018	1.7e-15	0.7989	T	A
rs2024486	chr2	216714582	G	C	0.0224	0.0031	5.6e-13	0.05928	C	G
rs10178069	chr2	216855745	G	A	-0.0173	0.0019	2.1e-19	0.1628	A	G
rs10211546	chr2	217027674	A	G	0.0145	0.0015	1.6e-21	0.6641	G	A
rs17181956	chr2	217281357	T	C	-0.0262	0.0023	1.1e-29	0.1124	C	T
rs1600212	chr2	217414387	C	T	0.0274	0.0015	5.9e-72	0.6879	T	C
rs6754424	chr2	217728057	G	A	0.0293	0.0023	1.5e-36	0.8957	A	G
rs13429408	chr2	218278137	A	C	0.0217	0.0014	1.3e-51	0.5547	C	A
rs492400	chr2	218485029	T	C	0.0279	0.0014	2.8e-83	0.5665	C	T
rs17608747	chr2	219117378	T	C	-0.0174	0.0018	2.4e-21	0.1934	C	T
rs2293081	chr2	219146370	C	A	-0.0355	0.0021	4.8e-63	0.1293	A	C
rs7589023	chr2	219273864	T	C	-0.0158	0.0019	2.1e-16	0.8397	C	T
rs7591986	chr2	219307854	C	A	-0.0336	0.0023	1.1e-49	0.1182	A	C
rs824928	chr2	221936027	G	A	0.0127	0.002	5.5e-10	0.8544	A	G
rs2602673	chr2	224198409	G	A	-0.0231	0.0014	3.1e-59	0.4381	A	G
rs6725873	chr2	225693268	T	C	-0.0101	0.0016	9.1e-10	0.2382	C	T
rs11676298	chr2	226427015	G	C	-0.0184	0.0018	1.9e-24	0.1881	C	G
rs13015698	chr2	226836102	T	C	0.0099	0.0015	5.5e-11	0.356	C	T
rs4398264	chr2	231473642	C	G	-0.0257	0.0014	1.4e-70	0.459	G	C
rs75063128	chr2	232074623	G	A	-0.0748318	0.00851123	1.46757e-18	0.49745	A	G
rs4973036	chr2	232208970	C	G	-0.0767	0.0049	4.4e-55	0.02134	G	C
rs4973517	chr2	232297108	C	T	-0.0373	0.0016	3.3e-113	0.2782	T	C
rs17296210	chr2	232581858	A	G	-0.0142	0.0016	1.6e-19	0.3005	G	A
rs283468	chr2	232793599	T	C	-0.0187	0.0015	6.7e-36	0.3388	C	T
rs12470285	chr2	232999747	T	C	-0.0187	0.0019	1.3e-22	0.1655	C	T
rs7590181	chr2	235664936	A	G	-0.0118	0.0018	1e-10	0.1928	G	A
rs3790995	chr2	237351032	A	G	0.0092	0.0015	3.9e-10	0.4218	G	A
rs7340253	chr2	238466195	G	A	-0.0119	0.0014	2.1e-16	0.4328	A	G
rs6714931	chr2	240811471	G	A	-0.0293	0.0034	5.9e-18	0.04829	A	G
rs4676386	chr2	240835569	C	A	-0.0174	0.0014	4.9e-34	0.5272	A	C
rs7425888	chr2	240987588	A	G	0.0137	0.0021	3.3e-11	0.125	G	A
rs10933529	chr2	241088867	T	C	0.0131	0.002	5.8e-11	0.1536	C	T
rs10933548	chr2	241295422	C	T	0.0168	0.0015	1.5e-30	0.3787	T	C
rs876531	chr2	241561247	T	C	-0.0218	0.0015	2.9e-48	0.4414	C	T
rs250393	chr3	8873968	G	A	0.0135	0.0018	2.6e-13	0.8249	A	G
rs9831613	chr3	8955453	C	G	0.0153	0.0021	5e-13	0.1353	G	C
rs2728923	chr3	9361831	T	G	0.0139	0.002	1.3e-11	0.8492	G	T
rs6768339	chr3	9964395	C	A	0.0137	0.0017	2.1e-16	0.2385	A	C
rs3172417	chr3	10101265	T	C	0.0115	0.0015	1.7e-14	0.4203	C	T
rs703912	chr3	10349742	G	A	-0.0123	0.0019	6.7e-11	0.1811	A	G
rs2442778	chr3	11612938	A	G	0.0418	0.0033	7.9e-37	0.95165	G	A
rs2442807	chr3	12588466	C	G	-0.0158	0.0014	9.9e-28	0.426	G	C
rs2597513	chr3	13514336	T	C	-0.0372	0.0023	7.8e-57	0.8972	C	T
rs4525847	chr3	13769173	A	C	-0.0161	0.0016	4.1e-23	0.7265	C	A
rs3733170	chr3	14181724	T	C	-0.0367	0.0038	7.6e-22	0.03251	C	T
rs4685234	chr3	14923959	T	C	-0.0119	0.0015	3.2e-15	0.6528	C	T
rs13070935	chr3	14966207	C	A	0.0131	0.0021	1.7e-10	0.1463	A	C
rs2596657	chr3	17197181	A	G	0.0083	0.0014	6.4e-09	0.4546	G	A
rs4619807	chr3	23152437	A	G	0.0114	0.0015	8.9e-14	0.6862	G	A
rs2089848	chr3	24065156	G	A	-0.0149	0.002	1e-13	0.1511	A	G
rs9814223	chr3	24320761	G	A	0.0132	0.0018	4.1e-13	0.1921	A	G
rs1603983	chr3	25108056	C	A	0.0134	0.0017	5.8e-15	0.7824	A	C
rs1483831	chr3	25342175	A	G	0.014	0.0017	9.1e-17	0.2277	G	A
rs7624087	chr3	30036866	C	T	0.0122	0.0014	3.6e-17	0.5507	T	C
rs6810039	chr3	33153498	A	C	-0.0127	0.0015	7.3e-18	0.4033	C	A
rs9850785	chr3	33518130	G	A	0.0082	0.0014	1e-08	0.4276	A	G
rs9816270	chr3	33525278	G	T	0.0553	0.005	7.2e-29	0.02613	T	G
rs6550457	chr3	37140707	C	T	-0.0096	0.0014	3.1e-11	0.4618	T	C
rs2886141	chr3	37675389	C	T	-0.0119	0.0014	1.5e-16	0.5191	T	C
rs9826470	chr3	37977937	T	C	0.0223	0.0017	5.4e-40	0.2511	C	T
rs4437116	chr3	41119852	T	C	0.0124	0.0015	2.1e-17	0.5486	C	T
rs4973930	chr3	41264572	C	A	0.0161	0.0014	7.1e-29	0.5156	A	C
rs3732858	chr3	43056273	A	G	-0.0215	0.0019	1.9e-29	0.1751	G	A
rs267239	chr3	45594721	G	C	-0.0097	0.0015	1.2e-10	0.5826	C	G
rs7633770	chr3	46647072	A	G	-0.0118	0.0015	4.8e-16	0.4148	G	A
rs724448	chr3	46894244	C	A	-0.0136	0.0015	3.9e-19	0.6083	A	C
rs17784714	chr3	47470208	C	T	-0.0259	0.0018	1.9e-46	0.2056	T	C
rs13098603	chr3	47492619	A	G	0.0095	0.0015	4.1e-10	0.3559	G	A
rs1264194	chr3	48587833	C	T	0.0178	0.0016	9.9e-28	0.6956	T	C
rs1986599	chr3	49997204	G	T	-0.0205	0.0022	7.6e-20	0.1207	T	G
rs175634	chr3	50606703	T	C	-0.0321	0.0021	7.9e-55	0.8529	C	T
rs11919195	chr3	51024971	G	A	-0.0209	0.0022	6.3e-22	0.1273	A	G
rs13095652	chr3	51206406	C	T	-0.0099	0.0015	1.5e-11	0.5625	T	C
rs4355273	chr3	51672163	G	C	-0.0264	0.002	3e-38	0.8512	C	G
rs1133415	chr3	52541815	A	G	-0.0171	0.0014	3.7e-33	0.4725	G	A
rs2163167	chr3	53097756	C	T	-0.0296	0.0014	1.5e-94	0.5577	T	C
rs793202	chr3	53477621	A	G	-0.0117	0.0014	4.7e-16	0.5287	G	A
rs11709171	chr3	53635877	C	A	0.0123	0.0018	1e-11	0.1992	A	C
rs1499890	chr3	55455770	A	G	0.0172	0.0014	3.6e-33	0.4608	G	A
rs17235684	chr3	56560093	G	A	-0.0323	0.0029	4.4e-29	0.0646	A	G
rs7619465	chr3	56661032	A	T	-0.0233	0.0014	1.1e-59	0.464	T	A
rs9841271	chr3	57665556	A	T	-0.011	0.0014	1.4e-14	0.436	T	A
rs1658343	chr3	58023291	C	T	-0.0209	0.0015	4.2e-43	0.6708	T	C
rs8640	chr3	58168600	T	C	0.0134	0.0016	3.1e-16	0.2544	C	T
rs9837001	chr3	61526906	G	A	0.0201	0.0014	2.5e-44	0.4262	A	G
rs2886521	chr3	61529075	A	G	-0.0278	0.0023	3.3e-33	0.1093	G	A
rs6779039	chr3	61543246	T	A	-0.0136	0.0024	8.7e-09	0.8922	A	T
rs6445247	chr3	62019981	A	G	-0.0143	0.0016	5.1e-19	0.2716	G	A
rs9790019	chr3	62150315	A	G	0.0161	0.0025	1.7e-10	0.09325	G	A
rs17806888	chr3	67365898	C	T	-0.0261	0.0022	4.2e-31	0.1186	T	C
rs11924537	chr3	70282193	G	C	-0.0105	0.0018	1e-08	0.199	C	G
rs11917612	chr3	71424836	C	T	0.0124	0.0016	2.7e-14	0.7313	T	C
rs9815886	chr3	72344161	C	A	-0.0252	0.0014	1.7e-69	0.5018	A	C
rs4676873	chr3	72350447	G	C	-0.0626195	0.0102188	8.90621e-10	0.49922	C	G
rs4677156	chr3	72368706	T	A	0.0344	0.0017	2e-87	0.7675	A	T
rs6549499	chr3	73044907	T	C	0.0106	0.0014	1.2e-13	0.513	C	T
rs1836918	chr3	86982854	T	C	0.0093	0.0016	5.5e-09	0.7261	C	T
rs774544	chr3	99012522	C	G	-0.0113	0.0015	1.8e-13	0.3216	G	C
rs1524217	chr3	99118955	T	C	0.0095	0.0016	1.4e-09	0.68	C	T
rs12494976	chr3	99369522	G	A	0.0113	0.0019	5.3e-09	0.1491	A	G
rs13088318	chr3	101523907	G	A	0.0108	0.0015	7.3e-13	0.3446	A	G
rs10933904	chr3	107515042	G	C	-0.0099	0.0015	1.9e-11	0.5775	C	G
rs1461107	chr3	113106065	C	G	0.0174	0.0015	4e-30	0.3468	G	C
rs10511323	chr3	113239477	G	A	-0.0173	0.0019	5.2e-20	0.1788	A	G
rs9873460	chr3	114480803	C	T	0.0166	0.0015	6.7e-28	0.6483	T	C
rs1523266	chr3	114838258	C	T	-0.0334	0.003	3.4e-28	0.9351	T	C
rs11715566	chr3	117843589	T	C	0.0115	0.0014	5.9e-16	0.4964	C	T
rs11708067	chr3	123346931	G	A	-0.0169	0.0017	9.9e-24	0.2319	A	G
rs11717152	chr3	128482170	C	A	0.0115	0.0017	1.9e-11	0.2392	A	C
rs6765930	chr3	129301935	G	A	0.0385	0.0017	3.5e-108	0.7803	A	G
rs6775488	chr3	129308315	G	T	0.0292	0.0024	2.2e-35	0.1147	T	G
rs2285373	chr3	129589366	A	G	0.0251	0.0025	6.7e-23	0.08746	G	A
rs17414558	chr3	132715312	C	T	-0.016	0.0023	1.7e-12	0.1158	T	C
rs7639683	chr3	134254889	A	G	0.0148	0.0014	4e-25	0.5246	G	A
rs4539979	chr3	134568755	T	C	0.022	0.0015	1.2e-47	0.6731	C	T
rs1393786	chr3	136135193	A	C	-0.0293	0.0016	8.9e-74	0.2743	C	A
rs4336059	chr3	136689572	G	A	-0.0193	0.0015	2.1e-37	0.344	A	G
rs1381251	chr3	137228296	G	T	-0.0127	0.0018	2.8e-12	0.1953	T	G
rs9879724	chr3	137606549	C	T	-0.012	0.0018	3.4e-11	0.2098	T	C
rs2871960	chr3	141402972	C	A	0.0773	0.0014	0	0.4447	A	C
rs58473751	chr3	141408868	G	C	0.0677958	0.0098914	7.18057e-12	0.30888	C	G
rs74526480	chr3	141489525	T	C	0.0930736	0.0134061	3.84865e-12	0.16215	C	T
rs2707982	chr3	142885634	A	G	0.0124	0.0015	2.3e-17	0.6265	G	A
rs3804664	chr3	146092621	A	G	0.012	0.0014	3.5e-17	0.4538	G	A
rs323623	chr3	152260397	A	C	0.0119	0.0015	3.5e-15	0.6627	C	A
rs4513429	chr3	152469490	G	T	-0.0101	0.0015	3.9e-11	0.328	T	G
rs7652298	chr3	157265625	C	T	-0.0185	0.0016	3.4e-29	0.2587	T	C
rs827179	chr3	158247600	A	T	0.0204	0.0014	9.7e-46	0.4173	T	A
rs16851782	chr3	168082502	C	T	-0.0113	0.0015	1.2e-13	0.3953	T	C
rs1290786	chr3	169379593	T	C	-0.0136	0.0014	4.5e-21	0.4343	C	T
rs1997280	chr3	169520227	C	T	-0.0144	0.0015	6e-23	0.5799	T	C
rs4894797	chr3	172065756	A	G	0.012	0.0014	7.8e-17	0.5775	G	A
rs1874259	chr3	172245927	T	C	0.0354	0.0014	3.8e-136	0.5082	C	T
rs7637779	chr3	172257056	G	A	0.0490878	0.00849358	7.49673e-09	0.49623	A	G
rs9841671	chr3	172426676	G	C	0.0127	0.0021	1.1e-09	0.1318	C	G
rs572169	chr3	172447937	T	C	0.0328	0.0015	9.6e-101	0.3138	C	T
rs10428248	chr3	183818875	C	G	-0.0195	0.0019	6.3e-24	0.1725	G	C
rs720390	chr3	185830895	A	G	0.0329	0.0015	5.8e-109	0.3748	G	A
rs2300922	chr3	185933681	T	C	0.0159	0.0014	3.8e-28	0.4157	C	T
rs4686904	chr3	187720734	T	C	-0.0203	0.0015	7e-42	0.6488	C	T
rs10937325	chr3	187882282	G	T	-0.0114	0.0016	2.1e-12	0.2602	T	G
rs9871418	chr3	188047551	A	G	0.0136	0.0022	6.4e-10	0.136	G	A
rs9867814	chr3	188159796	G	A	0.0116	0.0015	1.9e-14	0.3264	A	G
rs13076750	chr3	188341655	G	A	0.0124	0.0016	3.2e-14	0.259	A	G
rs13079477	chr3	188822246	C	T	0.0137	0.0018	1.3e-13	0.1812	T	C
rs6787151	chr3	190089843	C	G	0.0128	0.0015	2.6e-17	0.36	G	C
rs1501604	chr3	190949809	A	G	-0.0108	0.0015	7.2e-13	0.3796	G	A
rs13058800	chr3	191086591	G	T	-0.0147	0.0019	2.7e-14	0.1605	T	G
rs6773834	chr3	191202727	A	G	-0.0119	0.0015	3.3e-15	0.3344	G	A
rs9841435	chr3	191393371	G	A	0.0142	0.0015	3.3e-20	0.3189	A	G
rs6774653	chr3	194340832	A	G	-0.0126	0.0015	3.7e-16	0.3939	G	A
rs4393850	chr3	194932074	G	C	-0.0096	0.0015	1.1e-10	0.6336	C	G
rs9863270	chr3	195099929	G	A	-0.0127	0.0019	1.5e-11	0.2008	A	G
rs17131824	chr4	1057724	C	G	-0.0178	0.0024	4.1e-14	0.1044	G	C
rs2247341	chr4	1699590	A	G	0.0262	0.0015	3.9e-67	0.3399	G	A
rs6810591	chr4	2212092	G	A	-0.0297	0.0031	3e-21	0.05583	A	G
rs3129317	chr4	3285928	G	A	-0.0143	0.0015	7.6e-21	0.3419	A	G
rs3752442	chr4	3445156	G	A	0.0172	0.0018	9.1e-23	0.3102	A	G
rs2498323	chr4	3449382	A	G	-0.0203	0.0024	4.5e-17	0.1008	G	A
rs11722554	chr4	5015156	A	G	-0.0496	0.0039	3.3e-36	0.03274	G	A
rs4689977	chr4	5020769	G	A	-0.0248	0.002	1e-34	0.8414	A	G
rs17770213	chr4	7895139	C	T	0.0153	0.0014	2.5e-26	0.4415	T	C
rs2302580	chr4	8606907	T	C	-0.0243	0.0015	3.5e-57	0.4157	C	T
rs7677121	chr4	10652483	T	G	0.0096	0.0014	4e-11	0.5074	G	T
rs13144936	chr4	12742488	T	C	0.0392	0.0032	2.3e-34	0.05554	C	T
rs11722503	chr4	12903048	A	G	0.0469	0.004	3.1e-31	0.03584	G	A
rs763318	chr4	12961950	A	G	-0.0259	0.0014	1.6e-72	0.4569	G	A
rs4834927	chr4	13192467	G	A	0.0193	0.0015	1.5e-37	0.3453	A	G
rs10939485	chr4	13537332	G	A	-0.0189	0.0018	5.7e-25	0.7987	A	G
rs16895705	chr4	17779093	G	T	-0.0882093	0.0111487	2.53143e-15	0.42003	T	G
rs11941723	chr4	17810905	G	A	-0.0581	0.0043	3.1e-41	0.02953	A	G
rs16895971	chr4	17883363	C	T	-0.101835	0.00990509	8.57632e-25	0.29269	T	C
rs2724475	chr4	17944809	C	T	-0.0536	0.0016	9.4e-238	0.7387	T	C
rs1512102	chr4	26015181	A	G	-0.0114	0.0016	1.8e-12	0.7354	G	A
rs7688346	chr4	38675832	G	A	-0.0215	0.0021	1.1e-24	0.152	A	G
rs3796536	chr4	38691319	A	G	-0.0185	0.0028	3.8e-11	0.07232	G	A
rs6820957	chr4	38873518	G	A	0.0126	0.0016	8.2e-16	0.304	A	G
rs958633	chr4	39338313	C	T	0.0163	0.0014	2e-29	0.5267	T	C
rs13104353	chr4	39641916	C	T	0.012	0.0015	3.4e-15	0.3526	T	C
rs4861100	chr4	41388634	A	T	-0.0099	0.0016	1.7e-09	0.2526	T	A
rs7689003	chr4	45123808	G	A	-0.0123	0.0015	4.1e-16	0.6693	A	G
rs924837	chr4	45970636	A	G	-0.0099	0.0015	1.3e-11	0.4148	G	A
rs6851073	chr4	51848345	G	C	0.0147	0.0016	1.1e-20	0.2693	C	G
rs3817270	chr4	53440969	A	T	-0.014	0.002	2.8e-12	0.8421	T	A
rs3805148	chr4	55440643	C	A	0.017	0.0015	4.1e-30	0.3706	A	C
rs10517367	chr4	56069630	T	C	-0.0104	0.0016	7.2e-11	0.2767	C	T
rs66790703	chr4	56907742	A	G	0.0496832	0.00894591	2.79632e-08	0.39762	G	A
rs17081933	chr4	56956703	A	T	0.0337	0.0018	3e-75	0.1927	T	A
rs16845048	chr4	72649525	G	A	0.0378	0.0029	4.3e-38	0.06168	A	G
rs7697556	chr4	72649596	C	T	-0.0315	0.0014	1.2e-107	0.5154	T	C
rs2703126	chr4	76898689	C	T	0.0104	0.0016	4.3e-11	0.3051	T	C
rs1901568	chr4	81265876	C	T	0.0443	0.0015	3.7e-181	0.3278	T	C
rs1427461	chr4	82319981	G	A	-0.0156	0.0017	2.6e-19	0.2193	A	G
rs12642612	chr4	84471842	A	G	-0.0105	0.0017	1.1e-09	0.2347	G	A
rs1471251	chr4	87055207	T	A	-0.0092	0.0015	3.7e-10	0.3897	A	T
rs1545735	chr4	87657335	C	T	-0.018	0.0014	4.5e-36	0.5113	T	C
rs727420	chr4	87829584	T	A	0.017	0.0016	1.3e-25	0.2753	A	T
rs16996144	chr4	88976371	G	A	0.0091	0.0014	2e-10	0.5187	A	G
rs4699384	chr4	99649524	A	T	0.0187	0.0018	1.9e-24	0.1884	T	A
rs882920	chr4	104138644	C	T	0.0097	0.0015	4.8e-11	0.403	T	C
rs10008015	chr4	105084090	T	C	0.027	0.0024	1.4e-29	0.8914	C	T
rs10010325	chr4	105185196	A	C	0.0289	0.0014	6.8e-89	0.4926	C	A
rs4956038	chr4	108177007	A	C	-0.0121	0.0015	8.5e-17	0.5796	C	A
rs1558172	chr4	108355674	A	G	-0.0133	0.0015	9.2e-18	0.3708	G	A
rs17583662	chr4	108540829	G	A	0.0193	0.0015	9.6e-39	0.3748	A	G
rs6533498	chr4	110191632	A	C	-0.0093	0.0015	8.8e-10	0.3439	C	A
rs2374218	chr4	113895834	T	C	-0.0115	0.0015	5.7e-15	0.5926	C	T
rs6827199	chr4	113975748	A	G	0.0141	0.0015	7.1e-20	0.3176	G	A
rs6838153	chr4	121799844	G	A	0.0228	0.0015	4.9e-50	0.3302	A	G
rs769242	chr4	121821062	C	T	0.0248	0.0035	1e-12	0.95422	T	C
rs12513181	chr4	122914501	A	C	-0.019	0.0016	5.1e-31	0.7412	C	A
rs11944380	chr4	123198679	C	T	0.0174	0.0021	2.7e-16	0.8623	T	C
rs1914902	chr4	123937745	A	T	0.0128	0.0015	1.1e-16	0.3186	T	A
rs6811274	chr4	137362251	T	C	0.0101	0.0014	2e-12	0.4459	C	T
rs11941589	chr4	139194590	A	G	-0.0113	0.0014	3.5e-15	0.5537	G	A
rs300904	chr4	143318672	G	A	0.0147	0.0014	1.6e-24	0.5294	A	G
rs17017911	chr4	143559481	A	G	0.0251	0.0018	2.2e-42	0.1988	G	A
rs720485	chr4	144541436	C	A	0.0165	0.0015	1.8e-29	0.4137	A	C
rs7666523	chr4	144593720	T	C	0.0261	0.0023	7.9e-30	0.116	C	T
rs7689420	chr4	144647200	C	T	0.0837	0.0019	0	0.8342	T	C
rs13146972	chr4	144648540	T	C	0.0528	0.0014	6.5e-295	0.4447	C	T
rs17777628	chr4	144671534	A	G	-0.051	0.0038	6.4e-41	0.0373	G	A
rs11727676	chr4	144737912	C	T	0.0369	0.0026	3.5e-46	0.09454	T	C
rs17725600	chr4	145106282	T	G	0.0266	0.0022	3.7e-33	0.1231	G	T
rs4835018	chr4	145832178	C	T	0.0102	0.0017	5.1e-09	0.2184	T	C
rs11930385	chr4	145924600	T	C	0.0117	0.0015	1.3e-15	0.4017	C	T
rs11100904	chr4	145983152	T	C	0.0092	0.0015	2.1e-10	0.4205	C	T
rs2884401	chr4	148062931	C	G	0.0094	0.0016	9.3e-09	0.7422	G	C
rs6848368	chr4	148775934	C	A	0.0133	0.0018	1.2e-13	0.1983	A	C
rs1443088	chr4	151528974	A	G	-0.0142	0.0014	1.2e-22	0.5606	G	A
rs10517658	chr4	156867038	A	G	-0.0224	0.0026	2.5e-17	0.08489	G	A
rs4504305	chr4	157982801	G	A	0.0108	0.0015	1.1e-13	0.5862	A	G
rs2310357	chr4	185776340	C	T	0.0158	0.0016	4.1e-22	0.717	T	C
rs1574220	chr5	314403	C	T	0.0286	0.0028	2.6e-25	0.08033	T	C
rs274679	chr5	6751313	C	A	-0.0134	0.0015	8.2e-19	0.6612	A	C
rs875525	chr5	14747138	T	C	-0.0096	0.0016	3.4e-09	0.2575	C	T
rs860664	chr5	14960126	G	T	0.0161	0.002	2.9e-15	0.8479	T	G
rs17409588	chr5	31528520	C	T	0.0164	0.0015	3.7e-26	0.3175	T	C
rs10057069	chr5	32716483	C	T	0.0313	0.0016	6.9e-83	0.2792	T	C
rs3811958	chr5	32771937	G	A	0.0298	0.0016	8.2e-75	0.2629	A	G
rs1173727	chr5	32830415	C	T	-0.0368	0.0015	3.2e-141	0.5965	T	C
rs11744178	chr5	33004902	T	C	0.0227	0.0015	2.8e-55	0.4163	C	T
rs1813313	chr5	33271878	A	C	0.0362	0.0024	1.7e-51	0.90295	C	A
rs6896697	chr5	33330701	C	T	0.0154	0.0015	1e-25	0.3769	T	C
rs12656216	chr5	36160566	A	G	0.0192	0.0018	4.2e-27	0.7786	G	A
rs16902835	chr5	36225144	T	C	-0.0089	0.0014	7.7e-10	0.4049	C	T
rs2731880	chr5	36603282	C	T	-0.0083	0.0014	7.4e-09	0.4922	T	C
rs292168	chr5	36807087	G	A	-0.0225	0.0014	3.1e-55	0.4495	A	G
rs781794	chr5	37589193	A	G	0.0125	0.0016	1.8e-14	0.7422	G	A
rs17379667	chr5	37809930	T	C	0.0242	0.0025	1.9e-22	0.0915	C	T
rs9292741	chr5	39427053	G	A	-0.0221	0.0016	3.1e-43	0.2582	A	G
rs1867540	chr5	41279135	C	T	0.0251	0.0034	1.2e-13	0.05104	T	C
rs614990	chr5	41576094	A	G	-0.0224	0.0032	2.1e-12	0.0525	G	A
rs11740415	chr5	42582425	T	C	-0.0164	0.0016	1.5e-23	0.2516	C	T
rs2972758	chr5	42819742	G	C	0.0218	0.0014	9.9e-52	0.5765	C	G
rs12055151	chr5	51123091	A	T	-0.0136	0.0015	3.2e-19	0.6458	T	A
rs6450136	chr5	53469501	A	C	-0.0125	0.0016	1.3e-15	0.6987	C	A
rs17251005	chr5	53978968	C	G	-0.013	0.0021	1e-09	0.1205	G	C
rs6897117	chr5	55690947	C	T	-0.032	0.0015	5.8e-95	0.7013	T	C
rs157845	chr5	56500812	C	T	-0.0112	0.0016	9.8e-12	0.7409	T	C
rs702691	chr5	56818699	G	T	0.0181	0.0015	6.7e-34	0.6546	T	G
rs854037	chr5	57795956	G	A	-0.0117	0.0018	2.2e-10	0.1881	A	G
rs11738454	chr5	59046293	T	C	0.0159	0.0021	1.9e-14	0.1407	C	T
rs6877743	chr5	59158364	C	A	-0.0098	0.0014	6.6e-12	0.45	A	C
rs7703022	chr5	59299780	T	C	-0.0139	0.0015	2e-21	0.4288	C	T
rs10447098	chr5	61535306	T	C	-0.0107	0.0018	9.8e-10	0.2114	C	T
rs11738854	chr5	65378088	C	T	0.023	0.0021	1.8e-27	0.1179	T	C
rs10515054	chr5	67810980	G	A	0.0432	0.0045	1.2e-21	0.03157	A	G
rs999826	chr5	67979528	A	G	-0.0136	0.0017	1.7e-15	0.2337	G	A
rs450986	chr5	68027680	C	G	0.0267	0.0025	7.2e-27	0.09203	G	C
rs2112208	chr5	68268499	C	T	-0.012	0.0017	8.7e-13	0.2478	T	C
rs3756668	chr5	68300260	A	G	-0.0178	0.0014	3.5e-35	0.4404	G	A
rs415817	chr5	72549051	T	C	-0.0129	0.0017	1.2e-13	0.2158	C	T
rs11744267	chr5	72782562	A	T	-0.0187	0.0019	8e-22	0.1678	T	A
rs34651	chr5	72848178	T	C	-0.0382	0.0027	6.9e-46	0.91897	C	T
rs13160226	chr5	73138397	G	A	0.0107	0.0017	4.8e-10	0.2367	A	G
rs2454846	chr5	74663701	G	A	0.0116	0.0016	5.2e-13	0.2917	A	G
rs6877994	chr5	77851157	G	C	0.0097	0.0014	1.7e-11	0.5076	C	G
rs12520209	chr5	78211132	T	C	-0.0244	0.0017	2.9e-46	0.2252	C	T
rs10805921	chr5	78854889	A	G	-0.0156	0.002	3.1e-15	0.1525	G	A
rs17223387	chr5	79014368	C	G	0.0118	0.0017	3.9e-12	0.2394	G	C
rs7712162	chr5	79649348	T	C	0.0196	0.0019	1.8e-25	0.1772	C	T
rs411840	chr5	81719139	T	C	0.0098	0.0014	1.1e-11	0.5011	C	T
rs13163838	chr5	86908728	T	G	0.014	0.0016	8.2e-18	0.7337	G	T
rs4421140	chr5	87361147	C	T	0.01	0.0017	9.6e-09	0.2295	T	C
rs13187743	chr5	87662997	C	T	0.0178	0.0026	1.2e-11	0.06952	T	C
rs11748980	chr5	89537705	C	T	-0.0146	0.0014	5.1e-24	0.437	T	C
rs4489092	chr5	91124827	T	G	-0.0139	0.0015	3.7e-20	0.6419	G	T
rs17085593	chr5	96295001	G	C	0.0182	0.0015	2.2e-32	0.3195	C	G
rs7729395	chr5	102764872	T	C	-0.0311	0.0034	2.8e-20	0.05426	C	T
rs13185815	chr5	108780841	G	T	-0.034	0.0027	3.7e-36	0.07805	T	G
rs9326750	chr5	108837302	A	G	0.0266	0.0017	1.1e-54	0.2276	G	A
rs27755	chr5	111693373	T	A	0.0135	0.002	2.8e-11	0.8559	A	T
rs2020383	chr5	112738659	T	C	-0.0159	0.0014	3.6e-28	0.5381	C	T
rs4921010	chr5	115705974	T	C	0.0236	0.0016	4.4e-50	0.2864	C	T
rs26537	chr5	115841317	C	T	-0.0092	0.0015	2.7e-09	0.3248	T	C
rs890913	chr5	123400056	T	A	-0.0243	0.0014	3.3e-63	0.435	A	T
rs426120	chr5	127517800	C	G	-0.0099	0.0015	5.8e-11	0.3362	G	C
rs251215	chr5	128207930	A	C	-0.0164	0.0014	5.8e-30	0.5311	C	A
rs154001	chr5	128349443	T	C	0.0173	0.0015	6.6e-30	0.6752	C	T
rs17692694	chr5	130994774	A	G	-0.0136	0.0023	3.7e-09	0.1078	G	A
rs3891636	chr5	131103398	C	T	-0.0199	0.0017	1.7e-30	0.2222	T	C
rs25887	chr5	132080368	A	C	0.0141	0.0015	2.9e-22	0.5712	C	A
rs7705189	chr5	132287665	G	A	0.0352	0.0014	1.2e-130	0.4635	A	G
rs2108665	chr5	134800643	T	C	-0.0278	0.0023	7.4e-33	0.1054	C	T
rs31198	chr5	135036995	C	T	-0.0359	0.0016	1.7e-106	0.2625	T	C
rs39881	chr5	135043621	A	C	-0.0189	0.0017	2.7e-28	0.7692	C	A
rs9327705	chr5	135174613	A	G	0.0167	0.0017	2.6e-22	0.2339	G	A
rs4835672	chr5	138233178	C	T	0.0138	0.0017	2.5e-15	0.2333	T	C
rs10040658	chr5	139671430	A	G	0.0175	0.0015	1.4e-31	0.3716	G	A
rs2740584	chr5	141182193	T	C	0.0124	0.0017	1.6e-13	0.2437	C	T
rs3749759	chr5	141661868	A	G	-0.0109	0.0015	5.2e-13	0.6355	G	A
rs4912636	chr5	142257493	G	T	-0.0103	0.0014	4.7e-13	0.5165	T	G
rs6897876	chr5	142308074	C	T	0.0125	0.0014	4.6e-18	0.5425	T	C
rs253438	chr5	142421651	G	A	-0.0109	0.0014	2.4e-14	0.4413	A	G
rs250092	chr5	142598678	G	A	-0.0137	0.002	2e-11	0.8526	A	G
rs11167790	chr5	142688801	C	T	0.0113	0.0016	7.9e-12	0.256	T	C
rs853170	chr5	143157909	C	T	0.0121	0.0016	1.3e-13	0.2557	T	C
rs258763	chr5	143272796	A	T	0.0144	0.0014	3.3e-23	0.569	T	A
rs6864427	chr5	143772315	C	T	0.0124	0.0014	5.1e-18	0.463	T	C
rs352347	chr5	149345636	G	A	0.0104	0.0014	3.6e-13	0.4975	A	G
rs3776069	chr5	149935724	C	T	0.017	0.002	2.5e-17	0.1517	T	C
rs6579789	chr5	150335701	A	G	-0.0113	0.0016	5.7e-12	0.2556	G	A
rs11741790	chr5	157332169	A	G	-0.0166	0.0017	2.4e-21	0.2111	G	A
rs4921518	chr5	159005449	T	A	-0.0147	0.0015	1.5e-23	0.3907	A	T
rs1527825	chr5	166470312	C	A	-0.0097	0.0015	6.3e-11	0.6092	A	C
rs4282339	chr5	168829235	A	G	-0.0368	0.0018	1.7e-97	0.2077	G	A
rs4620037	chr5	171448093	C	A	-0.0306	0.0018	2e-66	0.2146	A	C
rs154363	chr5	171590091	G	A	0.0206	0.0015	1.5e-40	0.6924	A	G
rs33852	chr5	171762567	G	A	0.0279	0.0015	6.8e-75	0.3321	A	G
rs702072	chr5	171776244	A	G	0.0128	0.0019	4.3e-12	0.1876	G	A
rs1368380	chr5	171858628	T	C	0.0314	0.0015	3.1e-103	0.4331	C	T
rs793356	chr5	173103558	C	T	-0.0136	0.0014	5e-21	0.5934	T	C
rs17075791	chr5	173319023	C	T	-0.0236	0.0041	7.1e-09	0.03689	T	C
rs12515303	chr5	173335648	G	A	-0.0131	0.0016	3.2e-17	0.3364	A	G
rs11954548	chr5	173352472	T	C	0.0162	0.0017	1.8e-22	0.2691	C	T
rs10780116	chr5	173412286	T	C	0.0127	0.0014	1.1e-18	0.4722	C	T
rs17052028	chr5	173541488	G	A	-0.011	0.0015	4.8e-13	0.3342	A	G
rs889014	chr5	173557111	T	C	-0.0257	0.0015	7.7e-67	0.3462	C	T
rs13173671	chr5	173599187	C	T	-0.0314	0.0039	1.1e-15	0.03631	T	C
rs1966265	chr5	177089630	A	G	0.0453	0.0017	2.3e-150	0.2348	G	A
rs422421	chr5	177090325	C	T	0.0406	0.0017	3e-120	0.7791	T	C
rs12055154	chr5	177248422	G	A	-0.075	0.0046	2.1e-60	0.02572	A	G
rs6601211	chr5	178108369	G	A	-0.0109	0.0015	1.5e-12	0.632	A	G
rs11750568	chr5	179108712	G	A	-0.019	0.0015	4.5e-36	0.6646	A	G
rs2278221	chr5	179154858	A	G	-0.0149	0.0017	1.7e-18	0.242	G	A
rs466522	chr5	179260675	A	G	-0.0135	0.0018	1.3e-13	0.2056	G	A
rs6879260	chr5	180304014	C	T	0.0255	0.0015	4.5e-67	0.6083	T	C
rs3733750	chr5	180808503	C	T	0.0161	0.0023	7.7e-12	0.106	T	C
rs13361994	chr5	181218211	C	T	-0.0147	0.0019	1.4e-14	0.1756	T	C
rs2569881	chr6	1619802	A	G	0.0175	0.0022	4.3e-16	0.1317	G	A
rs3778519	chr6	1771278	T	C	-0.0139	0.0016	1.9e-17	0.2785	C	T
rs1570534	chr6	1901261	T	C	0.015	0.0015	8.6e-23	0.6726	C	T
rs9378684	chr6	2110707	T	C	0.0192	0.0018	6.4e-27	0.2114	C	T
rs932445	chr6	2166991	C	T	-0.0174	0.0014	2.2e-33	0.4062	T	C
rs9504925	chr6	6769205	A	G	-0.0116	0.0016	3.7e-13	0.2801	G	A
rs1887508	chr6	6887374	G	A	0.0327	0.0022	1e-48	0.8831	A	G
rs9379084	chr6	7231610	A	G	-0.0421	0.0025	6.1e-65	0.1179	G	A
rs3778321	chr6	7250037	A	G	0.0211	0.0019	8.9e-30	0.1738	G	A
rs3812163	chr6	7725527	T	A	0.0404	0.0014	9.4e-175	0.459	A	T
rs9328445	chr6	7792714	C	T	0.0159	0.0014	2.2e-28	0.5533	T	C
rs17143141	chr6	7800984	A	G	0.0341	0.002	4.2e-68	0.1602	G	A
rs267195	chr6	7847695	T	C	0.0106	0.0014	1.7e-13	0.418	C	T
rs11962800	chr6	7886672	G	A	-0.0154	0.0023	1.4e-11	0.1062	A	G
rs1150579	chr6	11653246	A	G	-0.0092	0.0015	7.9e-10	0.6629	G	A
rs2327506	chr6	12029191	C	T	0.0089	0.0014	5.8e-10	0.5755	T	C
rs504056	chr6	19014240	T	C	0.0165	0.0023	8.7e-13	0.1051	C	T
rs1047014	chr6	19841262	C	T	0.0312	0.0017	3.1e-77	0.2561	T	C
rs196051	chr6	22055902	G	A	-0.0134	0.0015	3e-20	0.3858	A	G
rs6922886	chr6	22541560	C	G	-0.0102	0.0014	6.8e-13	0.5699	G	C
rs2038135	chr6	24645739	G	T	0.0101	0.0015	3.6e-11	0.6434	T	G
rs9358839	chr6	25181219	T	C	-0.0099	0.0015	4e-11	0.4623	C	T
rs1800562	chr6	26092913	A	G	0.0331	0.0027	2.2e-33	0.06425	G	A
rs111771247	chr6	26191078	G	C	0.0869604	0.0154653	1.87738e-08	0.12313	C	G
rs806794	chr6	26200449	G	A	-0.0586	0.0016	2e-295	0.2938	A	G
rs9358928	chr6	26340802	T	C	0.0943697	0.0152946	6.8233e-10	0.21743	C	T
rs12213722	chr6	26472855	G	A	-0.0395	0.0023	3.8e-67	0.1004	A	G
rs5030955	chr6	27246088	T	C	-0.0422	0.0025	6.9e-65	0.086	C	T
rs13214703	chr6	27973609	C	T	0.0333	0.0025	6.7e-39	0.07665	T	C
rs2079705	chr6	28356191	A	G	-0.043	0.0028	7.9e-52	0.06507	G	A
rs3131847	chr6	29681328	A	G	-0.0189	0.0015	1.4e-34	0.3195	G	A
rs2272874	chr6	29728468	C	T	-0.026	0.0022	3.7e-32	0.1197	T	C
rs1265097	chr6	31138682	A	C	-0.0596	0.0025	5.4e-121	0.1007	C	A
rs1966	chr6	31139956	T	C	-0.02	0.0018	1.9e-29	0.1947	C	T
rs6916394	chr6	31496273	C	T	-0.019	0.0015	5.4e-35	0.3134	T	C
rs6916921	chr6	31552649	T	C	-0.0159	0.0027	4.1e-09	0.09015	C	T
rs2844480	chr6	31597044	T	C	-0.0397	0.0018	9.1e-103	0.2032	C	T
rs11965547	chr6	31868374	A	G	-0.0188	0.0025	3.7e-14	0.09986	G	A
rs389883	chr6	31979683	T	G	-0.0396	0.0015	2.2e-149	0.7066	G	T
rs2857106	chr6	32819793	C	T	-0.0252	0.0018	2.6e-42	0.1863	T	C
rs9277935	chr6	33192648	T	G	-0.0178	0.0017	5.9e-25	0.2119	G	T
rs420361	chr6	33588127	C	T	0.0198	0.0015	2.4e-39	0.652	T	C
rs9461905	chr6	33754156	C	T	0.0182	0.0018	8.6e-25	0.7929	T	C
rs11970492	chr6	33990223	C	G	-0.0204	0.0032	1.8e-10	0.04601	G	C
rs7742369	chr6	34197944	G	A	0.103162	0.0145902	1.54225e-12	0.12067	A	G
rs12214804	chr6	34221089	T	C	-0.0881	0.0025	2.1e-261	0.91382	C	T
rs11970421	chr6	34585386	T	C	-0.0473	0.0027	1.6e-67	0.07577	C	T
rs2815005	chr6	34671070	A	G	0.06	0.002	5.6e-192	0.154	G	A
rs7752468	chr6	34919971	G	A	-0.0431	0.0034	9.9e-38	0.05122	A	G
rs1880090	chr6	35023191	T	C	0.0299	0.0016	2.8e-74	0.7444	C	T
rs3800404	chr6	35170093	G	T	-0.0136	0.0021	6.2e-11	0.1329	T	G
rs732594	chr6	35238776	A	C	0.0111	0.0014	1.9e-14	0.4636	C	A
rs9470191	chr6	35999281	G	A	-0.0111	0.0014	4.8e-15	0.4725	A	G
rs2395655	chr6	36677919	G	A	0.0091	0.0015	9.3e-10	0.395	A	G
rs9470482	chr6	37111042	A	T	0.0218	0.0037	4e-09	0.03783	T	A
rs9470811	chr6	38180808	G	A	0.0095	0.0016	4.9e-09	0.7391	A	G
rs2815116	chr6	39220110	A	G	0.0141	0.0016	3.4e-19	0.7083	G	A
rs9367004	chr6	39397770	T	C	0.0272	0.0038	1.6e-12	0.03736	C	T
rs6458122	chr6	39801679	T	C	0.0082	0.0014	8e-09	0.4843	C	T
rs6901756	chr6	41857852	C	T	-0.0205	0.0021	3.4e-22	0.1221	T	C
rs13340461	chr6	41956540	T	C	0.0232	0.0016	1.4e-47	0.2803	C	T
rs10948007	chr6	42035346	T	C	0.0246	0.0026	2.8e-21	0.07758	C	T
rs2125738	chr6	43360012	G	A	0.013	0.0015	3.9e-19	0.6003	A	G
rs9463015	chr6	44727321	G	A	-0.0183	0.0028	2.9e-11	0.05332	A	G
rs7749796	chr6	44922995	A	T	-0.0326	0.0025	4.1e-38	0.09127	T	A
rs9395066	chr6	45127426	C	A	0.0232	0.0014	1.4e-58	0.41	A	C
rs12662272	chr6	45156152	A	C	-0.018	0.0023	1.1e-15	0.1173	C	A
rs1388244	chr6	45682417	C	T	0.0129	0.0018	7.6e-13	0.2029	T	C
rs9395264	chr6	47507286	G	T	0.0219	0.0015	2.2e-46	0.6867	T	G
rs614570	chr6	52454453	T	C	-0.0104	0.0014	2.4e-13	0.4281	C	T
rs12175817	chr6	53466346	C	A	-0.014	0.0016	7.6e-19	0.2787	A	C
rs9370463	chr6	55743219	C	T	-0.0147	0.0023	3.9e-10	0.1044	T	C
rs2167460	chr6	57019653	C	T	0.0123	0.0018	7.2e-12	0.7958	T	C
rs9370563	chr6	57104425	T	C	0.0163	0.0026	5.2e-10	0.08571	C	T
rs9354469	chr6	66764388	G	A	-0.012	0.0017	7.1e-12	0.285	A	G
rs504139	chr6	71491704	A	G	0.0154	0.0015	8.1e-24	0.3103	G	A
rs12211255	chr6	75478614	A	C	0.0428	0.0023	1.3e-74	0.105	C	A
rs2133193	chr6	75696284	A	G	0.012	0.0015	4.4e-16	0.3626	G	A
rs1213366	chr6	77467153	A	G	0.0087	0.0014	1.5e-09	0.5614	G	A
rs12662365	chr6	80195672	A	T	-0.0308	0.0015	5.4e-91	0.3154	T	A
rs1020044	chr6	80525158	G	A	0.0277	0.0019	8.1e-46	0.1549	A	G
rs9443804	chr6	80605880	G	A	0.0215	0.0014	7e-50	0.4422	A	G
rs1342975	chr6	81030065	A	G	-0.0306	0.002	3.6e-53	0.1517	G	A
rs9344126	chr6	81197842	C	T	-0.03	0.0014	2.6e-95	0.5067	T	C
rs9352968	chr6	81211627	C	T	-0.0362	0.0042	1.1e-17	0.03379	T	C
rs511817	chr6	81453140	A	C	-0.0232	0.0036	1e-10	0.05104	C	A
rs3828760	chr6	81747267	T	C	0.0253	0.0021	5.4e-32	0.1279	C	T
rs915125	chr6	81753659	T	C	-0.0146	0.0016	2.3e-20	0.2906	C	T
rs1931634	chr6	81843678	A	G	0.0162	0.0016	2.1e-23	0.7374	G	A
rs12209871	chr6	83036340	G	A	0.019	0.002	3.9e-21	0.1496	A	G
rs12193281	chr6	83615465	C	T	0.0128	0.0015	1.8e-17	0.3271	T	C
rs761391	chr6	84738385	T	C	-0.016	0.0015	1.8e-27	0.5289	C	T
rs1173416	chr6	85706095	A	G	-0.0082	0.0014	6.1e-09	0.513	G	A
rs393203	chr6	89167397	T	G	0.0122	0.0019	2e-10	0.1586	G	T
rs13203302	chr6	95559822	T	C	0.0152	0.0026	3.8e-09	0.07905	C	T
rs2894889	chr6	99714064	T	A	0.013	0.0015	2.8e-18	0.3423	A	T
rs395962	chr6	104949543	G	T	-0.0478	0.0015	3.8e-218	0.679	T	G
rs7750292	chr6	105900072	C	A	0.0096	0.0014	2.4e-11	0.5382	A	C
rs6927268	chr6	108544460	G	T	-0.011	0.0018	3.5e-10	0.2104	T	G
rs3813498	chr6	108622962	T	C	0.0281	0.0018	2.7e-53	0.8149	C	T
rs12206606	chr6	109032316	A	C	0.015	0.0022	1.5e-11	0.1231	C	A
rs1074766	chr6	109360263	C	T	-0.0238	0.0014	6.5e-61	0.4027	T	C
rs174374	chr6	111584852	C	T	0.0123	0.0019	2.2e-10	0.1607	T	C
rs519604	chr6	116387659	C	T	0.0195	0.0014	7e-42	0.524	T	C
rs6913428	chr6	117049437	C	T	0.017	0.0023	1.4e-13	0.112	T	C
rs509067	chr6	117140877	C	T	0.0234	0.0014	1.2e-58	0.5844	T	C
rs389663	chr6	117546888	C	T	-0.0184	0.0015	7.3e-34	0.6763	T	C
rs980014	chr6	125746855	G	T	0.0167	0.0014	4.9e-32	0.5181	T	G
rs1490384	chr6	126530014	T	C	0.0436	0.0014	3.2e-205	0.493	C	T
rs6942097	chr6	127575616	G	A	-0.0096	0.0014	1.9e-11	0.5117	A	G
rs7774592	chr6	129502466	C	T	0.0211	0.0016	1e-38	0.735	T	C
rs1415701	chr6	130024690	A	G	-0.0419	0.0017	1.1e-139	0.275	G	A
rs7740107	chr6	130053316	A	T	-0.0469	0.0016	1.1e-187	0.7485	T	A
rs9388858	chr6	130828987	C	T	-0.0112	0.0015	3.8e-13	0.6822	T	C
rs7752292	chr6	130996736	A	T	0.026	0.0015	1.7e-70	0.3671	T	A
rs7739344	chr6	132220208	G	A	0.0102	0.0014	1.6e-12	0.4251	A	G
rs7743622	chr6	132409233	G	C	0.0124	0.0015	2.2e-17	0.5822	C	G
rs12524250	chr6	133321780	G	A	-0.0151	0.0014	3.9e-26	0.5334	A	G
rs3822939	chr6	133528651	G	A	0.0122	0.0014	1.1e-17	0.5471	A	G
rs7769440	chr6	135905997	T	C	0.0104	0.0014	4.7e-13	0.5196	C	T
rs17743155	chr6	138964339	C	T	-0.0149	0.0019	4.7e-15	0.1687	T	C
rs4520026	chr6	139752477	G	A	-0.0167	0.0017	5.7e-22	0.2337	A	G
rs9385883	chr6	139852653	C	T	-0.0158	0.0019	1.3e-16	0.1664	T	C
rs1572671	chr6	140010959	A	G	0.0134	0.0014	3.9e-21	0.4745	G	A
rs6570436	chr6	141040373	C	T	-0.0171	0.0015	2e-28	0.6886	T	C
rs4140408	chr6	141758010	G	T	0.0134	0.0022	4.6e-10	0.8641	T	G
rs4896582	chr6	142382740	A	G	-0.0525	0.0015	3.7e-252	0.3097	G	A
rs223604	chr6	143383537	T	G	-0.0124	0.0014	7.4e-18	0.4245	G	T
rs2748483	chr6	146014424	T	A	-0.0135	0.0014	5.8e-21	0.4283	A	T
rs11751157	chr6	148518682	T	C	-0.0162	0.0023	4.7e-12	0.1072	C	T
rs9403991	chr6	148851413	A	C	0.0187	0.0028	3.8e-11	0.06899	C	A
rs10457839	chr6	149053184	T	C	-0.0112	0.0015	2.7e-14	0.3584	C	T
rs7771156	chr6	151400614	A	G	0.0149	0.0015	7.3e-23	0.3284	G	A
rs9479117	chr6	151796550	C	T	0.0199	0.002	4.2e-24	0.1663	T	C
rs4870056	chr6	151841092	A	G	0.0314	0.0014	3.1e-105	0.4567	G	A
rs12204714	chr6	151914204	T	C	0.0108	0.0015	2.7e-13	0.6506	C	T
rs3020418	chr6	152024027	A	G	0.0324	0.0016	2.1e-93	0.2852	G	A
rs2881823	chr6	152151496	G	A	0.0308	0.0038	5.7e-16	0.04069	A	G
rs2813536	chr6	152199878	G	C	-0.0113	0.0015	3.9e-14	0.3839	C	G
rs9479504	chr6	153083690	A	G	0.0096	0.0014	1.2e-11	0.4834	G	A
rs483503	chr6	153494370	T	C	0.0103	0.0015	1.2e-11	0.6865	C	T
rs2275337	chr6	154410770	G	C	0.0092	0.0014	1.9e-10	0.5071	C	G
rs3734322	chr6	155258112	C	A	0.0159	0.0014	2.9e-28	0.5891	A	C
rs11156098	chr6	156266697	C	T	-0.0188	0.0023	8.4e-16	0.888	T	C
rs11756587	chr6	158151943	T	G	-0.0161	0.002	2.9e-15	0.1353	G	T
rs10945541	chr6	158319186	G	A	-0.0232	0.0015	1.8e-53	0.6614	A	G
rs1564348	chr6	160157828	C	T	-0.0123	0.0019	1.4e-10	0.1627	T	C
rs486359	chr6	160353409	C	G	0.0204	0.0014	5.1e-46	0.4853	G	C
rs17630640	chr6	163686497	G	A	0.0252	0.0021	1.6e-32	0.1351	A	G
rs221721	chr6	165475543	T	A	-0.014	0.0015	4.7e-21	0.5597	A	T
rs2305089	chr6	166165782	T	C	-0.0142	0.0014	9.9e-24	0.5054	C	T
rs2763273	chr6	168433943	T	C	-0.0273	0.0017	3.7e-59	0.2255	C	T
rs7758658	chr6	168943914	A	G	0.0161	0.0014	1.4e-29	0.4919	G	A
rs9765848	chr6	169249732	C	T	0.0158	0.0019	2e-16	0.819	T	C
rs1106296	chr7	1340590	C	T	-0.0103	0.0015	1.9e-11	0.3433	T	C
rs1434336	chr7	1520524	G	A	-0.0113	0.0014	5.6e-15	0.5271	A	G
rs798532	chr7	2729230	C	T	-0.0308	0.0016	5.9e-82	0.7223	T	C
rs3846991	chr7	2741615	C	G	0.0243	0.0015	5e-57	0.332	G	C
rs798490	chr7	2761908	A	G	-0.0588	0.0016	3.3e-307	0.2881	G	A
rs10253861	chr7	8070845	A	G	0.0205	0.0014	1.4e-45	0.5479	G	A
rs2043539	chr7	12214254	A	G	-0.0118	0.0015	2.3e-15	0.417	G	A
rs1990224	chr7	12576073	T	C	-0.0116	0.0014	1.1e-15	0.4665	C	T
rs10255497	chr7	13981061	C	T	-0.0096	0.0014	2.5e-11	0.5437	T	C
rs6980299	chr7	15675431	C	T	-0.0159	0.0017	5.1e-21	0.7643	T	C
rs1528146	chr7	16023333	C	T	0.0095	0.0014	4.6e-11	0.5525	T	C
rs4719495	chr7	17283059	C	T	-0.0113	0.0018	7.4e-10	0.8089	T	C
rs4484585	chr7	18678950	A	C	-0.0255	0.0031	5.7e-16	0.05385	C	A
rs1178164	chr7	18748966	C	T	0.0198	0.0017	1.1e-29	0.2147	T	C
rs17140133	chr7	18846554	A	G	0.03	0.0046	1e-10	0.02649	G	A
rs13245206	chr7	18851636	A	G	-0.0153	0.0015	8.4e-25	0.3725	G	A
rs2189741	chr7	18975640	G	T	0.016	0.0017	1.1e-20	0.7748	T	G
rs17140875	chr7	19208655	T	G	-0.0367	0.0033	3.2e-28	0.05104	G	T
rs11767221	chr7	19570020	G	A	-0.0215	0.0015	9.9e-48	0.6419	A	G
rs1023522	chr7	20373967	G	A	0.0273	0.0014	6.6e-81	0.477	A	G
rs13227860	chr7	22114836	A	G	-0.0094	0.0016	6.9e-09	0.3037	G	A
rs3087888	chr7	23311461	G	C	-0.0272	0.0029	9.8e-21	0.06841	C	G
rs12534093	chr7	23463355	A	T	-0.0354	0.0017	6.9e-97	0.24	T	A
rs16480	chr7	24271450	C	T	-0.0108	0.0016	5.6e-11	0.2527	T	C
rs1157596	chr7	25254577	T	G	0.0096	0.0015	4.8e-10	0.3344	G	T
rs12667261	chr7	25592573	A	G	-0.0199	0.002	5.9e-24	0.1619	G	A
rs10215742	chr7	25764166	G	A	0.0246	0.0033	1.4e-13	0.05852	A	G
rs10260677	chr7	25835371	C	A	0.0235	0.0018	3.9e-38	0.1891	A	C
rs17427875	chr7	27185939	T	A	0.0141	0.0019	9.8e-14	0.2	A	T
rs4722756	chr7	28115203	G	A	-0.0243	0.0015	2.6e-59	0.6376	A	G
rs508347	chr7	28173205	C	T	-0.0472	0.0016	1.4e-199	0.7073	T	C
rs2237351	chr7	28748640	C	T	-0.0223	0.0015	2.6e-48	0.3383	T	C
rs10241908	chr7	31006844	C	T	0.0229	0.0033	6.2e-12	0.04841	T	C
rs7786669	chr7	32858726	G	A	0.0132	0.0015	6.8e-19	0.3884	A	G
rs6462426	chr7	32866197	C	T	-0.0248	0.0031	3.4e-15	0.94007	T	C
rs6462488	chr7	33626809	A	G	-0.0106	0.0017	1.3e-09	0.2181	G	A
rs17170429	chr7	33790688	G	A	-0.0109	0.0017	1.9e-10	0.2495	A	G
rs2598108	chr7	37933225	C	A	-0.0155	0.0015	6.8e-25	0.3548	A	C
rs881926	chr7	37990183	T	G	-0.0214	0.0019	3.1e-28	0.1632	G	T
rs6974574	chr7	38070471	T	A	0.0225	0.0015	1.4e-48	0.6523	A	T
rs7794103	chr7	42056667	C	T	-0.0094	0.0014	5.8e-11	0.4969	T	C
rs3801204	chr7	42148939	A	C	0.0127	0.0018	1.7e-12	0.199	C	A
rs2070971	chr7	44157984	T	G	-0.0145	0.0021	1.1e-11	0.1427	G	T
rs3213658	chr7	44986121	C	G	-0.0121	0.002	9.5e-10	0.838	G	C
rs1722136	chr7	46021777	A	C	-0.0639092	0.00994142	1.28803e-10	0.2639	C	A
rs1525832	chr7	46030012	G	A	0.0131	0.0014	1.7e-19	0.4498	A	G
rs940892	chr7	46047527	T	C	-0.0176	0.0027	6.8e-11	0.08442	C	T
rs1007358	chr7	46161757	G	A	0.0253	0.0017	5.5e-48	0.217	A	G
rs10274091	chr7	46239993	T	C	0.0164	0.0016	2.5e-25	0.5381	C	T
rs7811653	chr7	46362671	A	C	-0.0355	0.0025	3.5e-44	0.08419	C	A
rs723149	chr7	46537458	G	A	-0.0239	0.0015	2.2e-59	0.5578	A	G
rs856568	chr7	46681123	T	A	0.0108	0.0016	3.9e-11	0.2601	A	T
rs10252635	chr7	46989908	T	C	0.013	0.0017	2.8e-14	0.2278	C	T
rs334502	chr7	47509510	A	G	0.0096	0.0016	1.3e-09	0.7067	G	A
rs757657	chr7	49503298	C	A	0.0094	0.0015	1.3e-10	0.4043	A	C
rs1466163	chr7	50539508	G	A	-0.0157	0.0022	2.1e-12	0.887	A	G
rs2715094	chr7	50662755	A	G	-0.016	0.0017	3.9e-22	0.7618	G	A
rs6593279	chr7	55736277	A	G	-0.018	0.0019	1.2e-20	0.1794	G	A
rs11767454	chr7	55965209	G	C	0.0096	0.0015	2.9e-10	0.3249	C	G
rs7793921	chr7	56053188	A	G	0.0168	0.0016	1.2e-25	0.6877	G	A
rs4285372	chr7	64470975	T	C	0.0085	0.0015	7.1e-09	0.5952	C	T
rs2421292	chr7	67368654	A	G	0.0086	0.0014	3.1e-09	0.4539	G	A
rs7798357	chr7	73617935	C	G	0.0137	0.0016	9.6e-18	0.2884	G	C
rs10267271	chr7	73675089	T	C	0.0112	0.0015	8.7e-14	0.6115	C	T
rs11316	chr7	73832225	G	C	0.0096	0.0017	7.7e-09	0.7472	C	G
rs12669267	chr7	73890306	T	C	-0.0261	0.0022	1.9e-31	0.1302	C	T
rs2528795	chr7	74059164	C	T	0.0117	0.0018	2.1e-10	0.225	T	C
rs6976860	chr7	77822829	G	T	0.0144	0.0015	5.5e-22	0.3587	T	G
rs7811476	chr7	84916502	G	C	-0.0112	0.0015	3.8e-13	0.3189	C	G
rs6952361	chr7	90734663	G	T	-0.0099	0.0015	2e-11	0.385	T	G
rs6962300	chr7	91617336	A	C	-0.0204	0.0023	2e-18	0.1113	C	A
rs10269774	chr7	92624658	A	G	0.0582	0.0015	9.999987484956e-319	0.3433	G	A
rs3731321	chr7	92698451	C	T	-0.0461	0.002	3.3e-120	0.1731	T	C
rs4605988	chr7	92847768	T	C	0.0233	0.002	5.9e-30	0.138	C	T
rs2188177	chr7	93029846	T	C	0.0132	0.0015	1.3e-19	0.4595	C	T
rs2528542	chr7	93637056	C	T	0.0115	0.0014	2.7e-15	0.4405	T	C
rs7787663	chr7	95611423	A	C	0.0132	0.002	8.5e-11	0.1484	C	A
rs10270831	chr7	96078055	A	T	-0.0109	0.0018	2.8e-09	0.2002	T	A
rs971685	chr7	96416393	A	G	-0.0114	0.0015	7.3e-15	0.4376	G	A
rs1207716	chr7	97038835	C	T	-0.0114	0.0017	2.3e-11	0.2289	T	C
rs6958790	chr7	99177115	G	A	-0.0148	0.0017	8.5e-18	0.2222	A	G
rs10278040	chr7	99543750	A	G	0.034	0.0031	2.2e-28	0.05987	G	A
rs11974610	chr7	99930354	A	G	-0.0131	0.0018	7.5e-13	0.1942	G	A
rs221780	chr7	100699412	C	G	0.0135	0.002	1.7e-11	0.8441	G	C
rs3757868	chr7	100885099	A	G	0.0164	0.0019	7e-19	0.1808	G	A
rs7782121	chr7	101193338	A	G	0.017	0.0025	1.6e-11	0.91698	G	A
rs365836	chr7	102166571	G	A	-0.0122	0.0016	6.3e-14	0.267	A	G
rs1142	chr7	105115879	T	C	0.0098	0.0015	4.9e-11	0.3499	C	T
rs10259672	chr7	114381251	T	C	-0.0127	0.0016	3.1e-15	0.3829	C	T
rs12154695	chr7	116330568	T	G	-0.0113	0.0015	2.5e-13	0.325	G	T
rs10275439	chr7	121143371	G	A	0.0171	0.0015	8.8e-31	0.6173	A	G
rs2218378	chr7	122321042	G	A	0.0144	0.0015	2.8e-22	0.3753	A	G
rs11764665	chr7	122517841	A	G	0.0114	0.0017	9.2e-12	0.2575	G	A
rs17628518	chr7	124045044	A	G	-0.0115	0.0015	2.2e-14	0.3424	G	A
rs339054	chr7	128742457	G	T	-0.0092	0.0014	1.2e-10	0.4989	T	G
rs13221560	chr7	129023121	G	A	-0.0089	0.0015	4.2e-09	0.6533	A	G
rs7798321	chr7	129164200	G	A	0.0115	0.0018	3.1e-10	0.1998	A	G
rs11556924	chr7	130023656	T	C	0.0131	0.0015	2.5e-18	0.3887	C	T
rs7779498	chr7	130723587	T	C	0.022	0.0038	4.6e-09	0.03859	C	T
rs1059698	chr7	130944335	C	A	-0.0164	0.0017	2.6e-22	0.2407	A	C
rs10954312	chr7	131285012	T	C	-0.0097	0.0016	6.9e-10	0.6953	C	T
rs10954398	chr7	132946521	C	A	-0.0103	0.0014	9e-13	0.5537	A	C
rs6962887	chr7	135361034	G	T	-0.0226	0.0016	2.6e-46	0.3215	T	G
rs10224307	chr7	135629089	T	C	-0.0136	0.0014	1.7e-21	0.4745	C	T
rs4732272	chr7	137864173	G	A	0.0129	0.0016	2e-16	0.6932	A	G
rs2286196	chr7	140027335	A	G	0.0197	0.0018	3.5e-27	0.1959	G	A
rs13241668	chr7	140110352	A	G	-0.0143	0.0014	2.6e-23	0.4243	G	A
rs4577876	chr7	148675228	T	C	-0.0147	0.0016	3.2e-19	0.2684	C	T
rs822531	chr7	148932667	T	C	0.0436	0.0018	2.4e-125	0.7934	C	T
rs822553	chr7	148953726	A	G	0.0346	0.0017	2.4e-94	0.2661	G	A
rs714885	chr7	150802699	C	T	0.0088	0.0015	4.8e-09	0.6587	T	C
rs6977081	chr7	150845427	T	G	0.0277	0.0016	2.6e-71	0.3456	G	T
rs3807370	chr7	150976226	G	A	0.0227	0.0015	4e-51	0.6289	A	G
rs4725398	chr7	151242107	G	A	-0.0132	0.0015	2.4e-18	0.4073	A	G
rs2948300	chr8	8248986	T	C	-0.0113	0.0015	7.9e-15	0.4537	C	T
rs13257899	chr8	9292199	T	A	0.0152	0.0015	9.3e-23	0.3383	A	T
rs13252982	chr8	10397595	G	C	0.0096	0.0014	3.4e-11	0.5029	C	G
rs7836059	chr8	11414655	A	G	0.0124	0.0015	2.1e-17	0.4812	G	A
rs10503429	chr8	12824206	G	A	-0.0136	0.0018	2.1e-14	0.2092	A	G
rs17188586	chr8	13236386	C	G	0.0189	0.0031	7.8e-10	0.06577	G	C
rs2278945	chr8	13341642	T	C	0.0146	0.0014	9.7e-24	0.522	C	T
rs7834383	chr8	13415968	T	G	0.0177	0.0015	5.7e-31	0.359	G	T
rs7815903	chr8	13494481	A	G	0.0278	0.003	2.9e-20	0.93826	G	A
rs17221614	chr8	13497915	A	T	-0.0309	0.0026	8.6e-33	0.08893	T	A
rs7002507	chr8	19466572	T	C	-0.0158	0.0021	2.9e-14	0.1511	C	T
rs3923920	chr8	19501673	T	C	0.012	0.0014	5.9e-17	0.4678	C	T
rs297	chr8	19958860	C	T	0.0099	0.0017	6.5e-09	0.2417	T	C
rs11135743	chr8	21945497	G	A	-0.0122	0.0014	2.4e-17	0.5378	A	G
rs7823327	chr8	22704839	T	G	0.0125	0.0014	3.7e-18	0.4951	G	T
rs4291276	chr8	23316078	G	A	-0.0287	0.0017	1.9e-64	0.7672	A	G
rs7008867	chr8	23525691	A	G	0.0226	0.0017	2.7e-39	0.2356	G	A
rs9644032	chr8	23557309	G	T	-0.0162	0.0015	2.4e-27	0.631	T	G
rs4872206	chr8	23930226	A	G	-0.0163	0.0027	1.3e-09	0.0891	G	A
rs2013265	chr8	24234987	T	C	-0.0288	0.0016	2.4e-68	0.253	C	T
rs1902634	chr8	24831214	G	C	0.0103	0.0017	8.1e-10	0.7405	C	G
rs3812423	chr8	25441194	C	G	-0.0218	0.0015	3.2e-48	0.3634	G	C
rs2874670	chr8	26388142	A	G	0.0129	0.0014	6.3e-19	0.4585	G	A
rs10109417	chr8	26530784	T	C	-0.0159	0.0022	1.1e-12	0.1156	C	T
rs2640730	chr8	27647851	T	C	0.0181	0.0017	1.1e-26	0.2333	C	T
rs17384485	chr8	27703134	T	C	-0.0141	0.0016	2.5e-19	0.3258	C	T
rs2048369	chr8	28743055	C	G	-0.0111	0.0016	1.1e-11	0.2622	G	C
rs10095540	chr8	29497974	G	T	-0.0089	0.0014	8.5e-10	0.4659	T	G
rs2979510	chr8	30532688	A	G	-0.0154	0.0014	1.2e-26	0.4939	G	A
rs6468409	chr8	37483449	T	C	0.0117	0.0017	1e-11	0.782	C	T
rs2411257	chr8	38435959	C	T	-0.0122	0.0017	3.7e-13	0.2373	T	C
rs895619	chr8	38671269	A	G	0.0092	0.0015	6.6e-10	0.4137	G	A
rs4736916	chr8	41093987	T	A	-0.0092	0.0014	1.7e-10	0.4996	A	T
rs921142	chr8	41311757	C	T	-0.0117	0.0015	3.1e-15	0.4005	T	C
rs6988484	chr8	48501220	C	T	0.0238	0.0017	1.9e-46	0.2419	T	C
rs900239	chr8	48635419	G	A	-0.0097	0.0015	4.3e-10	0.6634	A	G
rs878995	chr8	48669207	T	G	-0.0222	0.0031	1.3e-12	0.05741	G	T
rs10958476	chr8	56183249	C	T	0.0483	0.0018	2.9e-162	0.2056	T	C
rs9650315	chr8	56243039	T	G	-0.0609	0.0021	3.1e-177	0.1361	G	T
rs13260778	chr8	56291816	A	G	-0.110199	0.0176959	4.74316e-10	0.05986	G	A
rs2609996	chr8	56448562	A	C	0.0175	0.0014	9.9e-34	0.4448	C	A
rs4737446	chr8	56752460	T	G	0.0232	0.0016	3e-49	0.6955	G	T
rs6994177	chr8	57171242	C	G	0.0196	0.0024	3.1e-16	0.1045	G	C
rs16925089	chr8	59654043	A	C	0.0211	0.0021	4e-23	0.1307	C	A
rs7000766	chr8	60745274	G	A	0.0122	0.0017	1.5e-13	0.7565	A	G
rs11985332	chr8	68819683	A	G	0.0133	0.0022	1.6e-09	0.127	G	A
rs7814212	chr8	71316871	G	A	0.0102	0.0017	1.7e-09	0.238	A	G
rs4133001	chr8	71806432	G	A	-0.0132	0.002	2.8e-11	0.844	A	G
rs719240	chr8	74911619	G	A	0.0158	0.0015	2.1e-24	0.3292	A	G
rs2956605	chr8	74970819	C	A	-0.0262	0.0015	3.4e-68	0.6151	A	C
rs16939034	chr8	75128348	T	C	0.0222	0.0026	4.9e-17	0.08115	C	T
rs2383966	chr8	76105564	G	C	-0.0202	0.0035	6.9e-09	0.04987	C	G
rs4735766	chr8	77187546	T	G	0.0374	0.0016	1.7e-121	0.2794	G	T
rs10504652	chr8	77253247	T	C	0.0356	0.0025	1.1e-44	0.08162	C	T
rs2304787	chr8	86556416	G	T	0.013	0.0016	3.2e-15	0.7366	T	G
rs4339600	chr8	91210055	G	A	0.0129	0.0016	1.9e-15	0.727	A	G
rs6997004	chr8	95406269	G	A	-0.0184	0.002	2.1e-20	0.1641	A	G
rs4735639	chr8	99731328	C	A	-0.0164	0.0025	3.2e-11	0.09308	A	C
rs3133577	chr8	100793314	T	C	0.0103	0.0015	2.8e-11	0.6635	C	T
rs2721940	chr8	115624054	C	A	-0.0198	0.0015	1.6e-41	0.6056	A	C
rs1005502	chr8	116155618	T	C	-0.0132	0.0017	5.8e-15	0.7298	C	T
rs4876361	chr8	116554149	A	G	-0.0231	0.0016	5.4e-47	0.7134	G	A
rs1599473	chr8	119463118	T	G	-0.0255	0.0017	2.9e-52	0.2477	G	T
rs2249015	chr8	119593412	A	G	0.0242	0.0017	4.6e-47	0.2339	G	A
rs16893014	chr8	119700360	T	C	0.0237	0.0029	1.9e-16	0.06215	C	T
rs17237275	chr8	120286137	C	T	0.0178	0.0019	7.1e-20	0.1652	T	C
rs10088006	chr8	121652881	G	A	-0.0085	0.0014	3.4e-09	0.4899	A	G
rs11779459	chr8	122968311	T	C	0.0179	0.0015	1.9e-31	0.3588	C	T
rs6982502	chr8	125467120	T	C	0.0132	0.0014	3.4e-20	0.5191	C	T
rs8180991	chr8	125488108	G	C	-0.0266	0.0017	6.7e-53	0.2338	C	G
rs4551307	chr8	127587427	G	A	-0.0152	0.002	8.3e-15	0.1766	A	G
rs4733585	chr8	127982735	A	C	0.0143	0.0018	4.1e-15	0.8098	C	A
rs10956416	chr8	128178044	C	T	0.0219	0.0017	1.4e-39	0.2466	T	C
rs12546523	chr8	128973864	A	G	0.0106	0.0014	1.7e-13	0.5171	G	A
rs7812646	chr8	129541135	A	G	-0.0204	0.002	3.9e-25	0.1539	G	A
rs7815955	chr8	129707321	T	A	-0.0478	0.0018	2.9e-156	0.2045	A	T
rs12675390	chr8	130205446	C	T	0.0109	0.0016	2e-11	0.2596	T	C
rs2467974	chr8	132747908	G	C	-0.0101	0.0015	3.4e-11	0.327	C	G
rs7830500	chr8	133596884	A	C	0.0192	0.0018	1.7e-25	0.2014	C	A
rs11166612	chr8	134588711	G	A	-0.0355	0.0015	6.4e-123	0.3678	A	G
rs11992096	chr8	134609126	C	T	0.0116	0.0015	2.3e-14	0.3489	T	C
rs12541381	chr8	134637605	A	G	-0.0373	0.0017	5.9e-108	0.2492	G	A
rs17778003	chr8	134657567	T	C	0.0227	0.0026	6.5e-19	0.09039	C	T
rs7821751	chr8	134698436	A	C	-0.033	0.0016	1.6e-91	0.7337	C	A
rs888345	chr8	139634747	A	G	-0.0108	0.0018	4.4e-09	0.8057	G	A
rs7827290	chr8	141290216	G	T	-0.0125	0.0015	6.2e-16	0.3266	T	G
rs7833723	chr8	142844250	G	A	0.0122	0.0014	2.7e-17	0.5579	A	G
rs4495442	chr8	143251666	C	T	-0.0195	0.0016	7.7e-33	0.7357	T	C
rs9650469	chr8	143755160	C	G	0.0133	0.0015	6.4e-19	0.5785	G	C
rs7464572	chr8	143946999	G	C	-0.0233	0.0015	4.1e-53	0.3879	C	G
rs13248671	chr8	144224628	A	T	0.0177	0.0014	1.5e-34	0.532	T	A
rs7866461	chr9	651127	G	C	-0.0125	0.0017	3.8e-13	0.2685	C	G
rs1598307	chr9	3837797	T	C	-0.01	0.0017	3.2e-09	0.2414	C	T
rs7866711	chr9	7031086	T	C	0.0118	0.0019	2.3e-10	0.1793	C	T
rs10046853	chr9	14456933	G	C	0.012	0.0014	1.2e-16	0.4501	C	G
rs11795150	chr9	16105963	G	T	0.009	0.0015	9e-10	0.4134	T	G
rs997694	chr9	16484872	C	T	0.0131	0.0015	2.3e-17	0.3309	T	C
rs1330304	chr9	16714631	G	C	0.0153	0.0016	1.1e-20	0.7352	C	G
rs10963680	chr9	18629285	A	G	-0.0169	0.0017	3.4e-23	0.2444	G	A
rs1932452	chr9	19011617	A	G	-0.0113	0.0015	2.6e-14	0.6195	G	A
rs10965269	chr9	22162062	G	A	-0.0188	0.0021	2.4e-19	0.1501	A	G
rs1339159	chr9	23198383	G	C	-0.01	0.0014	6.3e-12	0.4504	C	G
rs7848433	chr9	33687631	T	C	0.0273	0.0032	6.8e-18	0.04958	C	T
rs3808876	chr9	34382728	G	A	0.0114	0.0015	2.7e-14	0.5701	A	G
rs741917	chr9	35707057	T	C	0.0094	0.0016	4.7e-09	0.2832	C	T
rs13294264	chr9	35807545	T	C	0.0179	0.0018	3.2e-22	0.1783	C	T
rs2025174	chr9	35920859	G	A	-0.015	0.0016	8.2e-20	0.7273	A	G
rs4745087	chr9	71446394	T	C	0.0139	0.0022	5.9e-10	0.883	C	T
rs12683427	chr9	73495052	T	C	0.0097	0.0016	1.4e-09	0.2857	C	T
rs10869317	chr9	74083503	T	C	-0.011	0.0015	2.7e-13	0.6505	C	T
rs3814115	chr9	75889813	C	T	0.0216	0.0015	2.2e-44	0.3259	T	C
rs11144688	chr9	75927370	A	G	-0.05	0.0023	1.1e-100	0.1238	G	A
rs868969	chr9	75962904	A	T	-0.0096	0.0015	1.7e-10	0.6386	T	A
rs11144742	chr9	76074901	C	G	-0.0226	0.0026	1e-17	0.08606	G	C
rs958225	chr9	76144789	A	T	0.0349	0.0033	2.4e-26	0.05367	T	A
rs11144779	chr9	76177783	C	T	-0.0146	0.0016	3.5e-19	0.3045	T	C
rs952503	chr9	76216499	G	A	-0.0102	0.0015	1.1e-11	0.3785	A	G
rs1332029	chr9	80736456	A	G	-0.0122	0.0014	2.2e-17	0.5579	G	A
rs870713	chr9	81612243	A	C	-0.0117	0.0015	4.1e-15	0.5227	C	A
rs1330816	chr9	82479004	T	C	0.0179	0.0018	3e-23	0.1936	C	T
rs296889	chr9	83980656	A	G	0.0246	0.0016	3.8e-51	0.2609	G	A
rs1854948	chr9	86418623	C	T	-0.0128	0.0015	1.1e-16	0.3558	T	C
rs353785	chr9	86484447	C	T	0.0262	0.0014	8.7e-75	0.5028	T	C
rs10125155	chr9	87278872	C	T	0.0187	0.0027	3.6e-12	0.08302	T	C
rs10746837	chr9	88258738	A	G	-0.0271	0.0015	2e-76	0.5735	G	A
rs10820860	chr9	91491321	C	T	0.016	0.0016	5e-24	0.2943	T	C
rs10761129	chr9	91724039	T	C	-0.0191	0.0016	2.3e-34	0.6709	C	T
rs9969804	chr9	92666838	C	A	-0.0245	0.0014	7.6e-65	0.5634	A	C
rs16909150	chr9	93454464	T	C	0.021	0.0023	1.1e-19	0.1096	C	T
rs10761256	chr9	93684413	G	C	-0.015	0.0016	8.1e-21	0.2884	C	G
rs1257763	chr9	94131663	G	A	-0.0632	0.0038	3.3e-61	0.95422	A	G
rs7866254	chr9	94141187	A	G	-0.0227	0.0018	6.9e-37	0.2045	G	A
rs13283037	chr9	94256238	A	G	0.0171	0.0015	4.5e-29	0.3531	G	A
rs7044650	chr9	94640275	G	A	-0.0274	0.0029	4.8e-21	0.94329	A	G
rs3802455	chr9	95018710	C	G	-0.0124	0.0019	2.4e-11	0.199	G	C
rs357564	chr9	95447312	A	G	-0.0391	0.0016	3.8e-127	0.3434	G	A
rs16909975	chr9	95544847	A	G	0.0353	0.0023	4e-51	0.1116	G	A
rs17370391	chr9	95557687	C	T	0.0313	0.002	6.8e-58	0.1746	T	C
rs1984119	chr9	95606479	C	T	-0.0406	0.0017	1.3e-127	0.2608	T	C
rs4743120	chr9	95635177	C	T	0.0274	0.0015	5e-75	0.6296	T	C
rs4743124	chr9	95639527	T	C	0.0431	0.0021	7.1e-94	0.1395	C	T
rs7870753	chr9	96439303	G	A	0.0444	0.0017	3.8e-146	0.2191	A	G
rs1034097	chr9	97624164	C	G	-0.0154	0.0021	3.5e-13	0.8613	G	C
rs12001675	chr9	98031425	A	G	-0.0151	0.0017	7.2e-18	0.2166	G	A
rs1028653	chr9	98889666	A	G	0.0101	0.0016	6.3e-10	0.2774	G	A
rs989393	chr9	98981054	C	T	-0.0197	0.0016	1.3e-35	0.2866	T	C
rs44466	chr9	99167967	G	C	-0.0132	0.0018	3.5e-13	0.2011	C	G
rs2222133	chr9	106154791	C	T	-0.0254	0.0015	7.9e-61	0.3222	T	C
rs902144	chr9	106415290	C	G	0.0197	0.0014	1.9e-42	0.4823	G	C
rs2451948	chr9	106755927	G	A	0.0242	0.002	6.1e-34	0.169	A	G
rs7033661	chr9	106873337	G	A	0.0279	0.0015	6.4e-77	0.3558	A	G
rs7029669	chr9	107106577	C	T	0.0128	0.0016	2.3e-15	0.2778	T	C
rs2275496	chr9	108879347	T	C	-0.0105	0.0014	3.6e-13	0.4529	C	T
rs4289885	chr9	110170991	T	C	0.0112	0.0014	9e-15	0.4682	C	T
rs1049927	chr9	110256475	C	T	-0.0185	0.0021	1.3e-18	0.1328	T	C
rs10980536	chr9	110713094	T	C	0.0106	0.0014	2.3e-13	0.4324	C	T
rs7866715	chr9	110944945	T	G	0.011	0.0014	2.3e-14	0.5543	G	T
rs10817133	chr9	111029694	G	A	-0.0218	0.0017	1.3e-38	0.2494	A	G
rs10441737	chr9	111539305	T	C	-0.0186	0.0015	9e-35	0.6552	C	T
rs7854787	chr9	112105887	T	A	-0.0101	0.0016	8.9e-10	0.2532	A	T
rs7863188	chr9	112341446	T	A	-0.0126	0.0017	4.1e-13	0.7816	A	T
rs7854197	chr9	113547493	A	G	-0.0194	0.0024	1.9e-15	0.09933	G	A
rs902496	chr9	114227496	T	G	0.013	0.002	3.4e-11	0.835	G	T
rs7043999	chr9	114255133	G	T	0.0128	0.0015	7.1e-17	0.363	T	G
rs1490741	chr9	114270060	A	G	-0.0107	0.0016	6.6e-11	0.2774	G	A
rs1249741	chr9	114289567	A	T	-0.015	0.0015	2.1e-24	0.4765	T	A
rs2482080	chr9	115107405	G	T	-0.0144	0.0015	4.6e-23	0.4214	T	G
rs12002061	chr9	115723200	C	T	-0.0361	0.0026	3.1e-42	0.08068	T	C
rs6478204	chr9	115778634	C	T	-0.0154	0.0014	2.2e-26	0.5866	T	C
rs916561	chr9	116076035	C	A	-0.0247	0.0028	3.6e-19	0.07221	A	C
rs452312	chr9	116203874	A	G	-0.0136	0.0015	2.2e-19	0.4179	G	A
rs7853634	chr9	116359774	C	T	-0.0413	0.0018	5.7e-119	0.1977	T	C
rs17220352	chr9	116485780	G	A	0.0115	0.0017	7e-12	0.2354	A	G
rs2416564	chr9	116608400	T	C	-0.0217	0.0015	1.3e-49	0.5949	C	T
rs11794984	chr9	119890592	T	C	-0.0134	0.0015	1e-18	0.6422	C	T
rs4836831	chr9	120734292	T	C	-0.0175	0.0016	1.4e-28	0.6966	C	T
rs16910253	chr9	120986552	C	G	0.0238	0.0025	5.6e-22	0.09302	G	C
rs306784	chr9	121310374	T	G	0.0103	0.0015	6.1e-12	0.3731	G	T
rs4837870	chr9	121527783	G	A	0.0108	0.0015	3.8e-12	0.7033	A	G
rs10818577	chr9	121650912	C	G	0.0131	0.0017	3.8e-14	0.2408	G	C
rs587364	chr9	122998584	C	T	-0.0179	0.0021	4.9e-17	0.861	T	C
rs2536951	chr9	123884240	G	A	0.0097	0.0017	9.2e-09	0.247	A	G
rs610116	chr9	126893166	C	A	0.0167	0.0016	1.2e-24	0.7378	A	C
rs7466269	chr9	130588697	G	A	-0.0325	0.0015	2.7e-103	0.3491	A	G
rs2810489	chr9	134057578	A	G	0.0168	0.0016	9e-25	0.2753	G	A
rs11103387	chr9	136216033	T	C	-0.0235	0.0015	1e-54	0.382	C	T
rs7849585	chr9	136220024	T	G	0.03	0.0015	1.5e-85	0.3297	G	T
rs12380852	chr9	136226827	C	T	0.0744729	0.012205	1.04857e-09	0.17949	T	C
rs3923776	chr9	136436769	C	G	0.0227	0.0016	1.9e-45	0.2851	G	C
rs6874	chr9	136723384	T	C	-0.0205	0.0023	2.5e-18	0.1223	C	T
rs7896371	chr10	1686832	T	C	0.0104	0.0015	1.8e-12	0.4549	C	T
rs9423477	chr10	3124029	A	G	0.0092	0.0015	6.6e-10	0.4653	G	A
rs3740607	chr10	3147188	T	C	-0.0096	0.0015	4.1e-11	0.4961	C	T
rs7908994	chr10	4966191	T	C	-0.0389	0.0022	4.1e-67	0.1197	C	T
rs1539445	chr10	5609800	G	A	-0.0165	0.0025	2.2e-11	0.8991	A	G
rs7091821	chr10	6856257	G	T	0.0105	0.0015	3.6e-12	0.6268	T	G
rs2249698	chr10	7423027	A	C	-0.0138	0.0018	5.7e-14	0.1922	C	A
rs12261792	chr10	11867897	T	G	0.0173	0.0018	3.8e-21	0.1955	G	T
rs2399786	chr10	12173181	C	T	0.0133	0.0014	1.9e-20	0.4853	T	C
rs3781070	chr10	12782716	G	A	0.0111	0.0017	2.3e-10	0.2167	A	G
rs12779328	chr10	12901973	T	C	-0.0301	0.0016	6.6e-79	0.2833	C	T
rs1801222	chr10	17114152	G	A	0.0095	0.0015	2.7e-10	0.6465	A	G
rs7899812	chr10	21436523	G	A	-0.0105	0.0017	1.1e-09	0.2397	A	G
rs10828466	chr10	23498369	C	T	0.0145	0.0015	3.4e-21	0.3299	T	C
rs951859	chr10	24766911	T	C	-0.0146	0.0015	2.2e-21	0.6522	C	T
rs11014285	chr10	24889935	A	G	0.024	0.0021	1.6e-31	0.1651	G	A
rs11014382	chr10	25074199	T	C	0.0113	0.0015	7.9e-14	0.352	C	T
rs12771357	chr10	27584804	G	A	0.0181	0.0017	6.3e-26	0.2233	A	G
rs2007516	chr10	27661438	T	C	0.013	0.0015	6.1e-18	0.3723	C	T
rs4749274	chr10	27896189	A	G	0.0137	0.0014	2.2e-21	0.5285	G	A
rs332126	chr10	28556866	A	G	-0.0205	0.0018	1e-29	0.7998	G	A
rs12411515	chr10	28652298	T	C	-0.0168	0.0016	2.9e-27	0.3141	C	T
rs2488003	chr10	30178876	A	G	0.0131	0.0015	4.3e-18	0.646	G	A
rs1417568	chr10	30812382	G	A	-0.0122	0.0014	3e-17	0.5616	A	G
rs2797901	chr10	31051499	C	T	0.0118	0.0014	3.3e-16	0.5624	T	C
rs10826995	chr10	31793730	C	T	-0.0108	0.0016	1.7e-11	0.2864	T	C
rs3740237	chr10	32268664	C	G	0.0138	0.0021	4.1e-11	0.1431	G	C
rs7077783	chr10	34347892	T	C	-0.0139	0.0021	4.5e-11	0.1467	C	T
rs2435381	chr10	43183348	T	C	0.0107	0.0016	3.1e-11	0.2699	C	T
rs10857472	chr10	49326554	A	G	-0.0089	0.0014	7e-10	0.4581	G	A
rs17721694	chr10	50407533	T	C	-0.012	0.0017	3.5e-12	0.2214	C	T
rs10740130	chr10	51071244	T	G	0.0099	0.0017	3.8e-09	0.2508	G	T
rs10997909	chr10	51522346	G	T	0.0168	0.0016	6.3e-25	0.2668	T	G
rs1171615	chr10	59709332	T	C	-0.0239	0.0017	5.5e-43	0.7666	C	T
rs10821592	chr10	59773847	G	A	0.018	0.002	7.2e-19	0.1434	A	G
rs10994064	chr10	59895850	C	T	0.0179	0.0029	4.9e-10	0.07051	T	C
rs7089424	chr10	61992400	G	T	0.0155	0.0015	3.1e-24	0.3318	T	G
rs224082	chr10	62806498	T	C	0.0158	0.0015	4.8e-26	0.3864	C	T
rs6479905	chr10	63555471	G	A	-0.0166	0.0014	7.5e-31	0.474	A	G
rs10823149	chr10	68175639	T	G	0.023	0.0015	1.2e-56	0.5403	G	T
rs1080639	chr10	68322273	C	T	-0.0191	0.0027	1.3e-12	0.08068	T	C
rs12221107	chr10	68573105	T	C	-0.0382	0.0027	2.3e-44	0.08425	C	T
rs10998344	chr10	68629359	T	C	0.0121	0.0015	1.9e-16	0.573	C	T
rs11001286	chr10	75075224	T	C	0.0135	0.0017	7.9e-15	0.2159	C	T
rs11001399	chr10	75461986	C	A	-0.0091	0.0015	4.2e-10	0.5526	A	C
rs7095225	chr10	76692865	T	G	0.0088	0.0014	8e-10	0.4669	G	T
rs1769762	chr10	79163869	T	C	-0.024	0.0018	6.8e-41	0.7937	C	T
rs7916441	chr10	79165820	C	G	-0.0261	0.0015	3.2e-72	0.429	G	C
rs4980067	chr10	79376373	A	C	-0.0285	0.0014	1.9e-86	0.5185	C	A
rs2279337	chr10	79404401	G	A	-0.0126	0.0017	4e-14	0.2568	A	G
rs7910211	chr10	79468622	C	T	0.0173	0.002	1.5e-18	0.1775	T	C
rs2607863	chr10	86264686	C	T	-0.019	0.0031	1.4e-09	0.95522	T	C
rs10887652	chr10	86751480	G	C	-0.0108	0.0015	4.2e-13	0.381	C	G
rs796945	chr10	88391080	T	C	0.0106	0.0015	2.5e-12	0.6394	C	T
rs10881893	chr10	91167510	G	A	0.0185	0.0019	7e-23	0.18	A	G
rs2450445	chr10	91278773	A	G	0.0236	0.0015	9e-53	0.3285	G	A
rs12411618	chr10	92292407	T	C	0.0133	0.002	5e-11	0.1446	C	T
rs7078243	chr10	92654506	C	A	-0.0085	0.0014	3.3e-09	0.5166	A	C
rs6583871	chr10	93214372	T	G	-0.0152	0.0016	3.3e-20	0.7297	G	T
rs7919319	chr10	93712267	A	G	-0.0089	0.0015	1.7e-09	0.5953	G	A
rs11188101	chr10	94881524	A	T	0.0128	0.0019	2.4e-11	0.1688	T	A
rs12263592	chr10	96091675	A	G	0.0204	0.0022	7.8e-20	0.1179	G	A
rs10882728	chr10	96147641	A	C	-0.0204	0.0015	5.7e-41	0.3302	C	A
rs878177	chr10	98254058	T	C	0.0163	0.0015	5.6e-27	0.3324	C	T
rs11599750	chr10	100045685	T	C	-0.0152	0.0015	2.1e-25	0.3962	C	T
rs1800662	chr10	100529321	A	C	-0.0109	0.0017	4e-10	0.2228	C	A
rs2181834	chr10	100901494	T	G	0.0214	0.0014	7.9e-50	0.5575	G	T
rs3127230	chr10	101632746	C	T	0.0142	0.0015	1.8e-20	0.3375	T	C
rs7899004	chr10	102581678	C	T	-0.0288	0.0014	2.4e-88	0.4209	T	C
rs3977755	chr10	102660453	T	C	0.0139	0.0016	2.9e-17	0.2804	C	T
rs11191393	chr10	102767673	G	C	0.018	0.002	1.5e-18	0.1444	C	G
rs10883887	chr10	103597424	A	G	-0.0108	0.0015	1.9e-13	0.4171	G	A
rs11191786	chr10	103732791	G	A	0.0218	0.0017	3.3e-36	0.2225	A	G
rs10883931	chr10	103864197	T	C	0.0102	0.0015	3e-12	0.4271	C	T
rs10787453	chr10	112624298	A	G	0.0101	0.0015	2.2e-11	0.6422	G	A
rs7094463	chr10	112952224	G	A	-0.0099	0.0015	1.2e-11	0.5322	A	G
rs10787476	chr10	113139155	C	A	0.0242	0.003	4.4e-16	0.06227	A	C
rs2484294	chr10	114032303	A	G	0.0146	0.0016	7.7e-19	0.7321	G	A
rs721041	chr10	114375585	G	A	0.0127	0.0015	3.4e-17	0.6258	A	G
rs7912108	chr10	118267368	A	G	-0.0115	0.0014	2.3e-15	0.4301	G	A
rs11593630	chr10	118731994	T	C	-0.0137	0.0015	9.8e-19	0.3595	C	T
rs11198820	chr10	119201531	C	G	0.0252	0.0024	1.2e-26	0.1019	G	C
rs11198898	chr10	119358980	C	A	-0.029	0.0017	5.8e-64	0.767	A	C
rs2234962	chr10	119670121	C	T	-0.0198	0.0017	1.2e-29	0.2162	T	C
rs7902581	chr10	121645966	G	C	-0.0166	0.0016	5.1e-24	0.2719	C	G
rs12571218	chr10	122388072	G	A	-0.0321	0.0028	1.4e-29	0.06344	A	G
rs4612730	chr10	122416936	A	G	0.0194	0.0014	3.5e-41	0.4836	G	A
rs17152232	chr10	124710358	G	A	0.0209	0.0015	1.2e-41	0.3151	A	G
rs2559515	chr10	124825356	G	A	-0.0167	0.0017	2e-22	0.2333	A	G
rs9419387	chr10	131944854	A	G	0.0106	0.0015	4.6e-13	0.3841	G	A
rs2272566	chr11	244552	G	A	-0.0112	0.0014	9.7e-15	0.5195	A	G
rs592373	chr11	1869760	A	G	-0.013	0.0015	1.4e-17	0.6307	G	A
rs11600952	chr11	2080053	A	G	-0.0212	0.0019	6.8e-29	0.1829	G	A
rs4320932	chr11	2150371	C	T	-0.0316	0.0019	1.5e-61	0.1956	T	C
rs7924316	chr11	2152217	G	T	0.0562947	0.0099567	1.568e-08	0.40845	T	G
rs1971929	chr11	2752141	C	G	0.038	0.002	5.3e-77	0.149	G	C
rs231872	chr11	2765831	T	G	0.0108	0.0015	7.1e-13	0.627	G	T
rs234857	chr11	2831299	C	T	-0.0097	0.0016	1.6e-09	0.3043	T	C
rs7926589	chr11	9498156	G	T	0.0097	0.0014	2e-11	0.517	T	G
rs7123728	chr11	10141659	G	T	-0.0122	0.0014	3.2e-17	0.5462	T	G
rs3206824	chr11	11964514	C	T	0.0158	0.0017	9.3e-22	0.7468	T	C
rs3750940	chr11	12001351	G	A	0.0111	0.0018	1.4e-09	0.1866	A	G
rs10831894	chr11	12659186	A	G	0.0218	0.0014	1.3e-51	0.456	G	A
rs3915398	chr11	12773399	G	A	0.0232	0.0024	1.1e-22	0.111	A	G
rs11022538	chr11	12896739	A	T	-0.0182	0.0031	3.6e-09	0.05736	T	A
rs10832008	chr11	13254782	T	C	-0.0163	0.0021	8.4e-15	0.1351	C	T
rs1481891	chr11	13289171	C	T	-0.0158	0.0016	2e-23	0.7112	T	C
rs2060076	chr11	14384210	T	C	-0.0159	0.0015	5.4e-25	0.3516	C	T
rs12417788	chr11	14676912	T	C	-0.0172	0.0025	1.1e-11	0.09185	C	T
rs757081	chr11	17330136	G	C	0.0182	0.0015	6.5e-33	0.3308	C	G
rs2056246	chr11	18029899	T	G	0.0124	0.0015	4.5e-17	0.3878	G	T
rs10766473	chr11	18379984	A	G	0.0105	0.0014	3.7e-13	0.5541	G	A
rs10832956	chr11	18624121	C	T	-0.0221	0.0016	4.9e-41	0.7387	T	C
rs4757903	chr11	20204266	C	G	0.0129	0.0018	8.8e-13	0.2685	G	C
rs7945211	chr11	27451230	C	T	-0.0093	0.0015	1.5e-10	0.5169	T	C
rs7123034	chr11	29041849	T	G	0.0107	0.0014	1e-13	0.5381	G	T
rs10835657	chr11	30342135	T	C	-0.0202	0.0016	2.3e-35	0.2754	C	T
rs374796	chr11	31211741	G	C	0.0088	0.0015	5.5e-09	0.6185	C	G
rs2746602	chr11	33738934	T	G	0.0092	0.0015	2.3e-09	0.6814	G	T
rs6484787	chr11	35468343	A	G	0.0121	0.0015	2.1e-15	0.6399	G	A
rs1138807	chr11	36081678	G	A	0.0095	0.0016	2.8e-09	0.3283	A	G
rs3853291	chr11	44347927	A	G	-0.0099	0.0014	8.6e-12	0.5519	G	A
rs731102	chr11	45206423	A	G	-0.0109	0.0014	5e-14	0.4502	G	A
rs7934681	chr11	45937086	A	G	0.0319	0.0025	2.9e-37	0.90417	G	A
rs10838588	chr11	46251275	G	A	-0.0161	0.0018	9.9e-20	0.2293	A	G
rs3136447	chr11	46722818	C	T	0.0104	0.0018	8.1e-09	0.2209	T	C
rs3817335	chr11	47622339	A	T	-0.0291	0.0015	3.5e-84	0.3525	T	A
rs10769382	chr11	48568863	G	A	-0.0148	0.0015	3.3e-23	0.6214	A	G
rs3904265	chr11	50400948	G	A	0.0181	0.003	1.4e-09	0.06232	A	G
rs4540846	chr11	55067727	G	A	-0.0127	0.0014	1.7e-18	0.5394	A	G
rs11231529	chr11	55913860	A	G	-0.0129	0.0015	1.5e-17	0.3446	G	A
rs10896138	chr11	56236113	A	G	0.0186	0.0018	1.2e-25	0.2039	G	A
rs2155231	chr11	57269774	G	T	0.0114	0.0015	6.8e-15	0.4098	T	G
rs12099131	chr11	57580514	A	G	0.0134	0.0021	3.1e-10	0.1445	G	A
rs1783980	chr11	57680853	T	C	-0.0126	0.0014	2.3e-18	0.5599	C	T
rs10896788	chr11	58525503	A	G	0.0139	0.0017	4.5e-16	0.233	G	A
rs17594827	chr11	59721685	T	A	-0.0241	0.0034	2.1e-12	0.04689	A	T
rs612010	chr11	63823533	A	G	0.0086	0.0014	2.4e-09	0.5313	G	A
rs4601790	chr11	65586435	G	A	-0.014	0.0016	1.3e-17	0.2666	A	G
rs641018	chr11	65887922	C	G	-0.0152	0.0018	8.1e-17	0.1974	G	C
rs1625595	chr11	66310658	T	C	0.0101	0.0015	4.4e-12	0.4791	C	T
rs2282529	chr11	66416669	A	G	-0.0113	0.0015	2.3e-14	0.4303	G	A
rs3923203	chr11	67067723	C	G	-0.0269	0.0015	2.3e-69	0.3668	G	C
rs1790747	chr11	67423978	C	T	0.0169	0.0028	2e-09	0.07495	T	C
rs11603991	chr11	67600451	T	C	-0.0107	0.0015	7.2e-13	0.3928	C	T
rs2514025	chr11	67689624	C	T	0.0129	0.0015	2.9e-18	0.4315	T	C
rs2508836	chr11	68323797	T	C	-0.019	0.0016	2.4e-33	0.3062	C	T
rs2277268	chr11	68406654	A	G	0.0195	0.0029	1.1e-11	0.07139	G	A
rs4988321	chr11	68406721	A	G	-0.0382	0.0036	2.8e-26	0.05244	G	A
rs7948782	chr11	68651255	C	T	0.0315	0.002	8.4e-54	0.8531	T	C
rs10792020	chr11	69075023	A	G	-0.0175	0.0014	1.4e-33	0.504	G	A
rs1542335	chr11	69163652	A	T	0.0148	0.0015	1e-23	0.3953	T	A
rs11263510	chr11	69354580	G	C	0.0244	0.0022	1.6e-29	0.1399	C	G
rs12146455	chr11	69449783	A	G	0.0296	0.0023	9.8e-37	0.1203	G	A
rs10796819	chr11	69461615	G	T	-0.0118	0.0014	3.4e-16	0.4715	T	G
rs7939552	chr11	70088750	C	G	-0.0157	0.0015	9.8e-25	0.6444	G	C
rs3781923	chr11	72644179	T	C	-0.0121	0.0015	3.8e-15	0.6732	C	T
rs10793091	chr11	74559047	T	C	0.0137	0.0014	3.6e-21	0.475	C	T
rs11236210	chr11	74679974	A	G	0.0158	0.0016	8.3e-22	0.2788	G	A
rs673731	chr11	74855355	A	G	-0.0189	0.0017	9e-28	0.2175	G	A
rs606452	chr11	75565133	C	A	-0.0488	0.0021	2.5e-121	0.8668	A	C
rs17450692	chr11	76423879	T	C	0.0118	0.0015	2.4e-14	0.3239	C	T
rs4145700	chr11	77704520	A	G	0.0113	0.0015	6.5e-14	0.3514	G	A
rs3886195	chr11	77856538	A	G	-0.0172	0.0023	1.7e-13	0.1011	G	A
rs17148514	chr11	85815356	T	C	-0.0176	0.0017	1.2e-24	0.2406	C	T
rs10898439	chr11	86148441	C	G	-0.0098	0.0014	1e-11	0.5328	G	C
rs2291813	chr11	86245436	T	G	0.0304	0.004	1.9e-14	0.03853	G	T
rs319016	chr11	89447940	G	A	-0.0094	0.0014	7.7e-11	0.5346	A	G
rs2289123	chr11	89491550	T	G	0.0128	0.0018	4.1e-12	0.7671	G	T
rs3019011	chr11	89563196	G	A	-0.0108	0.0014	5.4e-14	0.445	A	G
rs735028	chr11	95568537	G	C	0.0102	0.0015	4.9e-12	0.4748	C	G
rs10765754	chr11	95614861	G	A	0.011	0.0015	7.4e-13	0.352	A	G
rs8504	chr11	102232869	A	G	-0.0089	0.0015	5.9e-09	0.3417	G	A
rs17728834	chr11	110366733	T	A	0.0137	0.0017	1e-15	0.2372	A	T
rs12269901	chr11	117103213	C	G	-0.0136	0.0016	1.9e-17	0.2938	G	C
rs10892246	chr11	118610716	G	A	0.0132	0.0015	2.6e-18	0.6081	A	G
rs640120	chr11	118748128	C	A	0.0155	0.0021	4.8e-13	0.8722	A	C
rs3922	chr11	118894891	G	A	-0.0097	0.0015	6e-11	0.4108	A	G
rs640603	chr11	119093620	A	G	-0.0096	0.0015	4.6e-10	0.3513	G	A
rs10502235	chr11	120341714	G	A	-0.0242	0.0019	1.1e-35	0.16	A	G
rs633943	chr11	121838475	A	G	-0.0113	0.0015	2.4e-13	0.3276	G	A
rs2850791	chr11	122022537	C	T	0.0122	0.0016	1.3e-14	0.6909	T	C
rs7107012	chr11	122959105	A	G	0.0177	0.0014	1.7e-34	0.572	G	A
rs12222197	chr11	125955329	T	G	0.0162	0.0015	4.9e-28	0.5713	G	T
rs608251	chr11	126109862	A	C	-0.0135	0.0017	5e-16	0.2634	C	A
rs11560876	chr11	128082698	T	G	-0.0184	0.002	2.4e-19	0.1825	G	T
rs7126621	chr11	128576292	A	G	-0.0117	0.0014	8.5e-16	0.4604	G	A
rs654723	chr11	128716260	A	C	0.0126	0.0015	2.6e-17	0.6238	C	A
rs531236	chr11	128790979	G	C	-0.0172	0.0015	1.3e-28	0.3227	C	G
rs498870	chr11	129040465	C	T	0.0173	0.002	7.8e-18	0.1626	T	C
rs495360	chr12	218255	A	C	-0.0121	0.0015	7.2e-16	0.4967	C	A
rs11612228	chr12	467818	T	C	0.0262	0.0015	1.5e-65	0.3497	C	T
rs9861	chr12	563206	A	G	0.0128	0.0015	1.9e-17	0.354	G	A
rs2286029	chr12	906465	G	T	0.009	0.0014	4.7e-10	0.4291	T	G
rs2968894	chr12	1144233	G	A	0.0107	0.0016	2.7e-11	0.272	A	G
rs6489283	chr12	1384393	G	T	-0.0222	0.0026	4.4e-18	0.08746	T	G
rs7314303	chr12	2925324	T	C	0.0092	0.0015	1.4e-09	0.4148	C	T
rs7296615	chr12	3241513	G	A	0.0181	0.0025	1.1e-12	0.08828	A	G
rs3217795	chr12	4276898	G	A	-0.0189	0.0026	5e-13	0.09261	A	G
rs3217862	chr12	4289921	G	T	-0.0157	0.0019	9.3e-16	0.1759	T	G
rs10849094	chr12	4567733	G	C	0.021	0.0031	9.3e-12	0.05835	C	G
rs12964	chr12	6463025	C	T	-0.0094	0.0014	4e-11	0.4952	T	C
rs7132012	chr12	8679607	G	A	0.0128	0.0015	5e-17	0.3299	A	G
rs4883201	chr12	8929985	G	A	-0.0183	0.0024	9.2e-15	0.102	A	G
rs2900208	chr12	11725530	A	C	0.029	0.0015	7.5e-83	0.3459	C	A
rs7964189	chr12	12688801	T	C	-0.0312	0.0024	3.1e-37	0.09699	C	T
rs7294646	chr12	13049085	G	C	0.0128	0.0015	1.1e-17	0.6151	C	G
rs12425125	chr12	14260189	T	C	0.023	0.0031	2.9e-13	0.05876	C	T
rs6488674	chr12	14335980	G	T	-0.0151	0.0014	1.4e-25	0.5382	T	G
rs1025950	chr12	20355879	T	C	0.0092	0.0014	2.1e-10	0.4715	C	T
rs10770705	chr12	20704533	C	A	-0.0231	0.0015	1.3e-52	0.6719	A	C
rs11046170	chr12	21704475	T	G	0.0095	0.0016	6.1e-09	0.2751	G	T
rs7132135	chr12	24048242	T	G	0.0226	0.0017	1.7e-38	0.2098	G	T
rs7977148	chr12	25971901	G	A	0.0111	0.0014	2e-14	0.5563	A	G
rs10492367	chr12	27862037	T	G	-0.0183	0.0018	1.5e-23	0.19	G	T
rs7953528	chr12	27864226	A	T	0.0146	0.0019	1.7e-14	0.1776	T	A
rs2881556	chr12	27915096	A	G	0.014	0.0024	6.7e-09	0.90762	G	A
rs3910902	chr12	27956215	A	T	0.012	0.0015	5.6e-16	0.6031	T	A
rs7957918	chr12	28057665	G	A	0.0292	0.0034	9e-18	0.05104	A	G
rs231210	chr12	28084361	T	G	0.0169	0.0016	1.3e-27	0.3465	G	T
rs12229872	chr12	28137845	T	C	0.0215	0.0016	4.3e-40	0.2732	C	T
rs10843167	chr12	28429860	G	A	-0.0395	0.0015	1.4e-143	0.3113	A	G
rs1383386	chr12	28883514	C	T	0.0131	0.0014	4.3e-20	0.4594	T	C
rs4931135	chr12	29037328	G	A	-0.0158	0.0017	8e-20	0.7849	A	G
rs10843390	chr12	29344058	T	C	0.0214	0.0016	3.6e-41	0.2753	C	T
rs7326	chr12	30629367	G	A	0.0106	0.0014	9.4e-14	0.5233	A	G
rs6487998	chr12	31643947	T	C	-0.013	0.0016	1.1e-15	0.7329	C	T
rs4384452	chr12	33877091	C	T	0.0106	0.0018	5.4e-09	0.8085	T	C
rs1427266	chr12	40315120	T	C	0.0084	0.0014	5e-09	0.5424	C	T
rs1318490	chr12	42662042	T	C	-0.0088	0.0015	4.7e-09	0.3731	C	T
rs10880868	chr12	45928666	T	C	-0.0134	0.0018	1.6e-14	0.2095	C	T
rs2241960	chr12	46186835	G	A	0.0111	0.0016	4.6e-12	0.2821	A	G
rs957128	chr12	46213191	A	G	-0.0343	0.0045	2e-14	0.03239	G	A
rs10785628	chr12	46460893	G	T	0.0234	0.0015	1.1e-51	0.6851	T	G
rs17691418	chr12	46934609	C	T	0.0384	0.0037	9.6e-25	0.04063	T	C
rs1793958	chr12	47998650	G	A	-0.0121	0.0015	4.3e-16	0.6236	A	G
rs11503875	chr12	48370718	A	T	-0.0296	0.0042	2.4e-12	0.02836	T	A
rs6580689	chr12	48652048	T	C	0.0094	0.0014	7.4e-11	0.5788	C	T
rs833830	chr12	48944469	G	C	-0.0159	0.0026	7.1e-10	0.91195	C	G
rs7978559	chr12	50794855	A	G	0.0179	0.0015	1.7e-31	0.3176	G	A
rs11170394	chr12	53070188	C	T	0.0266	0.0026	2e-25	0.09413	T	C
rs17100291	chr12	53539050	G	A	0.0304	0.0042	6.7e-13	0.03011	A	G
rs4759286	chr12	53686236	C	A	-0.0147	0.0019	2.3e-14	0.1714	A	C
rs2306694	chr12	56286852	G	A	0.04	0.0028	6.2e-45	0.07004	A	G
rs2277339	chr12	56752285	G	T	-0.024	0.0024	5.5e-24	0.1035	T	G
rs715948	chr12	57139199	C	T	-0.013	0.0016	3.6e-16	0.6909	T	C
rs1669296	chr12	57546293	C	T	0.0131	0.0021	3.1e-10	0.1359	T	C
rs10783856	chr12	57855460	G	A	-0.0224	0.0015	1.1e-47	0.3106	A	G
rs7397895	chr12	58588806	C	T	0.0092	0.0014	2.1e-10	0.5141	T	C
rs17122659	chr12	59563142	G	A	0.0261	0.0023	6.4e-30	0.1137	A	G
rs6581551	chr12	64355592	G	A	0.0097	0.0015	3.7e-10	0.6669	A	G
rs6581626	chr12	65317598	G	A	-0.02	0.0014	2.3e-44	0.5332	A	G
rs17178006	chr12	65324519	G	T	-0.0302	0.0024	3.6e-36	0.1075	T	G
rs4254112	chr12	65579002	G	A	0.0193	0.0016	7.2e-34	0.7199	A	G
rs7972091	chr12	65734867	C	T	-0.0346	0.0029	3.3e-33	0.92961	T	C
rs7133699	chr12	65745916	A	G	-0.0142	0.0017	2.4e-16	0.217	G	A
rs11175915	chr12	65776163	G	C	0.0345	0.003	1.1e-30	0.06466	C	G
rs7961706	chr12	65848118	A	G	-0.028	0.0029	2.4e-22	0.06671	G	A
rs1038196	chr12	65949620	C	G	-0.0558	0.0014	0	0.5132	G	C
rs1871675	chr12	66017912	G	A	-0.0258	0.0015	8.1e-66	0.3672	A	G
rs1168754	chr12	66137019	G	C	0.0166	0.0016	1.6e-25	0.7317	C	G
rs7966561	chr12	66178649	G	A	0.0154	0.0015	2.6e-24	0.3542	A	G
rs7960957	chr12	68508972	T	C	-0.027	0.004	1.5e-11	0.03508	C	T
rs7295234	chr12	69417589	C	A	-0.0107	0.0015	4.9e-12	0.3041	A	C
rs10748128	chr12	69433878	T	G	0.0361	0.0015	1.7e-121	0.3446	G	T
rs10878992	chr12	69461420	A	G	-0.0202	0.0017	8.3e-33	0.2515	G	A
rs983168	chr12	71008576	T	C	0.0095	0.0016	4e-09	0.2791	C	T
rs2369463	chr12	77038743	C	T	-0.0218	0.0019	2.5e-29	0.1665	T	C
rs310796	chr12	77059446	T	G	0.0182	0.0015	3.4e-32	0.6791	G	T
rs12305743	chr12	77340214	T	A	-0.0109	0.0014	3.2e-14	0.5195	A	T
rs1913134	chr12	85362081	C	T	-0.0108	0.0019	5.6e-09	0.8147	T	C
rs10858975	chr12	90333652	T	A	-0.0177	0.0027	4.6e-11	0.08518	A	T
rs17714469	chr12	91101386	A	G	0.0187	0.0022	9.8e-17	0.1119	G	A
rs11107063	chr12	93526892	C	A	-0.0139	0.0018	6.3e-15	0.213	A	C
rs11107116	chr12	93584728	T	G	0.0522	0.0017	1.2e-202	0.2187	G	T
rs10859568	chr12	93737191	A	T	-0.0323	0.0014	8.6e-111	0.4348	T	A
rs4761530	chr12	93813518	G	A	-0.0177	0.0015	4.5e-34	0.4922	A	G
rs7961023	chr12	93932898	C	G	-0.0179	0.0015	1.3e-34	0.3995	G	C
rs270877	chr12	93974451	C	T	-0.014	0.0018	1.3e-15	0.8921	T	C
rs12313403	chr12	96303823	G	T	0.0094	0.0015	4.4e-10	0.3531	T	G
rs3858660	chr12	97186637	C	T	-0.0132	0.0023	5.7e-09	0.1134	T	C
rs10860202	chr12	97398912	T	C	-0.0108	0.0015	1.1e-13	0.5223	C	T
rs7966207	chr12	101835853	C	T	-0.0205	0.0022	2.1e-20	0.1179	T	C
rs11111094	chr12	101935028	A	C	-0.0105	0.0014	2.8e-13	0.4702	C	A
rs2888604	chr12	101950075	T	C	0.0234	0.0014	9.2e-59	0.4591	C	T
rs17032220	chr12	102013968	C	T	-0.0482	0.0035	3.7e-43	0.0442	T	C
rs73384885	chr12	102179502	G	T	-0.075894	0.00930658	3.4954e-16	0.30777	T	G
rs5742714	chr12	102396074	G	C	0.0287	0.0025	1.3e-30	0.1018	C	G
rs17032823	chr12	102555853	C	T	-0.0907	0.0072	3.8e-36	0.01163	T	C
rs855206	chr12	102564041	C	A	-0.0253	0.0024	8.5e-26	0.8944	A	C
rs833718	chr12	102677308	A	G	-0.0215	0.0014	1e-50	0.4653	G	A
rs12830406	chr12	102733454	G	A	-0.0259	0.002	9.2e-37	0.1517	A	G
rs879433	chr12	102739897	C	T	-0.0175	0.0025	2.7e-12	0.1095	T	C
rs1718302	chr12	102878908	A	G	-0.021	0.002	3.2e-26	0.8389	G	A
rs2164747	chr12	103951058	G	A	0.0239	0.0023	2.7e-25	0.1098	A	G
rs12305866	chr12	104448339	T	C	-0.024	0.0032	8.8e-14	0.05373	C	T
rs7954946	chr12	105070258	T	C	0.0098	0.0014	8.1e-12	0.5699	C	T
rs11609996	chr12	105710625	G	A	0.0111	0.0016	1.9e-11	0.2512	A	G
rs2302737	chr12	107710630	T	C	0.011	0.0015	8.4e-14	0.3983	C	T
rs1541597	chr12	109607113	T	G	0.0144	0.0018	9.6e-16	0.2122	G	T
rs3184504	chr12	111446804	C	T	0.0087	0.0014	1.3e-09	0.5126	T	C
rs1061657	chr12	114670331	C	T	0.0147	0.0017	2e-17	0.267	T	C
rs780886	chr12	115762355	A	G	0.0201	0.0024	1.7e-17	0.8954	G	A
rs4767473	chr12	116927701	A	G	0.0246	0.0021	2.1e-30	0.8642	G	A
rs11065286	chr12	120833931	C	T	-0.0157	0.0014	6.5e-28	0.5649	T	C
rs2596144	chr12	121859832	C	T	-0.0157	0.0021	7.9e-14	0.863	T	C
rs12812519	chr12	122049374	T	A	0.0178	0.0014	8e-35	0.4672	A	T
rs907482	chr12	122262476	G	A	0.0205	0.0015	1.2e-41	0.3344	A	G
rs907485	chr12	122281007	A	G	0.0225	0.003	5e-14	0.06262	G	A
rs6489159	chr12	122628259	A	G	0.0196	0.0016	5.3e-33	0.736	G	A
rs11830103	chr12	123338999	G	A	0.0356	0.0018	7.8e-89	0.2023	A	G
rs1027569	chr12	124158845	C	T	0.0096	0.0014	2.2e-11	0.541	T	C
rs1609725	chr12	124270130	C	T	-0.032	0.0029	6.5e-28	0.93458	T	C
rs904648	chr12	124290247	T	C	-0.0241	0.0019	1.4e-38	0.8111	C	T
rs1809889	chr12	124316680	C	T	-0.0304	0.0016	2.8e-78	0.7297	T	C
rs2229840	chr12	124341916	T	C	0.0303	0.002	6.5e-54	0.1538	C	T
rs7135151	chr12	124911509	G	T	0.0129	0.0018	1.2e-12	0.8044	T	G
rs12369173	chr12	125167151	C	T	-0.0088	0.0014	9e-10	0.4764	T	C
rs885389	chr12	131137217	G	A	-0.0121	0.0015	1.7e-15	0.6653	A	G
rs12423631	chr12	132122341	T	C	0.0185	0.002	6.6e-20	0.1514	C	T
rs7334222	chr13	20585419	A	G	-0.0134	0.0021	8.1e-11	0.7924	G	A
rs663599	chr13	20984315	G	T	0.0294	0.0023	1.1e-36	0.8832	T	G
rs4769541	chr13	27099194	A	G	0.0111	0.0019	5e-09	0.8232	G	A
rs2776959	chr13	29524485	T	C	-0.0153	0.0019	4.3e-15	0.8423	C	T
rs11618507	chr13	29598614	T	G	0.0178	0.0017	1.6e-24	0.2207	G	T
rs205004	chr13	32159042	A	T	0.0105	0.0015	8.3e-12	0.6471	T	A
rs17077179	chr13	32173517	A	C	0.0224	0.0024	5.8e-20	0.09588	C	A
rs9315339	chr13	35353628	A	G	0.0128	0.0021	4.4e-10	0.1455	G	A
rs9576006	chr13	36370595	A	G	-0.0121	0.0016	5.7e-14	0.2858	G	A
rs9576129	chr13	36881254	A	G	0.0122	0.0018	1.6e-11	0.2078	G	A
rs6563739	chr13	39665648	T	G	-0.0147	0.0015	6.7e-22	0.6663	G	T
rs2755237	chr13	40535292	C	A	-0.0209	0.0021	4e-24	0.1507	A	C
rs4941989	chr13	40725551	C	T	-0.0151	0.0016	1.1e-20	0.2964	T	C
rs12585865	chr13	42177571	C	T	-0.0137	0.0015	3.6e-20	0.3792	T	C
rs6561319	chr13	46537985	A	C	0.0157	0.0015	2.4e-25	0.6312	C	A
rs943280	chr13	48594886	C	G	0.0152	0.0016	1.2e-20	0.2693	G	C
rs1535468	chr13	49651694	A	G	-0.015	0.0018	1.6e-17	0.2252	G	A
rs9568298	chr13	49659556	G	A	0.0453	0.0027	2.7e-65	0.08986	A	G
rs2476391	chr13	50044368	C	T	-0.0347	0.003	3.8e-30	0.06116	T	C
rs2066603	chr13	50160107	T	G	-0.0182	0.0015	2e-34	0.5094	G	T
rs1924370	chr13	50354291	A	G	0.0195	0.0015	3.9e-41	0.4814	G	A
rs3118906	chr13	50532652	A	G	-0.0534	0.0016	4.5e-239	0.2779	G	A
rs11841965	chr13	50542353	A	T	-0.0189	0.003	4.4e-10	0.0608	T	A
rs1239689	chr13	50589143	A	C	0.0102	0.0015	7.1e-12	0.5357	C	A
rs797515	chr13	50653279	A	G	-0.0318	0.0016	2.2e-83	0.2727	G	A
rs11841145	chr13	50732194	G	A	0.036	0.0027	3e-39	0.08185	A	G
rs7990306	chr13	50809874	T	C	0.0103	0.0015	2.4e-12	0.5702	C	T
rs17593235	chr13	51068459	A	G	0.0098	0.0015	2.7e-11	0.446	G	A
rs8000549	chr13	58503689	A	G	-0.009	0.0015	5.5e-10	0.4542	G	A
rs12872224	chr13	72604805	A	G	-0.0169	0.0029	1e-08	0.06297	G	A
rs7336104	chr13	73048950	T	C	-0.0148	0.0019	1.3e-14	0.1756	C	T
rs6562757	chr13	73288556	A	G	0.0144	0.0016	9.8e-20	0.303	G	A
rs9543657	chr13	74475558	T	C	-0.0087	0.0014	2.2e-09	0.4475	C	T
rs9574556	chr13	80072231	C	G	0.0186	0.0018	2.7e-25	0.2063	G	C
rs390195	chr13	80244281	T	C	-0.0118	0.0016	7.5e-14	0.3117	C	T
rs6563199	chr13	80976314	C	T	-0.0132	0.0015	1e-17	0.6496	T	C
rs7337175	chr13	85362116	A	G	0.0124	0.0015	2.9e-16	0.377	G	A
rs9523266	chr13	91184084	G	A	-0.0149	0.0019	1.4e-14	0.1749	A	G
rs7319045	chr13	91372320	G	A	-0.0266	0.0015	4.7e-71	0.6194	A	G
rs7338171	chr13	96158079	A	G	-0.0177	0.0021	2.8e-17	0.8603	G	A
rs12875139	chr13	98865668	G	C	0.0169	0.0017	1.1e-22	0.2281	C	G
rs9300607	chr13	100571205	C	A	-0.0114	0.0015	8.3e-15	0.4917	A	C
rs8922	chr13	101053841	C	A	-0.0122	0.0018	3e-12	0.2195	A	C
rs933089	chr13	101447688	G	A	0.009	0.0015	1.3e-09	0.4336	A	G
rs9549699	chr13	113223949	A	T	0.0123	0.0017	9.4e-13	0.2311	T	A
rs7991266	chr13	114276680	G	A	-0.0261	0.0017	2.5e-52	0.2277	A	G
rs1760940	chr14	20470092	C	A	-0.0103	0.0017	4e-09	0.2335	A	C
rs8019890	chr14	21069908	A	C	0.0195	0.0016	5e-35	0.5379	C	A
rs2319627	chr14	21097030	C	T	-0.0176	0.0019	4.7e-20	0.1702	T	C
rs8016099	chr14	21230910	C	A	0.01	0.0017	2.1e-09	0.2451	A	C
rs9322989	chr14	21508619	A	G	-0.0201	0.0021	1.9e-21	0.139	G	A
rs2295124	chr14	23286389	G	A	0.0219	0.0017	2e-39	0.7297	A	G
rs3210043	chr14	23310668	A	C	0.0311	0.0021	7.5e-52	0.1577	C	A
rs11621360	chr14	23442198	C	T	0.0138	0.0015	2.7e-19	0.6605	T	C
rs11848279	chr14	24379075	G	A	0.0284	0.0017	1.8e-60	0.2199	A	G
rs10129213	chr14	24386996	G	T	-0.0369	0.0023	6.7e-57	0.8904	T	G
rs12891613	chr14	24434758	C	T	-0.0191	0.0022	5.4e-18	0.8719	T	C
rs2045180	chr14	30609296	A	G	0.0109	0.0015	1.3e-12	0.3283	G	A
rs1956002	chr14	32941543	C	A	0.0123	0.0019	4.8e-11	0.1775	A	C
rs17114075	chr14	35373054	T	C	-0.0159	0.0017	2.8e-20	0.2463	C	T
rs10131337	chr14	36675311	T	C	0.0212	0.0017	2.2e-34	0.2371	C	T
rs1168538	chr14	38374152	T	C	-0.0089	0.0015	1.8e-09	0.4126	C	T
rs17780143	chr14	50435050	A	G	0.0223	0.0032	2.8e-12	0.0532	G	A
rs904061	chr14	52037906	C	T	-0.0117	0.0017	5.6e-12	0.7573	T	C
rs17706401	chr14	53619745	G	A	-0.0112	0.0018	2.8e-10	0.2169	A	G
rs7160860	chr14	53872775	C	T	0.017	0.0021	1.5e-16	0.8497	T	C
rs811133	chr14	54180718	C	T	0.0141	0.0018	2.6e-14	0.8056	T	C
rs11620822	chr14	54735777	G	C	0.019	0.0018	2.1e-26	0.216	C	G
rs4898853	chr14	54768887	A	C	0.016	0.0016	4.2e-24	0.3067	C	A
rs927381	chr14	54798462	T	C	0.0191	0.0015	9.7e-39	0.5535	C	T
rs12435643	chr14	55666336	G	C	0.0148	0.0016	1.2e-19	0.2722	C	G
rs7142227	chr14	56193389	G	C	-0.0104	0.0014	5.7e-13	0.4679	C	G
rs1057737	chr14	57393970	G	A	-0.0138	0.0023	3.2e-09	0.8918	A	G
rs4898972	chr14	58873628	G	A	-0.0125	0.0019	1e-10	0.1782	A	G
rs4901902	chr14	59150362	C	A	-0.016	0.0022	4e-13	0.1299	A	C
rs1253014	chr14	59250796	A	G	-0.0127	0.0014	1.4e-18	0.4379	G	A
rs4144153	chr14	59584901	C	G	-0.027	0.0036	3e-14	0.95837	G	C
rs11625266	chr14	60232650	T	C	0.0092	0.0015	1.5e-09	0.3522	C	T
rs17097336	chr14	60332035	C	T	0.0274	0.0018	1.4e-51	0.2019	T	C
rs2145540	chr14	60333116	T	C	0.0236	0.0026	4.4e-20	0.09442	C	T
rs2351175	chr14	60600012	T	C	-0.0365	0.0026	9.3e-44	0.9185	C	T
rs11624328	chr14	63371095	A	C	-0.0198	0.0028	3.2e-12	0.07454	C	A
rs8011038	chr14	64540042	T	A	-0.0109	0.0016	4.9e-12	0.6868	A	T
rs2296316	chr14	65053528	C	T	-0.0247	0.0015	5.5e-64	0.458	T	C
rs11623920	chr14	65352596	C	A	0.0104	0.0015	2.5e-12	0.591	A	C
rs2588808	chr14	68193464	G	A	0.0241	0.002	1.9e-33	0.839	A	G
rs3784122	chr14	68448816	C	T	0.0175	0.0022	8e-16	0.1262	T	C
rs2525503	chr14	68561886	G	A	-0.0088	0.0014	1.2e-09	0.5263	A	G
rs11629144	chr14	68664876	T	G	-0.0131	0.0017	3e-14	0.2312	G	T
rs17107592	chr14	70000648	T	A	0.0203	0.0018	3.5e-28	0.1963	A	T
rs4903104	chr14	73268658	T	C	-0.0194	0.0019	7.8e-24	0.1732	C	T
rs862052	chr14	74514113	C	T	0.0294	0.0015	5.7e-83	0.6518	T	C
rs10140101	chr14	74571986	C	T	-0.0191	0.0014	5.3e-40	0.5542	T	C
rs12147363	chr14	75694964	A	G	0.0284	0.0036	2.8e-15	0.04139	G	A
rs11466414	chr14	75981507	A	G	-0.0288	0.0029	1.8e-23	0.06384	G	A
rs7144011	chr14	79474040	T	G	0.011	0.0017	2.8e-10	0.2136	G	T
rs935728	chr14	80491580	T	C	0.0124	0.0016	1.4e-15	0.3317	C	T
rs11159707	chr14	85529455	C	G	-0.0098	0.0016	2.2e-09	0.728	G	C
rs1956412	chr14	88685453	C	T	-0.0379	0.0057	3.7e-11	0.01742	T	C
rs2401787	chr14	89035679	C	T	-0.0135	0.0018	1.2e-13	0.2024	T	C
rs3742652	chr14	91669782	G	C	-0.0157	0.0024	3.5e-11	0.1048	C	G
rs1548817	chr14	91866524	T	C	0.0244	0.0019	1.2e-36	0.1762	C	T
rs2430339	chr14	91868960	G	A	-0.0152	0.0021	9e-13	0.8549	A	G
rs7154514	chr14	91960855	A	T	-0.0281	0.0014	1.3e-83	0.4462	T	A
rs1043542	chr14	92940717	G	A	-0.0163	0.0016	6.7e-26	0.6149	A	G
rs7158343	chr14	94316816	G	C	0.0115	0.0017	1.1e-11	0.2423	C	G
rs4905179	chr14	94329155	G	A	0.0185	0.0018	3.2e-25	0.2076	A	G
rs7151526	chr14	94397299	A	C	0.0535	0.0036	2e-49	0.05092	C	A
rs1057035	chr14	95087805	C	T	0.0105	0.0015	4.8e-12	0.3639	T	C
rs17092197	chr14	95432270	G	A	-0.0115	0.0018	1.9e-10	0.2508	A	G
rs2273608	chr14	100732404	T	C	0.0247	0.0025	1.8e-22	0.09618	C	T
rs1190545	chr14	102437842	C	G	0.0226	0.0016	2.5e-43	0.7344	G	C
rs10459573	chr14	103459120	C	A	-0.0264	0.0015	4.2e-70	0.366	A	C
rs17617994	chr14	103492952	T	G	0.0309	0.0021	4.6e-47	0.1384	G	T
rs1130214	chr14	104793397	A	C	0.0142	0.0016	1.5e-18	0.271	C	A
rs10151805	chr14	105508444	C	T	0.0133	0.0017	2.7e-15	0.248	T	C
rs17117836	chr15	23930624	T	C	-0.0146	0.0024	9.8e-10	0.1027	C	T
rs17639328	chr15	38049048	T	C	0.0162	0.0024	6.6e-12	0.1161	C	T
rs16966213	chr15	38069246	T	C	0.0227	0.0029	6.8e-15	0.07226	C	T
rs16966465	chr15	38221529	G	C	0.016	0.0018	4.5e-19	0.2121	C	G
rs6495962	chr15	38359831	T	C	-0.016	0.0015	4.7e-26	0.6611	C	T
rs8023845	chr15	40121915	T	G	0.0118	0.0018	8.9e-11	0.2047	G	T
rs7182660	chr15	41046071	T	C	-0.0179	0.0024	1.9e-13	0.09507	C	T
rs7168307	chr15	41328336	G	A	-0.0203	0.0016	2.5e-35	0.2728	A	G
rs4924564	chr15	41617595	T	A	-0.0156	0.0015	3.4e-25	0.6517	A	T
rs10454692	chr15	42564857	C	T	-0.015	0.002	1.3e-13	0.1535	T	C
rs3803341	chr15	42945005	C	T	-0.0146	0.0022	3.5e-11	0.8828	T	C
rs1484194	chr15	46373992	G	A	0.0137	0.0019	4.8e-13	0.1934	A	G
rs8025708	chr15	47623107	C	T	0.0089	0.0015	4.7e-09	0.3517	T	C
rs12592845	chr15	48392761	T	C	-0.0346	0.0026	4.3e-41	0.09343	C	T
rs1018148	chr15	48610929	G	A	0.032	0.0024	2.1e-39	0.90242	A	G
rs11631351	chr15	50462582	G	C	0.0137	0.0019	1.3e-12	0.1676	C	G
rs12438343	chr15	50952220	C	G	0.0174	0.0014	1.2e-33	0.4626	G	C
rs16964211	chr15	51238298	A	G	-0.053	0.0034	2.4e-53	0.0494	G	A
rs767199	chr15	51248190	A	G	0.0164	0.0014	7e-30	0.5017	G	A
rs1004982	chr15	51321614	C	T	-0.0161	0.0015	3.3e-27	0.382	T	C
rs17704365	chr15	51350292	G	A	-0.0326	0.0035	3.3e-21	0.0487	A	G
rs8182039	chr15	53693253	C	A	-0.0102	0.0016	1.3e-10	0.294	A	C
rs6493824	chr15	55870411	C	T	0.0125	0.0018	1.1e-11	0.8017	T	C
rs3743266	chr15	60489314	C	T	-0.0139	0.0015	6.9e-20	0.3265	T	C
rs17270446	chr15	60781603	G	C	0.0107	0.0015	1.6e-12	0.3725	C	G
rs813017	chr15	61117896	G	C	-0.0175	0.0015	1.2e-30	0.3331	C	G
rs7178540	chr15	62087933	A	G	-0.0201	0.0014	1.5e-43	0.4338	G	A
rs1463805	chr15	62759392	A	T	0.0111	0.0016	2.4e-12	0.6974	T	A
rs11635675	chr15	63501039	G	T	0.0138	0.0015	1.9e-19	0.3535	T	G
rs6494509	chr15	65015125	C	T	-0.0088	0.0014	1.3e-09	0.4732	T	C
rs892650	chr15	65439718	T	C	0.0177	0.0018	9.3e-22	0.1869	C	T
rs4483802	chr15	66387481	C	G	-0.0165	0.0027	1.9e-09	0.07548	G	C
rs1866750	chr15	66615205	C	T	-0.0136	0.0018	8.7e-15	0.2245	T	C
rs11853853	chr15	66730132	G	T	-0.0199	0.0014	9.3e-43	0.54	T	G
rs11856909	chr15	67085695	G	A	0.0139	0.0015	4.1e-21	0.6008	A	G
rs12915039	chr15	67142010	C	A	-0.0148	0.0017	1.2e-17	0.2416	A	C
rs7183244	chr15	67168973	C	T	-0.0172	0.0015	2.1e-31	0.6	T	C
rs6494638	chr15	67237697	A	T	0.0087	0.0014	1.7e-09	0.5125	T	A
rs16953685	chr15	69741749	C	A	-0.0445	0.0024	1.2e-77	0.09577	A	C
rs88505	chr15	69835250	A	G	0.0116	0.002	6.1e-09	0.841	G	A
rs12917463	chr15	70482751	C	T	-0.0138	0.0018	6.4e-14	0.2023	T	C
rs4777409	chr15	71544085	T	G	0.0086	0.0015	3.7e-09	0.5079	G	T
rs17737742	chr15	71730416	T	C	0.0105	0.0018	9.4e-09	0.2004	C	T
rs11633167	chr15	71886837	A	C	-0.0194	0.0016	3.4e-33	0.7339	C	A
rs9672916	chr15	72308086	T	C	0.0572	0.0048	3.5e-32	0.02572	C	T
rs4461027	chr15	73919207	T	C	0.0299	0.0015	1.7e-91	0.5833	C	T
rs5742915	chr15	74044292	C	T	0.0326	0.0015	1.1e-110	0.4483	T	C
rs12443108	chr15	74603486	G	A	-0.0338	0.0039	9.4e-18	0.03859	A	G
rs11636199	chr15	75532996	G	A	0.0248	0.0017	2e-50	0.2482	A	G
rs4886755	chr15	76005791	G	A	0.0086	0.0014	1.6e-09	0.5048	A	G
rs12900395	chr15	77018004	G	C	-0.0152	0.0015	3.8e-25	0.4926	C	G
rs9806416	chr15	77035230	C	T	-0.0163	0.0015	3.4e-26	0.6675	T	C
rs17472200	chr15	77491470	G	C	-0.0181	0.0016	1.3e-29	0.2817	C	G
rs931963	chr15	81184360	T	C	-0.0165	0.0022	7.2e-14	0.1283	C	T
rs4778639	chr15	81308110	G	T	0.0238	0.0025	7.4e-21	0.07823	T	G
rs12899457	chr15	81527247	G	T	0.0193	0.0016	1.8e-32	0.7026	T	G
rs17259508	chr15	81954920	C	A	-0.0181	0.002	2.7e-20	0.1683	A	C
rs2174110	chr15	82128402	G	A	0.0114	0.0018	3.2e-10	0.7978	A	G
rs17158688	chr15	83697004	A	G	0.0174	0.0022	1.2e-15	0.1181	G	A
rs1019668	chr15	83712457	T	G	0.016	0.0014	5.8e-29	0.5137	G	T
rs79211113	chr15	83908311	T	C	-0.065502	0.0117319	2.3608e-08	0.18122	C	T
rs1526080	chr15	83921168	A	G	0.0496	0.0014	1.3e-262	0.5226	G	A
rs2011013	chr15	83957014	T	A	-0.0287	0.0016	2.2e-69	0.2826	A	T
rs1567085	chr15	84089946	G	A	-0.0322	0.0036	4e-19	0.9368	A	G
rs3748374	chr15	84641012	G	A	-0.0247	0.002	4.5e-36	0.1629	A	G
rs8039472	chr15	84818413	G	A	-0.0153	0.0014	1.5e-26	0.516	A	G
rs17611075	chr15	85025708	T	A	-0.0265	0.0023	2.4e-30	0.1105	A	T
rs10520597	chr15	85627024	A	G	-0.0198	0.0015	5.4e-38	0.323	G	A
rs4534816	chr15	88722088	A	G	0.0163	0.002	7.2e-16	0.1514	G	A
rs11633371	chr15	88813601	T	G	0.0321	0.0014	1.1e-108	0.4828	G	T
rs8033375	chr15	88818628	C	T	0.0267	0.0021	1.3e-35	0.1396	T	C
rs2280470	chr15	88852395	G	A	-0.0405	0.0015	6.3e-154	0.6684	A	G
rs9630453	chr15	88860691	G	A	-0.0386	0.0026	7.8e-49	0.07875	A	G
rs3817428	chr15	88872016	G	C	-0.0389	0.0016	7.8e-125	0.2703	C	G
rs4534818	chr15	88958997	G	A	-0.0143	0.0016	2e-18	0.3275	A	G
rs4473163	chr15	89569250	C	T	-0.0145	0.0015	1.5e-21	0.6078	T	C
rs6496620	chr15	90074307	T	C	-0.013	0.0016	3.6e-15	0.2553	C	T
rs12708583	chr15	90507039	C	T	-0.0134	0.0014	2.2e-20	0.541	T	C
rs11073953	chr15	90810354	T	C	0.0117	0.0015	4e-14	0.3418	C	T
rs4702	chr15	90883330	A	G	-0.011	0.0015	1e-13	0.5531	G	A
rs2304655	chr15	92891995	T	C	-0.0103	0.0015	4.1e-12	0.5645	C	T
rs4777828	chr15	93297329	G	A	0.0118	0.0015	1.9e-15	0.6132	A	G
rs10162848	chr15	93482950	A	G	-0.0118	0.0016	7.8e-14	0.3047	G	A
rs7181724	chr15	94008378	G	A	0.0185	0.0015	1.3e-34	0.4331	A	G
rs12912439	chr15	95285476	T	C	0.0107	0.0016	5.3e-11	0.2899	C	T
rs11634106	chr15	98561597	T	C	0.0178	0.0021	4.6e-17	0.158	C	T
rs4966005	chr15	98632968	C	G	-0.0233	0.0033	1.2e-12	0.05221	G	C
rs28633725	chr15	98635669	G	A	-0.100495	0.0162642	6.45464e-10	0.09727	A	G
rs2871865	chr15	98651667	G	C	-0.0585	0.0023	4.6e-144	0.1138	C	G
rs8028620	chr15	98659646	T	C	-0.0183	0.0014	1.2e-36	0.5156	C	T
rs2684777	chr15	98853465	C	T	0.0196	0.0018	3.3e-28	0.2192	T	C
rs8034284	chr15	98953019	T	C	0.014	0.0014	4.6e-22	0.4725	C	T
rs2573652	chr15	99974409	C	T	0.022	0.0015	9.3e-47	0.6617	T	C
rs1351438	chr15	100061264	C	A	-0.0155	0.0018	1.5e-17	0.8002	A	C
rs4246302	chr15	100147762	G	A	0.0239	0.0016	1.1e-51	0.3051	A	G
rs4482264	chr15	100157763	C	T	0.0218	0.0015	2.9e-47	0.3554	T	C
rs6598308	chr15	100160315	T	C	-0.0138	0.0016	4.7e-18	0.6552	C	T
rs4567683	chr15	100238632	G	A	-0.035	0.0016	2.3e-104	0.7311	A	G
rs7496668	chr15	100281371	A	G	-0.0228	0.0016	4.7e-48	0.3402	G	A
rs11247253	chr15	101022588	A	G	0.0212	0.0021	1.7e-24	0.8523	G	A
rs17744500	chr15	101059041	C	T	0.0148	0.0014	7.5e-25	0.5261	T	C
rs7170986	chr15	101092662	A	G	-0.0158	0.0017	1.8e-20	0.2312	G	A
rs897486	chr15	101112625	T	C	-0.0101	0.0015	3.7e-11	0.408	C	T
rs8042424	chr15	101222334	T	C	-0.0252	0.0017	7e-49	0.2494	C	T
rs11858490	chr15	101467238	G	T	0.0179	0.0019	9.9e-21	0.8376	T	G
rs568165	chr15	101649888	C	T	-0.0088	0.0014	1.3e-09	0.4547	T	C
rs2301522	chr16	309953	G	A	-0.0125	0.0015	7.1e-16	0.6563	A	G
rs7204088	chr16	611142	C	T	0.0225	0.0017	4.5e-38	0.2133	T	C
rs213658	chr16	1064258	G	A	-0.0146	0.0017	2.9e-17	0.2285	A	G
rs13336428	chr16	1482462	A	G	-0.011	0.0015	1.7e-13	0.409	G	A
rs26849	chr16	2213145	G	A	0.0221	0.0014	2e-52	0.5243	A	G
rs2238464	chr16	2282576	T	C	0.0151	0.0015	1e-22	0.3188	C	T
rs4786283	chr16	2444163	T	C	0.0177	0.0015	1e-30	0.6667	C	T
rs2238385	chr16	3149117	T	C	0.011	0.0015	8.9e-14	0.4145	C	T
rs2531992	chr16	3971733	G	A	0.0262	0.002	3e-38	0.8496	A	G
rs3848370	chr16	4310313	C	G	0.018	0.0018	7.5e-24	0.2243	G	C
rs2343573	chr16	6123185	G	C	0.0086	0.0014	2.7e-09	0.4857	C	G
rs166232	chr16	8941527	C	T	-0.015	0.0016	7.3e-20	0.713	T	C
rs12925781	chr16	9123057	T	C	0.0127	0.0016	1e-14	0.2775	C	T
rs2719655	chr16	10662390	T	C	0.0113	0.0015	1.1e-13	0.3514	C	T
rs8051349	chr16	12011666	A	T	0.0095	0.0015	1.4e-10	0.6038	T	A
rs12598821	chr16	12800999	C	T	-0.0132	0.0019	7.8e-12	0.1703	T	C
rs246185	chr16	14301575	C	T	0.0274	0.0016	1.8e-66	0.323	T	C
rs17201300	chr16	14571487	G	A	-0.0104	0.0017	1.2e-09	0.2439	A	G
rs1741	chr16	15036494	C	G	-0.0162	0.0016	3.1e-24	0.2978	G	C
rs1051547	chr16	19268058	C	T	-0.0114	0.0015	7.4e-15	0.5594	T	C
rs3829539	chr16	19711044	C	T	0.0121	0.0019	3.5e-10	0.1773	T	C
rs11643502	chr16	20701216	A	G	-0.0186	0.0021	2.1e-18	0.1355	G	A
rs7195386	chr16	24567137	C	T	0.0107	0.0014	1e-13	0.4986	T	C
rs2343354	chr16	24717462	C	T	0.0142	0.0015	4e-20	0.3168	T	C
rs2880663	chr16	24766425	T	G	-0.0186	0.0021	1.5e-18	0.139	G	T
rs4787489	chr16	29984559	A	G	0.0189	0.0014	4.1e-39	0.4516	G	A
rs16947741	chr16	49637307	T	C	0.0312	0.0047	3.3e-11	0.03011	C	T
rs933561	chr16	49840765	G	A	-0.0136	0.0015	3e-19	0.3382	A	G
rs3859117	chr16	50218291	G	A	-0.0113	0.0017	4.6e-11	0.7623	A	G
rs10521261	chr16	52266343	G	T	-0.0117	0.0018	1.5e-10	0.2042	T	G
rs2388011	chr16	53179507	G	A	-0.0109	0.0014	5.1e-14	0.4481	A	G
rs8058684	chr16	53481206	A	G	0.0265	0.0016	6.4e-64	0.3113	G	A
rs8059888	chr16	55039249	T	C	0.0106	0.0014	2.8e-13	0.4831	C	T
rs3868143	chr16	67294550	C	T	-0.0349	0.0027	4.7e-37	0.07589	T	C
rs8061122	chr16	68350033	G	A	-0.0303	0.0035	2.8e-18	0.04859	A	G
rs2288039	chr16	69154209	G	A	-0.0164	0.0016	9.5e-25	0.2829	A	G
rs3790086	chr16	69853804	G	C	-0.024	0.0014	7.8e-62	0.4429	C	G
rs3931036	chr16	70514394	A	G	-0.0299	0.0029	2.6e-25	0.93428	G	A
rs4788811	chr16	71591306	G	A	-0.0204	0.0021	9.1e-22	0.1297	A	G
rs979790	chr16	71632082	T	A	-0.0145	0.0019	4.3e-14	0.8293	A	T
rs8044476	chr16	72766668	G	A	-0.0129	0.002	2.7e-10	0.1373	A	G
rs9940321	chr16	73039909	A	G	0.0096	0.0016	9.2e-10	0.3361	G	A
rs739414	chr16	73064057	T	C	-0.0126	0.0017	1.6e-13	0.7296	C	T
rs16972457	chr16	73750823	A	G	-0.0159	0.0015	7.9e-25	0.3499	G	A
rs328392	chr16	73803391	T	C	-0.0146	0.0016	2e-20	0.3123	C	T
rs12930876	chr16	75170427	T	C	-0.0167	0.0016	1.2e-25	0.2955	C	T
rs3863445	chr16	75337846	G	C	0.0142	0.0015	6.9e-22	0.5827	C	G
rs2707612	chr16	78015063	G	A	-0.0134	0.0015	3.7e-19	0.3719	A	G
rs1424113	chr16	79138168	G	A	0.0148	0.0021	3.4e-12	0.1411	A	G
rs4545829	chr16	79971745	A	G	0.0085	0.0015	8e-09	0.5658	G	A
rs9931605	chr16	81545886	C	T	0.0206	0.0019	2.6e-26	0.18	T	C
rs2966116	chr16	81565762	A	G	0.0166	0.002	6.3e-17	0.8463	G	A
rs753108	chr16	81695376	G	A	-0.0111	0.0017	4.7e-11	0.2618	A	G
rs7192444	chr16	82146733	C	G	-0.0221	0.0017	4.1e-37	0.7801	G	C
rs4782865	chr16	83949466	T	C	-0.0111	0.0015	8.7e-14	0.6036	C	T
rs7498516	chr16	84740846	T	C	0.0203	0.0018	4e-30	0.2161	C	T
rs7204018	chr16	84828128	G	A	-0.0144	0.0018	1.8e-15	0.7585	A	G
rs2646126	chr16	84854991	G	C	0.0125	0.0016	7.2e-15	0.699	C	G
rs4303473	chr16	84867869	C	G	0.0156	0.0015	1.4e-24	0.3897	G	C
rs7197027	chr16	85159349	C	T	0.01	0.0015	1.5e-11	0.5259	T	C
rs12923579	chr16	86342608	G	A	0.0191	0.0029	6.7e-11	0.07133	A	G
rs8054549	chr16	86383628	A	C	-0.0134	0.0015	9.2e-20	0.4388	C	A
rs1169644	chr16	86503426	A	G	-0.0105	0.0018	3e-09	0.7692	G	A
rs7188801	chr16	86674163	A	G	-0.017	0.002	1.6e-17	0.165	G	A
rs4843568	chr16	87214279	A	G	0.0225	0.0033	9e-12	0.9482	G	A
rs17770752	chr16	87267354	C	T	0.0151	0.0018	2.7e-16	0.1986	T	C
rs11648894	chr16	88699951	T	C	-0.0171	0.0016	8.1e-27	0.324	C	T
rs2968482	chr16	88778025	C	T	-0.0187	0.0016	6.7e-31	0.3071	T	C
rs57364768	chr16	89676592	A	G	0.0568185	0.0100971	1.83148e-08	0.31238	G	A
rs2740351	chr17	740186	A	G	-0.0103	0.0014	7.5e-13	0.5479	G	A
rs7221974	chr17	1727290	G	A	-0.0176	0.0016	1.5e-26	0.2697	A	G
rs12450371	chr17	1764380	T	C	0.0165	0.0015	6.3e-27	0.3485	C	T
rs216175	chr17	2264396	C	A	-0.0125	0.0019	8.6e-11	0.1687	A	C
rs17822257	chr17	2982797	A	C	-0.0134	0.0017	4.7e-15	0.2388	C	A
rs7225453	chr17	4057326	C	T	0.0127	0.0018	4.6e-12	0.1897	T	C
rs2727062	chr17	4079054	T	A	0.0191	0.0029	6.7e-11	0.93487	A	T
rs2240276	chr17	6643601	G	C	-0.0097	0.0015	6e-11	0.621	C	G
rs9217	chr17	7459769	C	T	0.0321	0.0015	1.3e-102	0.3562	T	C
rs1642763	chr17	7654101	G	A	-0.0208	0.0017	1.1e-34	0.7875	A	G
rs4130668	chr17	7836346	C	T	0.0137	0.0018	9.8e-15	0.7819	T	C
rs8067165	chr17	8128618	G	C	0.0203	0.0015	1.3e-40	0.6048	C	G
rs17743570	chr17	9246928	T	G	0.0129	0.0019	4.1e-11	0.1672	G	T
rs7211610	chr17	9255771	G	T	-0.0103	0.0016	5.1e-11	0.3051	T	G
rs4646365	chr17	17564469	T	C	-0.0106	0.0014	1.7e-13	0.519	C	T
rs7213608	chr17	21375977	T	C	0.0281	0.0016	2.1e-72	0.6786	C	T
rs7207347	chr17	27256626	T	C	0.011	0.0014	1.9e-14	0.4578	C	T
rs1023682	chr17	28787582	A	G	0.0183	0.0022	6.8e-17	0.8772	G	A
rs3110496	chr17	29590753	G	A	0.0193	0.0015	5.7e-36	0.677	A	G
rs4350617	chr17	30096070	A	G	0.0118	0.0014	2.4e-16	0.4599	G	A
rs8081187	chr17	30689342	A	G	-0.0562	0.0026	1.4e-100	0.08536	G	A
rs3760318	chr17	30920697	A	G	-0.0447	0.0015	5.8e-200	0.3813	G	A
rs178886	chr17	31467452	G	A	-0.0185	0.0015	5.6e-33	0.6722	A	G
rs8070554	chr17	31889849	T	A	-0.0238	0.0019	5.8e-37	0.8198	A	T
rs584828	chr17	40442978	T	C	-0.0253	0.0015	2e-66	0.3894	C	T
rs16970956	chr17	44731123	A	G	0.022	0.0018	3.8e-33	0.1843	G	A
rs17683692	chr17	44807589	T	A	0.0151	0.0019	2.3e-15	0.1748	A	T
rs916661	chr17	45081534	A	G	0.019	0.0017	2.5e-28	0.2236	G	A
rs16939864	chr17	45109189	A	G	0.021	0.0034	8.1e-10	0.04859	G	A
rs4986172	chr17	45138914	T	C	-0.0306	0.0015	3e-89	0.3457	C	T
rs17698176	chr17	46742229	G	T	0.0173	0.0018	2.2e-21	0.2105	T	G
rs199500	chr17	46786047	C	T	0.0116	0.0017	6.2e-12	0.7568	T	C
rs4968280	chr17	46852997	C	T	0.0186	0.002	7.2e-20	0.1446	T	C
rs7206971	chr17	47347749	A	G	-0.0164	0.0014	2.7e-30	0.4882	G	A
rs11654010	chr17	47883499	C	T	0.0111	0.0015	2.8e-13	0.342	T	C
rs11650043	chr17	47950486	A	G	0.0254	0.0028	3.1e-19	0.06805	G	A
rs8073371	chr17	48018910	T	C	-0.0216	0.0017	1.3e-35	0.2092	C	T
rs6504389	chr17	48566002	G	C	-0.0122	0.002	1e-09	0.843	C	G
rs2280351	chr17	48752937	A	G	-0.0123	0.0016	1.4e-14	0.6637	G	A
rs563916	chr17	48853545	A	G	-0.019	0.0023	2.4e-16	0.1067	G	A
rs3848460	chr17	48969752	G	A	0.0285	0.0014	7.6e-87	0.4355	A	G
rs2969	chr17	49050885	T	C	-0.0233	0.0017	1.6e-44	0.2577	C	T
rs12940887	chr17	49325445	T	C	-0.0207	0.0015	5.1e-44	0.3778	C	T
rs2584681	chr17	49452384	G	A	-0.0202	0.0017	9.9e-32	0.7478	A	G
rs4605213	chr17	51167386	C	G	0.0131	0.0015	4e-18	0.3379	G	C
rs2787508	chr17	55110135	T	C	0.0112	0.0017	3.6e-11	0.3003	C	T
rs741128	chr17	56181752	A	G	-0.0127	0.0014	1.6e-18	0.5051	G	A
rs1372854	chr17	56497770	G	A	0.0102	0.0017	1.5e-09	0.7582	A	G
rs12450049	chr17	56518865	A	G	-0.0098	0.0015	1.8e-10	0.6546	G	A
rs4794649	chr17	56617719	A	T	0.0352	0.0032	9.6e-28	0.94925	T	A
rs227723	chr17	56701543	T	C	0.0262	0.0016	4e-63	0.3072	C	T
rs1467246	chr17	56767756	T	C	-0.0284	0.0014	3.6e-87	0.489	C	T
rs740605	chr17	58527450	T	C	0.0119	0.0015	3e-15	0.4	C	T
rs757608	chr17	61419916	G	A	-0.0471	0.0015	2.9e-209	0.6623	A	G
rs1069	chr17	61497237	T	C	0.04	0.0051	3.3e-15	0.02532	C	T
rs2079796	chr17	61531365	C	G	0.0213	0.0015	3.5e-45	0.3792	G	C
rs4968575	chr17	61589755	G	C	-0.0144	0.0015	6e-23	0.5659	C	G
rs1476812	chr17	62842115	T	C	-0.0098	0.0015	1.5e-10	0.3707	C	T
rs12940055	chr17	63644782	T	C	-0.0343	0.0023	9.6e-51	0.1135	C	T
rs10221279	chr17	63728778	A	G	0.0491179	0.00865755	1.39976e-08	0.53555	A	G
rs9893518	chr17	63929637	C	T	0.0486	0.0016	1.6e-191	0.262	T	C
rs2532111	chr17	63940061	G	A	0.0432	0.0016	2.5e-165	0.6503	A	G
rs4968679	chr17	63969381	T	C	-0.0151	0.0014	2.4e-25	0.4918	C	T
rs2240308	chr17	65558473	A	G	0.0185	0.0015	1e-35	0.5254	G	A
rs757558	chr17	65565474	T	G	-0.0353	0.0021	1.7e-62	0.1575	G	T
rs1833348	chr17	65778501	G	T	-0.01	0.0014	4.4e-12	0.4371	T	G
rs4577128	chr17	66312355	C	T	0.017	0.0014	1.2e-31	0.5764	T	C
rs4790981	chr17	67925718	G	A	0.0177	0.0018	1.7e-22	0.2041	A	G
rs965991	chr17	68288494	G	T	0.0185	0.0015	2e-34	0.3664	T	G
rs817543	chr17	69419136	G	A	-0.0112	0.0014	8e-15	0.5029	A	G
rs2715819	chr17	69497553	T	C	0.0136	0.0015	5.4e-20	0.4188	C	T
rs2072075	chr17	69543430	T	C	0.0126	0.002	5e-10	0.1474	C	T
rs972846	chr17	69873361	G	A	0.0192	0.002	8.3e-22	0.1482	A	G
rs11867479	chr17	70094066	T	C	0.0244	0.0015	3e-58	0.3669	C	T
rs4968799	chr17	70162690	T	A	-0.0277	0.0023	2.5e-33	0.1098	A	T
rs236595	chr17	70211687	G	A	-0.0109	0.0014	5.3e-14	0.4747	A	G
rs1486296	chr17	70687267	T	C	-0.0111	0.0015	7.6e-13	0.3228	C	T
rs7214479	chr17	71194808	C	T	0.0096	0.0014	3e-11	0.5628	T	C
rs7223448	chr17	71315812	C	T	0.0107	0.0015	1.4e-12	0.6561	T	C
rs7211642	chr17	71936771	C	T	0.0201	0.0016	7.9e-35	0.2804	T	C
rs9890869	chr17	71987396	C	T	-0.0103	0.0014	7.9e-13	0.465	T	C
rs17767918	chr17	72047202	G	C	0.0127	0.0016	1.4e-15	0.2964	C	G
rs9901434	chr17	75392689	G	A	0.023	0.0019	1.3e-32	0.8274	A	G
rs417734	chr17	77391922	A	G	0.0129	0.0017	1.9e-13	0.2157	G	A
rs9909570	chr17	78162446	A	G	0.0116	0.0015	3e-15	0.563	G	A
rs7219215	chr17	78399088	C	T	-0.0177	0.002	4.8e-18	0.1461	T	C
rs1044486	chr17	78796097	A	G	-0.0149	0.0014	6.1e-25	0.5382	G	A
rs8066695	chr17	78917761	C	T	-0.0097	0.0015	2.8e-11	0.4635	T	C
rs4076427	chr17	81113737	C	G	-0.016	0.0015	7.8e-26	0.3962	G	C
rs11150785	chr17	81423878	T	C	0.0144	0.0018	5.5e-15	0.2167	C	T
rs9944398	chr17	82219563	G	A	-0.0135	0.0015	1.1e-18	0.6766	A	G
rs12453001	chr17	82577265	A	T	-0.0141	0.0015	4.5e-21	0.6297	T	A
rs2279064	chr17	82920387	C	G	0.0124	0.0021	5.5e-09	0.1278	G	C
rs1078334	chr17	82926371	C	T	0.0088	0.0015	7.2e-09	0.3479	T	C
rs4798177	chr18	429054	A	T	0.0104	0.0016	9.5e-11	0.304	T	A
rs1561819	chr18	2712631	G	A	-0.0146	0.0014	6.6e-24	0.508	A	G
rs12607903	chr18	3817134	T	C	-0.0105	0.0016	1.1e-10	0.7141	C	T
rs10163862	chr18	5184450	T	C	-0.011	0.0015	7.3e-14	0.4423	C	T
rs3974759	chr18	11979295	A	T	-0.0119	0.0016	3.7e-13	0.2779	T	A
rs1786263	chr18	13116433	T	G	-0.015	0.0015	3.5e-24	0.6111	G	T
rs1785113	chr18	13483637	A	G	0.01	0.0016	1.5e-10	0.659	G	A
rs4369779	chr18	23155444	C	T	0.0667	0.0018	9.59999999999999e-310	0.794	T	C
rs61480056	chr18	23183095	G	C	-0.0866101	0.0125401	4.96227e-12	0.15835	C	G
rs4519409	chr18	25142113	C	A	0.0134	0.0015	1e-18	0.65	A	C
rs4133168	chr18	25232544	T	C	-0.0154	0.0016	9.4e-23	0.3047	C	T
rs2000669	chr18	32168500	T	C	0.0137	0.0019	2.9e-13	0.18	C	T
rs9949076	chr18	35444402	T	C	0.0161	0.0016	6.2e-24	0.3218	C	T
rs12457358	chr18	43879458	A	G	0.012	0.0015	4e-15	0.3359	G	A
rs675806	chr18	44173963	C	A	0.0127	0.0015	1.5e-16	0.6513	A	C
rs1512235	chr18	47255198	G	A	0.0134	0.0015	8e-20	0.5807	A	G
rs12607339	chr18	48360957	A	T	0.016	0.0015	6.7e-25	0.3296	T	A
rs10775487	chr18	48720772	G	T	-0.011	0.0016	3.4e-12	0.3152	T	G
rs16949934	chr18	48750855	A	G	-0.0263	0.0026	1.7e-23	0.08185	G	A
rs3764482	chr18	48942576	A	G	-0.0177	0.0019	1.5e-20	0.1906	G	A
rs3736242	chr18	48948376	T	C	-0.0154	0.0018	3.2e-18	0.2289	C	T
rs13380996	chr18	49058817	C	T	-0.0525	0.0033	2e-56	0.05309	T	C
rs11664336	chr18	49078481	T	A	0.0361	0.0015	8.6e-134	0.4339	A	T
rs7505245	chr18	49413246	C	T	0.0227	0.0027	1.4e-16	0.92142	T	C
rs10853631	chr18	53410410	A	G	0.0103	0.0014	1.2e-12	0.5556	G	A
rs11152363	chr18	55389957	A	G	0.0155	0.0019	2.2e-16	0.1909	G	A
rs17596995	chr18	55499363	A	G	-0.017	0.0018	6.7e-21	0.2015	G	A
rs9636077	chr18	56337695	C	A	0.009	0.0014	5.2e-10	0.4701	A	C
rs11662962	chr18	59385611	A	G	0.0148	0.0021	6.7e-12	0.1337	G	A
rs6567160	chr18	60161902	C	T	0.0297	0.0017	6.5e-67	0.2298	T	C
rs8097893	chr18	77271099	G	A	-0.0356	0.0035	9.2e-24	0.04478	A	G
rs9952407	chr18	79088599	C	T	-0.0112	0.0018	1.2e-09	0.1916	T	C
rs8090312	chr18	79465154	G	A	-0.0218	0.0016	1.2e-42	0.3082	A	G
rs4806862	chr19	2523783	T	G	0.0129	0.0016	2.3e-16	0.3289	G	T
rs4807470	chr19	3443472	T	A	0.0245	0.0015	3.4e-57	0.3603	A	T
rs12462204	chr19	4772751	C	G	-0.0162	0.0022	5.6e-14	0.1317	G	C
rs2123731	chr19	4929461	G	A	-0.0258	0.0016	2.7e-55	0.2696	A	G
rs891088	chr19	7184751	G	A	0.0247	0.0016	6.7e-51	0.2632	A	G
rs881759	chr19	7228335	T	C	-0.0229	0.0018	6e-36	0.1745	C	T
rs12977189	chr19	7995818	T	C	0.0203	0.0031	3.6e-11	0.07215	C	T
rs4804311	chr19	8550705	G	A	-0.0301	0.0027	3.7e-29	0.08706	A	G
rs4072910	chr19	8579147	C	G	-0.0293	0.0015	2.6e-83	0.4621	G	C
rs1473280	chr19	8678830	C	G	-0.0142	0.002	2.5e-12	0.1591	G	C
rs10418707	chr19	10145541	A	G	0.0383	0.0029	1.2e-38	0.06665	G	A
rs6511689	chr19	10210413	C	T	-0.0172	0.0016	3.4e-27	0.3082	T	C
rs17000211	chr19	10258410	T	C	-0.0209	0.0018	2.1e-30	0.2038	C	T
rs1560711	chr19	10631611	T	C	-0.0263	0.0017	1.9e-51	0.7847	C	T
rs17678136	chr19	11001765	C	T	-0.0299	0.003	1.2e-23	0.06542	T	C
rs7188	chr19	11164463	C	A	-0.021	0.0016	3.9e-40	0.3321	A	C
rs1561408	chr19	12064568	T	C	0.0377	0.0027	2.9e-43	0.07367	C	T
rs11666603	chr19	12386120	C	T	0.0162	0.0018	7.7e-20	0.7634	T	C
rs1042164	chr19	13153584	T	C	-0.0183	0.0019	1.6e-21	0.1825	C	T
rs12463215	chr19	14163821	C	G	0.0161	0.0023	3.5e-12	0.1233	G	C
rs12973410	chr19	16314202	A	G	-0.0162	0.0024	2.1e-11	0.1134	G	A
rs12462428	chr19	16583799	C	T	-0.0136	0.0018	1.1e-13	0.1977	T	C
rs1457090	chr19	16957811	G	C	-0.0143	0.0017	2.7e-16	0.2274	C	G
rs2279008	chr19	17172493	C	T	-0.0245	0.0017	1.1e-47	0.2539	T	C
rs2303745	chr19	17309480	T	G	-0.0118	0.002	2.1e-09	0.8347	G	T
rs7259703	chr19	17351983	A	G	0.0327	0.0054	1.3e-09	0.02216	G	A
rs10415893	chr19	17401603	A	G	-0.0233	0.0023	2.8e-24	0.1285	G	A
rs875396	chr19	18500337	G	A	-0.0166	0.0015	4.6e-28	0.3449	A	G
rs7252888	chr19	19517228	A	G	-0.0266	0.0019	1.8e-45	0.1818	G	A
rs8103992	chr19	19554834	C	A	-0.0264	0.0018	8.3e-48	0.7968	A	C
rs10405295	chr19	22425754	C	T	0.0088	0.0014	1.5e-09	0.4595	T	C
rs16963431	chr19	29853629	T	C	0.0123	0.0017	1.7e-13	0.2642	C	T
rs8101081	chr19	30558124	T	A	0.0222	0.0019	2.7e-30	0.1694	A	T
rs7253538	chr19	32343641	A	G	0.0158	0.0021	5e-14	0.1437	G	A
rs2305746	chr19	35065396	G	A	-0.022	0.0029	4.4e-14	0.9337	A	G
rs2280743	chr19	35735098	C	T	0.016	0.0017	8.4e-21	0.2319	T	C
rs11879644	chr19	37135274	G	C	-0.0182	0.0014	1.6e-36	0.5182	C	G
rs4801967	chr19	38938056	T	C	-0.0114	0.0018	2.3e-10	0.2833	C	T
rs598468	chr19	39048992	A	G	0.0116	0.0015	4.5e-14	0.3286	G	A
rs3815913	chr19	40614760	T	C	0.0333	0.005	2.1e-11	0.02169	C	T
rs2561528	chr19	40720510	G	C	0.0111	0.0015	9.5e-14	0.5855	C	G
rs15052	chr19	41307470	C	T	0.0117	0.002	4.1e-09	0.1641	T	C
rs17318596	chr19	41431190	A	G	0.0291	0.0015	1.2e-81	0.3603	G	A
rs2267630	chr19	42251546	A	G	-0.0333	0.003	2.3e-28	0.06805	G	A
rs2682560	chr19	43540396	T	C	0.0238	0.0018	4e-38	0.1939	C	T
rs10422017	chr19	44333093	G	A	0.0104	0.0015	4.6e-12	0.3682	A	G
rs2288912	chr19	44945942	G	C	-0.0121	0.0015	2.9e-16	0.4969	C	G
rs7256192	chr19	45835234	A	G	-0.0103	0.0015	8.2e-12	0.3548	G	A
rs3730849	chr19	48165538	A	G	0.0133	0.0015	7.3e-18	0.3811	G	A
rs6509437	chr19	49556461	A	G	0.0192	0.0023	1.2e-16	0.1313	G	A
rs2304204	chr19	49665763	C	T	0.0116	0.0017	1.2e-11	0.2565	T	C
rs2304524	chr19	54201472	G	C	-0.01	0.0015	1.9e-11	0.3951	C	G
rs2361797	chr19	54249685	G	A	0.0097	0.0015	5.9e-11	0.553	A	G
rs751729	chr19	55621295	A	G	0.0116	0.0018	4.7e-11	0.2192	G	A
rs3813143	chr19	56529507	A	G	0.0113	0.0016	9.1e-12	0.266	G	A
rs2215047	chr19	57311678	G	A	-0.0138	0.0017	7.5e-17	0.2516	A	G
rs4801540	chr19	58003347	G	C	-0.0097	0.0015	4.6e-11	0.4605	C	G
rs2207995	chr20	3313837	C	T	0.0152	0.0017	7.6e-19	0.2252	T	C
rs683808	chr20	3769239	G	A	-0.0102	0.0015	9.2e-12	0.5506	A	G
rs7273787	chr20	4117920	G	A	0.025	0.0015	1.7e-60	0.3368	A	G
rs2083918	chr20	5128866	G	A	-0.0257	0.0023	3.5e-28	0.1057	A	G
rs6038506	chr20	6453207	G	A	-0.0244	0.0014	1.3e-64	0.4822	A	G
rs1321432	chr20	6634044	C	A	-0.0466	0.0015	2.1e-212	0.6321	A	C
rs2143711	chr20	6682288	G	A	0.0189	0.0016	1.3e-31	0.286	A	G
rs6140062	chr20	6696177	A	G	0.0171	0.0022	1.9e-14	0.1248	G	A
rs6085658	chr20	6704730	T	C	-0.0174	0.0015	2.2e-31	0.4017	C	T
rs6085662	chr20	6717725	C	G	0.0186	0.0015	3.6e-34	0.3544	G	C
rs235768	chr20	6778468	T	A	-0.0123	0.0015	2e-16	0.612	A	T
rs6077205	chr20	7401258	C	T	-0.0141	0.0019	8.5e-14	0.1767	T	C
rs6077973	chr20	10946312	A	G	0.0157	0.0019	4.5e-16	0.1744	G	A
rs6040337	chr20	11075196	C	A	-0.0109	0.0016	8.4e-12	0.7091	A	C
rs17225014	chr20	11176127	C	T	-0.0112	0.0019	3.5e-09	0.1866	T	C
rs6034531	chr20	16560849	A	G	-0.0089	0.0015	7.2e-09	0.3204	G	A
rs2236250	chr20	17616086	T	C	0.014	0.0017	3e-16	0.7648	C	T
rs6080830	chr20	17790468	G	A	-0.0157	0.0014	2.5e-27	0.4348	A	G
rs6136595	chr20	19005614	G	T	0.0117	0.0016	1e-13	0.3037	T	G
rs6112527	chr20	19696532	T	C	0.0106	0.0014	2.3e-13	0.5401	C	T
rs7261425	chr20	20087991	G	C	-0.0171	0.0016	6.9e-26	0.2931	C	G
rs8117259	chr20	20367609	T	C	-0.0195	0.0019	7.6e-24	0.1867	C	T
rs6082353	chr20	21236818	C	A	-0.0192	0.0015	1.5e-35	0.6672	A	C
rs1075698	chr20	31800189	C	G	0.0158	0.0017	7.9e-20	0.2199	G	C
rs4911261	chr20	32803554	G	A	-0.0105	0.0014	4.4e-13	0.4453	A	G
rs34489266	chr20	33635234	G	A	-0.0540299	0.00960641	1.86198e-08	0.358	A	G
rs1074683	chr20	33716847	G	C	-0.0428	0.0016	3e-148	0.2484	C	G
rs742614	chr20	33894826	G	A	0.0119	0.0015	1.2e-15	0.5413	A	G
rs2377955	chr20	33937564	G	A	0.0096	0.0015	2.1e-10	0.6583	A	G
rs6141443	chr20	34014123	G	C	-0.0208	0.002	1.1e-24	0.1596	C	G
rs10485504	chr20	34072384	T	C	-0.0287	0.0029	1.1e-22	0.06402	C	T
rs6088580	chr20	34697249	C	G	0.0351	0.0015	1.7e-127	0.4584	G	C
rs6060355	chr20	35302258	A	G	0.0705	0.0015	0	0.3748	G	A
rs2425066	chr20	35339203	C	A	0.0631422	0.00930978	1.18235e-11	0.29784	A	C
rs6141600	chr20	36124388	C	T	0.045	0.0016	1.6e-164	0.2716	T	C
rs4810266	chr20	36627073	T	C	0.0345	0.0039	4.9e-19	0.03642	C	T
rs1744759	chr20	37110438	C	G	0.0324	0.002	1.4e-58	0.8535	G	C
rs6090501	chr20	37331411	C	T	0.0103	0.0015	2.9e-11	0.3068	T	C
rs2224538	chr20	39923436	C	T	-0.0183	0.0015	1.1e-33	0.3586	T	C
rs1358790	chr20	40220943	A	G	0.0145	0.002	6.9e-13	0.1487	G	A
rs8124620	chr20	41124776	A	G	-0.025	0.003	1.3e-16	0.05724	G	A
rs17265513	chr20	41203988	C	T	0.0147	0.0018	1.1e-15	0.1953	T	C
rs445912	chr20	43682448	C	T	-0.0192	0.0022	4.1e-18	0.8782	T	C
rs6031858	chr20	44900321	T	G	0.017	0.0016	1.9e-25	0.2803	G	T
rs6065781	chr20	45084168	C	T	-0.0188	0.0019	1.4e-23	0.1773	T	C
rs1967656	chr20	45859560	C	T	0.0089	0.0014	1e-09	0.5696	T	C
rs2868714	chr20	46257550	A	G	0.0087	0.0014	1.7e-09	0.5095	G	A
rs2034811	chr20	48177150	T	C	-0.0094	0.0015	2e-10	0.415	C	T
rs2273145	chr20	49223054	T	C	0.037	0.0017	1.6e-99	0.2184	C	T
rs238205	chr20	49244163	A	T	0.0231	0.0019	1.3e-32	0.8335	T	A
rs16995009	chr20	49985989	C	T	-0.028	0.0022	4.2e-36	0.1187	T	C
rs1971480	chr20	50280543	T	G	0.0101	0.0015	5.6e-11	0.6704	G	T
rs913678	chr20	50338887	C	T	-0.0117	0.0016	5.4e-14	0.3212	T	C
rs2426159	chr20	50556642	A	G	-0.0145	0.0014	5.8e-24	0.5137	G	A
rs2235863	chr20	51613923	G	A	-0.0097	0.0014	1.9e-11	0.511	A	G
rs6068097	chr20	52200491	G	C	-0.0102	0.0016	2e-10	0.2856	C	G
rs6021801	chr20	52233018	A	G	0.0152	0.0025	1.4e-09	0.09238	G	A
rs6123568	chr20	56251582	C	G	-0.029	0.005	5.1e-09	0.02508	G	C
rs4812042	chr20	58886860	A	G	-0.0192	0.0015	6.5e-36	0.6312	G	A
rs6100340	chr20	59109557	G	A	0.0226	0.0021	2.9e-26	0.1429	A	G
rs13043313	chr20	62383213	C	T	-0.0175	0.0016	4.6e-28	0.2855	T	C
rs3746765	chr20	62889442	T	C	0.0129	0.0015	8.8e-17	0.3337	C	T
rs6011066	chr20	63732828	A	G	0.0113	0.0015	1.5e-13	0.6964	G	A
rs3003137	chr20	64199449	T	G	-0.0105	0.0015	1.3e-12	0.4301	G	T
rs467238	chr21	16023837	G	A	-0.0166	0.0017	1.8e-22	0.7665	A	G
rs1699638	chr21	24075064	C	T	0.0089	0.0015	1.2e-09	0.5491	T	C
rs1827747	chr21	25840043	G	C	0.0112	0.0015	2.5e-13	0.6416	C	G
rs2830586	chr21	26933158	G	T	-0.0177	0.002	6.9e-19	0.1539	T	G
rs2832019	chr21	28739885	G	A	-0.0148	0.0021	1.3e-12	0.1469	A	G
rs2832218	chr21	29151864	G	T	0.0206	0.0025	4.8e-17	0.09688	T	G
rs9974470	chr21	33639760	T	A	0.012	0.0015	8.8e-16	0.3865	A	T
rs12482821	chr21	34188414	G	T	-0.0455	0.0051	3e-19	0.02631	T	G
[truncated: 35 more rows]
