# Supplementary material for: Whole genome sequencing and analysis of 4,053 individuals in trios and mother-infant duos from the Born in Guangzhou Cohort Study
Source: Research Square preprint supplement (doi:10.21203/rs.3.rs-1732885/v1), 2022-06-10
Supplement: Supplementary file 13 [file c41855f2d83f446ae568604a.xlsx]

## Sheet: Sheet1
Table S12. GWAS SNPs used to calculate the PRS for triglyceride (POS: GRCh38 coordinate; A: Effect allele)
SNP	CHR	POS	A	B	Beta	SE	P value	ALT allele frequency	REF	ALT
rs570155	chr1	35681379	T	G	-0.0678864	0.012389	4.26359e-08	0.25631	G	T
rs10889333	chr1	62491359	A	G	-0.11173	0.0128189	2.88111e-18	0.20063	G	A
rs7520810	chr1	62630040	T	C	-0.0974205	0.0129117	4.51824e-14	0.22606	C	T
rs62130713	chr2	27302793	G	A	-0.069342	0.0156279	9.1194e-06	0.15325	A	G
rs3817588	chr2	27508345	C	T	-0.171118	0.0133027	7.23206e-38	0.34494	T	C
rs1260333	chr2	27525757	A	G	0.197694	0.0120447	1.53471e-60	0.50273	A	G
rs4665988	chr2	27538569	A	C	0.173866	0.0110207	4.5289e-56	0.46064	C	A
rs13116176	chr4	3434861	A	G	-0.0625045	0.011292	3.10713e-08	0.46558	G	A
rs1178979	chr7	73442100	C	T	-0.167927	0.0185754	1.56257e-19	0.09994	T	C
rs61010704	chr7	73605645	G	A	-0.172036	0.0187273	4.06303e-20	0.09385	A	G
rs79108221	chr8	19969190	T	C	-0.207512	0.0177186	1.11247e-31	0.10189	C	T
rs920589	chr8	19996850	T	G	-0.125795	0.0134641	9.36481e-21	0.1919	G	T
rs6999813	chr8	20005960	A	T	-0.198331	0.0167091	1.70199e-32	0.10741	T	A
rs4403423	chr8	20018043	G	A	-0.000696049	0.0178101	0.968825	0.09671	A	G
rs73208819	chr8	20026413	C	T	0.11401	0.0198929	9.97282e-09	0.246	T	C
rs34288216	chr8	20074344	T	C	-0.119014	0.0134977	1.17196e-18	0.25591	C	T
rs117827315	chr9	109532784	G	T	-0.0680388	0.012125	2.00641e-08	0.23938	T	G
rs58089984	chr11	116639963	G	T	-0.0712465	0.0146886	1.23174e-06	0.44195	T	G
rs35165288	chr11	116646608	C	T	0.163773	0.0184059	5.69372e-19	0.13266	T	C
rs148462279	chr11	116672020	G	A	0.0998481	0.0139808	9.21155e-13	0.29828	A	G
rs61906102	chr11	116675786	C	T	0.0867523	0.0155001	2.18236e-08	0.16096	T	C
rs11216103	chr11	116703772	A	G	0.0524627	0.014232	0.000227583	0.18972	G	A
rs11216109	chr11	116710099	G	C	0.178529	0.0117731	6.10889e-52	0.31429	C	G
rs79100692	chr11	116722391	A	G	-0.152604	0.0156072	1.40232e-22	0.14868	G	A
rs34637368	chr11	116748889	A	G	-0.195609	0.0152045	7.06548e-38	0.19675	G	A
rs141740187	chr11	116766961	T	G	0.132123	0.0132995	2.94847e-23	0.25401	G	T
rs1263149	chr11	116769225	G	A	-0.12184	0.0113127	4.75985e-27	0.44218	A	G
rs664059	chr11	116771421	T	C	-0.0601757	0.0113398	1.11693e-07	0.49867	C	T
rs11216136	chr11	116776404	G	T	-0.178157	0.012475	2.86943e-46	0.29193	T	G
rs3741297	chr11	116786951	T	C	0.379056	0.0280583	1.37292e-41	0.05738	C	T
rs9804646	chr11	116794363	T	C	-0.173514	0.0149642	4.35469e-31	0.20847	C	T
rs1729409	chr11	116803052	G	A	-0.14683	0.0125764	1.70981e-31	0.40702	A	G
rs2849169	chr11	116809732	A	C	-0.040048	0.0134404	0.00288556	0.39388	C	A
rs2727784	chr11	116840425	T	C	-0.154301	0.012658	3.51428e-34	0.27547	C	T
rs11820814	chr11	116894984	C	T	0.159607	0.0246315	9.18491e-11	0.04985	T	C
rs12273762	chr11	116906347	A	T	-0.131846	0.0200654	5.00411e-11	0.07832	T	A
rs11216206	chr11	116972709	G	C	-0.0862471	0.0121639	1.3371e-12	0.31013	C	G
rs61905689	chr11	116998501	T	C	0.0613114	0.0182119	0.000761128	0.09622	C	T
rs7930264	chr11	117000050	A	G	-0.041649	0.0118278	0.000429468	0.26437	G	A
rs12271319	chr11	117008508	T	C	-0.116415	0.0155614	7.37532e-14	0.14202	C	T
rs4388921	chr11	117106062	C	T	-0.0298255	0.0139175	0.0321114	0.20081	T	C
rs7106437	chr11	117121360	C	T	-0.0937682	0.0129253	4.02777e-13	0.26665	T	C
rs6494005	chr15	58432325	G	A	-0.0946456	0.0155988	1.29923e-09	0.23233	A	G
rs588136	chr15	58438299	C	T	0.126627	0.0148037	1.19163e-17	0.63754	C	T
rs11912828	chr22	43952236	A	G	-0.0757306	0.0118077	1.42065e-10	0.34289	G	A
