# Supplementary material for: Whole genome sequencing and analysis of 4,053 individuals in trios and mother-infant duos from the Born in Guangzhou Cohort Study
Source: Research Square preprint supplement (doi:10.21203/rs.3.rs-1732885/v1), 2022-06-10
Supplement: Supplementary file 16 [file f1c6096f4ebcba94ce8253bd.xlsx]

## Sheet: Sheet1
Table S9. GWAS SNPs used to calculate the PRS for fasting plasma glucose (POS: GRCh38 coordinate; A: Effect allele)
SNP	CHR	POS	A	B	Beta	SE	P value	ALT allele frequency	REF	ALT
rs340874	chr1	213985913	C	T	0.0174	0.0032	6.8e-08	0.5175	T	C
rs1371614	chr2	26930006	T	C	0.0191	0.0045	2.36e-05	0.2513	C	T
rs1260334	chr2	27525730	A	C	0.069273	0.0123473	2.01887e-08	0.48798	C	A
rs13023879	chr2	168763130	T	C	-0.105579	0.0165999	2.01466e-10	0.23475	C	T
rs560887	chr2	168906638	C	T	0.0731	0.0034	4.68e-100	0.7019	T	C
rs479682	chr2	168938177	T	C	0.0972266	0.0118578	2.41631e-16	0.36902	C	T
rs11708067	chr3	123346931	G	A	-0.0222	0.0039	1.89e-08	0.2126	A	G
rs11920090	chr3	170999732	A	T	-0.0307	0.0046	1.9e-11	0.1492	T	A
rs13179048	chr5	96207022	A	C	-0.0271	0.0089	0.00748	0.317	C	A
rs10476553	chr5	96383142	C	G	-0.107934	0.0115113	6.82948e-21	0.34725	G	C
rs10951757	chr7	44130986	A	G	-0.0885128	0.0117096	4.06198e-14	0.45623	G	A
rs2971670	chr7	44186502	T	C	0.123316	0.0159106	9.14909e-15	0.19351	C	T
rs4841132	chr8	9326086	G	A	-0.037	0.014	4.85e-06	0.8846	A	G
rs11558471	chr8	117173494	G	A	-0.0333	0.0035	3.96e-21	0.322	A	G
rs59858868	chr9	687719	G	A	0.0799999	0.0128253	4.44156e-10	0.26114	A	G
rs7034200	chr9	4289050	A	C	0.0141	0.0032	8.7e-06	0.4949	C	A
rs10885122	chr10	111282335	G	T	0.0253	0.0051	5.5e-07	0.8827	T	G
rs7903146	chr10	112998590	T	C	0.0255	0.0036	9.55e-13	0.2844	C	T
rs11605924	chr11	45851540	C	A	-0.0233	0.0032	1.81e-13	0.5071	A	C
rs7944584	chr11	47314769	T	A	-0.0228	0.0036	3.85e-10	0.2703	A	T
rs174550	chr11	61804006	C	T	-0.0194	0.0033	4.25e-09	0.3592	T	C
rs11603334	chr11	72721940	A	G	-0.0176	0.0051	0.0004471	0.1917	G	A
rs7945617	chr11	92967121	C	T	0.122814	0.0125001	8.78379e-23	0.4651	T	C
rs10830963	chr11	92975544	G	C	0.0789	0.0038	8.72e-95	0.296	C	G
rs2293941	chr13	27917061	A	G	0.0167	0.0046	0.0002792	0.2316	G	A
rs7173964	chr15	62104743	A	G	-0.0221	0.0032	7.65e-12	0.451	G	A
rs73300991	chr20	22570688	T	C	-0.120946	0.0168596	7.29884e-13	0.13748	C	T
rs6036152	chr20	22575955	C	A	-0.118717	0.0153498	1.04131e-14	0.15397	A	C
rs6048205	chr20	22578963	G	A	-0.0296	0.0089	0.0008828	0.057	A	G
rs1203916	chr20	22595643	C	G	-0.108218	0.0166648	8.36938e-11	0.15936	G	C
