# Supplementary material for: Whole genome sequencing and analysis of 4,053 individuals in trios and mother-infant duos from the Born in Guangzhou Cohort Study
Source: Research Square preprint supplement (doi:10.21203/rs.3.rs-1732885/v1), 2022-06-10
Supplement: Supplementary file 18 [file 1e669225322e0f543f9a4548.docx]

## **Extended data Table 3 | Linear correlation and regression of the maternal phenotypes on the maternal PRS#**

| Trait | | Sample size | Beta | SE | CI2.5% | CI97.5% | *P* value | *R*2 |
| --- | --- | --- | --- | --- | --- | --- | --- | --- |
| Height  (cm) | Maternal genotype (h1+h2) | 1655 | 1.68 | 0.11 | 1.46 | 1.89 | 6.92E-51 | 0.163 |
| Maternal transmitted allele (h1) | 1655 | 1.14 | 0.11 | 0.92 | 1.36 | 1.27E-23 | 0.097 |
| Maternal nontransmitted allele (h2) | 1655 | 1.25 | 0.11 | 1.04 | 1.47 | 1.45E-28 | 0.109 |
| BMI  (kg/m2) | Maternal genotype (h1+h2) | 1655 | 0.49 | 0.07 | 0.36 | 0.62 | 9.06E-14 | 0.085 |
| Maternal transmitted allele (h1) | 1655 | 0.28 | 0.07 | 0.15 | 0.41 | 2.41E-05 | 0.063 |
| Maternal nontransmitted allele (h2) | 1655 | 0.42 | 0.07 | 0.29 | 0.55 | 2.61E-10 | 0.076 |
| BP (mmHg) | Maternal genotype (h1+h2) | 1517 | 0.68 | 0.18 | 0.33 | 1.03 | 1.32E-04 | 0.073 |
| Maternal transmitted allele (h1) | 1517 | 0.49 | 0.18 | 0.14 | 0.84 | 5.74E-03 | 0.069 |
| Maternal nontransmitted allele (h2) | 1517 | 0.48 | 0.18 | 0.13 | 0.83 | 7.74E-03 | 0.069 |
| FPG (mmol/L) | Maternal genotype (h1+h2) | 1584 | 0.08 | 0.01 | 0.06 | 0.10 | 6.70E-14 | 0.076 |
| Maternal transmitted allele (h1) | 1584 | 0.05 | 0.01 | 0.03 | 0.07 | 7.11E-07 | 0.057 |
| Maternal nontransmitted allele (h2) | 1584 | 0.06 | 0.01 | 0.04 | 0.08 | 3.20E-08 | 0.061 |
| TBA (umol/L) | Maternal genotype (h1+h2) | 1617 | 0.49 | 0.07 | 0.35 | 0.63 | 2.22E-11 | 0.025 |
| Maternal transmitted allele (h1) | 1617 | 0.32 | 0.07 | 0.18 | 0.47 | 1.01E-05 | 0.009 |
| Maternal nontransmitted allele (h2) | 1617 | 0.32 | 0.07 | 0.17 | 0.46 | 1.73E-05 | 0.009 |
| TG (mmol/L) | Maternal genotype (h1+h2) | 1457 | 0.20 | 0.02 | 0.17 | 0.24 | 4.69E-30 | 0.124 |
| Maternal transmitted allele (h1) | 1457 | 0.13 | 0.02 | 0.10 | 0.17 | 2.51E-13 | 0.077 |
| Maternal nontransmitted allele (h2) | 1457 | 0.17 | 0.02 | 0.13 | 0.20 | 2.08E-20 | 0.097 |
| TC (mmol/L) | Maternal genotype (h1+h2) | 1457 | 0.21 | 0.02 | 0.17 | 0.26 | 5.65E-18 | 0.058 |
| Maternal transmitted allele (h1) | 1457 | 0.13 | 0.02 | 0.09 | 0.18 | 8.18E-08 | 0.028 |
| Maternal nontransmitted allele (h2) | 1457 | 0.18 | 0.02 | 0.13 | 0.23 | 2.08E-12 | 0.041 |

**#***R2*indicates instrumental strength in the mendelian randomization analysis. Beta indicates the changes of the trait per unit changes of the PRS.
