# Supplementary material for: Whole genome sequencing and analysis of 4,053 individuals in trios and mother-infant duos from the Born in Guangzhou Cohort Study
Source: Research Square preprint supplement (doi:10.21203/rs.3.rs-1732885/v1), 2022-06-10
Supplement: Supplementary file 19 [file 639b8f766b1b08e0e05fd4f3.xlsx]

## Sheet: Sheet1
Table S2. The summary statistics of sequencing data and variant detected in each individual of BIGCS.
Sample	Adult (A) or Infant (C)	Geograhpical region	Province	Ethnicity	Dialect	Sex	Clean_reads	Clean_bases(M bp)	Clean_read1_Q20(%)	Clean_read2_Q20(%)	Clean_read1_Q30(%)	Clean_read2_Q30(%)	GC content(%)	Reads mapped	Mapped rate(%)	Reads properly paired	Percentage of properly paired reads(%)	Duplicated rate	Insert_size_average	Insert_size_standard_deviation	Sequencing depth	Genome coverage	X/A ratio	FREEMIX(Contamination rate)	Variant count	SNP	Insertion	Deletion	Ts/Tv	Het/Hom	Frameshift variant	Inframe deletion	Inframe insertion	Missense variant	Noncoding regions	Singleton	Start lost	Stop gained	Stop lost
00113051204M47BFF2	A	SouthChina	Guangdong	Han	Cantonese	Female	193406270	19333.3	97.78	96.16	91.12	86.92	40.72	193263866	99.9264	187936976	97.2	0.0204121	219.6	41.7	6.21243	0.985212	1.00278	0.000361965	3145862	2929713	96322	119827	2.20097	1.47173	159	67	40	9304	3126230	4432	40	113	49
00113061190M24BFF2	A	SouthChina	Guangdong	Han	Cantonese	Female	213923786	21383.5	98.16	97.44	91.98	90.04	40.9	213369663	99.741	207946854	97.2	0.0136468	202.7	39.4	6.85831	0.98556	0.983973	0.000277104	3142361	2924619	96423	121319	2.19953	1.46297	149	75	45	9383	3122690	5902	39	107	47
00113071013M25BFF2	A	SouthChina	Guangdong	Han	Cantonese	Female	208090860	20802	97.8	97.08	91.1	88.82	41.11	207553600	99.7418	200969668	96.6	0.0126086	208.6	44.4	6.67013	0.985806	0.974171	0.000370732	3159148	2940719	96876	121553	2.19937	1.48389	156	65	51	9468	3139315	4805	36	116	57
00113071048M26BFF2	A	CentralChina	Hubei	Han	Mandarin	Female	210744658	21062.2	98.11	96.1	91.85	87.49	41.12	210198595	99.7409	205422826	97.5	0.016244	207.3	44.5	6.75478	0.985764	0.981438	0.000788872	3148244	2931874	95949	120421	2.20033	1.46255	145	79	49	9208	3128814	6642	39	101	50
00113071071M25BFF2	A	SouthChina	Guangdong	Han	Hakka	Female	198925286	19885.4	97.81	97.29	91.15	89.33	41.38	198291948	99.6816	192982024	97	0.0120601	208.4	42.5	6.37407	0.984435	0.98224	8.09367e-05	3146798	2930109	95931	120758	2.20104	1.46636	147	89	44	9207	3127191	4679	37	112	40
00113071114M19BFF2	A	SouthChina	Guangdong	Han	Cantonese	Female	231411538	23130.2	98.28	96.86	92.12	88.91	41.32	231115940	99.8723	224260828	96.9	0.00654641	198.3	37.4	7.43313	0.986338	0.989313	0.000511407	3157197	2938365	96791	122041	2.20167	1.44828	170	79	42	9380	3137427	5388	36	114	45
00113071126M18BFF2	A	SouthChina	Guangdong	Han	Cantonese	Female	212071888	21198.8	98.13	97.34	91.93	89.87	41.38	211376571	99.6721	205907622	97.1	0.0135202	201.2	38.6	6.7944	0.985412	0.985036	1.02598e-08	3145509	2928352	96011	121146	2.19871	1.45183	165	79	49	9283	3125923	4926	43	116	50
00113071282m16bff2	A	SouthChina	Guangdong	Han	Cantonese	Female	228362720	22828.3	98.17	97.45	92.06	90.12	41.16	228017757	99.8489	221380536	96.9	0.0141365	200.7	40.6	7.33089	0.986472	0.968775	0.00015581	3141495	2925590	95737	120168	2.19703	1.46237	138	73	42	9309	3121929	9052	36	114	46
00113081003f00bff2	A	SouthChina	Guangdong	Han	Unknown	Male	201493208	20128.1	98.74	97.55	93.48	90.36	40.38	201278816	99.8936	193031684	95.8	0.0331392	203.7	42.7	6.46134	0.989906	0.518255	1.10626e-07	3139642	2921584	96593	121465	2.19902	1.51898	159	75	45	9180	3120113	9278	39	107	47
00113081003m18bff2	A	SouthwestChina	Chongqing	Han	Mandarin	Female	240164902	24004.5	98.02	97.72	92.03	90.78	41.15	239736341	99.8216	231629940	96.4	0.0161678	186.5	36.9	7.70449	0.986779	0.982067	0.000923514	3161490	2941201	97281	123008	2.19801	1.45107	166	75	45	9192	3141995	7160	43	125	47
00113081005F00BFF2	A	SouthChina	Guangdong	Han	Unknown	Male	195950562	19583.5	97.97	95.86	91.67	86.83	40.94	195702440	99.8734	190672560	97.3	0.0132622	215.6	41.9	6.28579	0.989663	0.513629	1.59899e-07	3136607	2919799	96285	120523	2.19733	1.47271	146	86	37	9249	3117008	5308	36	98	47
00113081005M18BFF3	A	SouthChina	Guangdong	Han	Hakka	Female	191904218	19182.1	98.11	96.91	91.98	88.88	40.71	191752605	99.921	185390146	96.6	0.0218324	218	41.2	6.16235	0.985083	1.02441	1.12797e-07	3145882	2927122	96832	121928	2.19935	1.44725	161	78	46	9290	3126354	5226	35	109	44
00113081012M19BFF2	A	SouthChina	Guangdong	Han	Cantonese	Female	206113300	20604.5	97.76	97.15	90.97	88.97	41.24	205707262	99.803	199979336	97	0.0120624	208.1	41.2	6.61072	0.985638	0.984863	0.000187314	3150531	2933506	96011	121014	2.20304	1.46193	169	80	45	9378	3130783	4823	32	121	38
00113081015F00BFF2	A	SouthChina	Guangdong	Han	Cantonese	Male	194511786	19435.3	98.73	97.4	93.51	90.18	40.97	194245809	99.8633	182679014	93.9	0.0313393	197.6	41.3	6.23667	0.989158	0.513212	7.52105e-07	3107457	2891594	95509	120354	2.19797	1.46232	146	71	44	9311	3088024	6758	36	110	40
00113081015M21BFF2	A	SouthChina	Guangdong	Han	Cantonese	Female	208791368	20864.2	97.87	97.37	91.45	89.78	41.59	208233219	99.7327	202950718	97.2	0.0138125	197.5	41.8	6.68085	0.984987	0.971688	1.9713e-07	3169774	2950600	97034	122140	2.20068	1.48286	159	79	46	9315	3150085	5337	35	103	47
00113081128F00BFF2	A	SouthChina	Guangdong	Han	Cantonese	Male	196557388	19647.8	98.2	95.88	91.86	87.18	40.94	196076768	99.7555	192464906	97.9	0.0156999	225.8	42.9	6.29548	0.989684	0.506058	0.00138636	3129955	2913218	96151	120586	2.19949	1.4621	158	77	40	9241	3110590	5294	35	104	43
00113081128M21BFF2	A	SouthChina	Guangdong	Han	Cantonese	Female	202555986	20244	98.14	95.8	91.95	87.08	41.19	201894847	99.6736	197356588	97.4	0.017076	205.4	39.5	6.48808	0.985151	0.972651	1.74529e-06	3166048	2947146	96935	121967	2.19836	1.4898	151	92	41	9412	3146212	5180	39	104	52
00113081144M23BFF2	A	SouthChina	Guangdong	Han	Cantonese	Female	198760484	19870.3	97.98	97.06	91.3	88.87	41.3	198345670	99.7913	193829522	97.5	0.0128647	219.1	43.9	6.37592	0.984752	0.972994	0.000227787	3148508	2931827	96177	120504	2.19744	1.45951	143	76	50	9410	3128721	5336	37	113	45
00113081180F00BFF2	A	SouthChina	Guangdong	Han	Cantonese	Male	195754920	19558.9	98.24	96.08	92.12	87.77	42.37	195009059	99.619	191896232	98	0.0184861	221.1	41.1	6.2686	0.983226	0.489557	0.000557802	3111299	2895726	95594	119979	2.20059	1.46042	152	85	43	9414	3091599	5275	40	95	49
00113081180M19BFF2	A	SouthChina	Guangdong	Han	Cantonese	Female	194652038	19459.4	97.84	97.44	91.33	89.9	41.16	194252386	99.7947	188916646	97.1	0.012302	200.9	39.7	6.24425	0.984083	0.979271	1.29506e-09	3142959	2925021	96504	121434	2.20231	1.44651	169	73	39	9188	3123378	4497	40	109	51
00113081213M17BFF2	A	SouthChina	Guangdong	Han	Hakka	Female	206978668	20692.3	97.76	97.22	90.99	89.06	40.9	206412991	99.7267	201539610	97.4	0.0125675	211.8	40.8	6.6342	0.985357	0.986397	0.00118667	3150090	2932863	96364	120863	2.20243	1.47897	167	83	40	9264	3130552	5011	35	112	51
00113081242F00BFF2	A	EastChina	Jiangsu	Han	Unknown	Male	186507180	18643.8	98.02	95.69	91.43	86.69	42.14	186119168	99.792	183090658	98.2	0.0152723	228.2	42.6	5.98069	0.986955	0.496641	0.000390506	3148592	2931076	96590	120926	2.20093	1.50034	151	86	45	9452	3128732	4167	36	115	52
00113081242M17BFF2	A	NorthwestChina	Shaanxi	Han	Mandarin	Female	212238382	21216.1	98.09	95.63	91.75	86.62	41.11	211403250	99.6065	206436980	97.3	0.0160914	211.7	42.5	6.79576	0.98591	0.981193	2.55082e-07	3175491	2954492	97767	123232	2.19927	1.48596	157	81	46	9367	3155866	7150	34	110	48
00113081253M20BFF2	A	SouthChina	Guangdong	Han	Cantonese	Female	200763886	20068.9	98.13	96.09	91.97	87.78	40.98	200361057	99.7994	195656782	97.5	0.0166344	201.9	38.4	6.44137	0.984801	0.962858	1.29951e-08	3136973	2921110	95819	120044	2.1999	1.46647	163	74	47	9266	3117325	5117	35	107	45
00113091003M25BFF2	A	SouthChina	Guangdong	Han	Cantonese	Female	194838296	19468.7	98.14	95.95	92.01	87.36	41.45	194182771	99.6636	189357632	97.2	0.0156808	204.7	40.5	6.23448	0.984151	0.974307	4.90956e-07	3153816	2937633	95723	120460	2.20188	1.52124	147	88	38	9399	3134114	4872	35	109	45
00113091014M16BFF2	A	SouthChina	Guangdong	Han	Cantonese	Female	234820468	23473.5	98.08	96.76	91.83	88.37	40.72	234664363	99.9335	227329000	96.8	0.0221138	218.7	41.5	7.54362	0.987974	1.00771	0.000328061	3163420	2942001	97852	123567	2.20222	1.45381	164	76	49	9374	3143645	4885	32	103	42
00113091021M18BFF2	A	SouthChina	Guangdong	Han	Cantonese	Female	214757454	21468	98.12	95.75	91.91	86.93	41.25	212430722	98.9166	207758884	96.7	0.0174846	209.1	41.4	6.82829	0.985695	0.979102	0.000892917	3162634	2943381	97144	122109	2.20064	1.46073	162	88	46	9503	3142604	4927	43	108	47
00113091056M16BFF2	A	SouthChina	Guangdong	Han	Cantonese	Female	222914002	22283.2	98.15	95.84	92	87.16	41.17	222221415	99.6893	216654488	97.2	0.0171335	202.5	39.2	7.14417	0.986228	0.988028	2.75127e-07	3160945	2942194	96877	121874	2.19999	1.45326	161	76	43	9496	3141048	3998	34	99	44
00113091086M23BFF2	A	NortheastChina	Jilin	Han	Mandarin	Female	213261050	21313.5	98.12	96.04	91.91	87.39	41.86	212587197	99.684	207864010	97.5	0.0165114	207.8	41.8	6.83321	0.985375	0.962017	0.000184321	3149961	2932868	96539	120554	2.20294	1.47505	142	74	41	9448	3130163	8008	42	107	41
00113091117M22BFF2	A	SouthChina	Guangdong	Han	Cantonese	Female	192964474	19288.2	98.1	95.93	91.85	87.19	41.67	192564472	99.7927	187242068	97	0.0152158	209.4	45.3	6.18954	0.983749	0.965288	1.70283e-08	3126297	2912158	94894	119245	2.20002	1.4381	165	85	34	9334	3106690	4737	40	106	45
00113091123F00BFF2	A	NorthChina	Shanxi	Han	Unknown	Male	323421872	32323	97.89	95.65	91.4	86.34	41.47	323023130	99.8767	314192756	97.1	0.0120147	221.9	42.9	10.3785	0.996334	0.505798	0.000118742	3164807	2940616	98643	125548	2.20041	1.52535	146	89	40	9435	3145120	8801	38	111	42
00113091123M20BFF2	A	SouthChina	Guangdong	Han	Cantonese	Female	191373480	19132.1	97.81	94.54	90.69	83.84	41.01	190591071	99.5912	186954388	97.7	0.0150799	233.8	45.5	6.12827	0.985186	0.979678	0.00059495	3159384	2939808	96959	122617	2.19729	1.50362	154	76	50	9354	3139671	4444	39	98	44
00113091168M18BFF2	A	CentralChina	Hubei	Han	Unknown	Female	205581286	20542.2	98.17	96.66	91.62	88.03	40.98	204852539	99.6455	201718048	98.1	0.0266515	217.2	41.5	6.58708	0.985281	0.984051	0.000648705	3147739	2931053	96054	120632	2.20066	1.47248	162	81	45	9196	3128098	6374	36	118	48
00113091177M16BFF2	A	SouthChina	Guangdong	Han	Cantonese	Female	209234060	20917.5	98.06	95.38	91.62	85.99	41.05	208370725	99.5874	203459604	97.2	0.0158153	212.9	39.8	6.70047	0.985987	0.986562	0.00039237	3130948	2915185	95625	120138	2.20264	1.43634	142	72	45	9204	3111543	4749	35	103	44
00113101038F00BFF2	A	SouthChina	Guangdong	Han	Cantonese	Male	213256472	21318.5	98.32	96.36	92.38	88.42	40.89	212688082	99.7335	208682264	97.9	0.0177953	213.4	38.7	6.83062	0.991021	0.514522	0.000541433	3134153	2916535	96523	121095	2.20102	1.47464	147	67	48	9429	3114418	4862	33	108	44
00113101038M26BFF2	A	SouthChina	Guangdong	Han	Cantonese	Female	177851076	17779.1	97.78	96.39	91.06	87.93	41.35	177476142	99.7892	171360106	96.4	0.0120744	214.7	50.2	5.70653	0.982111	0.972994	0.000812962	3141535	2925660	95988	119887	2.20148	1.46069	149	83	40	9318	3121951	4807	35	111	50
00113101051F16BFF2	A	SouthChina	Guangdong	Han	Cantonese	Male	241143944	24084.4	98.52	97.15	92.86	89.64	41.27	240815813	99.8639	230208586	95.5	0.0182601	177.5	35.6	7.72811	0.992167	0.507785	0.000875229	3123128	2904536	96324	122268	2.20135	1.48749	179	82	47	9392	3103536	8507	35	108	45
00113101051M26BFF2	A	SouthChina	Guangdong	Han	Cantonese	Female	198757832	19857.7	96.48	96.97	88.89	88.32	41.23	197606486	99.4207	194614890	97.9	0.0228749	218.4	41.3	6.31354	0.984738	0.989009	0.000888976	3168508	2948757	97227	122524	2.20129	1.51676	170	83	52	9558	3148416	5116	34	120	47
00113101113F00BFF2	A	SouthChina	Guangdong	Han	Cantonese	Male	209436140	20938	98.2	95.96	91.97	87.37	41.22	209033375	99.8077	205270986	98	0.0173621	223	40.7	6.71871	0.991157	0.510862	3.40481e-08	3131413	2913693	96379	121341	2.20258	1.47614	158	76	45	9256	3111880	3990	40	102	46
00113101113M21BFF2	A	SouthChina	Guangdong	Han	Cantonese	Female	213744418	21366.6	98.1	95.93	91.83	87.09	41.42	213282439	99.7839	208216486	97.4	0.0174517	212.8	43.5	6.85427	0.985878	0.993283	0.00156356	3148540	2929406	96785	122349	2.19891	1.44893	158	76	50	9369	3128867	4978	39	114	48
00113101128M26BFF2	A	SouthChina	Guangdong	Han	Cantonese	Female	182408522	18234.3	97.75	96.12	90.91	87.17	41.95	181577703	99.5445	176000540	96.5	0.0126216	221.5	51.7	5.83649	0.981513	0.943591	0.000168854	3129347	2915330	95132	118885	2.19998	1.46088	159	80	41	9205	3109808	4167	36	95	45
00113101142M17BFF2	A	NortheastChina	Liaoning	Han	Mandarin	Female	182917476	18286.2	98.04	95.97	91.64	87.22	41.09	182405520	99.7201	178014618	97.3	0.014658	211.8	41.1	5.86452	0.982711	0.984449	0.000123351	3140469	2925348	95629	119492	2.20334	1.47936	158	77	46	9252	3120916	6965	36	111	44
00113101167M17BFF2	A	SouthChina	Guangdong	Han	Hakka	Female	161647842	16154.5	96.11	96	87.66	85.41	40.64	160963903	99.5769	159437044	98.6	0.0187647	248.3	48.4	5.14341	0.97914	0.988288	4.06975e-08	3117374	2904784	94670	117920	2.20124	1.45926	160	70	39	9217	3097867	3531	34	104	43
00113101176M24BFF2	A	SouthChina	Guangdong	Han	Cantonese	Female	208910180	20884.1	97.81	96.71	91.16	88.5	41.3	208144945	99.6337	203012830	97.2	0.014007	211.7	41.4	6.69332	0.985588	0.992389	3.80542e-07	3162864	2945174	96629	121061	2.19817	1.47528	153	72	37	9443	3142940	4760	35	101	48
00113111019M16BFF2	A	SouthChina	Guangdong	Han	Min	Female	203335962	20323.4	98.15	96.14	92	87.63	41.06	202781683	99.7274	198328552	97.5	0.01556	204.9	38.9	6.5189	0.984858	0.983998	0.000237761	3158673	2941714	96141	120818	2.20064	1.47491	148	73	45	9256	3139030	4885	41	106	53
00113111072M19BFF2	A	SouthChina	Guangdong	Han	Cantonese	Female	199604196	19951.8	97.83	96.48	91.06	88.1	41.46	199014223	99.7044	194430480	97.4	0.0123201	215.8	42.1	6.39887	0.985119	0.977064	1.83607e-07	3155238	2938773	96131	120334	2.20032	1.46256	168	72	43	9231	3135745	4674	36	117	42
00113111093F00BFF2	A	SouthChina	Guangdong	Han	Cantonese	Male	205549856	20543.8	98.1	95.76	91.59	86.91	41.37	204955425	99.7108	201058950	97.8	0.0153691	229.2	44.5	6.58474	0.989146	0.506657	0.000126897	3127750	2910816	96099	120835	2.1999	1.50785	172	85	43	9302	3108364	4765	31	113	42
00113111093M16BFF2	A	SouthChina	Guangdong	Han	Cantonese	Female	183121852	18302.7	97.84	95.96	91.06	87.05	41.34	182608806	99.7198	176679742	96.5	0.011347	218.2	50.2	5.86758	0.983045	0.980201	9.00836e-09	3136191	2919711	95973	120507	2.20215	1.47156	162	85	44	9228	3116716	2775	41	116	48
00113111147M20BFF2	A	EastChina	Jiangxi	Han	Mandarin	Female	206625632	20655.4	97.88	96.58	91.39	88.33	41.72	206244027	99.8153	199868812	96.7	0.0132937	208.3	43.7	6.63154	0.984994	0.983303	9.11983e-08	3139598	2923516	95814	120268	2.20305	1.43838	167	86	36	9415	3119871	6627	41	115	44
00113111153F00BFF2	A	SouthChina	Guangdong	Han	Min	Male	219260662	21903.9	98.39	96.7	92.2	88.21	41.38	218953487	99.8599	211232920	96.3	0.0165033	198.7	39.2	7.03349	0.991324	0.502798	2.40434e-08	3324333	3095200	100717	128416	2.19877	1.97126	171	81	42	9863	3303636	9741	39	124	48
00113111153M25BFF2	A	SouthChina	Guangdong	Han	Min	Female	206598564	20653.3	98.37	97.06	92.29	89.06	41.02	206356680	99.8829	200928750	97.3	0.0157862	214.5	40.6	6.63651	0.985508	0.990637	0.000909635	3304555	3075255	100599	128701	2.19912	1.75826	170	98	50	9843	3283802	4854	36	118	50
00113111154M26BFF2	A	SouthwestChina	Guizhou	Han	Mandarin	Female	210423278	21037.2	98.24	96.64	91.83	87.93	41.02	210112487	99.8523	204699052	97.3	0.0163348	223	46.7	6.75944	0.986088	0.96786	0.000366404	3170762	2951289	97327	122146	2.2002	1.4823	157	80	37	9442	3151060	5488	35	107	41
00113111162F00BFF2	A	CentralChina	Hunan	Han	Unknown	Male	235749544	23567.5	98.24	95.94	92.08	87.37	41.14	235291871	99.8059	229733256	97.4	0.0170747	219.8	40.9	7.55763	0.99369	0.508952	2.86476e-07	3154574	2934012	97562	123000	2.20069	1.50328	157	86	43	9332	3134979	6536	41	105	44
00113111162M25BFF2	A	SouthChina	Guangdong	Han	Min	Female	185045326	18490.9	97.84	96.06	91.12	87.38	41.39	184425366	99.665	178115106	96.3	0.0125589	217	52.9	5.92422	0.983033	0.974202	0.00303897	3162058	2942949	97104	122005	2.20366	1.46912	166	85	44	9532	3142137	4127	37	102	41
00113111207M20BFF2	A	EastChina	Shandong	Han	Mandarin	Female	214320846	21422.3	97.84	96.28	91.05	87.7	41.45	213462195	99.5994	207499324	96.8	0.0111345	218.7	48.5	6.86214	0.986202	0.977873	0.000547022	3146248	2929265	96243	120740	2.20287	1.48316	168	79	40	9325	3126591	7207	38	111	51
00113111215F00BFF2	A	Unknown	Unknown	Han	Cantonese	Male	192644534	19251.4	98.36	96.4	92	87.38	41.05	192357670	99.8511	187025764	97.1	0.0166812	203.8	41.4	6.17834	0.987582	0.509515	1.96544e-07	3133099	2915872	96043	121184	2.1985	1.50493	154	82	48	9392	3113348	7127	37	109	51
00113111215M22BFF2	A	SouthChina	Guangdong	Han	Cantonese	Female	206613838	20653.7	98.36	96.92	92.26	88.73	40.98	206396349	99.8947	200705892	97.1	0.0174621	215.7	44.4	6.63632	0.985984	0.991728	0.000615042	3164377	2944218	97349	122810	2.20053	1.48302	153	79	43	9305	3144796	4514	39	106	46
00113111223M25BFF2	A	SouthChina	Guangdong	Han	Cantonese	Female	214708576	21464.9	98.32	96.74	92.12	88.25	41.62	214258115	99.7902	208587508	97.1	0.0176019	215.9	44.3	6.88998	0.985656	0.975444	0.000108672	3150253	2933138	96445	120670	2.20197	1.47468	162	70	44	9229	3130717	6225	47	112	41
00113118005M25BFF2	A	EastChina	Anhui	Han	Hui	Female	200379024	20029.8	97.89	96.41	91.25	88.01	41.53	199720709	99.6715	194499992	97.1	0.0109682	216.8	44.8	6.42051	0.985351	0.974939	0.00149171	3160294	2942537	96750	121007	2.20017	1.51804	149	75	42	9360	3140651	7282	38	113	41
00113118011F00BFF2	A	SouthChina	Guangdong	Han	Cantonese	Male	201319866	20118.5	98.34	96.37	91.97	87.29	40.96	200982738	99.8325	195059434	96.9	0.0171633	202.5	39.9	6.45559	0.989298	0.506579	1.44193e-07	3125860	2909757	95757	120346	2.19869	1.49129	161	75	46	9232	3106475	5043	39	99	50
00113118011M20BFF2	A	SouthChina	Guangdong	Han	Cantonese	Female	189576916	18937.1	97.89	96.16	91.24	87.59	41.28	188768029	99.5733	184036238	97.1	0.0112477	215.6	44.3	6.06052	0.983529	0.97786	0.000122938	3155490	2938364	96324	120802	2.20118	1.49771	171	69	48	9470	3135617	4857	35	119	52
00113121003M16BFF2	A	SouthChina	Guangdong	Han	Cantonese	Female	224559258	22446.8	97.92	96.46	91.31	88.06	41.02	224047473	99.7721	218590666	97.3	0.0133799	219.2	44.2	7.20372	0.986813	0.992475	6.1428e-09	3145194	2927724	96235	121235	2.19708	1.43331	152	82	35	9224	3125785	4982	39	119	46
00113121020F00BFF2	A	SouthChina	Guangdong	Han	Cantonese	Male	219762858	21962.4	97.95	95.91	91.64	87	41.74	219598290	99.9251	213857720	97.3	0.0115698	214.5	40.9	7.05695	0.991725	0.501768	0.00121233	3137699	2919015	96962	121722	2.19892	1.48312	167	87	54	9421	3117928	5558	32	110	41
00113121020M17BFF2	A	SouthChina	Guangdong	Han	Cantonese	Female	193142656	19307.1	97.83	96.33	91.17	87	40.98	192621862	99.7304	185811344	96.2	0.0117485	213.1	50.3	6.19253	0.984513	0.989435	0.000795761	3156897	2938785	96754	121358	2.19974	1.45903	173	78	40	9370	3137174	5749	38	109	49
00113121070M17BFF2	A	SouthChina	Guangdong	Han	Cantonese	Female	173658934	17346.4	96.39	96.76	88.54	87.66	40.65	172483005	99.3229	170682722	98.3	0.0222472	230.5	45.6	5.51086	0.980775	0.994868	0.000876891	3110175	2898262	94227	117686	2.19837	1.46228	138	76	41	9082	3090990	4643	37	109	44
00113121102M18BFF2	A	SouthChina	Guangdong	Han	Min	Female	203420206	20334.2	97.83	96.68	91.16	88.41	42.33	202974587	99.7809	197762336	97.2	0.0127249	214.1	42.9	6.52528	0.984652	0.944116	0.000242593	3137359	2921701	95848	119810	2.19888	1.45584	161	76	45	9374	3117679	4857	35	105	42
00113121120F33BFF2	A	SouthChina	Guangdong	Han	Cantonese	Male	176746880	17663.8	97.89	95.86	91.46	86.9	41.49	176577094	99.9039	171639696	97.1	0.011032	218.2	42.3	5.67316	0.986455	0.504663	2.00658e-07	3103895	2888898	95593	119404	2.19743	1.46826	152	76	47	9219	3084468	4616	34	110	45
00113121120M16BFF2	A	SouthChina	Guangdong	Han	Cantonese	Female	223724022	22358.7	98.06	97.22	92.13	90.2	41.75	223207416	99.7691	216597622	96.8	0.0143944	187.9	36	7.172	0.986023	0.971143	5.51988e-08	3174274	2953575	97528	123171	2.19967	1.49024	145	78	41	9400	3154481	5156	35	100	47
00113121134M21BFF2	A	SouthChina	Guangdong	Han	Cantonese	Female	241667532	24156.4	98.53	97.58	93.12	90.78	42.04	241303907	99.8495	233410990	96.6	0.0198754	187.5	37.3	7.75712	0.986544	0.975777	0.000165991	3163353	2943906	96895	122552	2.20132	1.47642	152	84	45	9500	3143504	5678	42	107	51
00113121165F00BFF2	A	EastChina	Jiangxi	Han	Unknown	Male	179535064	17940.8	97.93	96.02	91.53	87.21	41.26	179314348	99.8771	174766724	97.3	0.0122939	220.1	42.8	5.76106	0.986897	0.505707	0.00057607	3098517	2883889	95273	119355	2.1998	1.4734	140	80	44	9119	3079335	5980	34	108	48
00113121165M15BFF2	A	SouthwestChina	Sichuan	Miao	Mandarin	Female	202706010	20264.6	98.21	96.4	91.67	87.36	41.46	202449511	99.8735	196579026	97	0.0163321	224.3	49.8	6.50906	0.985083	0.979869	0.000613834	3159911	2940721	97008	122182	2.19875	1.47837	142	91	42	9482	3140026	6363	36	109	50
00113121190M22BFF2	A	EastChina	Shandong	Han	Mandarin	Female	202004442	20191.8	98.24	97.1	92.06	89.15	40.91	201650768	99.8249	197068392	97.6	0.0164044	209.7	40.1	6.48249	0.98477	0.982122	0.000263962	3150106	2932307	96405	121394	2.20158	1.43289	156	80	41	9115	3130656	7080	40	119	44
00113128013F00BFF2	A	SouthChina	Guangxi	Zhuang	Unknown	Male	198444354	19838.3	98.15	97.04	91.66	88.85	40.99	198132204	99.8427	194681368	98.1	0.00981894	233.5	44.1	6.37134	0.989651	0.509489	0.00203325	3131395	2913557	96512	121326	2.20211	1.4806	158	86	43	9305	3111817	5479	41	114	49
00113128013M26BFF2	A	SouthChina	Guangdong	Han	Cantonese	Female	200411534	20034.6	98.32	97	92.16	88.97	41.38	200179553	99.8842	195147350	97.4	0.0164333	214.3	43.8	6.43773	0.984802	0.939138	1.713e-17	3169415	2949665	97285	122465	2.20158	1.48018	163	82	42	9477	3149552	5289	40	113	37
00113129002M23BFF2	A	SouthChina	Guangdong	Han	Min	Female	200565482	20039.9	96.5	97.07	88.96	88.61	41.48	199535134	99.4863	196782258	98.1	0.0222324	218.7	41.8	6.37303	0.98486	0.975296	0.00191186	3141594	2926411	95477	119706	2.1978	1.46252	145	76	38	9220	3122268	4689	39	99	48
00114011025M18BFF2	A	SouthChina	Guangdong	Han	Cantonese	Female	198152648	19807.2	98.24	97.01	92.1	89.05	41.21	197515123	99.6783	191963164	96.9	0.0165134	204.9	41.1	6.34864	0.984201	0.988868	2.49286e-07	3124258	2909580	95583	119095	2.1999	1.46348	153	82	45	9223	3104771	4630	39	112	48
00114011050F00BFF2	A	SouthChina	Guangdong	Han	Mandarin	Male	202350688	20225.7	98.25	96.16	92.13	87.85	40.84	201929951	99.7921	197784430	97.7	0.0168981	219.8	40.1	6.48885	0.990392	0.515388	3.97468e-07	3128606	2911919	96162	120525	2.19524	1.49548	146	76	36	9250	3109002	5433	42	109	40
00114011050M17BFF2	A	SouthChina	Guangdong	Han	Mandarin	Female	224843128	22474.6	98.25	97.09	92.09	89.14	40.65	224358010	99.7842	219160534	97.5	0.0182804	208.2	41.4	7.21378	0.986466	1.00475	0.000590908	3152076	2932975	96837	122264	2.19782	1.45341	153	66	42	9223	3132718	5355	39	117	47
00114011120F00BFF2	A	SouthChina	Guangdong	Han	Unknown	Male	237735232	23752.4	98.44	97.26	92.83	89.89	41	237271055	99.8048	230370988	96.9	0.0180631	200.6	39.1	7.62114	0.992803	0.527189	4.32439e-08	3135357	2916272	96836	122249	2.19956	1.45768	149	73	36	9359	3115753	4930	34	107	44
00114011120M16BFF2	A	SouthChina	Guangdong	Han	Mandarin	Female	243233570	24305.7	96.45	96	88.75	88.39	40.75	242014195	99.4987	238604220	98.1	0.0220914	219.9	41.5	7.73293	0.987362	1.00019	0.000293857	3181828	2960489	97885	123454	2.19755	1.47983	160	70	41	9454	3161919	5345	40	119	43
00114011138M21BFF2	A	SouthwestChina	Sichuan	Han	Mandarin	Female	212470434	21241.1	97.93	96.83	91.1	88.15	41.36	211935166	99.7481	207037046	97.4	0.0129352	224.2	45.7	6.81408	0.986313	0.965934	0.000821331	3153152	2935341	96569	121242	2.20337	1.47651	150	70	41	9291	3133566	6549	34	113	45
00114011155M27BFF2	A	EastChina	Zhejiang	Han	Wu	Female	196039460	19596.7	95.32	96.12	87.58	87.11	41.38	195320924	99.6335	191275132	97.6	0.0108259	228.1	46.1	6.1999	0.985006	0.980533	4.16282e-07	3127734	2913329	95325	119080	2.19816	1.45155	154	72	42	9239	3108150	5414	34	96	52
00114011171M24BFF2	A	SouthChina	Guangdong	Han	Cantonese	Female	226391654	22628.2	98.25	97.12	92.11	89.25	41.16	226064134	99.8553	220453676	97.4	0.0176986	202	38.6	7.26659	0.986327	0.977661	0.000131759	3150071	2932015	96331	121725	2.19958	1.47068	148	79	46	9273	3130486	5479	39	105	47
00114011189M23BFF2	A	SouthChina	Guangdong	Han	Cantonese	Female	200410080	20033.3	95.34	96.24	87.68	87.53	41.17	199945990	99.7684	195008328	97.3	0.0115575	219.8	44.4	6.34196	0.9854	0.972737	1.26932e-07	3124052	2911543	94457	118052	2.19928	1.4103	143	83	45	9242	3104481	7201	36	114	48
00114021011M19BFF2	A	SouthChina	Guangdong	Han	Cantonese	Female	252849586	25263.6	96.67	97.37	89.48	89.55	40.7	251520479	99.4743	247442660	97.9	0.025186	204.7	38	8.03826	0.987544	1.01619	0.000451646	3162536	2945066	96387	121083	2.20029	1.47343	151	76	46	9428	3142893	8578	41	112	47
00114021053F00BFF2	A	SouthChina	Guangdong	Han	Cantonese	Male	224657412	22451	98.33	97.43	92.43	90.12	41.14	224196538	99.7949	219148534	97.5	0.0107553	210.4	39.5	7.20464	0.992093	0.511575	4.37569e-06	3148349	2929488	96994	121867	2.19676	1.4851	166	68	41	9266	3128808	5773	40	105	51
00114021053M19BFF2	A	SouthChina	Guangdong	Han	Cantonese	Female	216076644	21601.6	95.41	96.33	87.82	87.67	41.42	215362498	99.6695	210264588	97.3	0.0108541	217.8	43.3	6.83631	0.986528	0.991994	1.26254e-07	3165181	2946154	96926	122101	2.20136	1.46534	170	86	45	9401	3145251	4840	36	115	52
00114021078M19BFF2	A	SouthChina	Guangdong	Han	Cantonese	Female	206005324	20590.8	98.25	97.06	92.15	89.1	41.41	205658343	99.8316	200613424	97.4	0.0178327	207.6	40.6	6.61113	0.985282	0.982759	0.000147024	3155183	2937918	96612	120653	2.20137	1.48166	150	87	44	9418	3135391	4922	45	112	47
00114021169F00BFF2	A	SouthChina	Guangdong	Han	Unknown	Male	193213808	19310.2	98.36	96.6	92.05	87.95	40.78	192903459	99.8394	187589646	97.1	0.0168233	201.6	38.8	6.19692	0.987863	0.510087	0.000653589	3117099	2901070	95576	120453	2.20046	1.45147	151	68	37	9156	3097792	3968	44	102	44
00114021169M24BFF2	A	SouthChina	Guangdong	Han	Cantonese	Female	190334842	19028.5	97.64	95.16	90.59	85.74	41.27	189939182	99.7921	185963948	97.7	0.0107165	216.3	41.4	6.10491	0.984145	0.991024	3.14962e-08	3146633	2929338	96201	121094	2.19938	1.45837	153	72	40	9358	3126953	4462	39	106	45
00114021188F00BFF2	A	SouthChina	Guangdong	Han	Cantonese	Male	210778676	21065.1	98.31	96.34	91.78	87.2	40.94	210499989	99.8678	204993626	97.3	0.016053	209.2	41.4	6.76481	0.990835	0.511702	2.51949e-07	3132978	2915235	96236	121507	2.19829	1.49701	149	73	37	9178	3113549	4930	34	105	46
00114021188M16BFF2	A	SouthChina	Guangdong	Han	Cantonese	Female	181186760	18112.3	98.12	96.78	91.6	88.29	41.61	180784081	99.7778	176263506	97.3	0.014495	217.6	44	5.81242	0.982456	0.980744	0.000861214	3147483	2930212	96284	120987	2.20323	1.45848	139	76	43	9288	3127856	4587	42	115	53
00114021202F00BFF2	A	SouthChina	Guangdong	Han	Unknown	Male	209510284	20939.2	98.22	97.18	91.95	89.34	41.08	208926612	99.7214	204501712	97.6	0.0112108	227	43.2	6.71416	0.990528	0.503731	0.000629324	3124219	2906740	96247	121232	2.19843	1.45701	151	80	41	9348	3104656	5021	44	111	51
00114021202M18BFF2	A	NorthwestChina	Gansu	Han	Mandarin	Female	213118640	21304.9	98.18	96.94	91.87	88.72	41.03	212390612	99.6584	207345048	97.3	0.0171437	210.9	43.4	6.83018	0.985727	0.994125	0.00109209	3165761	2945686	97162	122913	2.2041	1.51981	170	93	44	9301	3146144	7976	37	112	43
00114029009F00BFF2	A	SouthChina	Guangdong	Han	Cantonese	Male	239374172	23920.1	97.7	97.97	92.18	91.81	41.11	238994390	99.8413	233136160	97.4	0.00582654	212.6	40.6	7.65523	0.993213	0.50539	0.000326119	3125546	2907538	96574	121434	2.20237	1.46546	160	64	43	9159	3106168	6180	39	111	49
00114029009M19BFF2	A	SouthChina	Guangdong	Han	Cantonese	Female	191919836	19185.3	97.7	95.82	90.78	85.9	40.85	191776734	99.9254	186923436	97.4	0.0179617	228.4	42.3	6.16514	0.985221	0.997142	4.71418e-07	3166748	2947795	96747	122206	2.20131	1.50485	149	80	38	9277	3147186	4727	43	102	44
00114031029M00BFF1	A	CentralChina	Hubei	Han	Unknown	Male	235903616	23573.1	98.7	97.22	93.23	89.36	40.66	235627778	99.8831	228037438	96.7	0.0280163	211.4	43.1	7.57086	0.99382	0.514143	0.000389537	3124285	2908344	95854	120087	2.19906	1.47302	151	71	49	9164	3104868	11589	38	111	47
00114031029M17BFF2	A	CentralChina	Hunan	Han	Xiang	Female	192348492	19228.5	95.33	96.19	87.62	87.4	41.27	191831551	99.7312	186322818	96.9	0.0107774	222.7	49.6	6.08779	0.984354	0.989691	2.86107e-07	3109751	2898904	93902	116945	2.20567	1.42974	145	76	41	9058	3090464	8010	41	101	44
00114031043M26BFF2	A	EastChina	Shandong	Han	Mandarin	Female	199864146	19978.5	97.94	96.38	91.02	87.18	41.02	199522203	99.8289	195166774	97.6	0.012014	222.2	43.5	6.41592	0.985046	0.983309	0.00128804	3130297	2913639	96078	120580	2.19898	1.45794	155	78	50	9204	3110882	7292	40	114	45
00114031072M21BFF2	A	CentralChina	Henan	Han	Mandarin	Female	226861114	22678.4	95.42	96.57	87.92	88.32	41.33	226127955	99.6768	220479080	97.2	0.0119572	210.2	41.9	7.17743	0.986581	0.983592	0.000142552	3152699	2934001	96728	121970	2.20234	1.49604	141	77	45	9263	3133081	7956	36	103	44
00114031107M23BFF2	A	CentralChina	Hubei	Han	Mandarin	Female	216382330	21632.7	97.99	96.87	91.26	88.25	40.92	215811744	99.7363	210659024	97.4	0.0125106	221.6	44	6.94041	0.986173	0.99067	0.000311204	3162872	2943864	96739	122269	2.19853	1.47552	175	77	40	9389	3143025	6698	34	116	43
00114031119M26BFF2	A	EastChina	Jiangsu	Han	Wu	Female	185293640	18521.8	97.99	96.64	91.24	87.96	41.11	184899462	99.7873	180408844	97.4	0.0129793	218.2	44.8	5.94407	0.983572	0.978731	0.00151614	3143945	2928302	95821	119822	2.19998	1.47217	147	81	44	9253	3124354	6505	45	115	48
00114031182M22BFF2	A	SouthChina	Guangdong	Han	Cantonese	Female	186797844	18672.6	97.66	95.54	90.72	86.7	41.61	186480904	99.8303	182361702	97.6	0.0118075	211.5	44	5.99087	0.983717	0.985692	9.48883e-08	3120267	2906837	94766	118664	2.20215	1.46016	145	72	41	9145	3100921	4523	31	117	48
00114031247F25BFF2	A	SouthChina	Guangdong	Han	Cantonese	Male	217700904	21757.8	98.19	96.96	91.83	88.78	41.3	217173862	99.7579	211945376	97.4	0.0113185	227.9	44.2	6.97751	0.991683	0.501368	2.59556e-08	3116605	2902535	95282	118788	2.20177	1.45111	149	70	42	9350	3096810	9186	43	112	44
00114031247M17BFF2	A	SouthChina	Guangdong	Han	Cantonese	Female	205266322	20520.9	95.28	96.19	87.54	87.3	41.63	204756864	99.7518	200043428	97.5	0.0113909	225.4	44.7	6.49843	0.985754	0.947202	0.000658637	3134708	2921537	94876	118295	2.20248	1.46537	163	72	44	9425	3114980	7397	37	114	46
00114031267M20BFF2	A	SouthChina	Guangdong	Han	Cantonese	Female	193260082	19320.2	97.55	95.08	90	85.43	41.4	192759641	99.7411	188638146	97.6	0.0108078	224.3	43.3	6.19554	0.985181	0.987498	2.10114e-07	3131928	2919105	94689	118134	2.19937	1.44854	149	72	44	9435	3112165	7043	34	117	42
00114031297F00BFF2	A	SouthChina	Guangdong	Han	Cantonese	Male	207283458	20716.5	98.3	96.31	91	87.11	40.83	207033470	99.8794	201718904	97.3	0.0166582	208.2	40.4	6.65366	0.990034	0.514129	0.00114436	3106397	2894221	94065	118111	2.20352	1.44451	147	72	46	9208	3087047	7305	33	103	45
00114031297M24BFF2	A	SouthChina	Guangdong	Han	Cantonese	Female	196414762	19631.8	98.09	96.57	91.62	88.19	41.03	195909729	99.7429	190042618	96.8	0.0145138	215.7	48	6.29474	0.984725	0.989998	0.000278763	3129410	2916184	94820	118406	2.19649	1.44746	143	78	48	9237	3110020	7616	38	94	44
00114031300M24BFF2	A	SouthChina	Guangdong	Han	Cantonese	Female	210952526	21087.3	98.02	96.69	91.37	88.01	41.17	210330435	99.7051	205914734	97.6	0.0139517	216.1	42.2	6.76223	0.985864	0.990523	0.000100221	3149058	2933594	95652	119812	2.19981	1.48979	163	83	45	9297	3129380	7940	33	108	46
00114041042M26BFF2	A	SouthChina	Guangdong	Han	Cantonese	Female	199682290	19961.2	97.56	95.02	90.38	85.46	41.9	199121076	99.7189	194512616	97.4	0.0114102	218.7	48.7	6.39937	0.984773	0.970897	1.62375e-07	3122576	2910144	94673	117759	2.19836	1.41746	140	71	44	9157	3103111	7222	35	114	49
00114041063F00BFF2	A	SouthChina	Guangdong	Han	Unknown	Male	219310820	21918.9	98.19	97	91.83	88.88	41.16	218805514	99.7696	214304312	97.7	0.0110796	227.4	44.2	7.03038	0.992168	0.507477	8.69296e-05	3135449	2916861	96548	122040	2.19632	1.49719	153	87	47	9330	3115754	5447	37	95	50
00114041063M19BFF2	A	NortheastChina	Jilin	Han	Mandarin	Female	207029518	20696.7	98.06	96.44	91.48	87.68	41	206219534	99.6088	200204784	96.7	0.0148766	224.8	50.7	6.62869	0.985597	1.00362	1.30995e-07	3168820	2948524	97484	122812	2.20087	1.48738	150	77	50	9274	3149354	7656	41	102	44
00114041074M27BFF2	A	SouthChina	Guangdong	Han	Cantonese	Female	236053988	23594.9	98.05	97.7	92.05	90.84	41.16	235623303	99.8175	227813786	96.5	0.0164404	188.2	36.1	7.57092	0.986825	0.983927	0.000157896	3131507	2916318	94940	120249	2.19883	1.43725	163	76	45	9313	3111915	8344	47	108	47
00114041086M17BFF2	A	CentralChina	Henan	Han	Mandarin	Female	210220750	21014.6	98.05	96.63	91.45	88.12	41.67	209944994	99.8688	204540242	97.3	0.0152086	218.2	43.3	6.7511	0.985386	0.978451	7.44488e-07	3149058	2931511	96628	120919	2.20178	1.47731	172	76	44	9398	3129252	8370	50	118	45
00114041185F00BFF2	A	SouthChina	Guangdong	Han	Cantonese	Male	210405964	21026.5	98.41	96.97	92.65	88.96	41.62	209870324	99.7454	204875046	97.4	0.00714436	224.5	42.2	6.74706	0.98963	0.495816	0.000535826	3117441	2900110	95984	121347	2.20137	1.47295	165	76	46	9325	3097765	5677	38	121	49
00114041185M19BFF2	A	SouthChina	Guangdong	Han	Cantonese	Female	217217718	21699.6	97.93	97.02	90.79	88.7	41.27	215841216	99.3663	212553740	97.9	0.0229011	207.2	40	6.93986	0.985588	1.00773	0.00037812	3164094	2944028	97236	122830	2.19903	1.46616	174	85	44	9412	3144352	5292	38	102	49
00114041205F29BFF2	A	SouthChina	Guangdong	Han	Cantonese	Male	216778286	21673.2	98.06	96.62	91.28	87.72	41.4	216216711	99.7409	212099116	97.8	0.00937314	239.6	45.3	6.95095	0.991068	0.501587	1.15634e-07	3130727	2911649	97015	122063	2.20085	1.48133	159	74	47	9294	3110992	4456	38	116	41
00114041205M17BFF2	A	SouthChina	Guangdong	Han	Cantonese	Female	163031564	16297.1	97.64	95.23	90.61	85.95	41.27	162572419	99.7184	158997082	97.5	0.0107861	215.7	42	5.22428	0.979979	0.993725	4.49402e-08	3136795	2920274	95960	120561	2.20251	1.46213	156	75	44	9321	3117156	4230	35	120	43
00114041214M26BFF2	A	SouthChina	Guangdong	Han	Cantonese	Female	225616068	22551.6	97.88	96.57	91.49	88.03	40.88	225423442	99.9146	219078756	97.1	0.0198256	212.5	39.6	7.24477	0.986779	1.00773	0.000852101	3143601	2927368	95759	120474	2.19927	1.44887	145	68	42	9435	3123910	7864	44	101	45
00114041245F27BFF2	A	SouthChina	Guangdong	Han	Cantonese	Male	236302050	23620.9	98.38	97.62	92.59	90.68	41.38	235675853	99.735	230246990	97.4	0.0127215	211.7	38.9	7.5731	0.992749	0.505189	1.5706e-09	3143440	2926698	96232	120510	2.19877	1.49849	163	73	45	9278	3123824	8518	42	103	43
00114041245M25BFF2	A	SouthChina	Guangdong	Han	Cantonese	Female	215179738	21508.5	97.9	97.3	91.47	89.64	40.89	214662760	99.7597	207674262	96.5	0.0139167	197.9	41.4	6.90068	0.985421	0.969956	2.99041e-09	3131986	2917767	95216	119003	2.20001	1.44038	153	79	39	9250	3112561	7850	36	94	43
00114041263M19BFF2	A	CentralChina	Hunan	Han	Xiang	Female	190418762	19032.4	97.7	95.49	90.81	86.53	41.33	190043176	99.8028	185864786	97.6	0.0123391	212.8	41.5	6.10756	0.984485	0.98645	0.000862397	3123846	2911925	94734	117187	2.20132	1.44862	159	81	38	9149	3104456	9378	36	107	47
00114041283M18BFF2	A	SouthChina	Guangdong	Han	Hakka	Female	184827144	18477.5	97.58	95.01	90.38	85.37	41.11	184511160	99.829	180496340	97.7	0.0113346	223.5	46.6	5.93118	0.983955	0.999194	9.20508e-09	3115778	2904538	94030	117210	2.204	1.41865	162	79	39	9239	3096305	7274	34	112	48
00114041294M17BFF2	A	SouthwestChina	Sichuan	Han	Mandarin	Female	192134676	19207.9	98.05	96.65	91.53	88.36	41.75	191013421	99.4164	184869454	96.2	0.0146663	216.4	49.3	6.14093	0.983848	0.98275	0.000914829	3116537	2904616	94604	117317	2.19993	1.46798	144	82	46	9233	3097176	9633	45	104	42
00114041390M24BFF2	A	CentralChina	Henan	Han	Mandarin	Female	218817654	21866.6	98.31	97.42	92.27	89.91	41.13	218503676	99.8565	213313734	97.5	0.0192821	222.5	45.2	7.02203	0.986909	0.985506	0.000246925	3168539	2948440	97325	122774	2.19786	1.47005	157	75	47	9516	3148612	7959	42	112	50
00114041399M18BFF2	A	SouthChina	Guangdong	Han	Cantonese	Female	226626570	22656.4	98.08	96.79	91.59	88.49	41.31	226206438	99.8146	220906610	97.5	0.0152162	217.4	41.7	7.27404	0.986959	0.975167	0.000216548	3169988	2950361	97148	122479	2.20153	1.4911	162	86	37	9479	3150128	5607	41	105	49
00114041443M21BFF2	A	SouthChina	Guangdong	Han	Hakka	Female	207969604	20787.9	97.99	97.72	91.89	90.93	41.1	207520209	99.7839	200490620	96.4	0.014233	187.6	35.6	6.67064	0.984738	0.982709	0.000301043	3159620	2941938	96155	121527	2.2003	1.50035	163	91	38	9240	3140077	4891	37	102	45
00114049005F00BFF2	A	SouthChina	Guangdong	Han	Cantonese	Male	179751396	17965.5	97.36	96.25	89.66	86.85	40.88	179413326	99.8119	175016742	97.4	0.0298561	233.9	48.5	5.76304	0.986607	0.509253	0.000470511	3118623	2902686	95825	120112	2.19807	1.4791	148	69	45	9241	3099293	5121	39	89	42
00114051005F00BFF2	A	SouthChina	Guangdong	Han	Cantonese	Male	225741226	22563	98.17	96.44	91.7	87.19	41.7	225196652	99.7588	218461820	96.8	0.0375776	221.1	47.1	7.23355	0.989389	0.490205	0.000571562	3125931	2908608	96298	121025	2.20006	1.47752	155	87	49	9301	3106293	6118	39	99	46
00114051005M21BFF2	A	SouthChina	Guangdong	Han	Cantonese	Female	177118392	17701.1	98.33	97.35	92.31	89.79	41.45	176699085	99.7633	172627596	97.5	0.0155211	222.3	45.5	5.67922	0.982775	0.987206	0.0005744	3150370	2934121	96046	120203	2.20001	1.49149	131	80	43	9442	3130725	4767	34	97	46
00114051023F00BFF2	A	SouthChina	Guangxi	Han	Unknown	Male	207292082	20722.6	98.04	96.63	91.62	87.95	40.36	207020732	99.8691	201127240	97	0.023406	218.4	40.6	6.6533	0.991062	0.525499	0.000804561	3117363	2900780	95935	120648	2.19588	1.46769	158	78	39	9154	3098093	4668	40	114	42
00114051023M25BFF2	A	CentralChina	Hunan	Han	Xiang	Female	227609034	22747.8	98.29	97.39	92.19	89.88	40.91	226804068	99.6463	221662210	97.4	0.0191664	222.4	45.2	7.28923	0.987396	0.989346	0.00758424	3158907	2938443	97473	122991	2.19948	1.48619	163	89	39	9480	3138937	6182	40	105	46
00114051039M18BFF2	A	SouthChina	Guangdong	Han	Cantonese	Female	208754666	20868.8	98	96.22	91.26	87.09	41.41	208548795	99.9014	202497524	97	0.014849	226.5	50.3	6.70354	0.986605	0.962185	1.08517e-07	3146261	2928662	96434	121165	2.20264	1.46447	155	81	42	9381	3126522	5420	35	107	41
00114051053M20BFF2	A	EastChina	Jiangsu	Han	Wu	Female	222785176	22270.6	97.94	97.42	91.62	89.99	41.02	222205368	99.7397	215117864	96.6	0.0148599	196.8	40.1	7.14377	0.985814	0.967733	0.000368093	3155631	2938945	96265	120421	2.20154	1.46766	152	66	41	9208	3136115	11064	33	102	46
00114051073M16BFF2	A	CentralChina	Hunan	Han	Xiang	Female	227682766	22760.2	98.14	96.97	91.8	89.03	41.18	227303498	99.8334	221344208	97.2	0.0152348	213.5	42.6	7.30985	0.986629	0.973	2.20437e-08	3158397	2939226	96758	122413	2.20174	1.48324	146	84	43	9475	3138375	7201	41	105	47
00114051107M17BFF2	A	SouthChina	Guangdong	Han	Cantonese	Female	215848686	21576.4	98.09	96.79	91.61	88.32	40.99	215015756	99.6141	209995486	97.3	0.0147664	214.6	42.1	6.9124	0.986251	0.983274	0.000127118	3139891	2924306	95774	119811	2.19857	1.41522	144	72	39	9283	3120455	8155	36	108	52
00114051113M23BFF2	A	SouthChina	Guangdong	Han	Cantonese	Female	214746652	21466.2	98.27	97.48	92.12	90.17	41.12	214084812	99.6918	207857770	96.8	0.0167731	200.2	39	6.8857	0.986024	0.995552	0.000555627	3160638	2941892	96709	122037	2.20007	1.45781	174	75	48	9292	3140978	5003	41	104	49
00114051121M24BFF2	A	SouthChina	Guangdong	Han	Cantonese	Female	237958596	23783	97.82	97.8	91.6	90.99	40.86	237432908	99.7791	232111216	97.5	0.0247763	228.4	46.3	7.63194	0.987784	1.00077	0.000252328	3172288	2951895	97474	122919	2.20017	1.51779	152	81	51	9433	3152539	5412	38	94	35
00114051187M16BFF2	A	CentralChina	Hubei	Han	Mandarin	Female	221411858	22129.5	98.27	97.35	92.39	90.13	40.99	220997384	99.8128	214050568	96.7	0.0174713	189.8	38.1	7.1053	0.985997	0.968299	0.000349068	3150679	2933010	96483	121186	2.19865	1.47412	156	68	44	9300	3131110	7568	39	111	45
00114051198M26BFF2	A	SouthChina	Guangdong	Han	Cantonese	Female	225044634	22495.5	97.89	97.69	91.77	90.66	41.4	224554701	99.7823	219385052	97.5	0.0235454	229.4	45.7	7.21687	0.987025	0.982227	0.00128855	3177438	2957748	97347	122343	2.20098	1.48455	158	82	43	9455	3157565	5375	48	101	49
00114051266M23BFF2	A	SouthChina	Guangdong	Han	Cantonese	Female	211446584	21132.6	98.19	97.18	91.82	89.18	41.41	211032386	99.8041	206061016	97.5	0.0177443	228.1	46.5	6.78506	0.986639	0.980884	0.00360815	3144349	2926890	96403	121056	2.19951	1.46145	165	84	50	9249	3124668	5804	37	115	40
00114051269M19BFF2	A	SouthChina	Guangdong	Han	Min	Female	177837618	17770.2	97.9	97.2	91.47	89.48	41.03	176863165	99.4521	172191368	96.8	0.0128038	201.3	40	5.68055	0.981515	0.997525	0.00280567	3136815	2922378	95104	119333	2.20349	1.46758	136	80	41	9150	3117356	3985	37	106	47
00114051275F00BFF2	A	SouthChina	Guangdong	Han	Cantonese	Male	232404896	23229.2	98.52	97.42	93.1	90.27	41.45	231810564	99.7443	226378632	97.4	0.00836717	214.1	40.1	7.44919	0.991811	0.500682	2.45724e-07	3133451	2914864	96724	121863	2.20101	1.4759	166	80	45	9151	3114054	5936	41	123	45
00114051275M16BFF2	A	SouthChina	Guangdong	Han	Cantonese	Female	211816946	21171.5	98.25	97.35	92.34	90.1	41.54	210934495	99.5834	204400894	96.5	0.0163205	191.4	37.4	6.78152	0.984864	0.962115	1.6135e-07	3155320	2937088	96411	121821	2.19907	1.45587	168	82	45	9505	3135285	5440	31	114	56
00114051326M23BFF2	A	SouthChina	Guangdong	Han	Mandarin	Female	229091082	22898.1	97.8	97.59	91.47	90.33	41.03	228731327	99.843	223880030	97.7	0.0227989	238.2	48.5	7.35279	0.987179	0.984331	0.000568353	3170573	2950022	97629	122922	2.19712	1.50494	155	90	42	9367	3150732	5275	39	112	52
00114051328M17BFF2	A	SouthChina	Guangdong	Han	Hakka	Female	213988240	21388.1	98.02	97.56	91.94	90.45	41.36	213340445	99.6973	205990154	96.3	0.0138018	187.6	37.1	6.8574	0.985266	0.979926	0.000598861	3133312	2917470	95843	119999	2.20167	1.46674	148	78	38	9233	3113783	5519	33	109	49
00114051362M27BFF2	A	SouthChina	Guangdong	Han	Cantonese	Female	185198496	18508.5	97.95	97.69	91.95	90.68	41.08	184640839	99.6989	180583614	97.5	0.0216337	230.5	46.6	5.93597	0.983801	0.976037	0.0055366	3135779	2920810	95552	119417	2.199	1.49634	167	72	40	9398	3116024	5813	38	100	50
00114051385M24BFF2	A	SouthChina	Guangdong	Han	Cantonese	Female	206496122	20637.9	97.78	97.46	91.41	90	41.08	206190979	99.8522	201749260	97.7	0.0219747	240.4	50.3	6.62619	0.986447	0.987507	0.000356561	3154688	2937953	96095	120640	2.19948	1.48688	156	81	43	9325	3135021	4734	40	102	43
00114061004M16BFF2	A	SouthChina	Guangdong	Han	Cantonese	Female	207030210	20692.6	98.23	97.31	92.21	89.94	41.27	205263016	99.1464	198798390	96	0.0162955	194.2	36.7	6.60029	0.985011	0.997558	2.76814e-08	3134075	2919054	95342	119679	2.20377	1.44188	144	69	42	9191	3114746	4791	36	112	44
00114061020M24BFF2	A	CentralChina	Hubei	Han	Mandarin	Female	208606140	20849.5	98.41	97.62	92.51	90.38	41.05	208246311	99.8275	203731930	97.7	0.0256863	234.8	47.2	6.69714	0.986526	0.994511	1.08397e-08	3158682	2940565	96784	121333	2.19888	1.48768	158	79	44	9479	3138674	6205	41	113	44
00114061053M19BFF2	A	SouthChina	Guangdong	Han	Cantonese	Female	216371554	21621.6	97.16	97.12	89.75	88.47	41.07	214495928	99.1331	211452476	97.7	0.0252924	219.5	41.9	6.88053	0.985741	1.00764	0.000304094	3144374	2928158	95979	120237	2.19927	1.47246	150	73	40	9147	3124969	6492	32	102	44
00114061056M17BFF2	A	EastChina	Zhejiang	Han	Wu	Female	199004938	19888.2	97.97	97.57	91.75	90.35	41.11	197986169	99.4881	192522192	96.7	0.0157098	195.9	36	6.36303	0.983969	1.00011	0.000257742	3146192	2930256	95819	120117	2.19844	1.48286	168	69	38	9313	3126558	5745	39	106	49
00114061092M15BFF2	A	CentralChina	Hubei	Han	Mandarin	Female	198362396	19828.4	98.26	97.45	92.08	90.03	41.15	197842144	99.7377	192555098	97.1	0.0159925	207.9	39.4	6.36275	0.984749	0.971955	0.000668532	3149659	2932698	96151	120810	2.19999	1.47463	146	67	48	9264	3130295	6449	33	111	39
00114061104M18BFF2	A	SouthChina	Guangdong	Han	Mandarin	Female	194700884	19463	98.24	97.27	91.98	89.51	41.06	194172188	99.7285	188579816	96.9	0.0166622	211.6	41.4	6.24403	0.984595	0.971014	0.00052112	3124168	2910010	95205	118953	2.20064	1.44485	166	64	48	9401	3104504	4607	36	108	45
00114061192F00BFF2	A	SouthChina	Guangxi	Han	Mandarin	Male	281036590	28080.8	98.48	97.44	93.06	90.4	40.92	280587089	99.8401	272461106	96.9	0.0218397	189.9	37.3	9.00856	0.994618	0.514597	0.000182652	3157030	2935843	97455	123732	2.1972	1.50112	169	78	46	9452	3137181	6406	36	116	45
00114061192M19BFF2	A	CentralChina	Hubei	Han	Mandarin	Female	212887878	21280.8	98.08	97.27	91.61	89.41	41.06	212291795	99.72	207484272	97.5	0.0122867	212.8	41.2	6.82423	0.986167	0.985542	1.01312e-08	3148875	2931053	96310	121512	2.20001	1.46205	165	83	46	9306	3129261	7106	37	110	40
00114061225M23BFF2	A	SouthChina	Guangdong	Han	Cantonese	Female	254773920	25463.4	98.44	97.75	92.67	90.78	41.13	253694919	99.5765	248228412	97.4	0.0300975	229	45.4	8.15863	0.98829	0.985824	2.32694e-07	3189142	2966891	97974	124277	2.20286	1.52266	169	77	46	9419	3169355	5920	35	101	43
00114061258M26BFF2	A	SouthChina	Guangdong	Han	Hakka	Female	223445654	22333.4	97.57	97.34	90.87	89.82	41.25	223019103	99.8091	218513538	97.8	0.0163415	230.4	47.2	7.16435	0.987166	0.998379	2.62564e-08	3148861	2930800	96649	121412	2.19866	1.45258	162	80	42	9232	3129252	5304	42	103	45
00114061307M16BFF2	A	EastChina	Jiangxi	Han	Mandarin	Female	251387654	25118.4	98.35	97.77	92.54	91.07	40.89	250344455	99.585	244125562	97.1	0.0195862	210.5	42.2	8.04605	0.987911	1.00028	2.95076e-05	3165179	2944028	97824	123327	2.20158	1.48611	153	82	46	9312	3145450	6157	44	110	55
00114061316F00BFF2	A	SouthChina	Guangdong	Han	Unknown	Male	208040854	20791.1	98.28	98.39	94.1	93.97	40.78	207395794	99.6899	201636112	96.9	0.0267257	230.8	49.5	6.65867	0.991517	0.509736	2.92928e-07	3124324	2907889	96194	120241	2.20261	1.4907	152	74	38	9273	3104871	5578	42	111	52
00114071008M23BFF2	A	SouthChina	Guangdong	Han	Cantonese	Female	236969210	23686.7	98.35	97.53	92.31	90.16	41.13	236520709	99.8107	231412456	97.7	0.0250126	234.4	47.5	7.60713	0.98797	0.982941	0.000899924	3177826	2956013	98005	123808	2.19983	1.50491	163	84	46	9488	3157879	5124	40	106	41
00114071065M17BFF2	A	SouthChina	Guangdong	Han	Cantonese	Female	196211224	19605.3	97.8	97.3	91.12	89.72	40.84	195119729	99.4437	191884348	97.8	0.0215701	217.4	41.4	6.27367	0.984367	1.00278	6.01643e-08	3158176	2941191	96364	120621	2.20017	1.49578	156	69	46	9369	3138544	4628	36	101	42
00114071071M18BFF2	A	SouthChina	Guangdong	Han	Hakka	Female	186334238	18623	97.92	97.8	91.88	90.99	41.49	185472499	99.5375	181278004	97.3	0.022945	229.7	45.5	5.96178	0.983666	0.990009	0.000206459	3120855	2907452	94801	118602	2.20186	1.44305	154	79	45	9160	3101635	3871	33	110	47
00114071080F00BFF2	A	EastChina	Jiangxi	Han	Unknown	Male	190330110	19017	97.91	96.1	90.67	86.51	41.16	190011609	99.8327	186135744	97.8	0.0310602	215.1	45.1	6.10064	0.987826	0.514399	7.88776e-05	3105077	2890058	95202	119817	2.19911	1.47862	168	79	42	9168	3085627	7814	36	118	51
00114071080M16BFF2	A	EastChina	Jiangxi	Han	Gan	Female	178050092	17799.7	98.44	98.12	93.2	91.79	40.62	177819896	99.8707	174465556	98	0.0149939	203.4	36.8	5.71515	0.980213	0.973824	0.00199154	3128327	2911406	96073	120848	2.20181	1.44985	162	70	36	9211	3108913	4874	37	113	44
00114071147F26BFF2	A	SouthChina	Guangdong	Han	Mandarin	Male	218100486	21800.1	98.12	96.86	91.93	88.59	40.92	217785851	99.8557	211299402	96.9	0.0232672	215.7	39.9	6.99996	0.992037	0.50898	0.000466481	3125800	2910764	95351	119685	2.19914	1.47313	161	77	37	9235	3106231	11175	34	95	48
00114071147M18BFF2	A	CentralChina	Henan	Han	Mandarin	Female	213799292	21369.2	97.91	98	91.92	91.56	41.11	213266214	99.7507	208465156	97.5	0.0239224	223.4	43.9	6.85378	0.986708	0.988001	0.000508117	3151374	2935204	95864	120306	2.20351	1.48409	159	79	37	9317	3131707	12974	37	119	54
00114071163M16BFF2	A	SouthChina	Guangdong	Han	Hakka	Female	175065312	17497.3	98.09	95.39	91.17	84.69	40.73	174221171	99.5178	170947268	97.6	0.0125739	249.2	52.2	5.60028	0.98268	1.00472	0.000663783	3126499	2911480	95500	119519	2.20018	1.44801	160	78	41	9201	3107116	4430	39	101	49
00114071177M17BFF2	A	SouthChina	Guangdong	Han	Cantonese	Female	203335426	20326.7	98.5	98.23	93.47	92.2	40.68	202946457	99.8087	199032394	97.9	0.0153094	195	34.6	6.52254	0.983286	0.963066	0.000592257	3156634	2938849	96772	121013	2.1998	1.47865	141	84	42	9273	3137063	4718	38	107	45
00114071185F00BFF2	A	SouthChina	Guangdong	Han	Cantonese	Male	256363714	25623.9	98.49	97.35	92.86	90.02	40.83	256023666	99.8674	248770582	97	0.0220518	204.7	38	8.22799	0.993881	0.515943	1.1255e-07	3141262	2920608	97260	123394	2.20064	1.46057	152	86	46	9278	3121655	5591	35	121	42
00114071185M24BFF2	A	SouthChina	Guangdong	Han	Cantonese	Female	219864068	21966.1	97.84	97.7	91.85	91.08	41.55	218958156	99.588	213818158	97.3	0.0178255	208.6	41	7.03118	0.986469	0.963848	2.05337e-09	3169411	2948431	97560	123420	2.19743	1.49205	177	80	49	9416	3149604	5189	33	96	50
00114071244F00BFF2	A	SouthwestChina	Sichuan	Han	Unknown	Male	173850682	17373.6	97.95	96.37	90.87	87.2	41.56	173569599	99.8383	169848790	97.7	0.0297971	212.3	42.7	5.57455	0.983469	0.501754	3.58388e-09	3125206	2909206	95758	120242	2.19895	1.52718	169	77	46	9181	3105792	7891	38	106	42
00114071244M17BFF2	A	SouthChina	Guangdong	Han	Cantonese	Female	220355628	22021.8	98.53	97.9	92.97	91.28	41.14	219416126	99.5736	214556828	97.4	0.0243384	222.7	45.1	7.05438	0.986925	1.00727	0.000692868	3178111	2956540	97804	123767	2.19864	1.48622	162	78	53	9366	3158338	4991	33	114	45
00114071254M19BFF2	A	SouthChina	Guangdong	Han	Min	Female	201801786	20171.3	98.44	98	92.91	91.46	40.73	201513538	99.8572	197397772	97.8	0.0171819	194	34.9	6.47884	0.983975	0.980053	0.000619404	3138976	2922500	95758	120718	2.2028	1.45842	145	80	42	9086	3119733	4918	32	111	46
00114071270M23BFF2	A	SouthChina	Guangdong	Han	Hakka	Female	218279732	21820.1	98.69	98.09	93.35	91.83	40.86	217856192	99.806	213722668	97.9	0.0204828	198.4	35.6	7.00625	0.985943	0.96472	0.00108477	3154722	2935966	96538	122218	2.20092	1.48121	133	83	45	9148	3135331	5160	31	106	43
00114071271F00BFF2	A	SouthChina	Guangdong	Han	Cantonese	Male	211707220	21159.5	98.35	96.7	92.32	88.5	40.81	211416609	99.8627	202327418	95.6	0.01991	221.9	47.1	6.79179	0.992053	0.514583	0.000901177	3121244	2903405	96379	121460	2.19946	1.47956	151	76	43	9123	3102038	6923	37	104	50
00114071271M17BFF2	A	SouthChina	Guangdong	Han	Cantonese	Female	307447084	30736	98.47	98.14	93.3	91.88	40.7	307088734	99.8834	301166768	98	0.0170939	201.7	36.4	9.86365	0.988541	0.986439	5.4517e-09	3174373	2949930	98678	125765	2.19941	1.4924	159	86	42	9390	3154646	6259	41	97	47
00114071277M24BFF2	A	NorthChina	Shanxi	Han	Mandarin	Female	331382744	33126.3	98.41	97.35	92.44	89.37	40.82	330982181	99.8791	320220050	96.6	0.016446	205.6	48.5	10.6364	0.988737	0.984471	9.55544e-05	3184039	2959005	99152	125882	2.19995	1.46328	160	81	48	9550	3164106	8353	42	111	49
00114071283M19BFF2	A	SouthChina	Guangdong	Han	Cantonese	Female	195017914	19487.7	98.03	97	91.85	89.11	41.98	194367902	99.6667	189731160	97.3	0.0321702	214.1	41.2	6.24439	0.983417	0.965523	0.00154093	3138019	2922117	95672	120230	2.20249	1.49337	157	80	40	9218	3118404	5042	39	114	54
00114071289M24BFF2	A	SouthChina	Guangdong	Han	Cantonese	Female	202673912	20257.7	98.73	98.35	93.62	92.76	41.02	202315672	99.8232	198114438	97.8	0.0216169	188.8	33.5	6.50592	0.984128	0.971674	1.77374e-08	3150453	2933196	96314	120943	2.20034	1.48448	150	87	45	9424	3130627	6120	40	109	48
00114071291M19BFF2	A	NortheastChina	Heilongjiang	Han	Mandarin	Female	196073014	19599.7	98.54	97.91	92.83	91.1	40.71	195670828	99.7949	192382916	98.1	0.0139332	195.1	34.9	6.29157	0.982916	0.988475	3.04534e-07	3144768	2928011	96168	120589	2.19909	1.47882	155	80	40	9273	3125200	6997	39	99	46
00114071297M17BFF2	A	SouthChina	Guangdong	Han	Cantonese	Female	202378848	20229.2	98.53	98.19	93.5	92.02	40.53	202157241	99.8905	198448302	98.1	0.0142574	197.5	35.9	6.49663	0.983926	0.994035	2.78328e-07	3139112	2922466	95950	120696	2.19842	1.46537	151	81	45	9347	3119608	4903	39	116	47
00114071304M16BFF2	A	EastChina	Jiangxi	Han	Mandarin	Female	191554234	19149.6	98.47	98.17	93.35	92.01	40.64	191174074	99.8015	187382132	97.8	0.0165896	198.6	35.9	6.14577	0.982245	0.991832	3.77993e-08	3142836	2926260	96037	120539	2.20019	1.4746	164	75	45	9114	3123525	5443	43	115	58
00114071315M25BFF2	A	SouthChina	Guangdong	Han	Cantonese	Female	191503504	19139.4	98.59	98.06	93.36	91.61	40.8	191276137	99.8813	187886762	98.1	0.0202353	180.7	32.1	6.149	0.9811	0.980095	6.90655e-08	3133945	2918715	95176	120054	2.20059	1.44156	160	77	45	9219	3114430	5248	36	116	43
00114071319M25BFF2	A	CentralChina	Hunan	Han	Mandarin	Female	201036752	20096.2	98.21	97.25	92.14	89.37	40.76	200644018	99.8046	196088032	97.5	0.0205293	209.8	42	6.45163	0.984779	0.970243	1.50523e-07	3150286	2933070	96224	120992	2.20082	1.45361	171	73	47	9339	3130618	5657	43	116	52
00114071323M27BFF2	A	SouthChina	Guangdong	Han	Cantonese	Female	170911184	17081.9	97.9	96.86	91.4	88.62	41.3	170670247	99.859	167202316	97.8	0.0116855	242.1	51	5.48596	0.982107	0.960827	0.000413235	3117997	2904412	94998	118587	2.20315	1.43725	158	83	45	9003	3098738	4033	43	122	48
00114071325M25BFF2	A	SouthChina	Guangdong	Han	Hakka	Female	203733822	20361.7	98.25	97.04	92.13	89.04	42.26	203026617	99.6529	197844740	97.1	0.0308116	220	41.6	6.52716	0.984355	0.951027	0.000610399	3153189	2935698	96778	120713	2.2003	1.47208	150	82	42	9398	3133378	5451	37	112	46
00114071326F00BFF2	A	SouthChina	Guangdong	Han	Unknown	Male	221424206	22134.2	98.3	96.61	92.1	88.12	40.91	221194615	99.8963	213179214	96.3	0.0178539	222.2	42	7.10952	0.993124	0.510626	0.000637976	3132502	2913510	96707	122285	2.20109	1.49555	152	90	48	9291	3112922	5429	43	110	52
00114071326M18BFF2	A	SouthChina	Guangdong	Han	Min	Female	214869788	21480.8	98.53	98.25	93.5	92.19	40.4	214620016	99.8838	210534332	98	0.0164297	197.1	35	6.89854	0.984517	0.982993	4.47613e-08	3169102	2948121	97615	123366	2.19839	1.49546	149	71	48	9438	3149292	4960	43	110	49
00114071331F00BFF2	A	SouthChina	Guangdong	Han	Cantonese	Male	232250438	23216.4	98.38	96.93	92.46	88.84	40.89	231918302	99.857	224280466	96.6	0.0209658	209.1	38.6	7.45473	0.993092	0.507551	5.3427e-05	3151222	2930547	97534	123141	2.19922	1.47305	169	81	48	9530	3131199	4564	36	111	44
00114071331M18BFF2	A	SouthChina	Guangdong	Han	Cantonese	Female	209849142	20978.1	98.46	97.67	92.51	90.27	40.8	209636868	99.8988	205989946	98.2	0.0162001	203.9	36.9	6.73951	0.984878	0.975877	8.94407e-05	3171062	2949340	97961	123761	2.19695	1.48961	165	80	44	9222	3151577	4979	40	109	51
00114081001F00BFF2	A	CentralChina	Hubei	Han	Unknown	Male	179614266	17940.5	98.26	96.51	92.08	87.8	41.72	179144342	99.7384	174146080	97	0.0321774	202.4	44	5.74494	0.982364	0.503414	0.00105086	3105005	2890859	94797	119349	2.20139	1.48391	164	74	46	9218	3085577	8413	36	102	45
00114081001M17BFF2	A	SouthChina	Guangdong	Han	Hakka	Female	201278756	20120.7	98.47	97.83	92.62	90.77	40.86	200904983	99.8143	197349168	98	0.0150988	197	35.4	6.45971	0.983809	0.991991	0.000344922	3153369	2934844	96762	121763	2.20017	1.46679	152	81	49	9395	3133701	5456	44	108	51
00114081004M16BFF2	A	SouthChina	Guangdong	Han	Mandarin	Female	178902104	17884.4	98.49	97.91	92.63	91	40.75	178750622	99.9153	175749268	98.2	0.0147635	200.3	36.1	5.74842	0.981158	0.991965	1.70586e-07	3140923	2925255	95757	119911	2.20004	1.48207	163	78	38	9250	3121440	5054	38	111	49
00114081007M17BFF2	A	CentralChina	Henan	Han	Mandarin	Female	204242094	20405.8	97.97	96.79	91.65	88.57	42.62	203674060	99.7219	196867820	96.4	0.0332325	216.4	43.1	6.53968	0.984536	0.940224	0.000907415	3162315	2944109	96978	121228	2.2015	1.47674	164	80	45	9516	3142485	9079	36	120	46
00114081013M23BFF2	A	CentralChina	Hunan	Han	Xiang	Female	190928948	19086.6	98.4	98.2	92.7	92.05	41.06	190708434	99.8845	186936420	97.9	0.0165991	195.9	34.9	6.1337	0.983316	0.971909	4.2745e-07	3146590	2929953	96067	120570	2.19928	1.48529	165	81	43	9205	3127163	5856	46	104	46
00114081020M17BFF2	A	SouthChina	Guangxi	Han	Cantonese	Female	198796772	19872	98.48	97.91	92.68	91.03	40.77	198560966	99.8814	194956276	98.1	0.0168084	196.2	35.5	6.38527	0.983785	0.982962	0.000395382	3151657	2933923	96449	121285	2.19834	1.45397	147	85	47	9208	3132337	5232	37	111	42
00114081023M17BFF2	A	SouthChina	Guangdong	Han	Hakka	Female	209044026	20896.9	98.55	98.02	93.01	91.5	40.84	208680325	99.826	204029028	97.6	0.0165755	183.2	32	6.7096	0.983856	0.996304	0.000387596	3152117	2934557	95995	121565	2.19827	1.48346	151	76	41	9248	3132634	7161	38	102	48
00114081025M26BFF2	A	SouthChina	Guangdong	Han	Cantonese	Female	172015316	17194.6	98.04	97.24	91.44	89.67	40.59	171657259	99.7918	166899184	97	0.0145177	198.9	40.4	5.51627	0.979397	0.995369	1.2112e-06	3108663	2898426	93710	116527	2.20147	1.4375	145	67	37	9054	3089534	5704	41	94	43
00114081033F00BFF2	A	SouthChina	Guangdong	Han	Cantonese	Male	201018910	20095.3	98.33	96.59	92.2	88	40.7	200762103	99.8722	194313414	96.7	0.0191538	219.2	44.5	6.45399	0.990337	0.518628	0.00032518	3124686	2907345	96225	121116	2.19903	1.49915	163	74	36	9251	3105224	3996	38	105	43
00114081033M22BFF2	A	SouthChina	Guangdong	Han	Cantonese	Female	229902124	22976.8	98.43	98.32	92.9	92.5	40.58	229616803	99.8759	224809326	97.8	0.0201554	188	33.9	7.38159	0.986612	0.984118	0.00277491	3175486	2953190	98233	124063	2.19844	1.48982	154	86	41	9379	3155767	5869	42	111	46
00114081037M20BFF2	A	SouthChina	Guangdong	Han	Cantonese	Female	194517416	19444.5	98.43	97.98	92.88	91.43	41.12	194158069	99.8153	190348942	97.9	0.0166239	195	35.1	6.24314	0.983336	0.985704	0.00112932	3141462	2925879	95642	119941	2.20202	1.47709	156	71	42	9271	3121960	4929	37	113	43
00114081043M26BFF2	A	SouthChina	Guangdong	Han	Cantonese	Female	247115058	24703.1	98.06	97.51	91.53	90.32	41	246630091	99.8037	242259626	98	0.0159724	199	35.6	7.93004	0.98696	0.995078	2.09764e-08	3165015	2945433	97098	122484	2.19827	1.47415	145	73	38	9371	3145390	5602	36	114	36
00114081047M26BFF2	A	SouthwestChina	Sichuan	Han	Mandarin	Female	194426656	19434.9	98	97.57	92.05	90.5	40.8	194125871	99.8453	190902806	98.2	0.0139003	197	35.5	6.23984	0.983339	0.999243	0.00250963	3135641	2919686	95748	120207	2.19719	1.47497	155	76	43	9151	3116295	6091	42	106	46
00114081058F00BFF2	A	EastChina	Jiangxi	Han	Unknown	Male	239136788	23899.9	98.52	97.34	92.97	90.25	40.78	238847048	99.8788	230453264	96.4	0.0211738	206.3	38.5	7.67481	0.993963	0.51137	1.23385e-07	3282950	3054710	100321	127919	2.19761	1.88772	157	89	46	9826	3262470	11551	36	119	53
00114081058M18BFF2	A	SouthwestChina	Sichuan	Han	Mandarin	Female	198688728	19863.6	98.45	97.99	92.93	91.42	41.02	198414782	99.8621	194161220	97.7	0.0155438	192.3	33.5	6.3834	0.98385	0.982873	0.0003675	3303634	3075198	100461	127975	2.20122	1.78104	161	88	49	9876	3282838	6459	40	106	54
00114081063M24BFF2	A	SouthChina	Guangdong	Han	Cantonese	Female	167692920	16762.8	98.29	97.72	92.6	90.75	40.89	167423625	99.8394	164225000	97.9	0.0232417	194.3	34.7	5.38203	0.978678	0.975078	0.000701359	3118040	2904524	94729	118787	2.2017	1.45975	159	66	41	9291	3098547	3832	45	103	48
00114081073M26BFF2	A	SouthChina	Guangdong	Han	Hakka	Female	191457640	19133.2	98.11	96.93	91.69	88.75	40.87	190953091	99.7365	186511474	97.4	0.015057	218.7	43.9	6.13588	0.984601	0.994541	2.76904e-08	3146418	2929617	96202	120599	2.20129	1.47293	156	66	42	9211	3126930	4359	42	98	47
00114081076M18BFF2	A	SouthwestChina	Sichuan	Han	Mandarin	Female	200541232	20047.3	98.49	97.82	92.63	90.74	40.5	200164560	99.8122	196521476	98	0.015261	200.6	36.4	6.43633	0.983652	0.99262	6.11545e-07	3145863	2928661	96010	121192	2.19836	1.48364	149	80	40	9300	3126309	6329	41	96	48
00114081081M21BFF2	A	SouthChina	Guangdong	Han	Cantonese	Female	228118220	22804.3	98.41	98.17	92.75	91.95	41.2	227890076	99.9	223185724	97.8	0.0198599	194	34.3	7.32777	0.986325	0.983476	8.77134e-05	3151631	2933608	96482	121541	2.19785	1.45492	149	92	44	9390	3132003	5750	34	117	58
00114081092M25BFF2	A	SouthChina	Guangdong	Han	Mandarin	Female	184086336	18400.8	98.17	97.72	91.66	90.4	40.82	183792768	99.8405	180679162	98.1	0.0158669	197.2	35.4	5.90792	0.982172	0.989622	0.00156945	3120768	2906685	94776	119307	2.20342	1.43049	157	68	43	9050	3101509	5714	39	112	46
00114081096M16BFF2	A	SouthChina	Guangdong	Han	Hakka	Female	214074114	21396.6	98.54	98.28	93.31	92.41	40.58	213758223	99.8524	209345850	97.8	0.017178	183.4	32.6	6.87425	0.984656	0.963002	0.000645238	3147619	2929923	96308	121388	2.19745	1.44871	148	77	42	9372	3128142	5986	44	105	46
00114081117M21BFF2	A	SouthChina	Guangdong	Han	Cantonese	Female	306639286	30652.5	98.47	97.83	92.67	90.51	40.69	306266469	99.8784	300424626	98	0.0176493	198	35.6	9.84317	0.987838	0.993232	0.00065335	3203270	2978084	99133	126053	2.19729	1.53853	159	82	42	9540	3183353	8254	43	119	51
00114081121M26BFF2	A	NortheastChina	Liaoning	Han	Mandarin	Female	211040608	21095	98.02	97.51	91.53	90.45	41.56	210409512	99.701	205949274	97.6	0.0182958	191.8	33.6	6.76481	0.98454	0.98748	0.000255808	3164394	2946211	96880	121303	2.1984	1.47762	169	86	42	9487	3144412	8306	39	108	41
00114081126M27BFF2	A	CentralChina	Hubei	Han	Mandarin	Female	229572536	22949	98.06	97.28	91.47	89.66	40.63	229216074	99.8447	224876458	98	0.0148491	201.8	36.7	7.36997	0.985983	0.986254	0.00112917	3142792	2924583	96300	121909	2.20027	1.46191	146	67	46	9343	3123163	6901	35	117	41
00114081135M17BFF2	A	CentralChina	Hubei	Han	Mandarin	Female	163937808	16382.9	98.14	97.42	91.93	90.15	40.89	162901619	99.3679	159029436	97	0.0193035	220.6	44.8	5.2375	0.980237	0.997969	0.00375431	3120487	2906478	95071	118938	2.19928	1.46367	145	77	44	9354	3100872	5248	40	104	42
00114081138M23BFF2	A	SouthChina	Guangdong	Han	Cantonese	Female	175732284	17566.9	98.32	97.25	91.9	89.14	40.94	175453551	99.8414	172585694	98.2	0.015694	204.1	37	5.64128	0.981146	0.978358	0.000967432	3121121	2907085	94992	119044	2.20345	1.43892	159	78	41	9189	3101684	4462	37	118	43
00114081139M19BFF2	A	EastChina	Zhejiang	Han	Mandarin	Female	183051190	18299	98.45	98.06	92.93	91.66	40.87	182842734	99.8861	179038970	97.8	0.0166885	192.9	34.2	5.88039	0.98211	0.994858	0.00058659	3140299	2924524	95716	120059	2.19938	1.47654	145	89	44	9318	3120752	5541	40	122	44
00114081143F00BFF2	A	SouthChina	Guangdong	Han	Unknown	Male	219853820	21975.2	98.44	97.15	92.67	89.67	40.64	219583957	99.8773	211272984	96.1	0.0200824	210	39.1	7.05552	0.992958	0.518236	1.28358e-07	3123190	2906524	96220	120446	2.19784	1.50444	149	90	43	9292	3103778	8588	35	100	44
00114081148M19BFF2	A	SouthChina	Guangdong	Han	Cantonese	Female	217598570	21747	97.65	97.4	91.18	90.05	41.6	217096099	99.7691	212251650	97.5	0.0158564	221.9	43.3	6.97457	0.986551	0.965042	0.000244932	3175493	2955003	97730	122760	2.19943	1.46718	162	91	46	9397	3155634	5254	47	114	51
00114081151F00BFF2	A	SouthChina	Guangdong	Han	Cantonese	Male	188377284	18831.6	97.82	95	91.24	86.08	41.03	188073028	99.8385	183104734	97.2	0.0114855	215.4	40.3	6.0438	0.988444	0.509939	5.91491e-07	3108352	2893741	95242	119369	2.20157	1.46807	160	82	48	9087	3089083	4375	40	105	48
00114081151M17BFF2	A	SouthChina	Guangdong	Han	Cantonese	Female	185490652	18542.2	98.38	97.84	92.6	90.89	40.8	185022423	99.7476	181431474	97.8	0.0162018	203.4	37	5.94973	0.982822	0.979723	0.00187923	3155024	2936876	96447	121701	2.20134	1.47743	151	88	46	9274	3135502	4739	34	110	49
00114081156M21BFF2	A	SouthwestChina	Sichuan	Han	Mandarin	Female	178635234	17856.3	98.35	97.09	91.89	88.73	40.91	178275617	99.7987	173735498	97.3	0.0105268	197.4	40.1	5.73232	0.980334	0.994228	2.10735e-06	3132388	2917899	95491	118998	2.19875	1.4831	155	68	51	9299	3112885	5517	40	113	51
00114081160F00BFF2	A	SouthChina	Guangdong	Han	Cantonese	Male	193146324	19294	98.09	96.08	91.35	86.53	41.41	192835579	99.8391	187202968	96.9	0.0325698	216.6	46.1	6.19138	0.987846	0.500002	3.83672e-08	3199065	2978247	97756	123062	2.2044	1.61292	166	85	44	9738	3178633	8430	35	108	50
00114081160M18BFF2	A	SouthChina	Guangdong	Han	Cantonese	Female	161347838	16117.7	98.09	96.61	91.59	87.97	44.93	160639931	99.5613	154588234	95.8	0.0302166	227.2	46.8	5.15816	0.93784	0.89415	0.00020157	3414078	3181837	102714	129527	2.20095	2.22272	167	84	55	10034	3392906	9631	34	118	54
00114081170M17BFF2	A	EastChina	Jiangsu	Han	Mandarin	Female	192468530	19238.3	98.46	97.93	92.93	91.22	40.46	192113272	99.8154	188184572	97.8	0.0154591	193.6	37	6.17881	0.982888	0.983238	0.00049581	3141448	2925566	95529	120353	2.20197	1.46846	148	87	40	9235	3121961	6875	38	106	48
00114081178M17BFF2	A	SouthChina	Guangdong	Han	Cantonese	Female	173269722	17320	98.24	97.88	92.48	91.3	40.91	172946889	99.8137	169635426	97.9	0.0173346	195.1	34.6	5.5593	0.980394	0.992135	0.000173824	3107038	2894660	94294	118084	2.19834	1.43815	160	74	44	9129	3087851	4259	40	102	39
00114081179M16BFF2	A	SouthChina	Guangdong	Han	Cantonese	Female	197396796	19725.6	98.28	97.15	92.23	89.36	41.03	196875777	99.7361	192325322	97.4	0.0324406	219.8	43.9	6.3282	0.98471	0.982112	0.00116301	3146523	2929873	95873	120777	2.20055	1.48815	151	85	51	9261	3126767	5945	38	110	50
00114081180M22BFF2	A	SouthChina	Guangdong	Han	Mandarin	Female	170769048	17068.8	98.1	97.52	91.72	90.46	41.22	170448249	99.8121	166642210	97.6	0.0157798	192.9	34.9	5.47982	0.978691	0.972263	0.000619162	3114311	2900980	94777	118554	2.20206	1.4375	146	81	47	8990	3095179	4274	38	108	41
00114081185M23BFF2	A	SouthChina	Guangdong	Han	Mandarin	Female	196353316	19621.2	98.04	97.4	92.01	90.18	41.13	195871170	99.7544	191506624	97.5	0.0160257	225.8	46.9	6.29605	0.985218	0.966215	4.61326e-07	3154517	2936640	96281	121596	2.19631	1.46829	145	90	46	9358	3134652	4242	40	122	46
00114081191M26BFF2	A	CentralChina	Henan	Han	Mandarin	Female	235547224	23540.8	97.96	97.59	91.81	90.75	41.39	235359432	99.9203	229774486	97.5	0.0161575	217.7	44	7.56514	0.987569	0.982735	0.000216525	3175923	2954619	97852	123452	2.20043	1.48194	171	75	44	9482	3156102	8964	39	115	50
00114081192F00BFF2	A	SouthChina	Guangdong	Han	Unknown	Male	224633624	22455.5	98.31	96.54	92.06	87.68	40.83	224375362	99.885	218320352	97.2	0.0174011	224.3	42.1	7.21449	0.992559	0.509428	0.00015584	3131545	2912854	96912	121779	2.19661	1.48671	167	61	51	9405	3111773	4884	39	114	43
00114081192M22BFF2	A	SouthChina	Guangdong	Hui	Mandarin	Female	216828986	21675.7	98.59	97.96	92.97	91.39	40.64	216545885	99.8694	212352734	97.9	0.0203101	205.2	37.5	6.96475	0.986081	0.980883	6.41676e-08	3163023	2942467	97601	122955	2.19941	1.49555	160	79	47	9446	3143149	7797	35	113	45
00114081194M24BFF2	A	SouthChina	Guangdong	Han	Cantonese	Female	201794648	20169.8	97.93	96.46	91.25	87.66	40.73	201610006	99.9085	197039614	97.6	0.0153925	219.2	40.2	6.48205	0.985567	1.03519	0.000216033	3147370	2930043	96278	121049	2.20359	1.46388	155	74	42	9156	3128039	4642	38	96	49
00114081197M24BFF2	A	NorthChina	Neimenggu	Han	Mandarin	Female	190914846	19085	98.24	97.39	91.83	89.89	41.2	190577300	99.8232	187091466	98	0.0147573	201.9	36.1	6.12823	0.983715	0.987665	7.48312e-05	3143498	2927015	96118	120365	2.20239	1.47309	144	65	40	9390	3123796	6751	33	116	47
00114081198M21BFF2	A	SouthChina	Guangdong	Han	Cantonese	Female	227924114	22784.9	98.72	98.14	93.53	92.01	40.88	227580608	99.8493	222903120	97.8	0.0195475	193.9	34.4	7.31835	0.986746	0.979984	8.32242e-05	3167906	2948112	97201	122593	2.20184	1.46774	159	77	38	9358	3148198	5123	33	113	48
00114081208F00BFF2	A	SouthChina	Guangdong	Han	Cantonese	Male	207358472	20724.9	98.11	96.85	91.89	88.6	40.77	207097452	99.8741	200392662	96.6	0.0238844	214.9	40.4	6.65489	0.991487	0.512296	3.17561e-08	3123523	2906029	96168	121326	2.19802	1.48591	158	71	36	9187	3104009	5050	42	110	51
00114081208M18BFF2	A	SouthChina	Guangdong	Han	Cantonese	Female	178126478	17806.6	97.8	95.8	90.72	85.93	41.01	177974913	99.9149	172692882	96.9	0.0145733	230.5	43.2	5.72237	0.983294	0.991876	0.00196891	3150395	2932700	96375	121320	2.20234	1.47707	164	78	40	9340	3130692	6086	39	105	45
00114081211M17BFF2	A	CentralChina	Hunan	Yao	Xiang	Female	217232348	21713.8	98.23	97.88	92.46	91.22	40.87	216706520	99.7579	212677736	97.9	0.0179262	195.2	34.6	6.96867	0.985588	0.98421	0.000117608	3153829	2935813	96517	121499	2.20057	1.47278	164	74	39	9165	3134338	6800	34	106	45
00114081214M23BFF2	A	CentralChina	Henan	Han	Mandarin	Female	256907152	25683	98.14	97.07	91.9	88.86	41.03	256544622	99.8589	249620184	97.2	0.0232584	214.2	46.7	8.24906	0.987876	0.982075	8.65724e-09	3180275	2958833	97689	123753	2.19969	1.51154	169	79	49	9502	3160440	9862	34	101	48
00114081215M20BFF2	A	CentralChina	Hunan	Han	Mandarin	Female	212757958	21266.1	98.72	98.19	93.53	92.24	40.73	212336708	99.802	207848814	97.7	0.0205977	193.5	35.1	6.82732	0.985536	0.979766	0.000584603	3164095	2945130	96987	121978	2.20027	1.4701	153	73	41	9417	3144428	5977	44	104	51
00114081238M22BFF2	A	SouthChina	Guangdong	Han	Cantonese	Female	207712920	20764.7	98.19	97.66	92.13	90.49	40.58	207488651	99.892	203712732	98.1	0.0141497	200.9	36	6.67091	0.983909	1.00311	0.00168358	3155882	2938009	96503	121370	2.19623	1.48131	156	81	44	9437	3136245	5173	39	102	49
00114081239M26BFF2	A	SouthChina	Guangdong	Han	Min	Female	193755496	19368.9	98.16	97.12	91.53	89.17	41.47	193464552	99.8498	189394486	97.7	0.0154889	205.6	37.5	6.21996	0.983928	0.948425	0.00110617	3137136	2921376	95783	119977	2.2007	1.44372	139	75	43	9167	3117778	4928	36	101	44
00114081246M19BFF2	A	SouthChina	Guangdong	Han	Cantonese	Female	202054232	20197.7	96.93	96.49	89.91	87.42	41.14	201876200	99.9119	197276372	97.6	0.0112078	238.4	45.3	6.47475	0.98546	0.997765	8.60313e-05	3142142	2924903	96162	121077	2.20408	1.4477	147	68	37	9300	3122513	4565	30	112	46
00114081258F00BFF2	A	SouthChina	Guangdong	Han	Cantonese	Male	186980722	18690.3	98.27	96.49	91.95	87.58	41.03	186707866	99.8541	180411396	96.5	0.0186068	228.1	42.8	6.00048	0.988448	0.50252	0.000637855	3120571	2903710	96257	120604	2.19825	1.45821	146	84	48	9198	3101204	4576	34	104	44
00114081258M20BFF2	A	SouthChina	Guangdong	Han	Cantonese	Female	227040348	22695	98.41	98.21	92.78	92.14	40.9	226671788	99.8377	221937028	97.8	0.0187167	192.6	34.1	7.2878	0.98664	0.981421	0.000111212	3153870	2933956	97090	122824	2.20064	1.46665	165	81	45	9268	3134296	5022	34	103	45
00114081259M18BFF2	A	EastChina	Jiangxi	Han	Hakka	Female	210826676	21074	98.39	98.09	92.68	91.68	40.61	210531794	99.8601	206392412	97.9	0.0181039	194.8	35	6.76862	0.985259	0.962204	0.000714643	3149827	2932058	96404	121365	2.19793	1.47418	159	86	46	9380	3130078	6437	35	104	47
00114081267M19BFF2	A	EastChina	Fujian	Han	Unknown	Female	245198326	24510.4	98.52	97.92	92.91	90.84	40.63	244939586	99.8945	240595674	98.1	0.0160262	192.9	33.8	7.87484	0.985536	0.991838	0.00210137	3164896	2944961	97172	122763	2.20162	1.47225	147	76	39	9300	3145274	5636	43	111	46
00114081269F00BFF2	A	SouthChina	Guangdong	Han	Cantonese	Male	213606644	21337.1	98	96.11	91.06	86.28	41.78	213240649	99.8287	207569550	97.2	0.0390954	231	52.6	6.84456	0.988139	0.49987	0.00020113	3125439	2908260	96068	121111	2.20237	1.48428	161	82	50	9432	3105629	9018	35	102	39
00114081269M24BFF2	A	SouthChina	Guangdong	Han	Cantonese	Female	201074208	20102.5	98.05	97.43	91.38	89.96	40.97	200901927	99.9143	197285644	98.1	0.0119762	203.8	36.4	6.4575	0.984214	0.990618	0.00160908	3172537	2952486	97136	122915	2.20031	1.48998	160	84	45	9440	3152586	4973	45	108	53
00114081273F00BFF2	A	SouthChina	Guangdong	Han	Unknown	Male	182116688	18205	97.8	95.42	91.13	85.81	40.95	181775437	99.8126	176893164	97.1	0.00898223	218.5	40.8	5.8407	0.987261	0.510903	0.000326584	3099228	2885665	94564	118999	2.20195	1.46304	154	82	42	9306	3079778	5352	38	116	46
00114081273M26BFF2	A	CentralChina	Hubei	Han	Mandarin	Female	208013530	20792.4	97.45	97.03	90.02	89.31	40.66	207722424	99.8601	203981446	98.1	0.012352	194.9	35.1	6.67493	0.983461	0.989313	0.000215783	3160016	2940652	96997	122367	2.1992	1.48815	146	73	39	9164	3140701	6805	30	100	50
00114081274M17BFF2	A	EastChina	Jiangxi	Han	Mandarin	Female	185854840	18575.6	98.02	97.2	91.55	89.3	41.67	185707666	99.9208	176321636	94.9	0.0120912	210.7	41.6	5.96586	0.983156	0.974818	2.61556e-07	3128583	2913659	95613	119311	2.20193	1.43097	160	79	39	9238	3109135	10747	36	115	46
00114081276M24BFF2	A	SouthwestChina	Sichuan	Han	Mandarin	Female	217575590	21745.3	98.31	97.67	92.2	90.81	41.03	217164418	99.811	212583372	97.7	0.0167136	186.3	32.9	6.98086	0.985083	0.95646	7.57628e-07	3151081	2933372	96462	121247	2.20159	1.46731	151	81	40	9322	3131402	7051	37	109	47
00114081284M24BFF2	A	SouthChina	Guangdong	Han	Unknown	Female	219077578	21901.6	98.22	97.45	92.26	89.79	41.09	218781267	99.8647	214989176	98.1	0.0210187	206.4	36.8	7.03675	0.985873	0.978764	0.000143246	3155335	2937386	96703	121246	2.20316	1.4757	167	78	51	9475	3135535	5125	45	107	46
00114081285M25BFF2	A	SouthChina	Guangdong	Han	Cantonese	Female	234113714	23399.5	98.29	97.59	92.13	90.6	40.95	233635684	99.7958	228886226	97.8	0.0177525	190.2	33.8	7.51163	0.98625	0.958115	0.000500968	3163568	2944197	96726	122645	2.20218	1.47706	153	88	46	9323	3143931	5720	36	98	43
00114081286M18BFF2	A	SouthChina	Guangdong	Han	Mandarin	Female	221343734	22124.3	98.24	97.97	92.52	91.52	40.52	221057358	99.8706	216463940	97.8	0.0193413	190.7	34.1	7.10563	0.985624	0.978797	4.42743e-08	3175757	2955859	97205	122693	2.2014	1.53047	152	81	45	9237	3156161	6659	33	104	52
00114081289M18BFF2	A	SouthChina	Guangdong	Han	Hakka	Female	174953858	17489	98.21	97.92	92.36	91.36	41	174756677	99.8873	171203764	97.9	0.0176267	197.5	35.7	5.61911	0.981043	0.96972	0.000670946	3121134	2907577	94956	118601	2.19971	1.4451	163	70	47	9250	3101714	5007	37	102	51
00114081291M26BFF2	A	SouthChina	Guangdong	Han	Cantonese	Female	183611840	18353	98.17	96.97	91.47	88.69	40.7	183270510	99.8141	179724486	97.9	0.0157496	208.8	38.1	5.89311	0.982811	0.993873	0.000705637	3137496	2922295	95706	119495	2.20196	1.46425	171	86	44	9157	3118093	4595	42	101	52
00114081300M20BFF2	A	SouthChina	Guangdong	Han	Cantonese	Female	277718026	27752.8	98.3	97.91	92.62	91.49	40.59	277085078	99.7721	271613786	97.8	0.0136378	185	34.1	8.90525	0.987642	0.984246	4.11771e-08	3171137	2949957	97469	123711	2.1998	1.47565	146	79	45	9361	3151391	6410	34	113	40
00114081302M18BFF2	A	SouthChina	Guangxi	Han	Mandarin	Female	208322708	20824.1	98.22	97.93	92.42	91.32	40.8	171600887	82.3726	168456700	98.1	0.0187439	195	34.8	5.51493	0.980395	0.981156	0.00170263	3110903	2897954	94500	118449	2.20284	1.46072	143	69	49	9062	3091709	5468	37	128	45
00114081307M24BFF2	A	SouthChina	Guangdong	Han	Cantonese	Female	180366614	18030.6	97.55	96.6	90.2	88.1	40.74	180143914	99.8765	176784028	98	0.0102325	203.4	36.7	5.7858	0.980805	0.999517	0.00205951	3122506	2907835	95320	119351	2.20171	1.43592	150	65	43	9118	3103304	4546	33	101	47
00114081313M23BFF2	A	SouthChina	Guangdong	Han	Cantonese	Female	264155432	26395.6	98.09	97.74	92.26	91.23	41.24	263073869	99.5906	256715442	97.2	0.0155285	208.4	40.6	8.45603	0.988505	0.987544	0.00160266	3193986	2970232	98603	125151	2.20068	1.52341	164	86	50	9319	3174270	5367	36	107	47
00114088006M24BFF2	A	SouthChina	Guangdong	Han	Cantonese	Female	291081092	29100.3	98.63	97.95	93.13	90.92	40.36	290789994	99.9	283736872	97.5	0.0149103	200.6	38.1	9.35217	0.987784	0.994538	0.000649763	3175753	2952682	98340	124731	2.20074	1.48443	163	73	49	9478	3155923	5824	40	97	43
00114088009M20BFF2	A	SouthChina	Guangdong	Han	Min	Female	184803896	18473.9	98.21	97.79	92.36	90.9	40.84	184605694	99.8928	181151604	98	0.0168929	198.8	35.7	5.9334	0.982853	0.977973	0.000883366	3133105	2917615	95727	119763	2.20379	1.45289	139	74	46	9357	3113281	4057	36	101	47
00114088010M20BFF2	A	CentralChina	Hubei	Han	Mandarin	Female	202251506	20216.5	98.2	97.8	92.31	90.97	41.18	202052342	99.9015	198243272	98	0.0170625	200.4	36.7	6.49732	0.984868	0.974742	0.000643988	3145983	2928861	96203	120919	2.20019	1.47318	152	77	39	9322	3126349	6973	42	116	43
00114088011M27BFF2	A	SouthChina	Guangdong	Han	Min	Female	168831938	16864	98.43	97.57	92.24	90.05	42.58	168523927	99.8176	163847264	97	0.0413798	215.8	43.6	5.413	0.977753	0.944012	3.46541e-07	3119306	2905416	95140	118750	2.20289	1.43875	152	78	44	9310	3099674	6505	38	99	47
00114088012M20BFF2	A	SouthChina	Guangdong	Han	Min	Female	219586318	21949.5	98.4	98.15	92.73	91.91	40.97	219300040	99.8696	214964170	97.9	0.0199894	195.4	35	7.05097	0.985732	0.981571	1.66876e-07	3149092	2930972	96177	121943	2.20215	1.4672	150	82	42	9397	3129294	5065	39	106	45
00114091017M19BFF2	A	SouthChina	Guangdong	Han	Cantonese	Female	221234930	22116.5	98.35	98	92.49	91.41	40.75	220897176	99.8473	216622750	97.9	0.0170719	199.6	36	7.10408	0.986513	0.984065	0.00059814	3159383	2940329	96816	122238	2.19719	1.49997	150	74	46	9349	3139744	5208	37	112	45
00114091018M18BFF2	A	SouthChina	Guangdong	Han	Cantonese	Female	263020094	26293.1	98.27	97.75	92.37	90.77	40.8	262645802	99.8577	257551040	97.9	0.0128606	199.4	35.8	8.44497	0.987331	0.982158	4.75508e-07	3173364	2951726	97842	123796	2.19651	1.46456	154	90	46	9310	3153748	5173	38	112	48
00114091019M24BFF2	A	SouthChina	Guangdong	Han	Hakka	Female	199685812	19959.2	97.58	96.99	90.38	89.28	40.7	199398143	99.8559	195638914	98	0.0118176	194.7	35.3	6.40605	0.982777	1.00682	2.61886e-07	3136098	2919725	96043	120330	2.19959	1.43713	141	64	41	8990	3116908	4766	42	112	38
00114091026F00BFF2	A	SouthChina	Guangdong	Han	Mandarin	Male	196789050	19660.8	98.12	96.24	91.48	86.91	41.68	196314954	99.7591	192406370	97.8	0.0308565	208.6	43.2	6.29575	0.98708	0.502113	0.00091138	3105450	2890556	95591	119303	2.20125	1.4781	172	81	43	9326	3085898	8509	39	95	44
00114091026M21BFF2	A	EastChina	Anhui	Han	Mandarin	Female	191554842	19139	98.39	97.58	92.1	90.05	42.71	190979480	99.6996	185427676	96.8	0.0386697	216.4	42.5	6.13694	0.980433	0.938959	0.000282147	3155546	2937824	96504	121218	2.20506	1.47617	158	84	46	9406	3135829	8574	43	110	49
00114091031F00BFF2	A	SouthChina	Guangdong	Han	Hakka	Male	191508214	19142	97.75	95.37	91.03	85.78	41.32	191133929	99.8046	185315950	96.8	0.00984143	219.8	40.8	6.14097	0.989379	0.506299	1.33138e-07	3105751	2891385	94854	119512	2.19885	1.46211	152	81	46	9395	3086123	4635	37	108	42
00114091031M24BFF2	A	SouthChina	Guangdong	Han	Hakka	Female	197943960	19787.5	97.66	97	90.56	89.22	40.75	197726852	99.8903	194034640	98	0.0111753	199.1	35.3	6.35334	0.982998	1.0017	0.000201302	3165414	2945340	97558	122516	2.20264	1.46661	145	69	41	9315	3145818	5408	34	126	49
00114091035M17BFF2	A	SouthChina	Guangdong	Han	Cantonese	Female	199056412	19899.9	96	96.63	90.19	88.12	41.12	198902313	99.9226	192502734	96.7	0.0129735	225.4	48.2	6.37964	0.985154	0.988616	8.99893e-08	3144699	2930853	95210	118636	2.19892	1.44658	157	68	45	9157	3125394	8147	38	114	50
00114091039F00BFF2	A	SouthChina	Guangdong	Han	Unknown	Male	218539928	21835.9	98.11	96.48	91.47	87.31	41.2	218175099	99.8331	211442916	96.8	0.037288	218.8	47.1	7.00457	0.990194	0.506273	0.000849006	3136268	2918366	96364	121538	2.20033	1.48178	161	73	38	9315	3116697	7648	37	113	44
00114091039M19BFF2	A	EastChina	Jiangxi	Han	Gan	Female	223202552	22312.7	98.46	97.53	92.71	90.05	41.02	222917769	99.8724	216132790	96.8	0.01905	200.8	42.1	7.16786	0.985728	0.974197	2.04599e-07	3175233	2953841	97593	123799	2.19808	1.48696	170	83	43	9495	3155306	5822	38	113	47
00114091047M19BFF2	A	SouthChina	Guangdong	Han	Hakka	Female	203227378	20313.4	98.72	98.14	93.52	92.08	40.68	202918254	99.8479	198944134	97.9	0.0184082	195.2	35.4	6.52328	0.984779	0.966352	1.03622e-07	3139912	2922839	96016	121057	2.19969	1.45808	153	63	41	9026	3120722	4677	45	105	48
00114091057M27BFF2	A	SouthChina	Guangdong	Han	Cantonese	Female	207274268	20720.3	98.1	97.74	91.6	90.97	40.7	207013307	99.8741	203667102	98.3	0.0120201	197.4	35.5	6.65378	0.984184	0.989461	0.000831517	3138976	2921916	95982	121078	2.20195	1.46303	161	84	35	9239	3119510	4373	40	120	38
00114091059M26BFF2	A	SouthChina	Guangdong	Han	Cantonese	Female	217163754	21709.4	98.26	97.03	92.53	89.64	40.86	216646384	99.7618	212313650	97.8	0.017299	200.9	35.8	6.96704	0.985874	1.0006	0.000449811	3148505	2930623	96429	121453	2.20036	1.44401	162	77	45	9292	3128934	4754	32	120	46
00114091063M26BFF2	A	CentralChina	Hubei	Han	Mandarin	Female	176651742	17658.2	97.59	96.82	90.38	88.77	40.66	176415437	99.8662	172497668	97.6	0.012307	197.8	36.2	5.66627	0.979648	0.996835	0.00213514	3127482	2913566	94970	118946	2.2008	1.46972	157	81	44	9109	3108224	5663	36	109	42
00114091075M24BFF2	A	SouthChina	Guangdong	Han	Cantonese	Female	234118730	23397.5	98.34	97.69	92.33	90.86	40.39	233749388	99.8422	229252400	97.9	0.0185762	187.2	33.7	7.51338	0.985908	0.988708	0.000327102	3162524	2943759	96759	122006	2.19931	1.48213	159	75	43	9283	3142897	5602	39	117	40
00114091076M23BFF2	A	SouthChina	Guangdong	Han	Cantonese	Female	170061206	17001	97.44	96.72	89.87	88.39	40.72	169794869	99.8434	166697602	98	0.0103288	205.1	36.8	5.45433	0.978685	1.00504	1.42763e-07	3142043	2926525	95695	119823	2.20259	1.46964	136	66	37	9363	3122493	3982	36	112	50
00114091082F00BFF2	A	SouthChina	Guangdong	Han	Cantonese	Male	196626140	19652.5	98.27	96.67	92.02	88.18	41.1	196158254	99.762	190624032	96.9	0.0101056	208.8	38.8	6.30322	0.989053	0.508679	0.00101449	3128005	2910640	96328	121037	2.19883	1.46664	163	71	43	9223	3108599	4501	39	119	46
00114091082M25BFF2	A	SouthChina	Guangdong	Han	Cantonese	Female	191579784	19151.9	98.29	97.84	92.1	91.15	41.05	191385271	99.8985	187362196	97.8	0.0190124	198.7	36.3	6.15087	0.983316	0.989077	1.04878e-07	3157748	2938408	96790	122550	2.19559	1.50046	176	81	44	9287	3138119	4486	38	112	45
00114091084M24BFF2	A	SouthChina	Guangdong	Han	Unknown	Female	215665478	21558	98.23	97.26	91.78	89.6	40.77	215354851	99.856	210211518	97.5	0.0150027	199	37.9	6.92309	0.98585	0.994035	1.98433e-07	3160082	2941940	96552	121590	2.19937	1.48785	154	75	46	9282	3140609	5530	42	115	42
00114091093M16BFF2	A	SouthChina	Guangdong	Han	Cantonese	Female	219561642	21948.9	98.67	98	93.29	91.53	40.95	219012690	99.75	214925746	97.9	0.0204529	201.9	36.3	7.04455	0.986118	0.985759	0.000268562	3157480	2938768	96810	121902	2.20294	1.4569	162	70	43	9380	3137742	5119	39	111	41
00114091094M24BFF2	A	SouthChina	Guangdong	Han	Cantonese	Female	231276800	23117.8	98.04	97.56	92.02	90.62	41.84	230462185	99.6478	225184994	97.4	0.0155457	215.7	41.4	7.40784	0.987328	0.974568	1.56872e-07	3160438	2941199	96920	122319	2.20555	1.46297	161	76	49	9269	3140912	5341	35	113	45
00114091095M16BFF2	A	SouthChina	Guangdong	Han	Cantonese	Female	208565406	20846.5	98.13	97.51	92.08	90.3	41.33	208378567	99.9104	201025938	96.4	0.0136365	198.3	37.6	6.69974	0.985452	0.980006	6.83725e-08	3151734	2936588	95324	119822	2.20178	1.45616	148	76	45	9371	3132034	8916	34	109	49
00114091102M27BFF2	A	SouthChina	Guangdong	Han	Cantonese	Female	227191774	22706.8	97.96	96.75	91.13	88.14	40.97	226865552	99.8564	221823698	97.6	0.0172429	232.2	46.9	7.29076	0.987545	0.987127	0.000409632	3159322	2940334	96988	122000	2.20304	1.47046	152	74	44	9313	3139753	4995	38	98	48
00114091103M19BFF2	A	SouthChina	Guangdong	Han	Cantonese	Female	271228432	27113.3	98.28	97.68	92.52	90.59	41.19	270679381	99.7976	265464110	97.9	0.0241314	198	35.8	8.70449	0.987553	0.983452	0.00094991	3184931	2962601	98105	124225	2.20071	1.48001	154	80	46	9478	3165103	5852	37	109	40
00114091109M16BFF2	A	SouthChina	Guangdong	Han	Mandarin	Female	155001652	15495.4	98.57	97.94	92.97	90.86	41.08	154794515	99.8664	151677748	97.9	0.0122834	201.3	36.8	4.97722	0.973359	0.985947	0.000304322	3096368	2885412	93963	116993	2.19964	1.44553	139	67	44	8998	3077367	5716	35	103	48
00114091110M18BFF2	A	SouthChina	Guangdong	Han	Cantonese	Female	209610120	20944.2	97.68	97.53	91.3	90.5	41.11	208961334	99.6905	204250476	97.4	0.016814	219.1	44.4	6.71155	0.986206	0.975911	7.69404e-05	3163109	2943684	97126	122299	2.20205	1.50082	153	71	42	9361	3143354	5226	37	116	50
00114091111M21BFF2	A	SouthChina	Guangdong	Han	Cantonese	Female	200061372	19995.9	98.52	97.64	92.72	90.55	40.5	199727524	99.8331	195959682	97.9	0.0154727	194.6	35.1	6.41842	0.983837	0.995268	1.59405e-08	3131244	2916151	95528	119565	2.19774	1.45896	138	84	44	9240	3111747	5159	34	114	53
00114091113M19BFF2	A	SouthwestChina	Yunnan	Han	Mandarin	Female	260722180	26062.4	98.49	97.74	92.88	90.56	41.08	260271040	99.827	255253334	97.9	0.0212247	194.8	35	8.37047	0.987287	0.982552	0.000765979	3170610	2949852	97622	123136	2.19968	1.46306	161	77	47	9447	3150760	8129	36	109	47
00114091114M23BFF2	A	NorthwestChina	Xinjiang	Han	Mandarin	Female	226340528	22624.4	98.28	97.95	92.15	91.54	40.96	226025293	99.8607	221126276	97.7	0.0217164	191.5	35	7.26586	0.985784	0.979961	0.000456694	3170970	2950975	97304	122691	2.20051	1.4862	154	75	43	9391	3151254	7723	37	104	47
00114091117M25BFF2	A	SouthwestChina	Sichuan	Han	Mandarin	Female	195928096	19584.5	98.2	96.57	91.66	87.98	41.01	195716635	99.8921	190077246	97	0.00694919	212.9	40.4	6.29575	0.984459	0.998188	6.89009e-07	3144753	2927811	96226	120716	2.20184	1.46853	153	82	48	9234	3125171	6651	42	115	49
00114091118F00BFF2	A	SouthChina	Guangdong	Han	Cantonese	Male	195232332	19514.6	98.36	96.89	92.31	88.73	40.72	194950108	99.8554	188946792	96.8	0.020021	218.7	41.7	6.2666	0.989212	0.513451	1.97604e-08	3099258	2887820	94204	117234	2.20171	1.45119	141	63	48	9057	3080029	7413	34	108	48
00114091118M18BFF2	A	SouthChina	Guangdong	Han	Cantonese	Female	202989244	20291.8	98.65	98.15	93.38	91.61	40.8	202767116	99.8906	198792468	97.9	0.0145132	190.5	33.8	6.52142	0.98286	0.992471	2.87644e-07	3145415	2930849	95298	119268	2.20008	1.46399	140	83	39	9222	3125969	6951	42	99	42
00114091122M17BFF2	A	SouthChina	Guangdong	Han	Cantonese	Female	267854234	26775	98.65	97.98	93.22	90.9	40.48	267484376	99.8619	263092604	98.2	0.0136388	198.3	35.7	8.60054	0.986972	0.992572	0.000156214	3164319	2942887	97631	123801	2.20118	1.47726	168	75	42	9297	3144755	5851	41	112	50
00114091125M25BFF2	A	SouthChina	Guangdong	Han	Cantonese	Female	199110250	19904.6	97.55	96.96	90.36	89.19	40.98	198684658	99.7863	194706354	97.8	0.0127736	195.7	34.6	6.38702	0.98294	0.989651	0.00107354	3144639	2927491	96165	120983	2.19958	1.47442	145	81	40	9432	3124826	4850	41	114	47
00114091128M24BFF2	A	NortheastChina	Heilongjiang	Han	Mandarin	Female	206109568	20604.6	98.16	97.79	91.67	90.98	41	205649958	99.777	201329550	97.7	0.0191212	201.1	36.3	6.61342	0.984523	0.972568	1.61522e-07	3156869	2939540	96286	121043	2.2017	1.48855	150	72	48	9390	3137067	7706	39	109	44
00114091135M21BFF2	A	SouthChina	Guangdong	Han	Cantonese	Female	174617312	17455.9	98.37	97.17	92.41	89.29	40.41	174271474	99.8019	171391162	98.2	0.0125769	202.6	36	5.60305	0.978212	1.02168	1.10233e-07	3102138	2891747	93965	116426	2.1991	1.43117	149	66	47	8999	3083032	6412	38	107	47
00114091147M16BFF2	A	CentralChina	Hubei	Han	Mandarin	Female	261502892	26140.9	98.59	98	93.08	91	40.45	261128735	99.8569	256465682	98.1	0.0169335	199.6	36.2	8.39462	0.986555	0.993731	0.000211777	3164194	2943391	97578	123225	2.20009	1.48771	151	70	41	9284	3144607	7908	36	95	46
00114091158M17BFF2	A	SouthChina	Guangdong	Han	Mandarin	Female	218921880	21881.6	97.76	97.64	91.54	90.74	41.6	218606545	99.856	213533752	97.5	0.0169542	218	41.9	7.02591	0.986675	0.974956	0.000307479	3181449	2961895	97505	122049	2.19805	1.50538	142	82	40	9309	3161675	6613	34	123	48
00114091162M19BFF2	A	SouthChina	Guangdong	Han	Cantonese	Female	233196142	23312.4	98.66	98.01	93.22	91.02	40.66	232979842	99.9072	228795934	98.1	0.0140402	197.3	35.1	7.4928	0.985519	1.00328	0.000324476	3167903	2948638	96963	122302	2.19593	1.48052	160	73	45	9296	3148277	5644	42	101	43
00114091165M23BFF2	A	SouthChina	Guangdong	Han	Cantonese	Female	249246596	24913.4	98.48	97.55	92.64	90.3	41	248906143	99.8634	243296320	97.6	0.0186233	194.6	34.8	7.99657	0.987609	0.986653	2.48249e-08	3164291	2944263	97208	122820	2.1972	1.47786	147	78	41	9495	3144380	6573	39	114	53
00114091170M17BFF2	A	SouthChina	Guangdong	Han	Cantonese	Female	252088424	25190.6	97.62	97.87	91.21	91.46	40.92	250965231	99.5544	245110990	97.2	0.0181352	210.8	42.1	8.06085	0.988372	1.00045	3.09814e-08	3167345	2946260	97384	123701	2.19851	1.48263	159	84	43	9376	3147586	5526	35	116	50
00114091171F00BFF2	A	EastChina	Shandong	Han	Mandarin	Male	196230924	19611.6	97.81	95.48	91.19	86.01	40.88	195853180	99.8075	190726144	97.2	0.0106962	219.6	42	6.29262	0.990029	0.510591	1.02654e-07	3109368	2894160	95438	119770	2.19982	1.44186	156	74	44	9194	3089955	7359	37	110	46
00114091171M24BFF2	A	SouthChina	Guangxi	Han	Mandarin	Female	185168336	18510.4	97.73	96.72	90.63	88.25	40.55	184918357	99.865	181552964	98	0.0113572	203.4	37.2	5.9392	0.981017	1.005	0.000585879	3159685	2941287	96434	121964	2.20127	1.49285	166	83	42	9097	3140263	4954	33	106	52
00114091173M24BFF2	A	EastChina	Jiangsu	Han	Mandarin	Female	211313012	21115.4	98.48	97.82	92.78	90.66	41.16	210525030	99.6271	205023556	97	0.0288402	210.5	40.5	6.76729	0.985394	1.0052	4.16436e-08	3151501	2933725	96680	121096	2.1977	1.47405	152	72	43	9255	3132003	6857	38	103	48
00114091174F00BFF2	A	SouthChina	Guangdong	Han	Cantonese	Male	229416984	22932	98.35	96.69	92.26	88.15	40.98	229072669	99.8499	221407324	96.5	0.0176014	220.1	41.2	7.36228	0.992569	0.510793	2.80222e-05	3128609	2912858	95773	119978	2.20199	1.4837	158	82	41	9288	3109051	7851	35	112	49
00114091174M17BFF2	A	SouthChina	Guangdong	Han	Cantonese	Female	160573202	16042.8	98.19	96.95	91.9	88.78	41.64	160145039	99.7334	156615730	97.5	0.0293288	227.8	45.3	5.14795	0.978189	0.984065	1.43332e-06	3091728	2882910	93208	115610	2.19895	1.40745	155	67	39	9180	3072383	5953	38	97	46
00114091177M24BFF2	A	SouthChina	Guangdong	Han	Cantonese	Female	222243400	22217	98.19	97.89	91.84	91.26	40.92	222029626	99.9038	217715018	98	0.0212648	198.8	35.5	7.13897	0.98612	0.982446	0.000162368	3151959	2934060	96505	121394	2.20135	1.42913	141	73	48	9275	3132331	5384	35	113	47
00114091179M17BFF2	A	SouthChina	Guangdong	Han	Cantonese	Female	180281144	18018.1	97.63	96.86	90.53	88.38	40.89	178888999	99.2278	176209756	97.7	0.0179543	228.3	43	5.75302	0.982712	0.995579	0.00182618	3136143	2921120	95476	119547	2.20006	1.47173	158	74	45	9268	3116662	4969	48	99	48
00114091191M22BFF2	A	SouthChina	Guangdong	Han	Min	Female	204820340	20474.7	96.97	96	90.12	88.26	41.15	204650761	99.9172	199641224	97.5	0.0124532	229.5	43.2	6.56484	0.985727	0.99219	1.71553e-08	3135389	2919818	95688	119883	2.19766	1.43308	155	78	45	9368	3115789	4645	34	102	49
00114091193M25BFF2	A	EastChina	Shanghai	Han	Mandarin	Female	201404894	20134.9	98.17	97.78	91.81	91.04	40.91	201017902	99.8079	197612982	98.1	0.0112124	197.5	35.1	6.46485	0.983656	0.986355	3.60672e-08	3154998	2937514	96169	121315	2.20149	1.45719	159	78	40	9295	3135442	6151	37	107	44
00114091195F00BFF2	A	SouthChina	Guangdong	Han	Cantonese	Male	232394724	23231.1	98.28	97.25	92.32	89.55	40.85	232196133	99.9145	224981230	96.8	0.0228084	209.2	39.4	7.46649	0.992947	0.513378	2.77982e-08	3149651	2929284	97212	123155	2.19626	1.52673	165	84	35	9235	3130162	5174	37	114	41
00114091195M23BFF2	A	SouthChina	Guangdong	Han	Cantonese	Female	189745086	18960.5	97.7	97.03	90.78	88.92	41.16	188912479	99.5612	186157140	98.1	0.0192003	224.1	41.7	6.07381	0.983841	1.00019	0.000271185	3165697	2947149	96901	121647	2.20206	1.48834	180	74	42	9378	3145953	4353	38	112	50
00114091205M19BFF2	A	SouthChina	Guangdong	Han	Cantonese	Female	242792120	24270.3	98.08	97.82	92.78	91.58	41.13	242536449	99.8947	236981732	97.6	0.00988869	194.3	35.2	7.79128	0.987003	0.968937	0.00143854	3163436	2943886	96916	122634	2.19854	1.49029	154	72	43	9452	3143476	5459	41	102	45
00114091207M18BFF2	A	CentralChina	Henan	Han	Mandarin	Female	188830902	18874	98.17	97.22	92	89.49	41.06	188533793	99.8427	184831892	97.9	0.00636631	195.4	35.8	6.05743	0.982439	0.939206	6.44458e-08	3137622	2922437	95525	119660	2.20218	1.49606	167	85	38	9361	3117898	7244	31	115	39
00114091210M24BFF2	A	SouthChina	Guangdong	Han	Cantonese	Female	197593304	19750.4	97.48	97.29	90.43	89.74	40.59	197356854	99.8803	193661960	98	0.0178401	201.5	37.4	6.33723	0.98413	0.98865	4.62738e-09	3139741	2924023	95688	120030	2.20147	1.45036	160	74	43	9236	3120266	4431	35	109	46
00114091211M19BFF2	A	SouthChina	Guangdong	Han	Cantonese	Female	217525834	21743	98.53	97.89	92.9	90.76	40.75	217106951	99.8074	213079874	98	0.0152596	196.3	35.4	6.97972	0.984173	0.990415	0.000394161	3153618	2935621	96611	121386	2.19823	1.45705	157	78	32	9184	3134174	4624	39	102	46
00114091212M26BFF2	A	SouthChina	Guangdong	Han	Cantonese	Female	209440256	20936.2	97.45	97.55	90.4	90.46	40.87	209083970	99.8299	205486102	98.1	0.0199402	200.7	36.4	6.715	0.98548	0.994118	4.66638e-07	3148845	2932524	96184	120137	2.19978	1.46967	145	77	46	9225	3129422	4579	36	99	48
00114091215M19BFF2	A	SouthChina	Guangdong	Han	Cantonese	Female	278261010	27812.3	98.31	97.3	92.39	89.79	42.33	277227549	99.6286	270645336	97.3	0.0320708	216.7	41.2	8.90559	0.987272	0.967002	0.000491344	3165892	2945192	97706	122994	2.20021	1.47705	153	89	55	9489	3146030	5662	39	108	44
00114091218M24BFF2	A	SouthChina	Guangdong	Han	Min	Female	223801920	22371.8	97.51	97.63	90.59	90.73	41	223568467	99.8957	219390000	98	0.0196478	192.8	34.3	7.17801	0.985932	0.976616	0.000187954	3156499	2938560	96135	121804	2.20161	1.47668	149	78	37	9318	3136858	5179	40	102	52
00114091222M23BFF2	A	EastChina	Shandong	Han	Mandarin	Female	182030786	18195.7	97.61	97.65	90.96	90.98	41.44	181698180	99.8173	177811474	97.7	0.019777	188.9	33.3	5.83359	0.980907	0.975377	1.10203e-07	3115375	2901399	95144	118832	2.19964	1.42603	147	77	49	9218	3096002	6473	35	105	41
00114091227M24BFF2	A	SouthChina	Guangdong	Han	Mandarin	Female	206288236	20622.9	98.06	97.52	91.43	90	41.09	206114001	99.9155	202288010	98.1	0.0120978	202.8	36.5	6.62659	0.984944	0.986678	4.44487e-07	3160740	2942565	96704	121471	2.19905	1.4903	154	79	45	9252	3141242	7247	36	106	50
00114091234F00BFF2	A	CentralChina	Hubei	Han	Unknown	Male	212144446	21197.8	98.06	96.51	91.26	87.32	41.03	211741964	99.8103	205084612	96.7	0.0398085	221.1	48.6	6.7973	0.989493	0.502539	0.000821079	3137367	2918912	96677	121778	2.19726	1.49231	169	74	48	9341	3117831	8226	37	107	44
00114091234M17BFF2	A	CentralChina	Hubei	Han	Mandarin	Female	238094770	23794.9	98.23	97.46	92.17	90.2	41.26	237274818	99.6556	230716456	96.9	0.0172896	203.7	39.5	7.62553	0.987612	0.978495	0.000201937	3181311	2958186	98430	124695	2.19949	1.49062	170	91	36	9596	3161337	7463	35	108	49
00114091235M18BFF2	A	SouthChina	Guangdong	Han	Cantonese	Female	216523256	21638.4	98.17	96.86	91.81	88.48	42.25	215825591	99.6778	210796416	97.4	0.0312438	229.7	44.2	6.93824	0.984689	0.954026	0.000211136	3152352	2934615	96408	121329	2.20004	1.45006	166	83	48	9465	3132398	5594	35	108	48
00114091239M19BFF2	A	NorthwestChina	Qinghai	Han	Mandarin	Female	215490662	21537	98	97.81	92.78	91.15	40.75	215064012	99.802	210566554	97.7	0.0159131	187.4	34.1	6.91298	0.985422	0.984165	0.000998267	3138986	2923914	95426	119646	2.20625	1.45637	153	83	43	9293	3119336	12550	30	112	41
00114091242M19BFF2	A	SouthChina	Guangdong	Han	Cantonese	Female	198911044	19882.2	98.25	96.35	91.63	87.11	40.74	198652233	99.8699	192603888	96.8	0.00948186	199	44.5	6.38648	0.983934	0.993608	0.00049194	3153489	2936530	96295	120664	2.19973	1.46634	150	76	40	9257	3133881	4717	40	132	48
00114091247M17BFF2	A	SouthChina	Guangdong	Han	Cantonese	Female	223066256	22293.3	98	97.53	91.88	90.54	41.91	222615062	99.7977	217096080	97.3	0.015736	221.2	43.9	7.15533	0.986682	0.956752	0.000607159	3171037	2950979	97491	122567	2.19797	1.48247	163	77	43	9477	3151028	5247	41	107	50
00114091260F00BFF2	A	SouthChina	Guangdong	Han	Cantonese	Male	218431970	21834.5	98.3	96.36	92.03	87.43	40.91	218165807	99.8781	211218454	96.7	0.0176621	225.1	43.2	7.01105	0.992761	0.507999	3.58831e-07	3109215	2894569	94983	119663	2.20068	1.44629	163	80	41	9242	3089832	8369	35	122	46
00114091260M16BFF2	A	SouthChina	Guangdong	Han	Cantonese	Female	242738978	24266.7	98.48	97.78	92.87	90.71	40.8	242292056	99.8159	236664266	97.5	0.0199083	194.4	36	7.79129	0.986359	1.00363	0.00114314	3156143	2938278	96356	121509	2.19839	1.47502	158	84	46	9233	3136676	8599	36	115	47
00114091264M20BFF2	A	SouthChina	Guangdong	Han	Min	Female	198108386	19804.6	98.47	97.61	92.55	90.38	40.91	197775462	99.8319	193839930	97.8	0.0140273	199.4	35.4	6.35996	0.984239	0.986386	6.42318e-09	3148771	2931719	96256	120796	2.19872	1.45554	157	80	48	9228	3129244	4263	39	116	57
00114091267F00BFF2	A	SouthChina	Guangdong	Han	Mandarin	Male	231409214	23133.6	98.39	96.77	92.38	88.52	40.86	231153473	99.8895	223020830	96.4	0.0190622	221.6	41.6	7.42817	0.993982	0.512669	0.000773234	3146590	2926116	97403	123071	2.19852	1.48685	152	75	38	9300	3126852	5716	34	103	52
00114091267M16BFF2	A	SouthwestChina	Chongqing	Han	Mandarin	Female	177600668	17754	98.47	97.75	92.83	90.58	41.14	177397891	99.8858	174121922	98	0.0199185	196.5	35.2	5.7026	0.979954	0.99688	0.0015455	3149815	2931938	96444	121433	2.2025	1.48462	151	74	42	9407	3130030	6348	45	108	39
00114091270M25BFF2	A	EastChina	Jiangxi	Han	Mandarin	Female	212050786	21198.5	98.19	96.96	92.27	89.45	41.08	211836558	99.899	207681528	97.9	0.0161851	204.4	36.6	6.81176	0.985552	0.987436	2.82012e-09	3140229	2923473	96186	120570	2.19781	1.44663	165	80	46	9139	3120745	6980	33	109	48
00114091271F00BFF2	A	SouthChina	Guangdong	Han	Mandarin	Male	183608456	18352.7	97.93	96.46	90.7	87.35	40.89	183092643	99.7191	179932868	98	0.0205067	232.8	48.6	5.88456	0.98812	0.515704	0.00180095	3083398	2873914	93278	116206	2.19976	1.4672	138	79	39	9094	3064090	6860	43	108	47
00114091271M27BFF2	A	EastChina	Jiangxi	Han	Mandarin	Female	162615246	16249	97.63	96.95	90.58	88.71	41.5	160944850	98.9728	158347972	97.4	0.0203704	226.1	43	5.17599	0.977978	0.995561	0.000198644	3101542	2892709	93371	115462	2.2005	1.45922	146	75	40	9069	3082409	7247	33	117	45
00114091272M27BFF2	A	SouthChina	Guangdong	Han	Mandarin	Female	277509610	27740.5	98.09	97.91	92.86	91.94	41.45	277188165	99.8842	270597176	97.5	0.0103645	191	34.6	8.89973	0.987918	0.969286	7.04338e-08	3164141	2943017	97408	123716	2.19959	1.48394	159	92	47	9327	3144499	5572	36	118	50
00114091282F00BFF2	A	SouthChina	Guangdong	Han	Mandarin	Male	215075754	21501.2	98.08	97.18	91.84	89.08	40.84	214819520	99.8809	209552896	97.4	0.024906	214.7	39.6	6.90582	0.991849	0.520039	5.31173e-08	3126743	2908441	96544	121758	2.20207	1.50035	167	72	45	9318	3107081	7196	38	106	47
00114091282M22BFF2	A	NortheastChina	Heilongjiang	Han	Mandarin	Female	225514688	22542.7	97.54	97.62	90.72	90.76	41.14	225242881	99.8795	220942498	98	0.0200893	192.8	34.5	7.23302	0.985977	0.98713	7.57561e-08	3183095	2961899	97614	123582	2.19915	1.49132	159	86	42	9353	3163502	7809	36	106	41
00114091286M17BFF2	A	SouthwestChina	Sichuan	Han	Mandarin	Female	185276192	18506	98.46	97.36	92.43	89.5	40.56	184980745	99.8405	181396580	97.9	0.0175273	184.9	36.5	5.94242	0.98083	0.989371	0.0001654	3143395	2928357	95384	119654	2.20369	1.4904	166	87	40	9248	3123898	9328	38	109	48
00114091288M17BFF2	A	SouthChina	Guangdong	Han	Cantonese	Female	161633838	16152.5	98.17	96.96	91.13	88.13	42.33	160845292	99.5121	156541034	96.8	0.034188	221.6	41.8	5.17132	0.973029	0.976018	0.000373289	3108382	2896509	94375	117498	2.2014	1.44111	151	72	44	9318	3088764	3973	38	92	40
00114091291M26BFF2	A	SouthChina	Guangdong	Han	Cantonese	Female	204223342	20416	98.06	97.79	92.69	91.43	41.25	203830884	99.8078	199243372	97.6	0.00863601	200.2	35.9	6.54727	0.98431	0.94783	0.000418834	3136855	2920959	96000	119896	2.20065	1.47807	136	78	49	9324	3117207	5237	40	98	43
00114091293M17BFF2	A	EastChina	Anhui	Han	Mandarin	Female	215290366	21521.2	98.5	97.82	92.95	90.83	41.09	214805480	99.7748	210554824	97.8	0.0233319	192.5	34.3	6.90634	0.984525	0.979401	4.78328e-08	3150581	2933401	96116	121064	2.19974	1.44625	154	79	46	9268	3131038	7214	46	105	46
00114091295F00BFF2	A	SouthChina	Guangdong	Han	Unknown	Male	193542314	19342.6	98.22	96.15	91.79	86.92	41.73	193343299	99.8972	177912620	91.9	0.0161077	235.8	49.8	6.20261	0.987113	0.492652	4.1778e-07	3126879	2908799	96853	121227	2.20201	1.48698	139	74	47	9276	3107382	12593	38	115	50
00114091295M17BFF2	A	SouthChina	Guangdong	Han	Min	Female	184465690	18440.5	98.2	97.42	91.6	89.68	40.77	184100947	99.8023	181077162	98.2	0.00899985	200	35.5	5.91763	0.981363	0.994331	0.00172019	3152398	2933637	96865	121896	2.20055	1.46621	167	81	35	9210	3132868	4091	35	108	48
00114091299M18BFF2	A	SouthChina	Guangdong	Han	Hakka	Female	227213674	22713	98.37	97.23	92.56	89.66	40.39	226891362	99.8581	222590558	98	0.0153423	192	34.3	7.29377	0.984072	1.00611	0.000430624	3154412	2935693	96638	122081	2.19894	1.48497	158	84	43	9292	3134933	1590	40	106	48
00114091306M26BFF2	A	SouthChina	Guangdong	Han	Xiang	Female	221258410	22113.6	98.02	93.98	91.57	84.13	41.26	220822222	99.8029	216897560	98	0.00985951	190.9	34	7.08714	0.986199	0.967773	0.000693049	3164326	2946063	96535	121728	2.19971	1.48815	145	70	41	9410	3144556	6372	41	107	46
00114091310M24BFF2	A	EastChina	Anhui	Han	Hui	Female	242456348	24236.3	98.3	97	92.75	90.35	41.08	242035201	99.8263	236860824	97.7	0.0183773	194	34.9	7.78327	0.987093	0.989547	0.000387208	3156018	2938653	95930	121435	2.20094	1.46918	171	73	41	9236	3136564	12251	40	107	43
00114091311M20BFF2	A	SouthChina	Guangdong	Han	Cantonese	Female	204674162	20459.9	98.39	97.36	92.23	89.63	40.88	204409987	99.8709	200239010	97.8	0.0160183	205	37.3	6.57179	0.985255	0.985517	0.0008747	3159189	2941023	96470	121696	2.19755	1.46481	161	76	42	9286	3139497	4960	40	116	52
00114091315M16BFF2	A	EastChina	Jiangsu	Han	Mandarin	Female	254287344	25419.3	98.37	96.94	92.41	88.72	40.53	253770096	99.7966	249347416	98.1	0.0137525	200.6	36.6	8.15899	0.986535	1.00587	0.000626481	3179275	2957511	97932	123832	2.19586	1.49743	149	79	48	9383	3159576	7933	44	105	45
00114091333M19BFF2	A	SouthChina	Guangdong	Han	Cantonese	Female	259793926	25969.3	98.37	97.28	92.58	89.77	40.78	259252417	99.7916	254844272	98.1	0.0158602	190.8	33.8	8.33291	0.986041	1.0089	0.000351631	3177203	2955510	97931	123762	2.19797	1.48108	146	93	47	9334	3157568	5729	40	104	41
00114091334M23BFF2	A	SouthChina	Guangdong	Han	Hakka	Female	212867876	21279.3	97.42	97.54	90.31	90.47	41.04	212603340	99.8757	208569192	98	0.0192466	197.3	35.4	6.82789	0.985105	0.985124	7.72136e-08	3149772	2932272	96160	121340	2.19666	1.44633	154	87	40	9240	3130385	4650	36	105	42
00114091335M19BFF2	A	SouthChina	Guangdong	Han	Min	Female	272772380	27267.7	98.41	97.2	92.59	89.47	40.84	272293422	99.8244	267484936	98.1	0.0142625	194.3	34.6	8.75582	0.987048	0.996582	0.000253027	3181441	2959187	97984	124270	2.19964	1.46774	166	89	40	9348	3161732	5266	40	102	41
00114091338M19BFF2	A	SouthChina	Guangdong	Han	Cantonese	Female	194391612	19424.1	98.54	97.84	92.69	90.89	42.55	194015881	99.8067	189175400	97.3	0.0396774	205	39.6	6.2346	0.977101	0.973045	2.10234e-08	3130959	2915884	95549	119526	2.2026	1.47914	149	77	45	9195	3111511	5159	39	106	44
00114091342M26BFF2	A	SouthChina	Guangdong	Han	Cantonese	Female	245825472	24570	98	96.45	91.19	87.3	41.47	245152004	99.726	240038800	97.6	0.0168396	238.1	49.6	7.88139	0.988239	0.978572	5.05102e-08	3183089	2961228	98080	123781	2.20025	1.49688	173	89	50	9496	3163161	4683	36	116	47
00114091344F00BFF2	A	SouthChina	Guangdong	Han	Cantonese	Male	185882884	18571.4	98.21	96.32	91.78	87.13	40.98	185412510	99.747	181706044	97.8	0.0315104	211.8	44.4	5.95116	0.986926	0.50767	0.000368168	3120141	2903783	95738	120620	2.19704	1.49355	169	75	41	9259	3100684	5884	39	113	43
00114091344M12BFF2	A	SouthChina	Guangdong	Han	Cantonese	Female	190228094	19012.4	98.02	97.49	91.94	90.46	41.47	189520247	99.6279	185485050	97.5	0.0148603	221.8	44.3	6.09218	0.98433	0.991392	6.97307e-08	3159536	2939769	97218	122549	2.19837	1.49273	145	74	49	9263	3140038	4353	42	102	50
00114091345M23BFF2	A	SouthChina	Guangdong	Han	Cantonese	Female	189037946	18896.5	97.96	96.28	91.03	86.89	41.74	188273081	99.5954	184142640	97.4	0.0133446	240.6	50	6.05096	0.984374	0.986246	0.00723552	3137468	2921152	96080	120236	2.20118	1.47937	158	75	41	9172	3118061	4079	41	103	47
00114091349M18BFF2	A	SouthChina	Guangdong	Han	Cantonese	Female	199022858	19893.5	98.23	97.58	92.14	90.72	41.21	198572061	99.7735	194691672	97.8	0.017153	187.6	33	6.37996	0.983193	0.979779	1.34946e-06	3147839	2931930	95733	120176	2.20333	1.47617	176	83	38	9149	3128382	4337	37	111	48
00114091369M17BFF2	A	CentralChina	Hunan	Han	Mandarin	Female	225926580	22582.3	98.06	97.3	91.47	89.69	41.01	225512379	99.8167	221520476	98	0.0148037	202.2	36.5	7.24997	0.98603	0.984153	0.000254378	3154237	2935400	96755	122082	2.2014	1.47532	145	76	44	9160	3134771	7063	34	109	55
00114091375M23BFF2	A	SouthChina	Guangdong	Han	Cantonese	Female	199772542	19971.5	97.98	97.55	91.23	90.42	41.22	199464577	99.8458	194936692	97.6	0.0106301	200.4	36.1	6.41081	0.984281	0.969034	0.000598658	3163916	2945761	96738	121417	2.19987	1.49383	163	74	42	9384	3144136	5136	37	112	41
00114098001M26BFF2	A	SouthChina	Guangdong	Han	Min	Female	202269396	20219.5	98.43	97.67	92.47	90.63	40.97	201994449	99.8641	197596232	97.7	0.0158265	194.1	34.8	6.49287	0.98418	0.982818	0.000517693	3148606	2931651	96208	120747	2.19903	1.46896	160	88	47	9232	3129127	4789	38	106	48
00114098005M26BFF2	A	SouthChina	Guangdong	Han	Cantonese	Female	208052402	20794.4	98.17	97.53	92.15	90.27	40.98	207874196	99.9143	202950146	97.5	0.0126851	199.1	37.1	6.68533	0.985437	1.00179	2.3673e-07	3141755	2924597	96171	120987	2.20261	1.45334	151	78	41	9219	3122342	4912	36	106	40
00114101006F00BFF2	A	SouthChina	Guangdong	Han	Cantonese	Male	168628444	16852.7	97.77	95.2	91.06	85.41	41.49	168251767	99.7766	161319226	95.7	0.00779886	218.9	42.2	5.40137	0.983759	0.50101	0.00010774	3110418	2895607	95314	119497	2.20225	1.4754	166	75	47	9225	3090824	5793	39	119	44
00114101006M19BFF2	A	SouthChina	Guangdong	Han	Cantonese	Female	169757286	16955.2	97.84	97.38	91.24	90.1	40.83	168199631	99.0824	165280128	97.4	0.0211867	210.1	39.5	5.40323	0.979984	1.00817	0.00215271	3128769	2913402	95393	119974	2.19901	1.47928	158	85	38	9277	3109206	3714	37	112	50
00114101008M24BFF2	A	NorthChina	Neimenggu	Han	Mandarin	Female	166461916	16638.8	96.8	96.48	88.72	87.39	40.72	166070480	99.7648	163697806	98.3	0.00853814	210.1	39	5.33041	0.97983	0.998147	2.78044e-08	3126699	2913167	95110	118422	2.20144	1.45241	145	77	39	9116	3107444	6066	38	102	42
00114101009M23BFF2	A	SouthChina	Guangdong	Han	Cantonese	Female	216469512	21639.9	97.44	97.51	90.35	90.38	41.08	216195865	99.8736	212483490	98.2	0.0180462	202.2	36.2	6.9435	0.98597	0.997464	0.000870224	3140951	2926028	95256	119667	2.19729	1.46296	147	75	49	9228	3121370	7660	35	121	47
00114101012M17BFF2	A	SouthChina	Guangdong	Han	Cantonese	Female	194954024	19489.8	98.35	97.4	92.1	89.71	40.82	194700688	99.8701	191119756	98	0.0158217	206.9	37.4	6.25844	0.983565	0.975705	0.000196379	3151270	2933963	96406	120901	2.19738	1.47138	150	87	46	9325	3131622	2257	36	110	44
00114101013F00BFF2	A	SouthChina	Guangdong	Han	Cantonese	Male	213480710	21330.9	98.26	96.96	92.12	88.62	41.44	213146453	99.8434	206559350	96.8	0.0381621	209.5	43.6	6.8433	0.989794	0.500786	4.62341e-08	3140487	2922254	96621	121612	2.19913	1.50481	169	73	41	9284	3120963	8492	33	112	47
00114101013M23BFF2	A	SouthChina	Guangdong	Han	Cantonese	Female	236227022	23614.4	98.04	98.07	91.61	91.67	40.75	236015684	99.9105	231661270	98.1	0.0159384	203.3	37	7.58786	0.987036	1.00202	2.6132e-09	3178213	2956218	98097	123898	2.19813	1.48956	146	83	45	9431	3158509	5447	38	108	53
00114101019M24BFF2	A	CentralChina	Henan	Han	Mandarin	Female	162567702	16249.7	97.98	93.57	91.39	83.27	41.47	162034980	99.6723	159566492	98.2	0.00728873	198.5	35.8	5.20129	0.978507	0.965911	5.42151e-07	3119925	2907738	94317	117870	2.20207	1.48583	155	68	39	9281	3100338	5461	36	109	44
00114101021M17BFF2	A	SouthChina	Guangdong	Han	Cantonese	Female	151521564	15138.5	98.29	97.05	91.54	88.38	40.73	150464100	99.3021	146661524	96.8	0.0299257	214.4	41.5	4.83697	0.975617	0.999391	0.00137999	3111390	2898587	94670	118133	2.20213	1.44731	137	71	44	9164	3092106	3444	40	101	42
00114101023F00BFF2	A	SouthwestChina	Sichuan	Han	Unknown	Male	205389896	20523	97.94	96.64	90.9	87.66	42.86	204957668	99.7896	198298690	96.5	0.0381384	217.5	44	6.58443	0.984126	0.491645	0.000164049	3128942	2912021	96524	120397	2.2019	1.49497	147	94	47	9490	3109051	9123	34	114	45
00114101023M20BFF2	A	SouthChina	Guangdong	Han	Hakka	Female	200479926	20040.1	98.26	97.26	92.01	89.53	40.8	200218098	99.8694	196982264	98.3	0.0138535	201.8	36.7	6.43628	0.984533	0.979883	0.000339721	3154560	2936019	96692	121849	2.19834	1.48525	162	80	45	9457	3134805	5410	31	115	54
00114101025M24BFF2	A	SouthChina	Guangdong	Han	Mandarin	Female	222580080	22240.6	98.57	97.69	92.56	90.37	42.43	221877847	99.6845	216500432	97.3	0.0315506	215.5	41.4	7.1325	0.985515	0.971715	6.18618e-08	3154561	2936017	97108	121436	2.20345	1.45875	163	76	36	9485	3134605	6156	40	99	49
00114101026M24BFF2	A	SouthChina	Guangdong	Han	Cantonese	Female	216719544	21645.1	98.58	97.53	92.63	90.03	43.03	215350666	99.3684	208918188	96.4	0.0332338	213.3	40.7	6.92123	0.983658	0.947264	0.000325996	3130780	2916903	95397	118480	2.20203	1.46063	159	82	50	9489	3110989	8473	38	101	42
00114101032M18BFF2	A	EastChina	Shandong	Han	Mandarin	Female	216521240	21643.3	98.29	97.42	92.04	90.24	40.7	216311735	99.9032	212538556	98.2	0.0122822	191.8	34.4	6.95339	0.985068	0.989933	0.000137233	3158939	2940943	96538	121458	2.20116	1.49093	166	72	38	9327	3139246	7919	37	109	50
00114101043M24BFF2	A	EastChina	Shandong	Han	Mandarin	Female	238878264	23880	97.21	96.09	89.54	87.35	41.09	238367245	99.7861	234245642	98.1	0.0175309	205.3	37.6	7.66193	0.986629	0.992128	0.00109101	3161725	2942621	96909	122195	2.19899	1.47448	139	80	48	9409	3142080	7846	40	109	54
00114101046M23BFF2	A	SouthChina	Guangdong	Han	Cantonese	Female	152183000	15213.7	98.27	97.42	92.15	90.1	41.34	151826324	99.7656	148773332	97.8	0.00650182	200	35.4	4.8805	0.976131	0.989164	1.47251e-08	3097764	2886926	93806	117032	2.20395	1.44854	147	80	40	9150	3078518	3649	39	106	47
00114101048F00BFF2	A	SouthChina	Guangdong	Han	Cantonese	Male	178303446	17820.8	97.9	95.8	91.57	86.87	40.73	177954798	99.8045	172614338	96.8	0.0102012	206.3	40.6	5.71566	0.985865	0.513578	8.80327e-08	3107705	2893765	94914	119026	2.2027	1.48965	150	79	49	9368	3088027	4350	44	105	47
00114101048M17BFF2	A	SouthChina	Guangdong	Han	Cantonese	Female	229306354	22923	98.24	97.5	92.03	90.24	40.88	228952151	99.8455	225582698	98.4	0.0156628	199.7	35.3	7.36214	0.986067	0.993086	0.000196377	3168691	2948507	97223	122961	2.19774	1.47712	165	72	48	9413	3148935	5557	38	112	45
00114101050M22BFF2	A	SouthwestChina	Yunnan	Han	Mandarin	Female	181948518	18189	98.04	97.78	92.58	91.34	40.97	181676665	99.8506	178297812	98	0.00693374	205.6	36.6	5.83626	0.981847	0.963987	0.000205766	3133512	2918652	95411	119449	2.20337	1.45533	168	69	46	9298	3113837	7185	39	107	46
00114101052M17BFF2	A	NorthwestChina	Shaanxi	Han	Mandarin	Female	228227160	22815.4	98.23	97.33	91.89	89.7	40.81	227904340	99.8586	224424972	98.3	0.0134209	203	35.6	7.32942	0.986255	0.995061	0.000442785	3165738	2946205	97438	122095	2.199	1.49318	150	80	46	9381	3145912	8702	42	113	45
00114101054M26BFF2	A	SouthChina	Guangdong	Han	Cantonese	Female	271824316	27171.9	98	97.41	92.15	90.11	41.28	271531731	99.8924	266025482	97.9	0.00858509	199.1	35.4	8.72694	0.988405	0.98282	0.000201546	3176792	2954107	98183	124502	2.20296	1.49082	165	85	42	9357	3157106	5803	41	113	49
00114101058M22BFF2	A	SouthChina	Guangdong	Han	Cantonese	Female	160344864	16030	98.04	97	92.59	91.3	41.06	160071940	99.8298	156933578	97.9	0.00727037	204	36.3	5.14061	0.977717	0.973573	2.9154e-07	3110604	2898220	94503	117881	2.20124	1.4236	153	77	46	9155	3091239	3724	33	119	47
00114101062M21BFF2	A	SouthChina	Guangdong	Han	Min	Female	220691696	22059.5	98.2	98.18	92.2	92.09	40.68	220396531	99.8663	216450496	98.1	0.015105	197.4	35.9	7.08584	0.985446	0.992267	5.40826e-05	3147738	2929324	96715	121699	2.19878	1.43708	169	82	46	9237	3128099	4371	39	112	44
00114101065F00BFF2	A	SouthChina	Guangdong	Han	Cantonese	Male	199830834	19967.1	97.77	96.69	90.65	87.77	42.09	199311383	99.7401	194112422	97.1	0.0373983	216.5	46.2	6.39986	0.984325	0.493862	0.000396992	3128495	2911820	96304	120371	2.20077	1.49485	144	76	45	9302	3108884	7647	35	106	40
00114101065M20BFF2	A	SouthChina	Guangdong	Han	Cantonese	Female	210377270	21028.6	98.17	97.4	91.71	90.16	40.88	210163982	99.8986	206709746	98.3	0.0124845	198.3	35.7	6.75768	0.984915	0.988747	0.000864244	3163981	2944646	97227	122108	2.19997	1.47603	160	72	38	9391	3144235	4989	37	112	49
00114101068M24BFF2	A	SouthChina	Guangdong	Han	Cantonese	Female	266690776	26655.7	98.26	97	92.14	89.67	41.16	266102175	99.7793	261451922	98	0.0085608	196.6	35.6	8.55599	0.987936	0.987638	0.000156034	3178538	2957145	97806	123587	2.19992	1.48834	155	86	42	9321	3158828	5893	36	122	50
00114101069M17BFF2	A	SouthChina	Guangdong	Han	Mandarin	Female	156497850	15642.4	98.36	97.58	92.47	90.68	41.23	156235830	99.8326	153333228	98	0.0155623	190	33.2	5.01875	0.97473	0.979494	0.00103425	3099868	2888553	93938	117377	2.1989	1.44344	141	65	45	9125	3080559	4245	33	93	50
00114101077M25BFF2	A	SouthChina	Guangdong	Han	Cantonese	Female	214236098	21414.6	97.95	93.46	91.34	82.98	41.55	213813347	99.8027	210175342	98.1	0.00910055	196.5	35.2	6.85931	0.985728	0.952116	0.000144494	3161314	2944207	96242	120865	2.20066	1.48274	144	85	35	9287	3141672	5316	32	133	44
00114101079F00BFF2	A	SouthChina	Guangdong	Han	Mandarin	Male	162012274	16192	97.48	95.64	90.54	86.34	41.25	161711253	99.8142	156378852	96.5	0.0100104	211.8	40.9	5.19349	0.982466	0.499742	2.28824e-07	3098762	2885475	94783	118504	2.20119	1.46191	160	85	47	9124	3079467	5451	36	115	50
00114101079M23BFF2	A	SouthChina	Guangdong	Han	Mandarin	Female	215473726	21538.4	98.02	93.52	91.48	83.14	41.35	214954829	99.7592	211772980	98.3	0.00708682	197.6	35	6.90155	0.986321	0.983711	0.000914713	3170753	2951295	96980	122478	2.20182	1.49201	168	72	37	9418	3150962	6961	42	107	50
00114101080M17BFF2	A	EastChina	Fujian	Han	Mandarin	Female	223903860	22382.1	98.29	97.46	92.2	90.21	41.12	223521096	99.829	219333824	98	0.0145535	194.8	34.3	7.1811	0.986454	0.985552	0.000518075	3146396	2928835	96212	121349	2.20086	1.46285	145	70	43	9314	3126677	5344	42	109	48
00114101084M25BFF2	A	SouthChina	Guangdong	Hui	Xiang	Female	196919382	19682.9	97.97	93.01	91.29	82.07	41.36	196513612	99.7939	193358010	98.2	0.00826981	203.3	37.2	6.30614	0.984363	0.970959	0.00147386	3143381	2927950	95549	119882	2.20193	1.45773	147	66	48	9229	3123872	6082	33	94	49
00114101086F00BFF2	A	SouthChina	Guangdong	Han	Cantonese	Male	150403944	15031.1	97.52	95.74	90.69	86.69	41.21	150120724	99.8117	145634902	96.8	0.00838892	208.8	41.1	4.82172	0.978655	0.505577	0.000979044	3050400	2845734	91855	112811	2.20025	1.4262	152	65	42	8928	3031435	6522	34	95	40
00114101086M24BFF2	A	SouthChina	Guangdong	Han	Cantonese	Female	192406398	19233	97.98	93.51	91.41	83.17	41.58	191873325	99.7229	188272402	97.9	0.0072148	199.9	37.1	6.1595	0.983771	0.964345	2.28698e-07	3117420	2906085	94134	117201	2.20101	1.43279	156	79	43	9038	3098409	10359	38	104	46
00114101089M24BFF2	A	CentralChina	Hubei	Han	Unknown	Female	150467192	15041.8	98.05	96.99	91.45	89.01	40.89	150152039	99.7906	147343480	97.9	0.00495106	205	37	4.8276	0.976443	1.00032	1.98897e-07	3124458	2911076	95287	118095	2.20107	1.4818	168	73	44	9228	3104890	4744	34	103	50
00114101099M26BFF2	A	NorthwestChina	Ningxia	Han	Mandarin	Female	196004170	19594.5	98.02	97.1	91.51	89.25	41.42	195537273	99.7618	192135066	98	0.00830038	202.7	36	6.28789	0.984492	0.985915	4.45072e-08	3150589	2933842	96174	120573	2.20422	1.46842	148	79	42	9493	3130777	6686	36	108	45
00114101104M18BFF2	A	SouthChina	Guangdong	Han	Cantonese	Female	216817810	21674	98.21	97.36	91.86	89.81	40.84	216327092	99.7737	213273582	98.4	0.0133318	201.8	35.9	6.95698	0.985916	0.999139	0.000158634	3174566	2954831	97388	122347	2.19982	1.50392	169	87	42	9324	3154998	4660	38	103	44
00114101108M18BFF2	A	SouthChina	Guangdong	Han	Mandarin	Female	197962898	19789.1	97.69	97.06	90.65	89.28	40.61	197711873	99.8732	194098676	98	0.0123051	198.3	36.4	6.35131	0.982533	1.00837	8.23346e-05	3150551	2933358	96214	120979	2.19747	1.47835	159	76	41	9063	3131240	5275	46	104	44
00114101125F00BFF2	A	SouthChina	Guangdong	Han	Cantonese	Male	195322330	19521.9	98.3	96.82	92.18	88.66	40.87	194842098	99.7541	189669932	97.1	0.0105248	204.4	38.5	6.26057	0.988578	0.513064	0.000174596	3123107	2907054	95759	120294	2.20112	1.47321	149	69	47	9365	3103579	4382	37	105	39
00114101125M25BFF2	A	SouthChina	Guangdong	Han	Cantonese	Female	218610352	21853.7	98.1	97.26	91.88	89.83	41.48	218243710	99.8323	214015142	97.9	0.008724	195.8	34.7	7.01864	0.986033	0.987957	7.91246e-08	3168315	2948103	97231	122981	2.20061	1.45469	162	88	41	9293	3148567	4905	37	104	47
00114101131F00BFF2	A	EastChina	Anhui	Han	Unknown	Male	195220266	19513.9	97.69	95.8	90.98	86.94	40.64	194908043	99.8401	189875722	97.3	0.0122054	206.3	38	6.26178	0.988891	0.521953	0.000244105	3102242	2887875	94987	119380	2.20249	1.46784	143	71	40	9314	3082909	6263	38	104	50
00114101131M18BFF2	A	EastChina	Anhui	Han	Hui	Female	204139570	20407.9	97.69	96.8	90	88.49	40.72	203914054	99.8895	200222344	98.1	0.0104513	203	36.7	6.55517	0.983691	1.00514	1.24078e-07	3171881	2951834	97388	122659	2.19895	1.48058	156	78	43	9415	3152179	6813	33	111	46
00114101132F00BFF2	A	SouthChina	Guangdong	Han	Unknown	Male	181582710	18153.5	97.56	94.65	90.32	83.88	41.11	181313557	99.8518	177316636	97.7	0.00932009	241.8	46.4	5.826	0.987927	0.505865	1.54986e-08	3107799	2892628	95464	119707	2.20372	1.46309	151	78	42	9216	3088412	3806	35	107	43
00114101132M17BFF2	A	SouthChina	Guangdong	Han	Min	Female	185680394	18561.1	97.82	97.02	90.95	89.18	40.59	185420351	99.86	181743158	97.9	0.0112428	196.2	35.8	5.95727	0.980439	1.00087	0.000824036	3181010	2960789	97347	122874	2.20397	1.4921	158	80	43	9334	3161332	4296	39	101	48
00114101136M16BFF2	A	SouthChina	Guangdong	Han	Hakka	Female	211751830	21167.3	97.71	96.83	90.66	88.62	40.65	211537635	99.8988	207585702	98	0.0114846	201.2	36.5	6.79501	0.984676	1.00346	0.00174421	3153470	2936168	96457	120845	2.19875	1.45935	164	79	41	9320	3133854	5852	32	114	43
00114101142M17BFF2	A	SouthChina	Guangdong	Han	Mandarin	Female	184686420	18461	97.71	97.02	90.72	89.22	41.31	184321331	99.8023	180670710	97.8	0.0135167	193.3	34.1	5.92265	0.980776	0.990326	0.00161513	3140658	2925092	95905	119661	2.20112	1.48808	154	77	45	9305	3120989	6094	39	107	40
00114101146M26BFF2	A	SouthChina	Guangdong	Han	Cantonese	Female	196195502	19612.4	97.25	97.41	90.3	89.98	41.52	195890964	99.8448	191949200	97.8	0.0106821	200.9	36.4	6.28703	0.984443	0.980822	1.88351e-07	3132131	2916487	95401	120243	2.2002	1.43829	153	76	44	9255	3112659	4750	35	111	53
00114101151F00BFF2	A	SouthChina	Guangdong	Han	Mandarin	Male	190275728	19020.1	97.61	95.35	90.69	85.79	40.97	189992792	99.8513	184385230	96.9	0.0107151	218.9	41.2	6.10487	0.989451	0.515262	0.00121175	3101245	2890135	94064	117046	2.19898	1.45751	166	62	41	9297	3081730	8137	36	105	40
00114101153M25BFF2	A	SouthChina	Guangdong	Han	Cantonese	Female	212778302	21271.8	97.98	96.95	91.22	88.83	41.21	212449093	99.8453	208837224	98.1	0.00476041	210.1	37.7	6.83062	0.986198	0.99097	0.000127576	3149359	2931398	96583	121378	2.20097	1.48123	157	71	43	9510	3129423	4549	38	117	45
00114101155M26BFF2	A	SouthChina	Guangxi	Zhuang	Mandarin	Female	231351500	23126.7	97.06	97.41	89.85	89.94	41.22	231123818	99.9016	226745280	98	0.0122487	201.2	36.3	7.41476	0.987536	0.992341	1.93005e-07	3149619	2931142	96717	121760	2.20217	1.49817	153	85	48	9362	3129897	5671	33	116	56
00114101156M24BFF2	A	EastChina	Jiangxi	Han	Mandarin	Female	199000428	19885.9	96.84	97.02	89.62	88.8	42.28	198357127	99.6767	194093528	97.5	0.0306015	224.2	44	6.34999	0.982555	0.94596	0.00032854	3120442	2905922	95165	119355	2.20233	1.44732	154	78	46	9346	3100762	6468	35	103	42
00114101165M18BFF2	A	SouthwestChina	Yunnan	Han	Mandarin	Female	171031150	17096.5	97.76	97.25	90.86	89.85	40.73	170721447	99.8189	167643290	98	0.0114838	192.2	34.5	5.48607	0.977224	1.00451	3.68416e-08	3123370	2909089	95083	119198	2.20132	1.46031	150	68	38	9206	3103911	5721	41	118	41
00114101166M25BFF2	A	SouthChina	Guangdong	Han	Cantonese	Female	188805458	18874.8	96.91	96.64	89.87	87.89	40.94	188657504	99.9216	184763300	97.9	0.0123415	234.4	44.4	6.05175	0.984227	1.01812	0.000358461	3126928	2912199	95368	119361	2.20189	1.47002	145	70	40	9162	3107571	4171	42	119	46
00114101174F00BFF2	A	SouthChina	Guangdong	Manchu	Unknown	Male	172641234	17253.8	97.63	96.15	91.06	87.66	41.08	172386467	99.8524	167808866	97.2	0.00880073	200.7	38.4	5.54053	0.984862	0.50703	0.000518522	3114277	2898915	95370	119992	2.20029	1.51192	171	77	42	9313	3094761	6568	33	98	43
00114101174M18BFF2	A	EastChina	Zhejiang	Han	Wu	Female	216924140	21684.2	97.98	97.7	91.24	90.84	40.64	216671255	99.8834	212593968	98	0.0125464	197.1	36.3	6.96748	0.985478	0.977388	2.96866e-08	3158185	2937480	97625	123080	2.19949	1.46989	152	81	39	9355	3138437	6486	38	110	49
00114101181F00BFF2	A	SouthChina	Guangdong	Han	Cantonese	Male	171404342	17128.4	97.92	95.31	91.58	85.89	41.2	171089956	99.8166	163915230	95.6	0.00983244	212.6	41.9	5.4923	0.985245	0.496246	0.00275987	3097282	2883045	94981	119256	2.19812	1.47312	157	70	40	9204	3077946	7345	39	98	43
00114101181M23BFF2	A	SouthChina	Guangdong	Han	Cantonese	Female	249242222	24915.9	97.28	96.25	89.73	87.74	40.98	248673777	99.7719	244526894	98.1	0.0152534	199.7	35.7	7.99377	0.987453	0.983279	0.000282574	3180663	2957967	98020	124676	2.19728	1.49509	158	92	40	9434	3160723	4870	39	113	46
00114101185M23BFF2	A	SouthwestChina	Sichuan	Han	Mandarin	Female	225097258	22500.6	98.23	94.33	92.1	84.8	41.61	224713408	99.8295	220481428	97.9	0.0110878	194.2	34.3	7.21415	0.986301	0.982564	0.00105038	3167056	2949059	96675	121322	2.20051	1.49092	159	71	39	9254	3147505	6933	29	102	46
00114101188M17BFF2	A	SouthChina	Guangdong	Han	Mandarin	Female	230988410	23088.8	98.12	97.37	91.98	89.83	41.22	230749713	99.8967	224526704	97.2	0.012016	202.9	37.7	7.4215	0.986859	0.990573	1.42932e-08	3165901	2946294	96915	122692	2.20089	1.4642	162	72	40	9473	3146037	7181	39	100	46
00114101189F00BFF2	A	NorthChina	Hebei	Han	Unknown	Male	227878618	22775.9	98.05	96.84	91.81	88.75	40.91	227420066	99.7988	221530264	97.2	0.0132168	199	37.9	7.30512	0.992456	0.516261	0.000690068	3147554	2928816	96972	121766	2.19862	1.50886	149	74	48	9303	3128047	8700	33	123	41
00114101189M19BFF2	A	SouthChina	Guangdong	Han	Hakka	Female	215307854	21522.4	98.24	97.27	92.56	90.37	41.14	215066684	99.888	210879226	97.9	0.0190665	193	34.5	6.9158	0.985125	0.984892	4.07363e-08	3146891	2928704	96550	121637	2.2014	1.45553	148	80	39	9348	3127125	5423	35	111	45
00114101191M27BFF2	A	EastChina	Anhui	Han	Mandarin	Female	229936538	22983.4	97.66	96.74	90.84	88.27	41.38	229510110	99.8145	224163650	97.5	0.015793	227.9	47.1	7.37474	0.987586	0.997157	0.00964188	3167671	2947842	97257	122572	2.20065	1.48271	163	77	42	9282	3148077	7333	41	101	43
00114101203F00BFF2	A	SouthChina	Guangdong	Han	Mandarin	Male	194142848	19394.5	97.96	96.39	91.3	87.05	41.83	193774676	99.8104	188946188	97.3	0.0385116	222.4	48.4	6.22001	0.984339	0.497397	1.35012e-06	3122839	2906250	96120	120469	2.19602	1.48612	166	77	43	9390	3103112	6806	36	112	49
00114101203M18BFF2	A	EastChina	Jiangxi	Han	Mandarin	Female	213413760	21335.1	98.2	97.3	91.68	89.85	40.91	213177698	99.8894	209425122	98.1	0.011431	198.5	35.3	6.85529	0.984924	0.974217	4.76182e-08	3163614	2943207	97217	123190	2.19932	1.48247	155	73	42	9280	3144118	6148	37	114	40
00114101204F00BFF2	A	SouthChina	Guangdong	Han	Hakka	Male	192597110	19252.2	97.63	95.51	90.79	86.34	40.99	192249114	99.8193	186757912	97	0.0120782	213.1	43.5	6.17568	0.989088	0.512511	3.41597e-08	3118240	2901918	95578	120744	2.1971	1.47145	157	73	33	9171	3098807	4303	37	108	46
00114101204M16BFF2	A	SouthChina	Guangdong	Han	Hakka	Female	301346392	30113.4	98.39	97.44	92.06	89.61	42.84	300667273	99.7746	293192256	97.3	0.0380403	220.4	42.8	9.66368	0.988453	0.934601	6.98018e-09	3192378	2967032	99355	125991	2.20021	1.49838	163	86	46	9379	3172609	5641	39	112	47
00114101206F00BFF2	A	SouthChina	Guangdong	Han	Cantonese	Male	174711300	17454.9	98.01	95.59	91.89	86.62	41.23	174397672	99.8205	165977264	95	0.0110874	206.2	42	5.59552	0.984917	0.502161	0.000297298	3110890	2896460	95316	119114	2.19875	1.49199	165	72	42	9285	3091363	10893	31	112	47
00114101206M24BFF2	A	SouthChina	Guangdong	Han	Cantonese	Female	164595292	16452.5	98.07	96.81	91.57	88.36	41	164425663	99.8969	161023456	97.8	0.00965607	213.5	41.9	5.28669	0.979608	1.00386	3.80389e-08	3140558	2924060	95664	120834	2.19813	1.4511	139	84	40	9188	3121239	3706	34	98	41
00114101209M21BFF2	A	EastChina	Jiangxi	Han	Gan	Female	213337814	21323.1	97.63	96.47	90.75	87.53	41.05	212827777	99.7609	208398542	97.7	0.0144458	231.6	46.2	6.8395	0.986673	0.973682	0.00103322	3144493	2926426	96501	121566	2.1975	1.45316	149	82	39	9396	3124753	5619	39	109	51
00114101216M20BFF2	A	SouthChina	Guangdong	Han	Cantonese	Female	161951778	16171.5	98.16	97.46	91.2	89.64	45.14	160907363	99.3551	154905764	95.6	0.0317197	197.6	39.1	5.16506	0.936115	0.889243	4.74229e-08	3104329	2891937	94814	117578	2.20343	1.44538	146	85	39	9097	3085002	7840	38	109	45
00114101219M17BFF2	A	SouthChina	Guangdong	Han	Cantonese	Female	155898936	15576.4	98.24	97.11	92.09	89.2	42.69	155457967	99.7171	151141784	96.9	0.0312486	223.7	45	4.99434	0.972562	0.949791	0.000351915	3117454	2904999	94965	117490	2.20416	1.44832	139	79	41	9345	3097802	5669	33	114	51
00114101226M26BFF2	A	CentralChina	Hunan	Han	Xiang	Female	199021488	19887.8	96.99	97.46	90.31	90.18	41.58	198379829	99.6776	193569240	97.3	0.0309164	210.6	41	6.34852	0.984867	0.969047	0.000937496	3130753	2917619	94876	118258	2.20551	1.45653	144	77	51	9273	3111152	8948	40	108	47
00114101229M19BFF2	A	EastChina	Jiangsu	Han	Wu	Female	181871086	18181.6	98.19	97.17	91.61	89.49	41.09	181630478	99.8677	178532012	98.2	0.0104151	203.8	36.3	5.83729	0.981891	0.982809	8.56348e-08	3121385	2907598	94991	118796	2.20188	1.46715	159	78	40	9260	3101942	6548	46	100	44
00114101230F00BFF2	A	SouthChina	Guangdong	Han	Cantonese	Male	217940996	21779.3	97.61	96.8	90.14	88	41.03	217428078	99.7647	213131832	97.8	0.0385227	213.7	43.2	6.98599	0.99051	0.507923	0.000220022	3135183	2917004	96555	121624	2.19925	1.47892	158	82	46	9371	3115502	6214	41	111	45
00114101230M18BFF2	A	SouthChina	Guangdong	Han	Cantonese	Female	223809442	22371.8	98.18	97.17	91.66	89.6	41.16	223505304	99.8641	218837240	97.8	0.0125064	199.1	37.7	7.18437	0.985417	0.969691	9.51015e-05	3165209	2944429	97264	123516	2.19422	1.46455	156	91	46	9210	3145667	5080	36	115	47
00114101246M27BFF2	A	SouthChina	Guangdong	Han	Cantonese	Female	304923986	30471.6	97.06	97.6	90.45	90.53	42.05	303991914	99.6943	296558974	97.3	0.0371013	203.6	38.5	9.72963	0.989106	0.948497	0.000114658	3185693	2962451	98486	124756	2.19732	1.49997	168	86	49	9514	3165742	6402	35	108	44
00114101248M27BFF2	A	SouthChina	Guangdong	Han	Cantonese	Female	213271310	21318.9	97.6	96.29	90.17	87.34	42.11	212336068	99.5615	209060394	98	0.0251506	210.6	39.3	6.82733	0.98505	0.963329	0.00145907	3148365	2931528	95922	120915	2.20043	1.48869	156	70	39	9407	3128633	4764	36	119	52
00114101250M17BFF2	A	CentralChina	Hunan	Han	Mandarin	Female	201131648	20099.2	98.15	97.52	92.14	90.34	41.02	200870420	99.8701	195289594	97.1	0.0134848	198	37.2	6.45826	0.984897	0.993032	1.98534e-08	3049925	2839042	93744	117139	2.20589	1.21904	149	81	51	9156	3030653	5919	30	116	43
00114101251M19BFF2	A	SouthChina	Guangdong	Han	Cantonese	Female	222201930	22210.7	98.21	97.39	91.79	90.25	40.84	221826426	99.831	217174096	97.7	0.0122808	192.1	35.5	7.13232	0.985562	0.988501	0.000341727	3155135	2936482	96719	121934	2.20015	1.45548	150	86	41	9367	3135328	4762	39	108	45
00114101253M19BFF2	A	SouthChina	Guangdong	Han	Cantonese	Female	197553646	19743.3	98.04	96.72	91.42	88.17	41.03	196919944	99.6792	192275680	97.3	0.0160597	226.7	47.7	6.32681	0.985192	0.993306	1.92407e-08	3162020	2943898	96702	121420	2.20127	1.4834	159	84	48	9301	3142469	4336	38	103	43
00114101261M22BFF2	A	SouthChina	Guangdong	Han	Mandarin	Female	226957544	22684.4	98.19	97.2	92.16	89.72	40.95	226526764	99.8102	221298760	97.5	0.00921598	188.5	35.8	7.28079	0.986404	0.990511	0.000239223	3151263	2932914	96611	121738	2.20051	1.45211	144	80	44	9340	3131674	5468	42	111	46
00114101267F00BFF2	A	SouthChina	Guangdong	Han	Cantonese	Male	201761060	20166.7	97.61	95.6	90.75	86.47	41.19	201376020	99.8092	195089598	96.7	0.0122756	209.9	38.7	6.4678	0.989894	0.507393	0.000143456	3124400	2907999	95885	120516	2.19881	1.47338	155	87	41	9246	3104793	5311	36	105	37
00114101267M19BFF2	A	SouthChina	Guangdong	Han	Cantonese	Female	186009060	18594.4	98.15	97.35	91.53	90.07	40.84	185796425	99.8857	182308122	98	0.0110714	200.2	36.4	5.97507	0.982209	0.996653	9.18914e-08	3130635	2913463	96093	121079	2.19765	1.43968	166	77	43	9111	3111385	4843	37	113	43
00114101269F00BFF2	A	SouthChina	Guangdong	Han	Cantonese	Male	202045120	20195.3	98.25	97.55	92.48	90.27	40.81	201814855	99.886	196646748	97.3	0.0234401	206.2	39.1	6.48705	0.99018	0.514444	0.000129394	3100934	2888810	94205	117919	2.19778	1.47396	148	69	41	9130	3081606	6974	34	117	48
00114101269M25BFF2	A	SouthChina	Guangdong	Han	Cantonese	Female	214199224	21412	98.15	97	91.96	89.73	41.06	213721647	99.777	209966242	98	0.00952719	198	35.4	6.87355	0.985697	0.963436	3.05592e-07	3143401	2928061	95715	119625	2.20115	1.44293	165	71	42	9235	3123848	7752	34	108	48
00114101272M18BFF2	A	SouthChina	Guangdong	Han	Cantonese	Female	260052836	25983	98.37	97.57	92.38	89.9	42.88	259332631	99.7231	251005164	96.5	0.0286717	217.6	42.8	8.33331	0.987597	0.934179	7.66568e-05	3177238	2955992	97880	123366	2.20169	1.49525	149	88	50	9437	3157377	6621	34	113	42
00114101277F00BFF2	A	SouthChina	Guangdong	Han	Unknown	Male	220415774	22020.5	97.84	96.51	90.88	87.34	41.9	220062304	99.8396	213428540	96.8	0.0406604	217.7	47.6	7.06214	0.989938	0.499823	8.98593e-11	3136289	2918029	96438	121822	2.20173	1.49533	156	76	44	9411	3116523	8624	40	116	48
00114101277M20BFF2	A	CentralChina	Hunan	Tujia	Xiang	Female	201004022	20094	98.32	98.27	92.62	92.46	41.44	200504426	99.7514	196411004	97.7	0.0159154	192.4	33.8	6.44655	0.983126	0.974154	0.000785527	3158864	2938763	97579	122522	2.20048	1.46821	155	78	39	9427	3139026	6261	34	104	43
00114101278F00BFF2	A	EastChina	Jiangsu	Han	Unknown	Male	159597888	15951.9	97.49	95.61	90.55	86.34	41.2	159257668	99.7868	154220868	96.6	0.00793243	213.7	41.2	5.11548	0.982378	0.506928	4.04956e-08	3098239	2886028	94038	118173	2.19862	1.47126	156	73	44	9219	3078659	6061	34	103	47
00114101278M19BFF2	A	EastChina	Jiangxi	Han	Gan	Female	176521710	17645.8	98.22	97.33	92.14	90.17	40.95	176342670	99.8986	172944418	98	0.0112842	204.4	37.2	5.66785	0.9812	0.941076	9.7848e-07	3142690	2925069	96264	121357	2.2034	1.45249	160	77	45	9277	3123164	5910	36	107	42
00114101283F00BFF2	A	SouthChina	Guangdong	Han	Unknown	Male	223044108	22286.6	97.94	96.68	91.22	87.79	41.77	222537289	99.7728	215529096	96.6	0.0388739	213.6	44.3	7.14732	0.988329	0.489569	7.99133e-05	3135831	2917457	96684	121690	2.20357	1.47663	162	74	46	9411	3115996	6703	41	102	51
00114101283M23BFF2	A	SouthChina	Guangdong	Han	Hakka	Female	200305454	20022.2	98.3	97.47	92.33	90.31	41.52	199675109	99.6853	195598540	97.7	0.00777927	196.9	35.3	6.41946	0.984424	0.979698	0.000275585	3151127	2932433	96646	122048	2.19925	1.47328	169	74	49	9432	3131275	4988	34	108	47
00114101284M25BFF2	A	SouthChina	Guangdong	Han	Cantonese	Female	236626018	23637.8	97.7	97.36	91.27	89.87	41.74	235804639	99.6529	229961266	97.2	0.0178556	200.2	40.5	7.56224	0.986843	0.958294	0.000459833	3175331	2954746	97777	122808	2.20125	1.47605	173	82	50	9354	3155318	4895	40	112	57
00114101289M22BFF2	A	CentralChina	Hunan	Han	Hakka	Female	185826642	18575.9	98.17	97.16	91.49	89.01	41.09	185532909	99.8419	182200238	98	0.00682324	202.3	36.3	5.96419	0.983617	0.96426	0.000270614	3120665	2906450	95367	118848	2.19971	1.45035	161	72	40	9250	3101116	5345	38	102	43
00114101296M18BFF2	A	CentralChina	Hubei	Han	Mandarin	Female	230239416	23010.3	98.49	97.76	92.79	90.4	40.98	229484903	99.6723	222954142	96.8	0.0267578	210.1	39.9	7.37968	0.986512	0.986953	2.69927e-07	3154238	2935986	96911	121341	2.19778	1.45335	161	80	42	9179	3134893	6927	37	113	48
00114101303F00BFF2	A	SouthChina	Guangdong	Han	Mandarin	Male	199204186	19905.8	97.78	96.2	91.4	88.02	41.32	198870730	99.8326	193023872	96.9	0.011879	200.1	37.3	6.38642	0.989756	0.502439	2.71384e-07	3110945	2896372	95036	119537	2.20148	1.48849	149	73	44	9233	3091393	6842	37	105	56
00114101303M18BFF2	A	SouthChina	Guangdong	Han	Mandarin	Female	197475264	19735.7	98.41	97.58	92.43	89.81	42.11	196825803	99.6711	192059992	97.3	0.0272657	220.9	42.7	6.32721	0.983742	0.97871	1.0757e-07	3148087	2929600	96770	121717	2.20054	1.47133	147	85	44	9428	3128262	5531	41	112	50
00114101311M17BFF2	A	SouthChina	Guangdong	Han	Cantonese	Female	229316886	22921.9	98.16	98.05	91.81	91.78	40.9	229111126	99.9103	224872098	98.1	0.0235172	190.3	34.1	7.36529	0.986317	0.981132	1.74361e-08	3151762	2933174	96573	122015	2.19847	1.46746	156	79	43	9293	3132193	5506	35	117	47
00114101317F00BFF2	A	SouthChina	Guangdong	Han	Cantonese	Male	204826702	20473.8	98.29	97.4	92.39	90.04	41.25	204642086	99.9099	197400108	96.4	0.0219649	203.8	38.7	6.57827	0.990124	0.50936	2.90567e-07	3120702	2901865	97037	121800	2.20133	1.45386	178	94	50	9258	3101135	4959	41	105	47
00114101317M24BFF2	A	SouthChina	Guangdong	Han	Cantonese	Female	232832972	23272	98.29	94.77	92.4	85.77	41.38	232376374	99.8039	227027084	97.5	0.00928875	184	33.6	7.46208	0.986822	0.972822	2.35142e-07	3165910	2945169	97119	123622	2.19956	1.47351	168	86	38	9329	3146149	5449	35	121	50
00114101322M19BFF2	A	NorthwestChina	Gansu	Manchu	Mandarin	Female	204195230	20412.3	98.27	97.74	92.07	90.95	41.14	203904253	99.8575	198913846	97.4	0.0199231	194.8	36.5	6.55514	0.984295	0.971083	0.000768964	3155906	2938748	96183	120975	2.19754	1.49439	156	87	47	9288	3136376	7784	35	103	42
00114101327M26BFF2	A	SouthChina	Guangdong	Han	Cantonese	Female	162101952	16197.6	97.97	96.97	91.06	88.64	44.85	161316519	99.5155	156083016	96.3	0.00477975	205.7	39.5	5.18444	0.954671	0.885964	3.63732e-06	3110323	2898484	94501	117338	2.20412	1.4706	145	89	42	9163	3090943	6487	34	105	46
00114108003M25BFF2	A	SouthChina	Guangdong	Han	Cantonese	Female	219710964	21963.6	98.16	98	92.02	91.53	41.17	219529027	99.9172	215269118	98	0.0162454	202.6	36.5	7.05947	0.985539	0.987346	0.000430804	3156146	2937367	96941	121838	2.20072	1.46662	148	87	44	9341	3136516	4674	45	112	39
00114108009F00BFF2	A	SouthChina	Guangdong	Han	Unknown	Male	193141174	19305.8	98.29	96.87	92	88.61	42.58	192545597	99.6916	188655514	97.7	0.0248548	219.2	42.6	6.19042	0.98488	0.499731	0.000406841	3129049	2912482	95982	120585	2.2035	1.51737	159	69	44	9433	3109184	5472	41	106	56
00114108009M27BFF2	A	SouthChina	Guangdong	Han	Hakka	Female	172317288	17226.4	98.17	97.08	91.77	89.07	41.52	172120945	99.8861	168843330	98	0.00667088	206.9	37.1	5.53312	0.981015	0.967429	1.43827e-07	3151485	2933127	96663	121695	2.2029	1.47255	154	85	46	9374	3131826	4583	34	106	49
00114108011M21BFF2	A	SouthChina	Guangdong	Han	Hakka	Female	207034516	20692.8	97.52	96.22	90.36	86.93	41.45	206676210	99.8269	202240038	97.7	0.0138008	237.7	50.2	6.63903	0.986466	0.985434	8.69303e-05	3159351	2940665	96748	121938	2.20292	1.46152	151	77	46	9200	3139913	4876	35	102	48
00114108012M24BFF2	A	SouthChina	Guangdong	Han	Cantonese	Female	199834740	19977.4	98.09	98.05	91.83	91.73	41.92	199423382	99.7942	196141662	98.2	0.0183189	201.1	35.6	6.41403	0.983661	0.978695	0.00293899	3163362	2945847	96392	121123	2.20131	1.49304	157	75	47	9428	3143566	4888	29	105	41
00114108014M25BFF2	A	EastChina	Jiangxi	Han	Gan	Female	192999332	19294	98.03	93.23	91.33	82.42	41.35	192608958	99.7977	189735766	98.3	0.00705896	212.4	38.4	6.18481	0.984957	0.984781	0.000638236	3118345	2904453	94978	118914	2.20187	1.44396	152	77	38	9307	3098768	5545	41	105	49
00114108017M26BFF2	A	SouthChina	Guangdong	Han	Hakka	Female	195323354	19525.2	98.23	97.4	91.68	89.73	40.97	194825854	99.7453	191449186	98	0.0066777	199.3	35.3	6.26467	0.984748	0.9867	0.000111533	3140643	2924723	95918	120002	2.2032	1.47434	156	76	40	9271	3121080	5044	42	96	41
00114109007M18BFF2	A	SouthChina	Guangdong	Han	Cantonese	Female	152195998	15209.4	98.39	97.56	92.38	89.75	42.27	151822136	99.7544	148132886	97.3	0.025326	220.3	42.9	4.87966	0.972371	0.939148	0.000386374	3107672	2896186	94224	117262	2.20166	1.45667	154	79	46	9236	3088114	5102	37	92	39
00114111005M24BFF2	A	SouthChina	Guangdong	Han	Cantonese	Female	177299282	17724.6	98.02	92.28	91.21	80.44	41.28	176990896	99.8261	174364940	98.3	0.00790318	215.5	39.3	5.67906	0.982363	0.98817	0.00014583	3115401	2902704	94347	118350	2.20365	1.43443	147	68	41	9197	3096051	4470	35	98	45
00114111016F00BFF2	A	SouthChina	Guangdong	Han	Mandarin	Male	191494530	19137.5	97.95	96.56	91.45	88.03	41.05	191000130	99.7418	185806192	97	0.012795	207.8	40	6.13429	0.988275	0.503362	3.1673e-07	3110496	2895250	95447	119799	2.19936	1.47722	158	75	47	9081	3091221	4228	38	111	40
00114111016M17BFF2	A	SouthChina	Guangdong	Han	Mandarin	Female	196971888	19689.2	98.19	97.78	91.76	90.96	41.12	196764698	99.8948	192901078	97.9	0.0204308	200.3	36.7	6.32367	0.984042	0.986307	0.0010122	3165256	2945790	97335	122131	2.19882	1.50708	161	70	49	9444	3145417	6323	37	111	51
00114111017F00BFF2	A	SouthChina	Guangdong	Han	Mandarin	Male	206532496	20628.9	98.08	96.97	91.76	88.62	41.58	205895817	99.6917	200384196	97	0.0398794	205.6	43.2	6.60684	0.987095	0.494792	7.20601e-07	3113608	2897631	95767	120210	2.1989	1.46539	165	74	33	9343	3094041	7377	32	108	46
00114111017M26BFF2	A	NorthChina	Neimenggu	Han	Mandarin	Female	234101686	23401.2	97.23	97.36	90.28	89.86	42.14	233699373	99.8281	228662956	97.7	0.011515	196.3	35.5	7.50311	0.986456	0.965342	0.000735375	3172194	2951548	97481	123165	2.19789	1.48925	170	84	49	9344	3152510	8767	39	109	47
00114111023M18BFF2	A	SouthChina	Guangdong	Han	Cantonese	Female	186488998	18634.1	97.69	97.16	90.76	89.28	41.23	185309717	99.3676	182717256	98	0.0196711	219.8	41.9	5.95765	0.983134	0.990687	0.00121657	3132596	2918176	95144	119276	2.20117	1.46518	149	67	38	9257	3113090	4564	29	102	47
00114111032M19BFF2	A	SouthChina	Guangdong	Han	Cantonese	Female	181640882	18155.4	98.12	97.51	92.02	90.22	41.26	181488499	99.9161	175932600	96.9	0.0123027	200.8	37.8	5.83531	0.982866	0.980583	6.10207e-08	3133522	2918981	95222	119319	2.20151	1.44238	150	80	40	9278	3114048	5288	29	118	46
00114111033M26BFF2	A	SouthChina	Guangdong	Han	Min	Female	189544830	18945.4	97.15	97.26	90.08	89.63	41.44	189208959	99.8228	184871202	97.5	0.010832	202.6	38.8	6.07372	0.98378	0.993642	0.000347454	3132345	2917407	95472	119466	2.20065	1.45739	151	80	45	9257	3112818	4644	33	104	51
00114111035M24BFF2	A	SouthChina	Guangdong	Han	Min	Female	214766980	21470.5	97.34	95.78	89.71	86.51	40.97	214122807	99.7001	211119620	98.3	0.018064	225.2	42.4	6.88263	0.986677	0.99102	1.6946e-07	3153024	2934871	96482	121671	2.20071	1.48131	154	78	44	9372	3133367	4587	35	109	43
00114111039F00BFF2	A	SouthChina	Guangdong	Han	Unknown	Male	195836694	19564.7	98.32	96.95	92.23	89.05	41.12	195409213	99.7817	189394292	96.7	0.00944004	205.8	39.8	6.27795	0.98926	0.504147	4.65427e-09	3128253	2911150	96015	121088	2.19953	1.47358	155	81	39	9235	3108591	6242	35	116	48
00114111039M24BFF2	A	SouthwestChina	Chongqing	Han	Mandarin	Female	178434552	17836.2	97.38	96.08	89.64	86.95	41.28	177797131	99.6428	175299258	98.2	0.0255259	225	42.5	5.71456	0.982671	0.991306	2.05441e-08	3142754	2926199	96031	120524	2.19918	1.46307	140	80	51	9331	3122999	5208	36	105	46
00114111047M20BFF2	A	SouthwestChina	Sichuan	Han	Mandarin	Female	177888950	17779.7	98.27	97.37	92.27	90.18	41.62	177485828	99.7734	173729870	97.7	0.0074963	191.8	34.2	5.70317	0.98078	0.962506	1.49187e-08	3130714	2916514	95213	118987	2.19983	1.46047	157	72	41	9277	3111120	6746	33	118	47
00114111060F00BFF2	A	SouthChina	Guangdong	Han	Unknown	Male	192010968	19194.1	97.72	96.07	91.19	87.75	41.09	191641964	99.8078	185580636	96.7	0.0127396	199.5	35.9	6.15655	0.988196	0.514889	0.000204079	3112814	2897780	95263	119771	2.20002	1.46034	148	81	35	9245	3093413	3851	35	113	43
00114111060M16BFF2	A	CentralChina	Hunan	Han	Xiang	Female	221267654	22121	98.13	98.05	91.93	91.67	41	220703756	99.7452	216347090	97.8	0.0152174	203.2	36.3	7.09995	0.98534	0.997169	0.000674731	3167439	2947108	97541	122790	2.19917	1.4809	150	73	39	9296	3147806	6172	39	109	43
00114111070M16BFF2	A	SouthwestChina	Sichuan	Han	Mandarin	Female	236730816	23662.1	98.14	98.16	92.09	91.9	40.67	236410003	99.8645	232050068	98	0.0191717	191.8	34.6	7.60092	0.986622	1.00489	0.000161391	3161624	2942090	97179	122355	2.19657	1.49304	145	77	42	9295	3142018	7961	44	116	50
00114111071M27BFF2	A	CentralChina	Hubei	Han	Mandarin	Female	207744422	20766.3	97.88	97.31	90.92	89.32	40.82	207228404	99.7516	204444276	98.4	0.022901	214.9	39.8	6.6594	0.985785	0.966717	0.000209819	3142694	2924879	96517	121298	2.20018	1.45827	162	72	45	9318	3123083	6309	33	97	46
00114111077F00BFF2	A	SouthChina	Guangdong	Han	Cantonese	Male	229327072	22915.4	98.03	96.63	91.53	87.6	41.42	228654169	99.7066	223914324	97.6	0.0391608	215.8	45	7.34029	0.990766	0.497185	0.00027246	3128629	2910755	96278	121596	2.20021	1.48024	182	87	46	9413	3108829	6906	34	106	44
00114111077M16BFF2	A	SouthChina	Guangdong	Han	Cantonese	Female	211997828	21193.1	97.96	98.01	91.49	91.41	40.93	211583779	99.8047	207749348	98	0.0198408	202.7	36.6	6.80222	0.984736	0.999374	4.16151e-08	3149761	2930565	96782	122414	2.1998	1.45125	148	89	46	9240	3130173	5739	38	105	49
00114111080F00BFF2	A	SouthChina	Guangdong	Han	Unknown	Male	196041920	19595.8	98.16	96.85	91.49	88.43	41.3	195522336	99.735	191949440	97.9	0.022283	225.1	45.1	6.28532	0.989309	0.51006	0.00128325	3127752	2911211	96179	120362	2.19823	1.49678	167	85	51	9288	3108067	4723	36	107	47
00114111080M26BFF2	A	SouthChina	Guangdong	Han	Min	Female	208437766	20835	97.53	96.5	90.19	87.78	41.58	207901335	99.7426	205033484	98.4	0.0219621	207.9	38.2	6.68537	0.985221	0.980767	0.00181064	3152884	2934171	96825	121888	2.19991	1.47864	162	85	46	9345	3133223	4861	38	105	46
00114111081M16BFF2	A	SouthChina	Guangdong	Han	Cantonese	Female	229773284	22970	97.99	97.99	91.52	91.27	40.7	229542143	99.8994	225387586	98.1	0.0175889	203.1	36.1	7.37872	0.986076	0.994278	0.000143851	3171383	2951031	97302	123050	2.19722	1.47187	146	80	48	9429	3151642	5614	36	109	48
00114111084M23BFF2	A	SouthChina	Guangdong	Han	Cantonese	Female	188904876	18881.2	97.98	97.61	91.85	90.78	41.16	188551294	99.8128	184922296	97.9	0.00719265	189	33.4	6.05746	0.982928	0.984402	8.52409e-08	3128122	2913060	95436	119626	2.20061	1.442	153	81	42	9294	3108574	6415	36	117	51
00114111086M17BFF2	A	NorthChina	Hebei	Mongols	Cantonese	Female	190428456	19036.6	98.04	97.95	91.67	91.22	40.67	190028328	99.7899	186507258	97.9	0.0170065	204.4	37	6.11138	0.98312	0.999444	6.19854e-07	3146304	2928619	96628	121057	2.19858	1.49238	160	81	46	9274	3126805	5435	39	96	51
00114111090M16BFF2	A	SouthChina	Guangdong	Han	Cantonese	Female	208158924	20810.1	97.93	97.78	91.36	90.69	41.15	207936851	99.8933	203632894	97.8	0.0185977	208.3	37.6	6.68686	0.984801	0.986631	0.00066429	3134180	2919607	95286	119287	2.20241	1.47272	150	93	43	9225	3114587	7889	34	103	48
00114111093M27BFF2	A	CentralChina	Hunan	Han	Xiang	Female	210378480	21030.6	98.04	97.35	91.4	89.81	41.05	210090866	99.8633	206352552	98.1	0.0260158	203.9	37.3	6.75587	0.985717	0.985917	1.05969e-07	3158905	2940324	96750	121831	2.2008	1.44847	159	75	36	9342	3139141	6232	37	111	56
00114111104M20BFF2	A	EastChina	Jiangxi	Han	Hakka	Female	161449960	16139.1	97.33	96.28	89.94	87.94	41.34	161205929	99.8489	157787140	97.7	0.0135607	197	36.3	5.17936	0.976765	0.957542	0.000270191	3098779	2887160	94238	117381	2.20443	1.42317	133	86	41	9146	3079493	4894	38	108	44
00114111112M18BFF2	A	SouthChina	Guangdong	Han	Mandarin	Female	192717234	19261.9	98.02	96.59	91.27	87.67	41.03	192354964	99.812	188007476	97.6	0.0142116	234.3	47.5	6.18472	0.985208	0.996013	0.000484719	3137436	2923146	95447	118843	2.20082	1.45514	161	73	42	9237	3118012	8757	38	99	44
00114111118M26BFF2	A	SouthChina	Guangdong	Han	Min	Female	208060634	20794.8	97.31	95.76	89.64	86.84	41.02	207669949	99.8122	204923272	98.5	0.0215184	208.5	38.9	6.67559	0.985638	0.97431	0.000285148	3138209	2922038	95870	120301	2.20016	1.4602	154	74	42	9239	3118773	4991	41	112	53
00114111123M26BFF2	A	SouthChina	Guangdong	Han	Cantonese	Female	213649948	21349.4	97.47	96.66	90.28	87.67	41.53	212800767	99.6025	208569364	97.6	0.0141683	226.1	45.2	6.82752	0.986397	0.978627	0.000670846	3144178	2926231	96449	121498	2.20211	1.47519	162	91	50	9411	3124316	4818	43	114	43
00114111132M22BFF2	A	SouthChina	Guangdong	Han	Cantonese	Female	199779730	19970	98.17	93.77	91.85	83.54	41.34	199433296	99.8266	195848626	98	0.00956039	203	37.4	6.40317	0.98501	0.977932	4.00618e-09	3150325	2933925	96202	120198	2.19935	1.46501	146	68	50	9338	3130754	5090	31	96	44
00114111135M24BFF2	A	SouthChina	Guangdong	Han	Cantonese	Female	227901194	22781.8	97.86	97.01	90.75	88.7	40.97	227511059	99.8288	223886264	98.2	0.0274125	215.1	40.3	7.31604	0.98707	0.969481	1.99565e-08	3154810	2936035	96687	122088	2.20112	1.48729	156	84	45	9308	3135112	5296	36	111	49
00114111146M18BFF2	A	SouthChina	Guangdong	Han	Unknown	Female	156303438	15621.1	97.53	96.83	90.22	88.28	40.91	155398854	99.4213	153653564	98.3	0.0180989	236.4	45.9	4.99753	0.977492	1.00168	0.000557023	3115474	2903509	94413	117552	2.20205	1.44196	152	84	49	9254	3095998	3431	33	101	43
00114111147M16BFF2	A	SouthChina	Guangdong	Han	Mandarin	Female	205819952	20575.9	97.87	97.78	91.09	90.66	40.78	205350011	99.7717	201675472	98	0.0164315	210.2	38.6	6.60316	0.984387	1.00258	2.11823e-08	3149383	2931931	96346	121106	2.20203	1.45694	156	71	41	9391	3129641	6041	37	123	48
00114111148M18BFF2	A	SouthwestChina	Sichuan	Han	Mandarin	Female	172451896	17239.7	97.97	97.96	91.44	91.22	41.02	172263894	99.891	169488230	98.3	0.0166057	207.5	37.5	5.53657	0.980285	0.993946	1.63669e-07	3131147	2915919	95637	119591	2.20065	1.43699	171	67	46	9138	3111825	5813	39	113	49
00114111153M19BFF2	A	SouthwestChina	Chongqing	Han	Mandarin	Female	166773694	16671.3	97.88	97.4	91.45	90.11	41.07	166503171	99.8378	163411092	98	0.00609539	200.6	36.4	5.34733	0.980001	0.980261	1.9956e-07	3141629	2926441	95718	119470	2.19888	1.46809	162	82	38	9305	3122081	5309	38	109	51
00114111165F32BFF2	A	SouthChina	Guangdong	Han	Unknown	Male	155952192	15585.3	97.54	95.83	90.78	86.85	41.03	155694899	99.835	150892264	96.8	0.00861732	206.5	40.3	5.00129	0.980004	0.506615	8.14021e-08	3089682	2877390	94418	117874	2.20677	1.44441	144	84	42	9035	3070549	4978	41	104	41
00114111165M16BFF2	A	SouthChina	Guangdong	Han	Min	Female	183769400	18370	97.22	95.99	89.59	87.09	40.99	183249342	99.717	180359284	98.1	0.0132433	204.8	37	5.89033	0.982866	0.962292	0.000470662	3154290	2936707	96247	121336	2.19818	1.46687	153	74	49	9434	3134416	4369	39	117	43
00114111171M26BFF2	A	SouthChina	Guangdong	Han	Cantonese	Female	190254588	19017.1	97.35	95.74	89.77	86.79	42.21	189835202	99.7796	186965148	98.3	0.0214282	207.1	38.1	6.10221	0.982065	0.973686	1.1619e-07	3129953	2915034	95387	119532	2.20044	1.46402	162	76	48	9358	3110292	4705	39	105	47
00114111172M25BFF2	A	SouthChina	Guangdong	Han	Min	Female	235201794	23508.8	97.69	95.54	91.02	85.82	41.14	235029055	99.9266	227492266	96.7	0.0129267	235.6	58.9	7.5569	0.987828	0.996479	1.50624e-07	3155957	2935909	97262	122786	2.20169	1.45121	157	88	46	9251	3136388	5188	34	104	42
00114111173F00BFF2	A	SouthChina	Guangdong	Han	Unknown	Male	205374080	20529.2	97.73	95.85	91.12	87.14	41.24	205027456	99.8312	198537120	96.7	0.0130513	204.8	37.2	6.5857	0.990451	0.506586	8.80012e-08	3098936	2887614	93955	117367	2.20141	1.45202	143	73	45	9219	3079598	6971	34	100	44
00114111173M20BFF2	A	SouthChina	Guangdong	Han	Cantonese	Female	235641060	23557.1	97.18	95.98	89.42	87.11	40.88	235016088	99.7348	230859396	98	0.0139866	204.7	37.2	7.55441	0.987034	0.963732	0.000299937	3149557	2933451	95627	120479	2.19923	1.44962	133	77	42	9227	3130017	8263	32	120	41
00114111180M26BFF2	A	SouthChina	Guangdong	Han	Cantonese	Female	193731700	19366.3	97.5	96.3	90.04	87.21	41.24	193374308	99.8155	190291958	98.2	0.0196748	213.4	40.2	6.21906	0.984679	0.993856	0.000632179	3159202	2941573	96507	121122	2.20371	1.46663	147	83	41	9333	3139660	5054	32	100	50
00114111185M20BFF2	A	SouthChina	Guangdong	Han	Cantonese	Female	204333590	20425.4	97.87	97.35	91.44	90.04	41.16	204098236	99.8848	200009454	97.9	0.00718114	200.7	36.1	6.55624	0.985138	0.948362	0.00227522	3149892	2932948	95989	120955	2.19851	1.45649	167	82	43	9230	3130413	4720	41	116	40
00114111186M19BFF2	A	SouthChina	Guangdong	Buyi	Mandarin	Female	253205122	25309.7	97.8	97.14	91.4	89.45	41.12	252492736	99.7187	246648728	97.4	0.0170212	214.9	40.9	8.11051	0.988076	0.99943	0.000383215	3167671	2948402	96922	122347	2.19913	1.48561	142	86	46	9467	3147749	10346	33	112	47
00114111188M19BFF2	A	SouthChina	Guangdong	Han	Cantonese	Female	198105202	19801.3	97.84	97.17	91.37	89.53	41.18	197807048	99.8495	194289488	98.1	0.00655449	198.2	35.8	6.3553	0.984403	0.980526	0.000226475	3132035	2918860	94821	118354	2.19961	1.43639	156	81	46	9238	3112633	7702	39	114	46
00114111191M24BFF2	A	SouthChina	Guangdong	Han	Cantonese	Female	193090316	19301.1	97.06	94.95	88.81	84.81	41.86	192710966	99.8035	190089934	98.4	0.0202556	225.9	43	6.19421	0.984452	0.968849	3.08523e-08	3139879	2924004	95987	119888	2.20052	1.44098	149	74	49	9415	3120170	5147	41	110	51
00114111196M27BFF2	A	SouthChina	Guangdong	Han	Min	Female	208521876	20842.6	97.89	96.8	91.09	88.45	40.79	207903856	99.7036	204865132	98.2	0.0163055	208.6	38.6	6.6848	0.985407	0.9931	0.000333155	3146527	2929027	96585	120915	2.20124	1.45041	161	76	48	9255	3127004	4566	36	111	43
00114111202M24BFF2	A	SouthChina	Guangdong	Han	Cantonese	Female	202609800	20252.3	97.62	96.55	90.43	88.19	41.75	202021423	99.7096	198909686	98.2	0.0274177	209.3	38.6	6.49494	0.984912	0.966091	0.000306758	3136062	2919858	95846	120358	2.20063	1.43878	163	76	39	9303	3116405	4819	37	111	47
00114111207M24BFF2	A	SouthChina	Guangdong	Han	Min	Female	200628550	20053.3	97.49	96.22	89.99	87.3	41.39	200008969	99.6912	196916292	98.1	0.0278071	217.9	41	6.43083	0.985229	0.966438	0.000457253	3140047	2923469	96004	120574	2.20295	1.42224	152	89	39	9273	3120501	4345	38	113	43
00114111216M17BFF2	A	SouthChina	Guangdong	Han	Hakka	Female	184626092	18455.3	97.66	96.64	90.88	88	40.99	184403868	99.8796	180753622	97.9	0.0131948	202.6	37	5.92638	0.982735	0.98051	0.000826311	3127328	2912664	95374	119290	2.20147	1.45384	152	81	47	9254	3107728	5267	39	111	43
00114111218F00BFF2	A	SouthChina	Guangdong	Han	Cantonese	Male	199221970	19904.1	98.02	96.78	91.7	88.69	40.74	198763639	99.7699	192541658	96.6	0.0139773	201.5	38.8	6.38291	0.989746	0.518811	1.0237e-07	3127966	2910228	96420	121318	2.19741	1.49038	151	82	44	9299	3108420	5218	35	120	45
00114111218M23BFF2	A	SouthChina	Guangdong	Han	Cantonese	Female	191463310	19137.4	97.06	96.96	90.38	88.94	41.19	191283306	99.906	186882028	97.6	0.0121782	224.1	43.8	6.13532	0.983848	0.992473	8.47087e-08	3160764	2941266	97044	122454	2.1966	1.47505	164	84	47	9440	3141022	4135	38	101	44
00114111221M17BFF2	A	SouthChina	Guangdong	Han	Cantonese	Female	201084256	20101.6	98.23	97	92.44	89.61	41.15	200597836	99.7581	196887760	97.9	0.0166603	202	36.8	6.4511	0.983936	0.997215	1.03215e-07	3139526	2926416	95031	118079	2.19714	1.45445	139	80	45	9270	3119973	7455	38	106	47
00114111224M23BFF2	A	SouthChina	Guangdong	Han	Cantonese	Female	215650290	21558	98.07	97.1	91.68	89.3	41.3	215021031	99.7082	211299214	98	0.0086972	197.9	34.8	6.91584	0.985961	0.998334	4.08361e-08	3149337	2931552	96347	121438	2.2019	1.45447	161	84	45	9392	3129555	5178	38	113	44
00114111225M24BFF2	A	SouthChina	Guangdong	Han	Cantonese	Female	184455850	18438.2	98.03	96.88	91.48	88.71	41.16	184142750	99.8303	180984354	98.1	0.00955586	205.5	36.8	5.91841	0.983129	0.977014	3.09967e-07	3138981	2923097	95938	119946	2.1996	1.45374	160	81	46	9380	3119338	5444	38	115	48
00114111226F00BFF2	A	SouthChina	Guangdong	Han	Cantonese	Male	200671184	20055	98.1	96.06	91.73	87.59	41.15	200389569	99.8597	196126132	97.7	0.0165162	225.8	44	6.43638	0.990543	0.504856	0.000316826	3124038	2907169	95919	120950	2.2006	1.47924	153	74	37	9374	3104318	6480	36	107	48
00114111226M18BFF2	A	SouthChina	Guangdong	Han	Cantonese	Female	327573038	32745.7	98	97.73	92	91.27	41.05	326848517	99.7788	320429010	97.8	0.0122047	202.6	36.7	10.4993	0.988608	0.988416	0.000250687	3197980	2972268	99241	126471	2.19988	1.512	165	87	47	9660	3177899	7042	37	107	45
00114111232M20BFF2	A	SouthChina	Guangdong	Han	Cantonese	Female	212496422	21242.6	98.32	97.24	92.72	90.2	40.88	212262390	99.8899	208594034	98.2	0.0164104	198.6	34.9	6.82674	0.985395	0.978528	2.43685e-08	3173065	2953957	96962	122146	2.19805	1.48371	168	80	39	9544	3152999	5087	38	115	46
00114111234M27BFF2	A	SouthChina	Guangdong	Han	Hakka	Female	271000582	27060.5	97.81	96.96	90.95	88.91	43.66	269358505	99.3941	262656720	96.9	0.00696011	217.4	44.3	8.64611	0.98549	0.933136	0.000146814	3173230	2952522	97804	122904	2.20177	1.49681	152	82	46	9528	3153198	8082	36	110	45
00114111235M18BFF2	A	SouthChina	Guangdong	Han	Cantonese	Female	195489656	19541.4	97.8	97.2	91.18	89.47	41.25	195285396	99.8955	192099100	98.3	0.00718248	210.7	38.3	6.27446	0.984918	0.974411	0.000196736	3140364	2924373	95954	120037	2.2007	1.45269	136	91	38	9231	3120870	5181	36	95	49
00114111239M27BFF2	A	SouthChina	Guangdong	Han	Cantonese	Female	185689684	18562.1	97.43	95.1	90.17	85.96	41.06	185346029	99.8149	182563050	98.3	0.0160373	218	40	5.95237	0.984085	0.969566	0.000201334	3135573	2921027	95479	119067	2.19939	1.47023	149	60	50	9189	3116170	4623	31	116	43
00114111246M24BFF2	A	SouthChina	Guangdong	Han	Cantonese	Female	236272062	23614.5	98.46	97.42	92.41	89.84	42.08	235901048	99.843	230579996	97.6	0.0192455	220.8	43.6	7.58453	0.987277	0.959067	2.94797e-07	3161595	2943604	96880	121111	2.20033	1.4454	156	83	42	9406	3141825	8132	43	124	44
00114111250M16BFF2	A	NorthwestChina	Shaanxi	Han	Mandarin	Female	164198230	16411	98.51	97.29	92.18	89.05	40.84	163391441	99.5086	159919574	97.4	0.0253069	232.3	45.4	5.25547	0.980783	0.997666	0.000248385	3122874	2910278	94727	117869	2.1994	1.45724	157	63	45	9039	3103617	7093	33	110	43
00114111259F00BFF2	A	SouthChina	Guangdong	Han	Unknown	Male	245834048	24567.2	98.4	97.18	92.5	89.56	42.06	244868924	99.6074	237897154	96.8	0.0252089	206.3	41.9	7.86336	0.991319	0.495064	0.000527403	3170383	2948621	97999	123763	2.19845	1.51039	176	84	45	9509	3150318	6865	44	103	58
00114111259M16BFF2	A	EastChina	Fujian	Han	Hakka	Female	253031384	25287.2	98.56	97.45	92.46	89.66	41.83	252256322	99.6937	246138704	97.3	0.0283999	223.8	43.5	8.10912	0.98818	0.981923	6.03171e-05	3183444	2959872	98815	124757	2.19957	1.4616	181	86	52	9370	3163677	6269	40	125	45
00114111260M27BFF2	A	SouthChina	Guangdong	Han	Cantonese	Female	205496338	20543.7	97.87	96.64	90.63	87.63	41.09	205301772	99.9053	202079834	98.3	0.0235156	224.1	41.8	6.60352	0.985836	0.988616	0.000968438	3148457	2930435	96795	121227	2.19882	1.46338	149	89	49	9190	3128934	4469	35	105	51
00114111262M27BFF2	A	SouthChina	Guangdong	Han	Mandarin	Female	214997688	21491.2	98.04	97.02	91.2	88.82	41.27	214533252	99.784	211376820	98.3	0.023772	214.5	40.3	6.89923	0.986054	0.9635	0.0013444	3155728	2936922	96999	121807	2.19999	1.48249	157	82	46	9374	3135954	5283	42	100	41
00114111265M16BFF2	A	SouthChina	Guangdong	Han	Cantonese	Female	210935708	21083.5	98.04	97.35	91.83	90.3	41.19	210555259	99.8196	206197172	97.8	0.021025	194.1	34.3	6.76425	0.985468	0.977599	0.000494848	3142939	2924914	96467	121558	2.19895	1.46329	165	67	44	9221	3123430	5437	40	106	45
00114111268M18BFF2	A	SouthChina	Guangdong	Han	Cantonese	Female	213752698	21367.8	98.13	97.44	91.95	89.9	40.97	213593502	99.9255	208674288	97.6	0.0127003	204.6	37.8	6.86986	0.98609	1.00586	5.21225e-07	3163559	2944832	96934	121793	2.20059	1.4761	151	69	40	9360	3143743	4719	34	101	46
00114111269M16BFF2	A	SouthChina	Guangdong	Han	Cantonese	Female	167906490	16780.9	97.58	96.35	90.55	87.28	41.16	167665454	99.8564	164069238	97.7	0.0141215	237.5	49.8	5.38528	0.981902	0.979184	0.0018257	3121809	2908607	94940	118262	2.19887	1.43629	145	76	41	9122	3102526	4738	38	115	44
00114111274M25BFF2	A	SouthChina	Guangdong	Han	Hakka	Female	240176596	24006.7	97.71	96.9	90.82	88.87	40.95	239422337	99.686	235393712	98	0.0258197	195.1	35.2	7.69915	0.987208	0.982317	0.000983695	3176275	2956026	97475	122774	2.19898	1.46651	164	82	48	9318	3156528	5435	41	113	49
00114111278M26BFF2	A	SouthChina	Guangdong	Han	Mandarin	Female	200017576	19995.6	98.03	96.91	91.12	88.45	41.12	199354753	99.6686	196180906	98.1	0.0220345	218.7	41.2	6.41138	0.984917	0.977834	1.00856e-08	3142113	2925179	96158	120776	2.19899	1.46886	151	84	45	9379	3122499	4608	35	121	51
00114111279M17BFF2	A	SouthChina	Guangdong	Han	Cantonese	Female	154375646	15432.3	98.14	97.14	91.87	89.28	41.09	154175995	99.8707	151134988	97.9	0.0069809	206.2	37.3	4.95695	0.976483	0.986927	4.13579e-08	3125004	2912256	94683	118065	2.20163	1.47841	158	81	51	9355	3105349	3930	34	101	50
00114111281M17BFF2	A	SouthChina	Guangdong	Han	Cantonese	Female	191226072	19116.9	98	96.76	91.26	88.08	41.11	191021055	99.8928	187481914	98	0.0076112	221.1	40.5	6.13904	0.98432	0.965191	0.00290917	3135059	2919350	95915	119794	2.19919	1.44266	155	75	43	9319	3115582	5331	36	100	47
00114111283F00BFF2	A	SouthChina	Guangdong	Han	Cantonese	Male	191334816	19051.7	96.89	94.93	88.54	85.89	40.92	189263718	98.9176	183387976	95.8	0.0114754	205.6	40.1	6.07706	0.988991	0.508289	4.26809e-08	3113273	2897785	95461	120027	2.20144	1.47639	159	68	40	9235	3093838	7060	41	113	49
00114111283M26BFF2	A	SouthChina	Guangdong	Han	Cantonese	Female	189146222	18907.6	97.86	96.59	90.94	87.82	41.05	188868624	99.8532	185941146	98.3	0.0147748	214.2	39.5	6.0721	0.98425	0.967764	0.00136873	3163550	2944768	96965	121817	2.1996	1.46982	165	84	38	9344	3143825	4903	41	103	50
00114111284M19BFF2	A	SouthChina	Guangdong	Han	Mandarin	Female	220981600	22089	97.05	96.44	89.58	87.83	41.69	220437413	99.7537	216757074	98.1	0.00683727	198	35.5	7.08519	0.986424	0.973165	0.000775907	3160016	2941643	96861	121512	2.20065	1.48371	152	73	42	9300	3140401	5372	43	107	46
00114111285M26BFF2	A	CentralChina	Hunan	Han	Xiang	Female	182367152	18230.8	97.2	95.57	89.02	85.24	41.62	182071069	99.8376	179892832	98.6	0.0179121	232.3	44	5.85546	0.983658	0.96872	0.000270456	3137875	2922103	95796	119976	2.19949	1.46621	135	78	43	9232	3118461	5800	36	98	49
00114111288F00BFF2	A	SouthChina	Guangxi	Han	Cantonese	Male	168152590	16738.2	96.88	94.95	88.52	85.98	41.08	166069955	98.7615	161612542	96.1	0.0102622	205.9	38.4	5.33362	0.983992	0.510482	6.86524e-08	3098175	2884824	94674	118677	2.20016	1.46234	167	88	41	9215	3078778	4379	36	115	43
00114111288M19BFF2	A	SouthChina	Guangdong	Han	Cantonese	Female	210610802	21055	98.09	93.15	91.5	82.23	41.42	210272596	99.8394	206886144	98.2	0.00818911	206.1	37	6.74793	0.986039	0.994894	0.000361542	3159511	2940620	96717	122174	2.19716	1.45674	148	77	48	9328	3139961	5004	33	116	47
00114111290M17BFF2	A	CentralChina	Hubei	Han	Hakka	Female	259647754	25955.1	98.14	97.28	91.88	89.71	41.25	259374406	99.8947	254003284	97.8	0.00869121	203.8	36.8	8.33441	0.987859	0.962371	0.000326542	3176270	2954625	97954	123691	2.1975	1.48296	161	78	47	9342	3156513	8077	35	111	50
00114111292M16BFF2	A	EastChina	Jiangsu	Han	Mandarin	Female	242047282	24196.4	98.09	97.24	91.74	89.51	41.15	241673355	99.8455	237081948	97.9	0.00897189	206.5	37.4	7.7678	0.987107	0.966585	0.000694006	3181067	2960226	97773	123068	2.20179	1.50481	156	73	42	9452	3161327	7579	30	103	52
00114111301M18BFF2	A	SouthChina	Guangdong	Han	Cantonese	Female	211958640	21187.8	96.91	96.27	89.09	87.3	41.4	211696482	99.8763	208336706	98.3	0.00934451	205.7	37.2	6.80046	0.985502	0.976926	0.000282719	3150624	2932863	96446	121315	2.20157	1.48522	154	75	45	9383	3130850	5043	37	106	49
00114111306M16BFF2	A	SouthChina	Guangdong	Han	Cantonese	Female	187081114	18698.9	98.14	93.12	91.73	82.28	41.64	186645887	99.7674	183404968	98	0.00822254	202.6	36.9	5.98821	0.983383	0.964843	0.000565106	3136603	2921818	95406	119379	2.2008	1.45428	154	81	38	9275	3117074	5030	36	116	48
00114111309M26BFF2	A	EastChina	Anhui	Han	Hui	Female	207065704	20700.1	98.03	96.89	91.14	88.4	41.72	206585257	99.768	203372722	98.2	0.0247761	216.7	40.3	6.64193	0.985243	0.955258	4.44552e-07	3125629	2911544	95115	118970	2.20074	1.45705	151	73	45	9285	3105935	10204	34	103	51
00114111315M17BFF2	A	CentralChina	Hunan	Han	Mandarin	Female	202681074	20262.6	98.16	97.17	91.95	89.36	41.3	202147193	99.7366	197996542	97.7	0.00726557	203.9	36	6.50166	0.984805	0.99097	0.00113953	3149997	2933380	96124	120493	2.19922	1.47254	161	77	41	9297	3130254	5875	36	96	47
00114111321F00BFF2	A	SouthChina	Guangdong	Han	Cantonese	Male	160227302	15948.2	96.66	94.34	87.78	84.5	40.61	158902303	99.1731	156146918	97.5	0.0140319	219.3	48.4	5.08601	0.982565	0.517396	0.000284448	3101519	2887875	95033	118611	2.20239	1.46713	166	81	37	9181	3082086	3891	42	124	40
00114111321M19BFF2	A	SouthChina	Guangdong	Han	Cantonese	Female	201185100	20110.6	97.5	96.36	90.09	87.72	41.91	200755205	99.7863	196991124	97.9	0.0283638	212.1	39.5	6.44877	0.984896	0.956761	0.00041037	3162421	2942165	97466	122790	2.20166	1.48962	164	83	43	9363	3142571	5440	42	115	45
00114111322F32BFF2	A	SouthChina	Guangdong	Han	Unknown	Male	161748288	16169.8	97.54	92.17	89.28	77.61	40.98	161431537	99.8042	158259942	97.8	0.00834701	289.9	61.1	5.18857	0.982902	0.495829	7.64738e-07	3108978	2894194	95458	119326	2.20197	1.49995	152	77	40	9121	3089629	3892	38	112	44
00114111322M22BFF2	A	SouthChina	Guangdong	Han	Min	Female	197032486	19697	97.08	96.66	89.64	88.4	41.33	196718919	99.8409	193520254	98.2	0.00784015	195.9	34.3	6.32098	0.984039	0.982006	3.03042e-07	3143759	2926092	96282	121385	2.19708	1.43935	152	90	51	9273	3124096	4131	35	108	41
00114111327F00BFF2	A	CentralChina	Hubei	Han	Mandarin	Male	205499404	20536	97.89	96.18	91.19	86.99	41.09	204945725	99.7306	196544040	95.6	0.0117435	214.2	43.2	6.57702	0.990583	0.49948	0.000516159	3127027	2908744	96637	121646	2.20502	1.48204	154	79	45	9369	3107376	8728	33	106	38
00114111327M25BFF2	A	CentralChina	Hubei	Han	Mandarin	Female	213951982	21387.4	98.11	97.27	91.52	89.54	41.55	213661937	99.8644	210207194	98.2	0.0252437	205.6	37.9	6.87107	0.985651	0.983824	0.000531528	3166176	2945349	97605	123222	2.20038	1.47181	151	81	51	9399	3146503	6659	33	118	43
00114111332M25BFF2	A	SouthwestChina	Yunnan	Han	Mandarin	Female	245468992	24528.6	98.41	97.78	92.75	91.35	41.13	245237613	99.9057	238998400	97.4	0.0229668	170.3	31.2	7.87859	0.986247	0.959282	0.00181355	3181952	2960272	97599	124081	2.20121	1.50216	161	78	42	9433	3162118	9434	41	109	46
00114111333M27BFF2	A	SouthChina	Guangdong	Han	Hakka	Female	201015130	20095.1	97.78	96.2	90.62	86.67	40.86	200719241	99.8528	197779080	98.4	0.0147852	221.9	40.9	6.45313	0.985695	0.975284	0.000127103	3147784	2930583	96237	120964	2.20228	1.47671	158	72	42	9304	3128110	5069	42	102	46
00114111346F00BFF2	A	CentralChina	Hubei	Han	Unknown	Male	230854152	23076.7	98.18	96.52	91.56	87.7	40.93	230567198	99.8757	221728104	96	0.0111904	225.1	43.4	7.40933	0.993323	0.51551	7.31063e-09	3113639	2896097	96273	121269	2.19951	1.4634	156	81	40	9244	3094245	7873	37	99	51
00114111346M16BFF2	A	CentralChina	Henan	Han	Mandarin	Female	215260458	21514.5	98.2	97.47	92.19	90.33	41.38	214786102	99.7796	210557774	97.8	0.00768446	194.8	35.4	6.90428	0.98544	0.986824	0.00158365	3164183	2943868	97575	122740	2.19849	1.46263	140	84	44	9395	3144377	7436	43	107	45
00114111348F00BFF2	A	SouthChina	Guangdong	Han	Cantonese	Male	201121222	20099.1	98.11	96.36	91.45	86.96	41.84	200704467	99.7928	194067342	96.5	0.0372186	224	48	6.44634	0.983949	0.487734	0.000565403	3133086	2915575	96148	121363	2.20086	1.48324	155	90	41	9437	3113229	6608	35	108	54
00114111348M17BFF2	A	SouthChina	Guangdong	Han	Cantonese	Female	187161474	18708.3	98.19	97.42	92.1	90.05	41.19	186966626	99.8959	183041474	97.8	0.00849975	200.8	35.4	6.00595	0.983544	0.988629	0.000444931	3152352	2933765	96705	121882	2.19761	1.43885	174	75	40	9242	3132796	5298	36	107	41
00114111349F00BFF2	A	SouthChina	Guangdong	Han	Unknown	Male	192419712	19228.7	97.93	96.36	91.32	87.4	41.01	192097336	99.8325	185784464	96.6	0.0121188	210.8	42	6.17175	0.988746	0.505882	5.23329e-08	3112142	2898279	95180	118683	2.20014	1.45696	161	75	48	9180	3092723	6357	45	104	49
00114111349M19BFF2	A	SouthChina	Guangdong	Han	Hakka	Female	201720626	20166.2	96.79	96.32	88.86	87.45	41.61	201413261	99.8476	197759354	98	0.00866441	204.7	35.9	6.47334	0.984745	0.981827	0.000329044	3150828	2933040	96348	121440	2.19827	1.47279	147	78	47	9322	3131142	5351	41	115	42
00114111357M25BFF2	A	SouthChina	Guangdong	Han	Cantonese	Female	178722224	17866	97.69	97.1	90.61	88.97	41.71	178554120	99.9059	175917382	98.4	0.024595	217.2	40.4	5.72985	0.982265	0.967698	4.6857e-07	3123362	2909415	95050	118897	2.20027	1.43264	161	87	50	9321	3103778	4420	36	115	44
00114111359M26BFF2	A	SouthChina	Guangdong	Han	Cantonese	Female	159463342	15916.5	97.66	96.83	89.91	88.11	45.41	158567582	99.4383	149068830	93.5	0.00560219	210.6	44.4	5.07952	0.948427	0.864476	6.98679e-07	3114451	2902345	94777	117329	2.2037	1.45699	170	80	50	9205	3094889	13489	37	115	53
00114111360M27BFF2	A	SouthChina	Guangdong	Han	Cantonese	Female	202889224	20282	97.53	95.33	90.56	86.51	41.06	202617881	99.8663	199036202	98.1	0.0172496	208.3	37.9	6.50837	0.985437	0.970968	0.000625515	3132247	2916712	95766	119769	2.20022	1.44986	180	83	37	9059	3112987	4639	29	112	48
00114111361M26BFF2	A	SouthChina	Guangdong	Han	Cantonese	Female	199733160	19959.4	98.04	97.13	91.7	89.44	41.95	199018427	99.6422	194725072	97.5	0.0143141	222.8	45.9	6.39678	0.984482	0.979151	0.000399632	3144780	2928221	96089	120470	2.20041	1.4672	156	99	43	9346	3125071	2473	44	110	47
00114111365F00BFF2	A	SouthChina	Guangdong	Han	Cantonese	Male	220887008	22071.7	97.63	96.88	90.92	88	41.33	220265769	99.7188	215840698	97.7	0.0269811	208.6	43.1	7.06605	0.990375	0.505055	0.000824614	3140803	2921526	96957	122320	2.19933	1.47453	160	76	40	9296	3121229	5095	40	116	49
00114111365M24BFF2	A	SouthChina	Guangdong	Han	Cantonese	Female	207609634	20753.8	97.77	96.44	90.64	87.37	40.95	207208448	99.8068	204113294	98.3	0.01468	216.3	40	6.66272	0.98603	0.984957	0.00254032	3172141	2950848	97823	123470	2.20055	1.49112	162	83	45	9439	3152241	4740	39	114	43
00114111369M25BFF2	A	SouthChina	Guangdong	Han	Cantonese	Female	247848110	24775.5	98.14	96.71	92.24	88.52	40.89	247669247	99.9278	241256690	97.3	0.0129822	217	40.5	7.9665	0.987753	1.01641	0.00103888	3170837	2950374	97619	122844	2.20037	1.47477	153	87	42	9495	3150870	5393	40	108	47
00114111372F00BFF2	A	SouthChina	Guangdong	Han	Cantonese	Male	221403228	22126.3	98.26	96.14	91.94	86.75	41.59	220651021	99.6603	211070036	95.3	0.0163182	224.7	48.7	7.08223	0.991774	0.491016	7.88358e-05	3109335	2895023	95136	119176	2.20099	1.44427	155	77	41	9212	3089990	9715	37	111	51
00114111372M20BFF2	A	SouthChina	Guangdong	Han	Cantonese	Female	226471940	22637.7	97.07	96.67	89.63	88.44	41.49	226072034	99.8234	221977560	98	0.00793366	190.9	33.2	7.26519	0.98678	0.962898	0.000440283	3143792	2928308	95651	119833	2.19632	1.45238	153	81	53	9473	3123964	8259	40	102	46
00114111373M26BFF2	A	SouthChina	Guangdong	Han	Cantonese	Female	199617244	19955.5	97.94	96.75	90.82	87.99	41.39	199330750	99.8565	196506392	98.4	0.0230892	223.3	41.7	6.4093	0.984973	0.975748	0.000841835	3135626	2919041	95982	120603	2.20282	1.46966	147	65	44	9191	3116161	4777	38	115	53
00114118002M27BFF2	A	SouthChina	Guangdong	Han	Cantonese	Female	198548306	19846.8	97.2	95.54	89.35	86.28	41.65	198273845	99.8618	195235224	98.3	0.0216153	212.2	39.6	6.37368	0.984479	0.962366	5.34588e-07	3139990	2923771	96074	120145	2.20354	1.4592	168	83	43	9311	3120344	5306	36	122	44
00114119002M23BFF2	A	SouthChina	Guangdong	Han	Cantonese	Female	222471334	22236.4	97.76	97.47	91.47	90.16	41.92	221474941	99.5521	215812676	97	0.0182639	196.8	37.1	7.10384	0.985652	0.981761	0.000330581	3151724	2933503	96600	121621	2.19908	1.45876	167	78	49	9359	3131997	4786	33	98	46
00114121011M16BFF2	A	NortheastChina	Jilin	Han	Mandarin	Female	184207858	18413.7	98.14	97.02	91.75	89.02	41.41	183954766	99.8626	180429318	97.9	0.00706569	199.3	36.1	5.91356	0.982267	0.974826	1.11008e-07	3139339	2923276	95839	120224	2.20422	1.48088	158	86	50	9259	3119827	7711	40	102	48
00114121012M25BFF2	A	SouthChina	Guangdong	Han	Cantonese	Female	212587248	21250.2	97.47	96.58	90.28	87.43	41.56	212272960	99.8522	208138212	97.9	0.0145642	231.2	47.5	6.81203	0.986018	0.978046	0.000285025	3152578	2935283	96162	121133	2.19886	1.44125	147	78	47	9385	3132751	5032	35	106	48
00114121016M18BFF2	A	SouthChina	Guangdong	Han	Cantonese	Female	166427750	16635.4	98.27	97.35	92.27	90.05	41.53	166230974	99.8818	162895798	97.9	0.00778315	190	33.6	5.34102	0.978119	0.969435	2.95565e-08	3128262	2914920	94746	118596	2.19873	1.45964	165	78	44	9159	3108806	5026	37	118	39
00114121020M25BFF2	A	SouthChina	Guangdong	Han	Cantonese	Female	191299012	19123.2	97.38	95.08	90.02	85.92	41.11	190855716	99.7683	187513040	98	0.0158361	215.8	39.9	6.13043	0.984939	0.964861	5.55915e-08	3137085	2922639	95182	119264	2.19801	1.46995	155	82	44	9249	3117675	4570	29	113	46
00114121022M25BFF2	A	NortheastChina	Jilin	Han	Mandarin	Female	204616878	20453.7	98.05	96.87	91.22	88.37	41.2	204239123	99.8154	201191964	98.3	0.0226146	214.5	40.4	6.5683	0.98574	0.98118	0.000471404	3140457	2923544	96374	120539	2.19991	1.47088	157	78	37	9311	3120897	7896	44	103	47
00114121026F00BFF2	A	SouthChina	Guangdong	Han	Cantonese	Male	188077390	18796	97.72	96.35	90.87	87.24	41.06	187694959	99.7967	183916352	97.8	0.0321976	226.6	48.2	6.02744	0.987292	0.513437	1.73333e-07	3136417	2919491	96369	120557	2.19599	1.50415	156	85	36	9293	3116667	5166	36	101	45
00114121026M19BFF2	A	SouthChina	Guangdong	Han	Cantonese	Female	192377314	19229.7	96.92	96.37	89.18	87.59	41.14	192112562	99.8624	189005102	98.2	0.00774114	205.1	37.4	6.17346	0.984405	0.987987	0.00058193	3154206	2936364	96554	121288	2.19966	1.47313	156	72	46	9374	3134484	5074	32	116	42
00114121028M17BFF2	A	SouthChina	Guangdong	Han	Min	Female	228592232	22850.1	98.21	97.14	91.87	89.2	41.27	228302831	99.8734	223744964	97.9	0.00782779	209.7	38	7.33709	0.987339	0.975034	0.000695678	3152288	2933420	96698	122170	2.19999	1.48	177	74	46	9353	3132642	5379	39	115	49
00114121029M20BFF2	A	EastChina	Anhui	Han	Mandarin	Female	215442090	21535.7	97.57	96.54	90.34	88.18	41.62	214756734	99.6819	211320490	98.1	0.0292763	208.4	38.2	6.90251	0.985997	0.967044	0.00666705	3168344	2949644	96749	121951	2.19908	1.48777	144	81	41	9384	3148701	7401	44	114	44
00114121038M24BFF2	A	EastChina	Anhui	Han	Mandarin	Female	274086772	27359.9	97.87	96.94	91.24	89.01	44.42	272565477	99.445	257877126	94.1	0.00875945	208.8	44	8.73718	0.986777	0.885545	0.000795609	3175677	2954909	97949	122819	2.20109	1.48843	160	87	47	9530	3155805	12998	29	104	44
00114121039M25BFF2	A	SouthChina	Guangdong	Han	Cantonese	Female	230936060	23084.7	98.15	97.23	91.6	89.42	41.11	230323178	99.7346	226764450	98.2	0.0258696	207.1	38.1	7.40926	0.986544	0.969776	0.000106147	3160265	2940831	97149	122285	2.19988	1.46428	153	79	43	9432	3140460	5774	37	119	48
00114121042M16BFF2	A	SouthChina	Guangdong	Han	Cantonese	Female	213619896	21352.3	97.95	93.1	91.29	82.28	41.59	213182095	99.7951	209583036	98.1	0.0073195	201.9	36.4	6.83841	0.986295	0.986029	2.31368e-08	3168109	2950221	96553	121335	2.1983	1.49721	157	78	45	9331	3148477	5128	28	115	44
00114121045M25BFF2	A	SouthChina	Guangdong	Han	Cantonese	Female	208807826	20863.3	98.12	97.02	91.89	89.07	41.71	208497167	99.8512	203979896	97.7	0.0148896	225.3	46.2	6.70061	0.986168	0.964217	0.000453913	3151353	2933196	96619	121538	2.20067	1.45912	158	85	44	9504	3131492	4506	41	116	47
00114121047F00BFF2	A	SouthChina	Guangdong	Han	Hakka	Male	198402310	19829.9	97.99	96.54	91.49	87.88	40.75	198008082	99.8013	192169888	96.9	0.0135494	209.1	40.7	6.36258	0.989866	0.509893	1.0071e-07	3122078	2905829	95752	120497	2.20163	1.47958	156	90	37	9158	3102774	4856	41	110	47
00114121047M25BFF2	A	SouthChina	Guangdong	Han	Hakka	Female	204821518	20474	97.66	97.1	90.47	88.84	41.48	204529514	99.8574	201784570	98.5	0.0247563	218.5	40.6	6.56682	0.985239	0.964301	0.000702143	3159861	2940774	97124	121963	2.19704	1.47249	143	69	46	9378	3140202	5075	39	103	53
00114121052M21BFF2	A	CentralChina	Hunan	Han	Xiang	Female	211713934	21150.1	98	97.51	91.35	89.68	42.03	210911608	99.621	206349320	97.5	0.015563	209.9	40.8	6.77528	0.985919	0.953516	7.01871e-07	3155491	2937098	96847	121546	2.20098	1.4695	174	81	42	9272	3135887	7908	36	113	50
00114121055F00BFF2	A	SouthChina	Guangdong	Han	Mandarin	Male	189877012	18976.8	97.9	96.31	91.2	87.31	41.14	189533762	99.8192	182829502	96.3	0.0121843	213.7	43	6.08931	0.988579	0.508268	1.39618e-08	3104272	2888894	95483	119895	2.20225	1.47435	178	77	41	9201	3084877	5993	37	116	43
00114121055M26BFF2	A	SouthwestChina	Sichuan	Han	Mandarin	Female	215508790	21543.8	97.91	96.39	90.77	87.31	41.56	215098842	99.8098	211706428	98.2	0.0190417	209.1	38.6	6.91806	0.985967	0.979751	0.00031722	3152202	2933018	96711	122473	2.19897	1.46404	154	80	41	9365	3132518	7193	40	102	48
00114121065M17BFF2	A	SouthChina	Guangdong	Zhuang	Mandarin	Female	190706424	19061	98.24	97.41	92.24	90.19	41.22	190402376	99.8406	186814976	98	0.00799076	188.1	33.4	6.12121	0.982805	0.966142	0.00207894	3145229	2929127	95833	120269	2.19965	1.43801	158	84	36	9292	3125525	5421	40	104	46
00114121068M16BFF2	A	SouthChina	Guangdong	Han	Cantonese	Female	173411730	17334.5	98.29	97.28	92.37	89.84	41.39	172874321	99.6901	169465638	97.7	0.00743621	188.4	32.8	5.55986	0.979104	0.993426	0.000320006	3102092	2892305	93674	116113	2.20365	1.40291	142	82	39	9090	3082918	6481	42	107	49
00114121073M26BFF2	A	SouthChina	Guangdong	Han	Cantonese	Female	173955216	17382.5	98.19	97.06	91.87	89.27	41.51	173092263	99.5039	169416746	97.4	0.00657697	219.2	43	5.56481	0.980391	0.956982	1.9215e-07	3125080	2911871	94738	118471	2.19787	1.46269	156	80	38	9291	3105664	4278	35	101	48
00114121078M22BFF2	A	SouthChina	Guangdong	Han	Cantonese	Female	196391996	19631.7	97.45	95.95	89.84	86.61	41.14	195762466	99.6795	193069172	98.3	0.025	222.1	42.2	6.29404	0.985485	0.976776	0.00169272	3150109	2933091	96365	120653	2.1979	1.48438	170	83	44	9320	3130431	5276	35	119	49
00114121079F00BFF2	A	SouthChina	Guangdong	Zhuang	Cantonese	Male	230917256	23079.9	98.26	96.79	91.92	88.53	41.47	230618112	99.8705	219703064	95.1	0.012563	214.8	41.5	7.4102	0.99261	0.502197	4.52131e-08	3159000	2937799	97854	123347	2.20083	1.48446	173	72	43	9416	3139202	8810	37	105	46
00114121079M18BFF2	A	SouthChina	Guangdong	Han	Cantonese	Female	189184382	18906.7	98.15	96.62	91.34	87.87	41.55	187978063	99.3624	185761402	98.2	0.0227636	231.9	43.8	6.04547	0.983104	0.995864	5.72442e-07	3163015	2944358	97148	121509	2.19857	1.45949	157	82	46	9368	3143341	4801	35	104	50
00114121091M23BFF2	A	CentralChina	Hunan	Han	Xiang	Female	209811308	20973	97.94	97.33	91.24	89.46	41.4	209506827	99.8549	206460522	98.4	0.0245724	209.5	38.3	6.72913	0.985943	0.966635	0.000765264	3121660	2905850	95792	120018	2.20395	1.39385	149	81	45	9203	3102117	6354	41	124	46
00114121092M17BFF2	A	SouthChina	Guangdong	Han	Cantonese	Female	157532586	15746.3	98.18	97.08	91.89	89.18	41.13	157266055	99.8308	154420032	98	0.00707058	200.9	36.4	5.05592	0.977321	0.980566	0.000440918	3108680	2896317	94359	118004	2.19884	1.42799	151	72	48	9103	3089593	4106	44	107	45
00114121095M23BFF2	A	SouthChina	Guangdong	Han	Cantonese	Female	237458860	23738.2	98	96.29	91.77	87.55	41.05	237292562	99.93	229901568	96.8	0.0126239	224.6	45.7	7.63332	0.987584	1.00848	0.000403744	3169629	2949664	97419	122546	2.19896	1.47664	166	83	48	9400	3149886	5241	42	108	49
00114121099M24BFF2	A	SouthChina	Guangdong	Han	Cantonese	Female	179481600	17938.1	98.2	97.16	91.94	89.56	41.66	178458919	99.4302	174128902	97	0.00642826	213.6	40.9	5.73873	0.981293	0.953089	1.12501e-08	3128996	2915277	94950	118769	2.20043	1.48843	145	75	42	9167	3109569	4349	39	95	49
00114121101M20BFF2	A	SouthChina	Guangdong	Han	Cantonese	Female	208229826	20814.8	97.44	96.17	89.8	87.1	40.88	207767470	99.778	204871928	98.4	0.028845	224.3	42.2	6.67947	0.98613	0.982307	1.07813e-07	3158051	2940590	96485	120976	2.19904	1.46522	152	69	41	9394	3138245	4288	32	121	53
00114121105M24BFF2	A	CentralChina	Hunan	Han	Xiang	Female	169747386	16967.6	97.8	95.89	90.3	85.97	41.28	169115006	99.6275	166633206	98.2	0.0166641	222	40.7	5.43928	0.980804	0.98149	0.000856798	3130298	2915511	95514	119273	2.20132	1.44496	167	73	45	9286	3110623	4866	35	123	48
00114121110M24BFF2	A	SouthChina	Guangdong	Han	Cantonese	Female	178057556	17795.8	98.1	96.91	91.77	88.81	41.64	177727568	99.8147	173770332	97.6	0.0121202	227.6	46.4	5.71381	0.982371	0.980878	7.66062e-08	3142212	2926762	95815	119635	2.20093	1.47863	162	74	42	9295	3122664	4535	42	100	44
00114121123M24BFF2	A	SouthChina	Guangdong	Han	Cantonese	Female	201822298	20173.4	98.08	97.03	91.76	89.14	41.67	201531143	99.8557	196972128	97.6	0.013282	220.8	44	6.47878	0.985278	0.983316	0.000311897	3160969	2943521	96605	120843	2.2003	1.47512	159	67	49	9372	3141253	4858	36	104	43
00114121124M20BFF2	A	SouthChina	Guangdong	Han	Cantonese	Female	199178378	19902.8	98.08	96.32	91.34	87.55	41.62	198937235	99.8789	191797258	96.3	0.0107706	209.7	41.7	6.39179	0.984276	0.970759	0.000393195	3140192	2923975	95702	120515	2.19914	1.47046	165	76	49	9311	3120639	9052	39	123	47
00114121125M19BFF2	A	SouthChina	Guangdong	Han	Cantonese	Female	195629028	19553	98.15	97.2	91.93	89.54	41.3	195402293	99.8841	190864222	97.6	0.0115914	205.1	38.4	6.28157	0.983942	0.990134	0.000582987	3147385	2930233	96215	120937	2.19788	1.46437	152	76	47	9271	3127845	4873	40	101	53
00114121129M17BFF2	A	SouthChina	Guangdong	Han	Min	Female	154475550	15442	98.16	96.98	91.81	88.9	41.28	154246805	99.8519	151339414	98	0.00638242	202.9	36.6	4.95974	0.977003	0.973992	4.04995e-08	3105722	2893665	94414	117643	2.19958	1.45868	149	81	43	9229	3086286	4235	35	103	42
00114121134M17BFF2	A	CentralChina	Hunan	Han	Xiang	Female	211243996	21116.4	98.05	96.98	91.62	89	41.6	210957071	99.8642	206533814	97.8	0.0100251	202.5	37.7	6.7812	0.985247	0.983501	0.00020775	3157503	2939667	96617	121219	2.20586	1.46355	162	78	48	9539	3137608	6410	34	108	41
00114121140M19BFF2	A	SouthChina	Guangdong	Han	Min	Female	164622570	16447.5	97.34	96.71	90.36	88.39	43.08	163857385	99.5352	158908932	96.5	0.0345311	217.7	43	5.24158	0.975361	0.941925	0.000400675	3081491	2873945	93086	114460	2.20338	1.43373	143	76	44	9111	3062299	7180	35	111	46
00114121143F28BFF2	A	SouthChina	Guangdong	Han	Cantonese	Male	228335722	22824.2	98.22	96.7	91.77	88.22	41.11	228069670	99.8835	218810564	95.8	0.0136266	215.1	41.4	7.3298	0.992581	0.502907	0.000714533	3141493	2922620	96774	122099	2.1996	1.50855	176	69	45	9335	3121760	6468	45	125	44
00114121143M23BFF2	A	SouthChina	Guangdong	Han	Cantonese	Female	266383444	26626.3	96.71	94.04	88.79	83.41	41.46	265757948	99.7652	259469180	97.4	0.00699217	227	43.5	8.52854	0.988436	0.990418	0.000461384	3182360	2961573	97589	123198	2.20081	1.48784	158	76	43	9533	3162345	6033	33	110	52
00114121144M22BFF2	A	SouthwestChina	Guizhou	Buyi	Mandarin	Female	176876176	17679.3	97.72	97.16	90.52	88.76	42.07	176653276	99.874	174242264	98.5	0.0234782	226.2	43.3	5.67134	0.981306	0.969306	0.000918276	3131974	2917615	95214	119145	2.20199	1.45836	160	77	41	9362	3112279	5789	38	106	51
00114121146M24BFF2	A	EastChina	Jiangxi	Han	Mandarin	Female	168935618	16879.1	97.86	97.02	91.13	89.12	44.07	167808236	99.3327	163480188	96.8	0.00637993	215.5	41.1	5.38718	0.960901	0.933444	1.65382e-07	3134767	2921240	95269	118258	2.20257	1.46114	159	75	37	9233	3115164	5986	43	109	45
00114121150M16BFF2	A	SouthChina	Guangdong	Han	Cantonese	Female	207621748	20755.2	97.1	96.64	89.68	88.32	41.21	207055062	99.7271	203555728	98	0.00809781	196.4	34.8	6.65337	0.985362	0.973389	3.11964e-08	3166410	2948594	96588	121228	2.19911	1.49868	142	78	46	9386	3146718	4341	37	111	47
00114121151M26BFF2	A	SouthChina	Guangdong	Han	Cantonese	Female	244643226	24452.8	98.03	97.22	91.68	89.74	41	244095246	99.776	239877316	98.1	0.0187578	193.3	34.8	7.84623	0.987525	0.963242	4.70034e-08	3163590	2943750	97004	122836	2.19913	1.48158	153	74	36	9483	3143741	5273	35	111	48
00114121161M17BFF2	A	SouthChina	Guangdong	Han	Hakka	Female	190705760	19060.4	97.49	96.23	90.27	87.8	41.63	190323900	99.7998	187299276	98.2	0.0194535	212	39.2	6.11418	0.984042	0.984144	0.00114901	3128229	2913382	95449	119398	2.20095	1.45265	168	74	45	9299	3108758	5135	36	114	46
00114121163M20BFF2	A	CentralChina	Hubei	Han	Mandarin	Female	216591578	21651	97.17	95.44	89.24	85.67	42.09	215916935	99.6885	213064172	98.4	0.0168558	233.6	44.4	6.9412	0.98647	0.967011	0.000443633	3154587	2937139	96589	120859	2.19927	1.45972	152	75	41	9375	3134878	8042	38	104	46
00114121164M17BFF2	A	SouthwestChina	Yunnan	Yi	Mandarin	Female	215993668	21590.1	97.39	97.01	90.25	89.06	41.22	215698031	99.8631	211885270	98.1	0.00946186	195.4	34.7	6.93106	0.985773	0.976816	0.000586634	3158142	2940332	96576	121234	2.19614	1.49634	150	74	49	9456	3138447	7881	41	107	45
00114121166M27BFF2	A	CentralChina	Hunan	Han	Xiang	Female	171234004	17118.1	97.47	95.37	90.34	86.61	40.95	170771292	99.7298	167980986	98.1	0.0167598	212.4	39.2	5.4881	0.981491	0.984534	0.000213779	3124359	2911319	94877	118163	2.20275	1.46019	132	67	42	9051	3105130	4596	38	104	51
00114121168M22BFF2	A	SouthChina	Guangdong	Han	Cantonese	Female	232755298	23261.3	98.25	97.36	92.18	90.2	41.4	230920674	99.2118	225191258	96.8	0.00752103	206.1	39.1	7.42396	0.986057	0.972266	0.000206987	3157683	2941094	95976	120613	2.20137	1.48846	152	73	41	9349	3138006	8706	36	104	46
00114121170M25BFF2	A	SouthChina	Guangdong	Han	Cantonese	Female	189401456	18933.3	97.81	96.32	90.75	87.06	40.95	189025476	99.8015	186306334	98.4	0.0133151	216.3	40.1	6.07837	0.984344	0.978202	0.00179291	3144496	2928537	95858	120101	2.19976	1.46884	153	85	39	9194	3125056	4542	41	105	42
00114121172M25BFF2	A	SouthChina	Guangdong	Han	Min	Female	204258934	20419	97.38	95.39	90.07	86.56	41.06	204021298	99.8837	200442526	98.1	0.0178503	212.1	39	6.55415	0.985309	0.980598	9.06343e-08	3159675	2941843	96504	121328	2.19879	1.47595	151	77	42	9330	3140145	4694	41	95	54
00114121186M18BFF2	A	SouthChina	Guangdong	Han	Cantonese	Female	268947160	26854.7	96.91	97.06	89.82	89.05	44.55	267291487	99.3844	256730572	95.5	0.0343684	217.9	45.4	8.53965	0.981057	0.912991	3.64053e-08	3125342	2907299	96669	121374	2.20577	1.37534	170	86	48	9295	3105824	7805	33	117	45
00114121188M18BFF2	A	SouthChina	Guangdong	Han	Min	Female	208843824	20877.8	97.19	96.78	89.64	88.39	41.34	208559645	99.8639	204896954	98.1	0.00826101	204.5	36.8	6.70355	0.985893	0.976985	6.73736e-08	3140075	2924972	95408	119695	2.20095	1.4545	150	83	45	9504	3120239	7159	37	100	45
00114121190F00BFF2	A	CentralChina	Hubei	Han	Mandarin	Male	240842770	24072.1	98.23	96.64	91.81	88.11	41.44	240468445	99.8446	229474822	95.3	0.0118933	219.6	43.6	7.72562	0.993441	0.498227	6.05684e-08	3145156	2924252	97557	123347	2.20076	1.48125	157	84	49	9411	3125434	8300	42	106	40
00114121190M17BFF2	A	CentralChina	Hubei	Han	Mandarin	Female	223625820	22353.9	97.33	96.97	90.17	89.09	42.36	223150246	99.7873	218777572	97.8	0.0102055	193.4	34.2	7.17121	0.985932	0.952259	7.23055e-07	3162208	2941700	97485	123023	2.19948	1.45713	166	95	42	9408	3142380	6412	39	109	49
00114121198M17BFF2	A	SouthChina	Guangdong	Han	Cantonese	Female	199734780	19965.2	97.3	96.6	89.94	88.02	41.69	199504794	99.8849	195344436	97.8	0.00851096	200.5	37	6.40963	0.984485	0.97872	1.8647e-08	3119372	2904932	95127	119313	2.20335	1.44002	137	81	44	9323	3099756	5685	32	111	46
00114121201M20BFF2	A	CentralChina	Hubei	Han	Mandarin	Female	220092518	21999.8	97.25	95.62	89.46	86.46	41.51	219661324	99.8041	216751658	98.5	0.0213952	211.8	39.3	7.06155	0.986762	0.964109	0.0012237	3153846	2935392	96907	121547	2.19951	1.46458	164	89	44	9394	3133972	7063	30	111	47
00114121210M17BFF2	A	EastChina	Jiangsu	Han	Mandarin	Female	233114946	23298.8	97.66	97.42	91.12	89.94	40.91	232055424	99.5455	226895844	97.3	0.0173552	204.3	39.5	7.44586	0.986946	0.989763	0.000804121	3152785	2934425	96546	121814	2.20153	1.45282	157	82	47	9270	3133200	7987	41	121	48
00114121216M25BFF2	A	EastChina	Fujian	Han	Min	Female	251791336	25166.7	98.19	97.03	91.87	89.2	41.66	250986691	99.6804	245633768	97.6	0.00696294	214.1	40.5	8.07067	0.98707	0.968086	0.00313577	3175159	2954705	97337	123117	2.20048	1.46578	157	84	41	9521	3155168	5660	39	118	44
00114121217M18BFF2	A	NorthwestChina	Qinghai	Han	Mandarin	Female	215802792	21570.6	97.47	97.12	90.56	89.45	41.41	215367149	99.7981	210963538	97.8	0.0090473	191.4	34.5	6.91971	0.985952	0.995747	1.15977e-07	3165895	2947022	96784	122089	2.20224	1.52876	163	82	44	9391	3146049	8648	38	113	51
00114121218M19BFF2	A	CentralChina	Hunan	Han	Xiang	Female	184555352	18434.7	96.88	96.87	89.69	88.45	44.53	183697062	99.5349	176155178	95.4	0.0314584	221.3	45.1	5.87218	0.970971	0.889055	2.06756e-07	3123683	2910176	95086	118421	2.20145	1.45998	157	88	50	9317	3103999	8769	38	115	41
00114121227M24BFF2	A	SouthChina	Guangdong	Han	Hakka	Female	191877838	19182.5	97.44	94.94	90.19	85.57	41.28	191664959	99.8891	188227018	98.1	0.017075	218.1	39.8	6.15665	0.98453	0.970138	0.000501218	3143349	2928054	95560	119735	2.199	1.48674	156	76	41	9289	3123715	4997	35	109	44
00114121240F00BFF2	A	SouthChina	Guangdong	Han	Unknown	Male	211053456	21093.8	97.69	96.78	91.17	88.46	41.14	210374255	99.6782	206469000	97.8	0.0257639	211.6	42.8	6.75145	0.989779	0.511528	0.000706104	3125836	2908010	96265	121561	2.20234	1.48328	166	83	42	9285	3106159	4729	34	111	54
00114121240M24BFF2	A	SouthChina	Guangdong	Han	Hakka	Female	205344206	20526.3	97.47	95.34	90.33	86.55	41.12	205102083	99.8821	201316812	98	0.0187703	211.6	39.3	6.58833	0.98593	0.962254	3.42792e-08	3174273	2954772	97250	122251	2.2019	1.5137	167	73	48	9433	3154408	5341	43	114	52
00114121242F00BFF2	A	SouthChina	Guangdong	Han	Cantonese	Male	234397254	23420.1	97.64	97.26	91.03	89.89	41.51	233853467	99.768	226788430	96.8	0.0290767	192.7	38.4	7.49998	0.991683	0.503082	0.00086309	3135799	2916943	96609	122247	2.1995	1.47338	168	87	47	9388	3116057	6230	34	104	42
00114121242M19BFF2	A	SouthChina	Guangdong	Han	Cantonese	Female	214868956	21478.8	97.31	96.82	89.99	88.56	41.31	214506002	99.8311	210540044	98	0.00777697	197.4	35.4	6.89405	0.985835	0.975739	7.00387e-08	3174778	2953155	97860	123763	2.20062	1.45907	156	74	45	9344	3155158	4981	43	108	43
00114121248M17BFF2	A	SouthChina	Guangdong	Han	Min	Female	224105886	22401.2	97.24	97.32	90.34	89.69	41.23	223754147	99.843	219575124	98	0.0103828	201.3	36.2	7.18333	0.986706	0.982366	6.84328e-08	3158725	2939929	96740	122056	2.20232	1.4691	162	81	44	9313	3138988	5206	41	109	43
00114121253M16BFF2	A	CentralChina	Hunan	Han	Mandarin	Female	236906266	23682.1	97.17	97.31	90.09	89.66	41.23	236555699	99.852	232068122	98	0.00975684	202.5	36.6	7.59666	0.987482	1.00064	0.000817284	3167356	2947351	97430	122575	2.20033	1.49059	153	81	51	9483	3147462	7319	41	117	47
00114121261M25BFF2	A	SouthChina	Guangdong	Han	Cantonese	Female	202808020	20271	97.97	97.06	91.34	89.03	40.92	202551665	99.8736	199118500	98.2	0.0238015	209.5	39.6	6.51448	0.985184	0.981632	2.26245e-07	3129539	2913237	95727	120575	2.20145	1.44875	150	74	46	9323	3110041	5165	35	107	48
00114121268M19BFF2	A	SouthChina	Guangdong	Han	Min	Female	198125472	19803.8	97.22	95.15	89.33	85.36	42.42	197649079	99.7595	194981526	98.4	0.0195032	214.5	40.3	6.35258	0.983789	0.972397	2.27059e-08	3143585	2928042	95650	119893	2.20016	1.46335	166	77	46	9346	3123979	5086	35	93	45
00114121273M21BFF2	A	SouthChina	Guangdong	Han	Cantonese	Female	202947150	20287.2	97.83	96.01	90.46	86.27	41.35	202673349	99.8651	199612672	98.4	0.018351	217.4	40.7	6.51515	0.985063	0.981686	0.000744584	3129513	2916212	94999	118302	2.20433	1.45406	146	81	41	9332	3109741	7696	30	100	51
00114121282M19BFF2	A	SouthChina	Guangdong	Han	Hakka	Female	202030810	20190.1	97.53	96.61	90.5	87.55	41.07	201664491	99.8187	197239246	97.6	0.016374	227.6	47	6.46941	0.985342	0.975239	0.000333661	3131337	2917781	94961	118595	2.20135	1.47691	156	82	46	9341	3111775	7428	34	107	46
00114121287M27BFF2	A	SouthChina	Guangdong	Han	Cantonese	Female	176086056	17602.9	98.04	94.86	90.91	83.28	40.74	175474271	99.6526	172504708	98	0.0116424	257.1	49.7	5.64453	0.982951	0.992786	0.00377746	3143983	2927000	96210	120773	2.19876	1.46905	149	70	43	9133	3124671	3465	34	101	47
00114121294M26BFF2	A	SouthChina	Guangdong	Han	Cantonese	Female	196745090	19669.2	97.96	97.19	91.29	89.34	40.95	196403277	99.8263	192966842	98.1	0.0239187	208.6	37.6	6.31667	0.984323	0.986189	3.16856e-08	3145601	2928909	96048	120644	2.20042	1.47229	141	82	42	9338	3126003	5271	32	108	43
00114121298M19BFF2	A	SouthChina	Guangdong	Han	Min	Female	211134330	21104.5	97.33	96.05	89.79	87.21	41.47	210752852	99.8193	207644548	98.3	0.0181383	219	41.1	6.77351	0.986295	0.97792	0.000555581	3159237	2940523	96855	121859	2.20226	1.46333	146	81	40	9302	3139548	5577	39	107	42
00114121306M19BFF2	A	NortheastChina	Heilongjiang	Han	Mandarin	Female	206396898	20631.3	98.13	97.13	91.9	89.3	41.3	206181580	99.8957	201642244	97.7	0.0115974	201.8	37.4	6.6285	0.98522	1.01759	1.24745e-07	3130257	2914882	95640	119735	2.20309	1.45957	159	76	40	9223	3110726	7369	39	115	41
00114121307M26BFF2	A	CentralChina	Hunan	Han	Xiang	Female	197788808	19768.9	97.68	95.91	90.72	87.56	40.79	197479304	99.8435	194554228	98.4	0.0186392	211.9	39.7	6.34519	0.98502	0.990217	3.85208e-05	3141570	2925588	95712	120270	2.19907	1.43969	161	69	42	9178	3122246	5786	41	108	40
00114121312M26BFF2	A	SouthwestChina	Chongqing	Han	Mandarin	Female	207052870	20698.8	97.95	96.88	91.18	88.46	41.03	206744995	99.8513	202970944	98	0.0276033	213.5	38.7	6.64856	0.985226	0.969469	3.15446e-07	3142850	2927654	95633	119563	2.20265	1.45711	156	77	44	9193	3123391	9998	34	110	44
00114121317M24BFF2	A	EastChina	Anhui	Han	Mandarin	Female	198899162	19879.3	98.17	97.19	92.05	89.55	41.01	197976896	99.5363	193263934	97.2	0.0145949	219.7	43.6	6.36599	0.9854	0.98781	0.000232363	3153455	2936517	96006	120932	2.19663	1.49829	157	71	44	9305	3133869	6205	39	101	45
00114121319F00BFF2	A	EastChina	Shandong	Han	Mandarin	Male	245711368	24560.7	98.25	96.72	91.9	88.24	41.02	245366790	99.8598	237790990	96.8	0.0118508	214.9	40.4	7.88544	0.99353	0.513022	2.1978e-07	3127226	2911057	95847	120322	2.20128	1.47268	154	72	46	9267	3107724	13980	37	101	45
00114121319M16BFF2	A	CentralChina	Hubei	Han	Mandarin	Female	259597202	25920.5	97.99	96.69	91.69	88.31	44.58	258243538	99.4786	249975650	96.3	0.00623609	210.7	44.2	8.28927	0.981145	0.902636	0.000292836	3149706	2933041	96581	120084	2.20327	1.45031	185	92	39	9318	3129984	15603	37	123	47
00114121324F00BFF2	A	SouthChina	Guangdong	Han	Mandarin	Male	182127430	18204.4	97.31	96.52	89.87	87.67	41.71	181750676	99.7931	178261918	97.9	0.0234094	223.5	45.5	5.83293	0.984964	0.505925	0.000505198	3116281	2900427	95550	120304	2.20187	1.50329	165	83	45	9198	3096827	5150	41	100	51
00114121324M23BFF2	A	SouthChina	Guangdong	Han	Mandarin	Female	208852550	20878.8	97.83	97.27	91.22	89.57	40.83	208433364	99.7993	205139266	98.2	0.0215584	206.1	37.3	6.70093	0.985667	0.968475	0.00118812	3171825	2951270	97426	123129	2.19859	1.49318	167	81	48	9295	3152358	6626	43	112	43
00114121327F00BFF2	A	CentralChina	Hubei	Han	Unknown	Male	180262402	18011.3	98.12	95.79	92.15	87.04	41.16	179875838	99.7856	173443938	96.2	0.0104874	203.9	40.3	5.77689	0.98646	0.501752	9.36265e-05	3090659	2876305	95119	119235	2.19946	1.42446	139	76	45	9157	3071463	7783	35	104	43
00114121327M21BFF2	A	SouthwestChina	Sichuan	Han	Mandarin	Female	193789132	19372.9	97.35	95.97	89.55	86.34	41.61	193193309	99.6925	190194122	98.1	0.0198923	221.5	40.2	6.21262	0.984273	0.950091	1.91942e-07	3163345	2943654	97113	122578	2.20237	1.53865	174	81	49	9430	3143556	5302	41	111	50
00114121329F00BFF2	A	SouthChina	Guangdong	Han	Unknown	Male	178549572	17838	97.96	95.9	91.53	87.03	41.64	178210491	99.8101	169945706	95.2	0.00982968	203.6	41.3	5.71828	0.984081	0.493461	0.00148578	3109588	2895669	95008	118911	2.19947	1.4936	157	72	45	9220	3090127	11891	40	106	49
00114121329M17BFF2	A	SouthChina	Guangdong	Han	Hakka	Female	206890832	20677.7	97.66	97.07	91.02	88.94	41.59	205716415	99.4323	201463514	97.4	0.0143953	212.2	41.7	6.60048	0.985698	0.980559	0.000568146	3161571	2942807	96658	122106	2.19954	1.48835	166	73	41	9353	3141947	5070	32	108	46
00114121331M20BFF2	A	SouthChina	Guangdong	Han	Mandarin	Female	174438216	17437	97.5	97.09	90.35	88.85	41.27	174279263	99.9089	171547062	98.3	0.0222183	222.3	41.5	5.58713	0.98213	0.985275	0.00109104	3098689	2889299	93612	115778	2.20432	1.4223	137	63	38	8995	3079611	9525	35	102	52
00114121335M17BFF2	A	SouthChina	Guangdong	Han	Hakka	Female	205332292	20520.5	98.18	97.27	92.07	89.75	41.23	205048114	99.8616	200618024	97.7	0.0112738	200.2	37.2	6.59298	0.984837	1.0038	8.82521e-05	3158080	2940245	96514	121321	2.20067	1.47165	159	73	41	9371	3138340	4883	40	107	44
00114121341F00BFF2	A	SouthChina	Guangdong	Han	Cantonese	Male	211984922	21181.9	98.4	96.98	92.44	88.91	40.9	211249833	99.6532	207617540	97.9	0.0234334	219.1	44.5	6.78726	0.990221	0.514778	0.000767628	3142316	2922789	97178	122349	2.19816	1.49915	162	83	43	9292	3122813	6276	41	104	39
00114121341M22BFF2	A	SouthChina	Guangdong	Han	Cantonese	Female	225531202	22543.7	97.99	96.37	91.77	87.61	40.9	225366710	99.9271	220028328	97.6	0.011942	222.2	42.1	7.24912	0.987006	1.01475	0.000152942	3181992	2959316	98396	124280	2.2005	1.48683	149	82	46	9358	3162284	4987	40	115	50
00114121342M25BFF2	A	SouthChina	Guangdong	Han	Min	Female	201005810	20087.1	98.02	96.64	91.49	88.55	41.33	200376508	99.6869	196716572	97.9	0.0267621	201.6	41.1	6.43785	0.984316	0.989078	1.40953e-07	3143325	2927546	95860	119919	2.19941	1.448	158	82	43	9390	3123699	4487	37	107	42
00114121344M18BFF2	A	SouthChina	Guangdong	Han	Cantonese	Female	196101812	19603.1	97.21	95.39	89.33	85.91	41.87	195690809	99.7904	192586684	98.2	0.0225724	216.1	40.2	6.29166	0.984072	0.961424	8.10744e-05	3151675	2935160	96042	120473	2.20093	1.4854	160	78	43	9400	3131868	4620	39	110	43
00114121350M19BFF2	A	SouthChina	Guangdong	Han	Cantonese	Female	218557278	21845.2	98.16	97.21	92.02	89.65	41.14	218336124	99.8988	212225032	97.1	0.0122736	196.7	38	7.01882	0.986191	1.0089	0.00234557	3145533	2928350	96077	121106	2.20164	1.47844	160	74	45	9394	3125844	5257	41	106	47
00114121352F00BFF2	A	SouthwestChina	Sichuan	Han	Unknown	Male	206245686	20613.7	98.38	98.41	94.53	94.18	40.97	205791445	99.7798	200413134	97.2	0.0272472	224.1	45.8	6.61584	0.990703	0.50729	0.000149247	3142364	2923118	97280	121966	2.20061	1.50407	171	72	49	9358	3122621	6915	42	112	44
00114121352M25BFF2	A	SouthChina	Guangdong	Han	Cantonese	Female	223765446	22369.1	98	97.16	91.38	89.22	40.87	223176573	99.7368	219125930	97.9	0.0288439	205.5	37.7	7.17637	0.986383	0.98755	7.52599e-08	3174773	2954057	97755	122961	2.20243	1.48659	157	83	43	9485	3154903	4980	42	120	48
00114121358M21BFF2	A	SouthChina	Guangdong	Han	Cantonese	Female	180818354	18044.5	98	96.83	91.89	88.72	41.5	178016109	98.4502	175353054	97	0.0265356	215.8	40.5	5.72377	0.981839	0.994349	6.02618e-08	3136234	2922632	95191	118411	2.20172	1.47312	166	85	43	9158	3116899	4557	31	121	42
00114121359M26BFF2	A	SouthChina	Guangdong	Han	Cantonese	Female	188603922	18851.4	98.05	96	91.4	88.13	41.2	188249085	99.8119	184266046	97.7	0.0134748	235	47.8	6.05229	0.984757	0.972216	0.00123042	3126070	2913434	94768	117868	2.20266	1.4536	158	69	46	9243	3106524	7160	36	108	46
00114121366M18BFF2	A	SouthChina	Guangdong	Han	Cantonese	Female	184306592	18425.4	97.27	95.88	89.55	86.8	41.69	183889470	99.7737	181058556	98.2	0.0179784	226.8	42.6	5.91208	0.98383	0.989103	0.00046539	3128639	2913352	95721	119566	2.19828	1.44715	153	71	45	9256	3109021	4569	42	108	46
00114121370F00BFF2	A	SouthChina	Guangdong	Han	Cantonese	Male	192674266	19247.4	98.04	96.09	91.79	87.49	41.33	192312774	99.8124	185177330	96.1	0.0108932	204.3	40.5	6.17325	0.988549	0.499168	4.55004e-08	3130409	2913287	96166	120956	2.20058	1.48871	163	75	40	9497	3110490	8944	42	105	51
00114121370M18BFF2	A	SouthChina	Guangdong	Han	Cantonese	Female	201667242	20161.1	97.11	95.73	89.12	86.35	41.68	201175539	99.7562	198536210	98.4	0.0191846	230.1	43.1	6.4691	0.985263	0.992882	0.00300133	3172783	2952730	97302	122751	2.19998	1.50304	146	73	42	9392	3153011	4486	33	105	49
00114121373M23BFF2	A	CentralChina	Hunan	Han	Xiang	Female	200565848	20048.9	97.81	96.12	91.14	88.1	41.06	200363803	99.8993	196824774	98.1	0.0201891	205.3	37.4	6.43688	0.984778	0.955297	0.00216803	3131283	2916196	95278	119809	2.19883	1.47518	157	72	44	9156	3111857	6094	37	100	41
00114121376F00BFF2	A	SouthChina	Guangdong	Han	Cantonese	Male	158789624	15868.9	98.18	96.34	91.61	87.27	41.25	158494323	99.814	152284200	95.9	0.00853458	219.2	45.5	5.09067	0.981294	0.500852	0.00236676	3101606	2888395	95007	118204	2.20075	1.4724	147	86	41	9200	3082287	7008	36	109	50
00114121376M16BFF2	A	SouthChina	Guangdong	Han	Cantonese	Female	220341784	22023	98.14	97.14	91.86	89.33	41.1	220079762	99.8811	214625142	97.4	0.012263	203.9	37.8	7.07584	0.986262	1.00584	0.001329	3164403	2944108	97162	123133	2.1987	1.47225	166	90	46	9454	3144503	5064	39	104	49
00114121377M25BFF2	A	CentralChina	Hubei	Han	Mandarin	Female	294723612	29461.2	98.05	96.67	91.94	88.44	40.9	294475587	99.9158	285584106	96.9	0.0115973	224.8	44.2	9.46979	0.989123	1.00771	2.78962e-09	3187959	2964505	98258	125196	2.19896	1.51511	152	77	41	9541	3167947	8387	38	101	47
00114121380F00BFF2	A	SouthChina	Guangdong	Han	Cantonese	Male	201688410	20146.6	97.66	96.63	91.05	88.14	40.68	201143062	99.7296	195064432	96.7	0.0271125	214.2	47	6.44392	0.990246	0.511481	2.33192e-08	3107298	2892341	95296	119661	2.19947	1.46945	138	74	45	9227	3087943	6435	36	113	49
00114121380M27BFF2	A	SouthChina	Guangdong	Han	Cantonese	Female	196858286	19679.8	97.91	96.79	91.02	88.16	40.89	196638468	99.8883	192895214	98	0.02901	218.7	42.1	6.32197	0.985018	0.982841	5.7098e-08	3145254	2927852	96176	121226	2.20186	1.47978	164	78	44	9245	3125800	5018	37	110	47
00114121384F00BFF2	A	EastChina	Jiangsu	Han	Unknown	Male	189047550	18889.9	97.97	96	91.56	87.26	41.67	188724968	99.8294	178540186	94.4	0.0112814	204.2	41.3	6.05415	0.987013	0.495838	0.000384862	3105860	2890507	95560	119793	2.20355	1.4462	154	84	43	9311	3086299	14913	37	109	43
00114121384M21BFF2	A	SouthChina	Guangdong	Han	Cantonese	Female	228168906	22807.9	97.66	96.57	90.39	88.06	41.78	227474214	99.6955	223659874	98	0.0239402	204.7	36.6	7.31497	0.986408	0.966301	1.26555e-07	3155640	2936037	97158	122445	2.19685	1.46424	163	73	43	9598	3135628	5711	39	111	51
00114121386M21BFF2	A	SouthChina	Guangdong	Han	Mandarin	Female	185778664	18572.3	97.55	97.14	90.33	88.89	41.05	185615213	99.912	182514658	98.2	0.02404	222.8	41.6	5.95339	0.984148	0.981875	0.00160114	3139772	2923937	95959	119876	2.20268	1.47156	156	81	50	9288	3120165	6530	35	99	42
00114121392M17BFF2	A	SouthChina	Guangdong	Han	Hakka	Female	181239584	18116.5	97	96.06	89.74	86.63	41.04	180898851	99.812	178468006	98.5	0.0214002	222	41.2	5.81574	0.983399	0.987763	8.63147e-05	3136159	2920878	95830	119451	2.20119	1.43984	155	73	43	9258	3116640	4582	37	105	48
00114121395M17BFF2	A	SouthChina	Guangdong	Han	Hakka	Female	223151236	22306.2	97.03	96.94	90.31	88.81	41.78	222975513	99.9213	217208494	97.3	0.013309	222.9	41.9	7.15054	0.986748	0.972755	6.88551e-05	3157927	2939430	96968	121529	2.20075	1.46917	157	76	45	9526	3137896	6136	42	112	48
00114121397M25BFF2	A	EastChina	Anhui	Han	Mandarin	Female	228429648	22833.7	97.77	97.11	91.01	89.11	40.96	228163858	99.8836	224665148	98.4	0.0220845	209.1	37.9	7.3353	0.986928	0.988006	0.000416825	3156798	2937591	96877	122330	2.19916	1.44799	153	82	44	9238	3137342	7248	40	116	50
00114121406M23BFF2	A	SouthChina	Guangdong	Han	Cantonese	Female	218874930	21880.7	97.94	97.12	91.23	89.11	40.96	218662781	99.9031	214570686	98	0.0266946	208.6	37.6	7.03074	0.986374	0.981625	4.26404e-09	3161862	2943002	97061	121799	2.19686	1.4624	168	75	46	9397	3142085	5289	37	112	45
00114121423M23BFF2	A	SouthChina	Guangdong	Han	Cantonese	Female	198390562	19833.5	97.65	96.97	90.63	88.7	41.08	198159859	99.8837	195061550	98.3	0.0202183	215.3	39.2	6.36965	0.984943	0.978637	0.000656556	3149730	2932343	96478	120909	2.20101	1.46405	155	82	46	9319	3130104	4715	41	101	47
00114121431M19BFF2	A	CentralChina	Hunan	Han	Xiang	Female	246696880	24645.5	97.78	96.96	90.89	88.92	43.76	245503362	99.5162	237177734	96.1	0.00709068	214.6	42.6	7.88246	0.986399	0.921157	1.53571e-07	3150735	2932198	97081	121456	2.20241	1.47515	170	98	44	9453	3130796	9603	42	103	52
00114121444F00BFF2	A	SouthChina	Guangdong	Han	Unknown	Male	176426746	17629.5	97.95	95.63	91.36	86.26	40.9	176151703	99.8441	167193806	94.8	0.0103169	213.2	44	5.65377	0.986059	0.510082	2.11545e-07	3107591	2892430	95351	119810	2.19523	1.48665	156	76	47	9200	3088358	10880	39	105	45
00114121444M19BFF2	A	SouthChina	Guangdong	Han	Mandarin	Female	292462052	29209.3	97.99	96.92	91.72	88.99	44.53	291143379	99.5491	282248180	96.5	0.00499524	211.3	42.6	9.3485	0.982547	0.921208	0.000379661	3189512	2965846	98708	124958	2.20055	1.49537	176	93	47	9507	3169500	8447	37	118	54
00114121452F00BFF2	A	SouthChina	Guangdong	Han	Unknown	Male	193021346	19285.8	97.18	96.61	89.51	87.93	41.08	192559757	99.7609	188717614	97.8	0.0238331	217.9	45.2	6.17514	0.988589	0.516556	0.000679567	3115612	2899862	95828	119922	2.19948	1.46738	152	63	52	9171	3096165	5954	29	114	47
00114121452M19BFF2	A	SouthwestChina	Sichuan	Han	Mandarin	Female	156636146	15644.2	97.87	97.12	90.67	88.97	45.22	155682824	99.3914	150720628	96.2	0.00407503	201.5	39.1	4.99963	0.933401	0.891367	1.24478e-07	3143445	2926506	96457	120482	2.2025	1.52522	153	91	44	9418	3123606	9407	39	104	45
00114121457M18BFF2	A	EastChina	Jiangxi	Han	Mandarin	Female	200870550	20079.5	97.45	95.94	89.63	86.32	41.69	200601218	99.8659	197725588	98.4	0.0218915	223.1	42	6.4501	0.985091	0.986873	0.000373397	3160555	2942989	96470	121096	2.20167	1.48945	162	75	44	9522	3140639	6006	40	106	46
00114121462M17BFF2	A	NorthwestChina	Qinghai	Han	Mandarin	Female	259965924	25986.8	97.82	96.52	91.53	87.98	41.17	259761801	99.9215	252620414	97.2	0.0126428	221.7	41.2	8.35473	0.9885	1.01166	0.000138772	3171262	2949682	98125	123455	2.19975	1.49231	160	79	43	9337	3151589	7309	40	109	48
00114121465F00BFF2	A	SouthChina	Guangdong	Han	Cantonese	Male	175062734	17496.7	97.93	95.63	91.32	86.24	40.94	174713387	99.8004	169248300	96.7	0.0100305	211.8	41.9	5.61098	0.985939	0.513388	0.00469282	3126504	2910401	95748	120355	2.1969	1.48722	158	77	41	9124	3107146	6151	31	105	44
00114121465M18BFF2	A	SouthChina	Guangdong	Han	Cantonese	Female	209809534	20972.5	97.45	96.12	89.63	86.8	41.43	209401780	99.8057	206262930	98.3	0.0233983	219.4	41.5	6.73213	0.985833	0.964388	0.0003076	3158012	2938404	97323	122285	2.20039	1.49624	161	70	39	9331	3138369	4953	37	107	46
00114121477M17BFF2	A	SouthChina	Guangdong	Han	Min	Female	173805098	17374.5	97.45	96.1	89.62	86.77	41.48	173443401	99.7919	171149336	98.5	0.0227545	222.6	42.5	5.57617	0.981645	0.964048	0.00162528	3132344	2917875	95318	119151	2.20259	1.47167	158	78	44	9320	3112764	4303	34	105	46
00114121483M16BFF2	A	CentralChina	Hubei	Han	Mandarin	Female	206722888	20664	97.35	95.96	89.33	86.33	41.41	206511387	99.8977	203374064	98.4	0.0243418	224.8	43.5	6.63841	0.985777	0.974811	0.00167059	3165532	2947213	96714	121605	2.20095	1.48178	156	79	53	9281	3145717	8133	45	106	43
00114128001M23BFF2	A	SouthChina	Guangdong	Han	Cantonese	Female	175456342	17538.6	98.07	96.97	91.61	88.88	41.27	175263956	99.8904	170741488	97.3	0.00976478	209	39.3	5.6354	0.981985	0.990594	1.09608e-07	3130528	2915848	95353	119327	2.20303	1.45985	157	74	47	9123	3111207	4715	39	104	47
00114128002M27BFF2	A	SouthChina	Guangdong	Han	Min	Female	223329132	22323.9	97.78	96.03	91.04	87.84	41.05	223020824	99.8619	219211162	98.2	0.0202153	206.6	37.7	7.16717	0.986531	0.989714	0.00076178	3151187	2934127	96347	120713	2.20313	1.46026	156	74	47	9303	3131609	4983	40	111	46
00114128003M16BFF2	A	CentralChina	Henan	Han	Mandarin	Female	165453230	16526.6	97.57	97.35	90.3	89.53	43.63	164510550	99.4302	160072174	96.7	0.0285719	202.2	39.1	5.26856	0.971286	0.933271	0.00293424	3121422	2905680	96550	119192	2.20462	1.47229	435	75	139	9530	3100284	10590	43	135	42
00114128008M27BFF2	A	SouthChina	Guangdong	Han	Mandarin	Female	176017564	17591.3	98.09	96.74	91.6	88.23	41.35	175067197	99.4601	171570680	97.5	0.0123927	229.5	47.3	5.62843	0.982314	0.971987	0.00129344	3112377	2901321	94148	116908	2.20165	1.43761	159	73	43	9154	3093003	7680	36	111	44
00114128009M26BFF2	A	SouthChina	Guangdong	Han	Min	Female	284101332	28396	97.69	96.09	90.81	86.69	41.63	283880108	99.9221	270511362	95.2	0.0135582	229.8	45.3	9.12162	0.989544	0.962103	2.9116e-08	3195245	2970981	99175	125089	2.19982	1.48373	163	75	45	9487	3175336	8291	37	109	53
00114128010M17BFF2	A	CentralChina	Hunan	Han	Mandarin	Female	337170838	33688.5	98	96.95	91.72	88.98	44.26	335976790	99.6459	326249082	96.8	0.00625401	208.1	40.9	10.7953	0.987416	0.911221	0.000418365	3175043	2952535	98254	124254	2.20093	1.48236	139	88	44	9425	3155258	9849	43	114	41
00115011001M20BFF2	A	EastChina	Anhui	Han	Hui	Female	197163160	19709.3	97.59	97	90.47	89.14	40.95	196968305	99.9012	193866440	98.3	0.025601	220.7	41.4	6.31845	0.984997	0.982344	0.000623063	3143708	2926930	96274	120504	2.19822	1.49043	148	80	43	9273	3124176	7037	42	100	51
00115011005M24BFF2	A	SouthChina	Guangdong	Han	Cantonese	Female	202217270	20215	97.78	96.71	90.57	87.85	40.89	202036966	99.9108	198692698	98.3	0.0283683	223.2	41.6	6.49654	0.985898	0.978708	0.000834015	3144667	2927748	96202	120717	2.19921	1.45444	171	80	45	9211	3125201	5126	41	110	49
00115011016M16BFF2	A	SouthChina	Guangdong	Han	Cantonese	Female	203235720	20310.9	97.45	95.92	89.87	86.26	41.76	202792319	99.7818	199717962	98.3	0.0202177	214.8	42.8	6.51776	0.985085	0.982952	0.000276088	3158712	2942191	95900	120621	2.18168	1.47199	147	72	47	9468	3138854	15536	39	136	45
00115011017F00BFF2	A	SouthChina	Guangdong	Han	Li	Male	203288262	20317.3	98.25	96.63	91.72	87.83	41.25	202904834	99.8114	199025916	97.9	0.024794	225	46	6.5209	0.99034	0.513582	0.000128674	3106357	2893965	94639	117753	2.20119	1.45437	135	71	37	9222	3086809	9642	41	108	49
00115011017M18BFF2	A	SouthChina	Guangdong	Han	Li	Female	233722602	23364.5	98.49	97.28	92.42	89.38	41.51	233493347	99.9019	228576432	97.8	0.0166709	224.8	43.5	7.50862	0.987193	0.979829	0.000161089	3157095	2939735	96591	120769	2.19726	1.47664	148	82	38	9346	3137464	8658	43	111	46
00115011032M16BFF2	A	NorthwestChina	Shaanxi	Han	Mandarin	Female	211020380	21093.2	97.57	96.51	90.33	87.8	41.92	210633088	99.8165	207369722	98.3	0.0232078	207	38.4	6.77033	0.98531	0.955651	0.000655257	3148934	2931369	96365	121200	2.20355	1.45349	146	77	40	9322	3129276	6921	35	114	41
00115011035M13BFF2	A	SouthChina	Guangdong	Han	Mandarin	Female	203499668	20339.1	98.58	97.62	92.84	90.55	41.59	202999629	99.7543	198367808	97.5	0.0180939	212.4	42.6	6.52652	0.984527	0.981588	0.00017443	3166123	2947206	97055	121862	2.20123	1.47298	150	73	42	9408	3146325	4447	41	114	46
00115011038M26BFF2	A	SouthChina	Guangdong	Han	Mandarin	Female	215509876	21542.3	97.75	97.16	91	89.31	41.06	215227660	99.869	211777228	98.3	0.0215039	207.9	37.8	6.919	0.986078	0.984163	0.000304092	3158632	2940085	96776	121771	2.20101	1.47608	157	88	44	9371	3138882	6687	35	110	49
00115011063M17BFF2	A	NorthChina	Hebei	Han	Mandarin	Female	218905312	21881.3	98.49	97.41	92.45	89.8	41.2	218481136	99.8062	213610430	97.6	0.0170326	224	43.9	7.02659	0.987028	0.977534	3.90414e-08	3158549	2939373	97084	122092	2.20003	1.47462	152	80	36	9375	3138905	8478	35	107	44
00115011065M16BFF2	A	SouthChina	Guangdong	Han	Cantonese	Female	224550912	22447.9	97.87	97.29	91.08	89.4	42.12	224271761	99.8757	220561940	98.2	0.0248691	209.6	38.4	7.20268	0.985499	0.942553	1.02175e-07	3143578	2926705	95805	121068	2.2006	1.46776	153	74	49	9312	3123967	5224	41	106	41
00115011067M17BFF2	A	SouthChina	Guangdong	Han	Cantonese	Female	271428044	27118.9	97.86	97.29	91.68	90.11	41.71	270395012	99.6194	264297806	97.4	0.00913423	201.5	38.4	8.69	0.987867	0.959058	0.000725601	3172994	2951265	98024	123705	2.20301	1.47137	156	85	42	9537	3153090	6041	32	102	48
00115011069F00BFF2	A	SouthChina	Guangdong	Han	Cantonese	Male	174279084	17415.6	98.01	95.92	91.62	86.99	41.12	173907746	99.7869	168701608	96.8	0.0093796	209.2	41.4	5.58523	0.985958	0.508452	0.000332097	3121535	2905581	95658	120296	2.20064	1.49845	157	76	41	9388	3101716	5885	32	100	51
00115011069M19BFF2	A	SouthChina	Guangdong	Han	Cantonese	Female	177749798	17768.9	97.88	97.1	90.82	88.71	41.6	177227806	99.7063	174932134	98.4	0.0218131	221.8	40.4	5.69713	0.982036	0.957206	0.000270885	3152307	2934031	96622	121654	2.20227	1.4707	151	74	46	9312	3132638	4103	35	105	44
00115011070M27BFF2	A	SouthChina	Guangdong	Han	Cantonese	Female	194293616	19423	98.13	97.02	91.41	88.75	40.99	194071204	99.8855	190797914	98.2	0.0209678	212.3	38.9	6.23877	0.984236	0.976756	0.000468902	3158277	2940623	96697	120957	2.19932	1.48387	166	73	52	9475	3138437	4217	36	111	48
00115011071M21BFF2	A	SouthChina	Guangdong	Han	Cantonese	Female	205775170	20570.1	97.76	96.18	91	88.23	40.98	205275309	99.7571	201817344	98.1	0.0204463	203.4	37.1	6.59766	0.985301	0.979966	0.000969834	3135685	2920217	95479	119989	2.19554	1.45543	142	68	42	9176	3116271	4699	41	108	43
00115011077M26BFF2	A	SouthChina	Guangdong	Han	Mandarin	Female	243202302	24308.4	98.18	97.45	92.12	90.21	41.07	243018144	99.9243	237340590	97.6	0.0307692	190	34.4	7.81152	0.986662	0.971489	0.000143696	3170991	2950796	97165	123030	2.19932	1.46395	143	81	38	9353	3151309	5592	35	102	48
00115011078M16BFF2	A	SouthChina	Guangdong	Han	Cantonese	Female	168839156	16878	97.85	97.19	90.85	88.78	41.12	168587751	99.8511	166116732	98.4	0.021862	222.4	42	5.4142	0.981155	0.986353	0.00222677	3128359	2914268	95179	118912	2.19947	1.46475	169	75	43	9323	3108781	4255	34	114	44
00115011082F00BFF2	A	SouthChina	Guangxi	Zhuang	Unknown	Male	206669230	20648.5	98.36	96.9	92.25	88.83	40.9	206124531	99.7364	200029246	96.8	0.0250379	210.4	46	6.61744	0.990274	0.513967	0.000362811	3130527	2913600	95813	121114	2.19792	1.499	148	73	42	9221	3110967	5887	40	117	47
00115011082M23BFF2	A	SouthChina	Guangxi	Yao	Mandarin	Female	209507616	20941	97.78	96.97	91.07	88.78	40.81	209289870	99.8961	205945710	98.3	0.0207396	207.8	38.7	6.72518	0.985818	0.983653	5.93708e-08	3155337	2936540	96630	122167	2.19855	1.45441	171	86	48	9454	3135434	6030	42	111	42
00115011085M16BFF2	A	SouthChina	Guangdong	Han	Cantonese	Female	229651750	22956.5	97.96	97.47	91.45	90.03	41.05	228568256	99.5282	224349044	97.7	0.0272152	202.1	37.4	7.3394	0.986853	0.970319	2.5489e-07	3160729	2941740	97019	121970	2.19963	1.47902	165	70	43	9376	3140967	5192	39	124	41
00115011087M24BFF2	A	SouthChina	Guangdong	Han	Cantonese	Female	275345076	27527	97.98	96.55	91.68	88.03	40.8	275125168	99.9201	268392296	97.5	0.011726	230.5	43.2	8.85142	0.988447	1.02513	0.00050651	3179766	2957537	98123	124106	2.19914	1.46738	164	75	42	9414	3160064	5820	32	107	50
00115011090M17BFF2	A	SouthChina	Guangdong	Han	Mandarin	Female	212734250	21263.9	97	97.62	91.16	90.38	41.33	212494202	99.8872	209203850	98.3	0.0288092	203.9	37.4	6.81629	0.985671	0.97203	7.8272e-08	3156576	2938180	96815	121581	2.19835	1.50931	163	77	44	9303	3136809	7338	30	110	46
00115011094M24BFF2	A	CentralChina	Henan	Han	Mandarin	Female	225004832	22482.9	97.92	96.26	90.97	87.26	41.23	224035150	99.569	220216674	97.9	0.0215985	205	41.4	7.20096	0.986396	0.982376	0.000195517	3166493	2946982	97095	122416	2.19879	1.49069	163	69	41	9319	3146775	8294	37	117	49
00115011098M25BFF2	A	SouthChina	Guangdong	Han	Cantonese	Female	191859918	19174.7	98.16	96.97	91.84	88.8	41.05	191492975	99.8087	187257766	97.6	0.0148116	227.7	46.7	6.15623	0.98467	0.987952	0.000243087	3131902	2916233	95619	120050	2.19952	1.46363	140	69	45	9163	3112623	4693	37	104	47
00115011101M19BFF2	A	SouthChina	Guangdong	Han	Mandarin	Female	205300012	20522.6	97.61	95.78	90	87.2	40.92	204997942	99.8529	201918454	98.4	0.0183915	217.5	40.4	6.58821	0.985649	0.979509	7.22788e-08	3134490	2919572	95313	119605	2.20153	1.4467	149	64	39	9187	3114947	4671	36	99	46
00115011111M25BFF2	A	CentralChina	Henan	Han	Mandarin	Female	206577282	20647.6	97.94	97	91.15	88.76	40.97	206264960	99.8488	202877542	98.2	0.0279344	214	39.7	6.63083	0.98577	0.98294	7.57102e-08	3155453	2937969	96400	121084	2.20204	1.48801	164	80	42	9363	3135730	8066	41	111	51
00115011112M17BFF2	A	SouthChina	Guangdong	Han	Cantonese	Female	206228874	20616.8	97.86	97.05	90.95	88.94	41.05	205908091	99.8445	202514680	98.2	0.0238361	212.7	38.2	6.61963	0.985728	0.98255	1.36349e-07	3145482	2928989	96182	120311	2.20324	1.45937	140	86	47	9333	3125741	5150	37	113	48
00115011113M18BFF2	A	SouthChina	Guangdong	Han	Cantonese	Female	289716170	28954.1	97.02	94.85	89.8	85.42	41.16	289044283	99.7681	282365872	97.5	0.00885348	202.5	38.4	9.27627	0.988503	1.00415	1.04982e-07	3187006	2966112	97557	123337	2.20028	1.51611	157	69	43	9499	3167151	6052	40	118	45
00115011117M27BFF2	A	SouthChina	Guangdong	Han	Cantonese	Female	205072536	20501.1	98.16	97.16	91.58	89.22	41.09	204891597	99.9118	200972454	98	0.0215078	203.6	37	6.58879	0.985052	0.973305	3.99342e-07	3154949	2937133	96710	121106	2.19974	1.49025	160	76	40	9486	3135091	5604	41	111	48
00115011133M18BFF2	A	SouthChina	Guangdong	Han	Cantonese	Female	230263466	23016.8	98.1	96.56	92.13	88.21	41	230086315	99.9231	222906538	96.8	0.0128899	219.4	42.6	7.39796	0.987833	1.00775	5.2218e-08	3161478	2941780	97280	122418	2.19807	1.48714	162	73	45	9355	3141715	6481	34	126	45
00115011135M17BFF2	A	SouthChina	Guangdong	Han	Cantonese	Female	215009720	21494.5	97.86	96.74	90.61	87.9	41.47	214645060	99.8304	211757586	98.5	0.0223835	222.6	41.5	6.90376	0.985997	0.983266	0.000159672	3160224	2941458	97106	121660	2.20265	1.47674	143	77	42	9340	3140579	6918	45	125	41
00115011137M16BFF2	A	SouthChina	Guangdong	Han	Cantonese	Female	191188666	19110	97.89	96.78	90.78	88.14	41.69	190593703	99.6888	187737140	98.2	0.0227101	220	41.5	6.12621	0.984299	0.96664	0.000482271	3135612	2919754	95754	120104	2.20179	1.43443	162	71	47	9422	3115870	4977	37	107	49
00115011138M23BFF2	A	SouthChina	Guangdong	Han	Cantonese	Female	185386712	18530.7	98.35	97.3	92.18	89.7	40.97	185116981	99.8545	182101660	98.2	0.0216984	206.5	37.3	5.95236	0.983375	0.993872	0.000456779	3124172	2909302	95377	119493	2.20091	1.4172	143	75	42	9362	3104581	4864	39	101	45
00115011145M16BFF2	A	SouthChina	Guangdong	Han	Min	Female	215486562	21540.1	97.89	96.77	90.79	88.09	41.87	215102892	99.822	211658458	98.2	0.0237461	218.8	40.8	6.91562	0.986155	0.959226	4.25712e-07	3165772	2946330	97353	122089	2.19926	1.46897	151	87	45	9348	3146004	5025	45	107	45
00115011146M21BFF2	A	CentralChina	Henan	Han	Mandarin	Female	207212476	20712.3	97.73	95.66	90.87	86.97	41.01	206927523	99.8625	203448986	98.2	0.0185583	209.9	39.4	6.64888	0.985955	0.966699	0.000610831	3135417	2919866	95692	119859	2.20105	1.47849	159	73	47	9217	3115998	6962	42	114	45
00115011152M20BFF2	A	SouthChina	Guangdong	Han	Cantonese	Female	212001100	21190.5	97.8	97.19	91.14	89.36	40.98	211772233	99.892	208682368	98.4	0.023593	207.3	38	6.80973	0.985732	0.956422	5.72084e-07	3147826	2930566	96155	121105	2.1967	1.4973	162	89	44	9324	3128238	7131	42	103	43
00115011161M25BFF2	A	CentralChina	Hunan	Han	Xiang	Female	173874966	17380.1	97.94	96.2	91.67	87.8	40.82	173622550	99.8548	168274282	96.8	0.00843101	210	39.8	5.58116	0.980849	1.02137	0.000433268	3118742	2905565	94745	118432	2.20096	1.46588	157	75	44	9141	3099411	4970	34	115	50
00115011166M16BFF2	A	EastChina	Jiangxi	Han	Mandarin	Female	163847610	16375	98.47	97.14	92.36	89.09	41.17	163553549	99.8205	159939350	97.6	0.0148531	227	45.7	5.25816	0.980309	0.969779	0.00117919	3131038	2917388	95165	118485	2.20142	1.46136	147	78	44	9294	3111475	6108	34	112	47
00115011171M18BFF2	A	CentralChina	Hubei	Han	Mandarin	Female	170610958	17049.2	98.17	96.75	91.74	88.37	41.34	170024721	99.6564	166895414	97.8	0.00723091	221.2	43.2	5.4656	0.979906	0.977592	0.00121064	3113186	2903007	93923	116256	2.20318	1.43679	160	79	37	9260	3093724	8612	35	120	48
00115011174M19BFF2	A	CentralChina	Hubei	Han	Mandarin	Female	279464046	27909.6	97.65	96.69	90.97	88.43	43.16	278416767	99.6253	270727976	96.9	0.00752257	215	43.9	8.93947	0.988465	0.914493	0.000164158	3187192	2965302	98335	123555	2.19958	1.4906	167	82	45	9661	3166998	9758	39	112	44
00115011183M24BFF2	A	SouthChina	Guangdong	Han	Cantonese	Female	197961348	19788	98.34	97.15	92.09	89.26	40.91	197739099	99.8877	194694646	98.3	0.0233959	209.9	38	6.35806	0.984534	0.991354	8.60279e-08	3145360	2927650	96614	121096	2.20378	1.44984	145	73	44	9263	3125843	4678	37	105	48
00115011190M25BFF2	A	SouthChina	Guangdong	Han	Cantonese	Female	193275452	19321.5	98.27	97.03	91.84	88.91	40.98	193034057	99.8751	189858540	98.2	0.0210346	215.4	39.6	6.20352	0.984563	0.974043	1.41381e-07	3149104	2931798	96317	120989	2.20013	1.47499	157	85	47	9304	3129585	7528	37	105	41
00115011198M18BFF2	A	EastChina	Anhui	Han	Hui	Female	227204678	22712	98	95.99	91.72	86.76	41.14	227028426	99.9224	217182586	95.6	0.0117358	229.2	48.4	7.2961	0.988206	1.01198	0.000343568	3160258	2940066	97750	122442	2.2019	1.49669	156	69	44	9198	3140726	9851	33	123	45
00115011202M22BFF2	A	SouthChina	Guangdong	Han	Cantonese	Female	212039262	21197	97.74	97.03	90.94	88.94	41.21	211664108	99.8231	208259064	98.2	0.0195006	208.9	37.8	6.80557	0.986046	0.966874	0.0019994	3146851	2929581	96338	120932	2.20024	1.45957	172	70	42	9263	3127303	4985	43	118	43
00115011206M17BFF2	A	SouthChina	Guangdong	Han	Hakka	Female	227254444	22718.9	97.95	97.11	91.05	89.09	41.51	226418088	99.632	222538696	97.9	0.0257921	208.5	38.1	7.28251	0.986454	0.964423	0.000714676	3137264	2921858	95393	120013	2.2026	1.46871	155	75	41	9244	3117695	8735	41	112	43
00115011207M16BFF2	A	SouthChina	Guangdong	Han	Cantonese	Female	205187906	20504.3	98.42	97.02	92.12	88.67	41.26	204960264	99.8891	200491926	97.7	0.0173731	233.5	48.1	6.59108	0.985929	0.988014	1.65757e-08	3170579	2951756	96989	121834	2.20063	1.4948	139	75	45	9315	3150827	4691	36	111	48
00115011215M23BFF2	A	CentralChina	Hunan	Han	Xiang	Female	212811158	21273.4	98.31	97.17	92.05	89.35	40.92	212557319	99.8807	208942774	98.2	0.024361	209.7	38.1	6.83217	0.985902	0.97583	8.84399e-08	3160516	2941577	96944	121995	2.20046	1.48203	154	84	46	9311	3140838	6213	40	110	52
00115011217M16BFF2	A	NorthwestChina	Shaanxi	Han	Mandarin	Female	210541274	21044.8	98.13	96.52	91.54	88.04	41.09	210331962	99.9006	204534290	97.1	0.0115492	203.3	38.4	6.76391	0.985432	1.01329	5.55189e-08	3144913	2928568	95730	120615	2.20224	1.48784	149	72	50	9319	3125281	8362	39	117	44
00115011228M17BFF2	A	SouthChina	Guangdong	Han	Cantonese	Female	209642272	20954.1	98.5	97.29	92.48	89.46	41.69	209264735	99.8199	204148710	97.4	0.0169942	225.3	44.1	6.72891	0.98615	0.971019	0.00218036	3139653	2923300	96078	120275	2.2058	1.48037	153	80	42	9517	3119837	5211	36	107	45
00115011233M26BFF2	A	SouthwestChina	Guizhou	Han	Mandarin	Female	220908096	22082	97.91	97.39	91.4	89.79	40.91	220588509	99.8553	216380676	98	0.0184863	202	37.2	7.09161	0.986534	0.96828	0.000114146	3142649	2927238	95408	120003	2.19927	1.49859	167	76	48	9294	3123035	11665	40	97	47
00115011246M25BFF2	A	CentralChina	Hunan	Han	Xiang	Female	233945096	23385.5	97.78	97.02	91.01	88.85	40.86	233592539	99.8493	229861590	98.3	0.0254236	214.5	40	7.50952	0.987593	0.980802	0.00017706	3169851	2949663	97248	122940	2.19945	1.4823	151	74	39	9299	3150212	6585	36	111	48
00115011248M20BFF2	A	CentralChina	Hubei	Han	Mandarin	Female	218705440	21859.8	98.09	97	92.28	89.47	41.14	218505314	99.9085	211773508	96.8	0.0130019	206	38.1	7.02735	0.986292	1.01186	2.14279e-07	3147905	2930281	96179	121445	2.19869	1.45851	158	66	40	9248	3128379	7300	43	111	48
00115011275M18BFF2	A	EastChina	Anhui	Han	Mandarin	Female	208193046	20810	97.8	96.14	90.39	86.58	41.11	207942496	99.8797	205061592	98.5	0.0177923	214.1	40.1	6.68506	0.985449	0.94737	0.000301709	3136089	2919312	96288	120489	2.20278	1.45072	170	81	36	9253	3116552	8604	41	101	46
00115011277M24BFF2	A	SouthChina	Guangdong	Han	Cantonese	Female	193282428	19322.3	98.19	97	91.6	88.74	41	193045142	99.8772	189140830	97.9	0.0182466	206.9	38.9	6.20749	0.984095	0.96584	0.000206031	3117974	2905137	94643	118194	2.20085	1.45615	154	77	40	9376	3098301	7340	35	104	43
00115011278M24BFF2	A	SouthChina	Guangdong	Han	Cantonese	Female	208471548	20838.6	98.31	97.03	92.03	88.93	40.66	208217243	99.878	204680820	98.2	0.0217385	209.1	39	6.69382	0.985732	0.978507	0.00304375	3146942	2929362	96539	121041	2.20113	1.44935	165	71	43	9308	3127347	5203	40	106	45
00115011279M17BFF2	A	SouthwestChina	Sichuan	Han	Mandarin	Female	183534046	18346.8	97.86	96.52	90.66	87.69	42.08	183030459	99.7256	180375268	98.3	0.0179218	210.5	39	5.88564	0.981534	0.959981	1.44381e-07	3125709	2912313	95041	118355	2.20462	1.46579	163	69	46	9174	3106305	6521	35	122	45
00115011295M27BFF2	A	SouthChina	Guangdong	Han	Cantonese	Female	220831498	22064.7	98.41	97.53	92.4	90.64	41.08	218346246	98.8746	214578182	97.2	0.0275104	205.3	37.8	7.02337	0.986166	1.0013	0.000670059	3129054	2914769	95048	119237	2.19945	1.44134	163	75	36	9308	3109633	7012	39	105	47
00115011296M18BFF2	A	EastChina	Jiangxi	Han	Mandarin	Female	213014038	21294.5	97.84	96.41	90.54	87.31	41.03	212828953	99.9131	209347772	98.3	0.0195865	212.3	39	6.84231	0.985682	0.98239	0.000249672	3161909	2943367	96862	121680	2.2008	1.48795	152	84	41	9496	3142160	6422	39	114	48
00115011308M27BFF2	A	SouthChina	Guangdong	Han	Cantonese	Female	195899434	19583.6	97.64	96.79	90.51	88.17	40.74	195421097	99.7558	192251536	98.1	0.0236965	221.2	40.6	6.28307	0.985256	0.99507	3.98421e-05	3136821	2921501	95701	119619	2.20292	1.45012	156	68	46	9118	3117465	5134	40	112	48
00115011323M17BFF2	A	SouthChina	Guangdong	Han	Cantonese	Female	214688822	21454.9	98.19	96.98	91.9	89.08	42.05	213976326	99.6681	209543642	97.6	0.00777206	215.4	41.5	6.87708	0.98472	0.939566	2.09114e-07	3163023	2944404	96966	121653	2.204	1.48742	165	78	43	9459	3143211	8067	42	100	37
00115011327M18BFF2	A	CentralChina	Henan	Han	Mandarin	Female	222350664	22226.3	98.02	96.75	91.24	88.33	40.91	221971171	99.8293	218649746	98.3	0.019324	198.9	35.4	7.13805	0.986567	0.979995	1.39971e-07	3162864	2943720	96903	122241	2.19902	1.50538	160	70	39	9382	3143106	8583	43	106	53
00115011333M18BFF2	A	SouthChina	Guangdong	Han	Cantonese	Female	190527806	19046.3	97.99	96.97	91.38	88.75	41.02	190222060	99.8395	187134830	98.2	0.024183	210.1	38.1	6.11774	0.983706	0.960884	0.00132803	3147809	2931995	95465	120349	2.19962	1.46276	167	78	41	9388	3128109	4804	38	108	42
00115011334M26BFF2	A	SouthChina	Guangdong	Han	Cantonese	Female	208220370	20815	97.9	97.18	91.31	89.13	40.71	207819401	99.8074	204265712	98.1	0.0159327	204.8	37.6	6.68082	0.98597	1.00028	0.000831157	3158127	2939985	96676	121466	2.20407	1.46546	153	69	41	9266	3138554	5006	36	110	47
00115011348M25BFF2	A	SouthChina	Guangdong	Han	Cantonese	Female	209190286	20909.4	98.06	96.62	91.42	88.07	41.61	208947726	99.884	204361126	97.7	0.0162695	241.6	50.4	6.71832	0.985991	0.992223	0.00166489	3146142	2928061	96472	121609	2.19845	1.46854	169	71	50	9460	3126273	4807	38	123	45
00115011354M21BFF2	A	SouthChina	Guangdong	Han	Hakka	Female	225183222	22510.6	98.02	97.1	91.53	89.12	40.93	224820317	99.8388	221139108	98.2	0.0241731	205.7	37.1	7.23007	0.987008	0.988118	0.00210721	3169158	2949374	97017	122767	2.19725	1.48527	169	76	45	9394	3149376	5481	37	108	53
00115011394M26BFF2	A	SouthChina	Guangxi	Han	Hakka	Female	158437516	15839.8	97.91	95.95	91.45	86.99	40.63	158239983	99.8753	154292552	97.4	0.00668772	218.5	39.7	5.08859	0.977896	1.02488	0.0020271	3117456	2905635	94563	117258	2.20025	1.41778	154	76	35	9167	3098156	3360	41	108	39
00115011398F00BFF2	A	SouthChina	Guangdong	Han	Cantonese	Male	192164522	19202	98.38	96.93	92.29	88.74	41.25	191626956	99.7203	188438898	98.1	0.0233464	215.1	43.4	6.1607	0.987102	0.50818	3.81443e-08	3127279	2910347	95757	121175	2.19897	1.48926	153	84	41	9276	3107692	5281	43	113	44
00115011398M17BFF2	A	SouthChina	Guangdong	Han	Cantonese	Female	204480746	20440.6	97.63	95.66	90.48	86.86	40.92	204232372	99.8785	201253430	98.4	0.0192054	222.2	41.5	6.56243	0.98578	0.972339	0.000162105	3161386	2941622	97291	122473	2.19809	1.48598	166	80	48	9321	3141705	5035	44	109	44
00115011406F00BFF2	A	SouthChina	Guangdong	Han	Cantonese	Male	201995970	20189.1	98.25	96.44	91.8	87.5	40.92	201548119	99.7783	194995362	96.5	0.0108437	218.4	42.9	6.47403	0.990392	0.508961	1.05628e-08	3120374	2904292	95796	120286	2.19665	1.46727	158	76	54	9273	3100820	5388	39	109	45
00115011406M17BFF2	A	SouthChina	Guangdong	Han	Cantonese	Female	186035902	18595.8	98.07	96.31	91.28	87.44	41.3	185841419	99.8955	179707952	96.6	0.0104078	210.7	40	5.97556	0.983073	0.989639	2.91086e-08	3162799	2945276	96521	121002	2.20085	1.48405	155	76	46	9418	3142963	6193	39	100	42
00115011420M25BFF2	A	NortheastChina	Heilongjiang	Han	Mandarin	Female	209056718	20890.1	98.32	97.56	92.31	90.56	41.27	208663197	99.8118	204856174	98	0.0236523	187.2	32.9	6.70573	0.984268	0.96597	2.36032e-07	3123363	2910664	94417	118282	2.20429	1.42479	156	78	43	9197	3103804	12505	36	104	45
00115018010M20BFF2	A	SouthChina	Guangdong	Han	Cantonese	Female	247450828	24727.4	98	97.17	92.14	89.72	41.81	246615483	99.6624	241176104	97.5	0.00756047	207.8	39.4	7.92555	0.986199	0.977586	0.0001647	3173716	2952272	97831	123613	2.19836	1.45903	151	97	47	9631	3153653	5268	43	119	44
00115021004M24BFF2	A	NorthChina	Hebei	Han	Mandarin	Female	231336672	23114.7	97.89	96.35	90.89	87.45	40.93	230399706	99.595	227227248	98.2	0.0207714	206.8	41.8	7.40543	0.986991	0.988316	0.00196587	3142190	2924311	96528	121351	2.20135	1.46471	159	75	43	9165	3122816	9079	42	112	50
00115021010F00BFF2	A	EastChina	Fujian	Han	Min	Male	208479688	20832.5	97.63	96.47	90.62	87.62	42.69	207937594	99.74	201624424	96.7	0.0337533	218.4	46.1	6.67045	0.986411	0.495263	2.12644e-07	3141911	2922924	96767	122220	2.1986	1.48852	157	87	39	9491	3122060	6419	33	108	49
00115021010M25BFF2	A	EastChina	Fujian	Han	Min	Female	195542140	19541.8	98.15	96.79	91.69	88.5	41.22	195026633	99.7364	191045382	97.7	0.0148903	238.3	47.9	6.27056	0.985278	0.980354	0.000583003	3173446	2952477	97646	123323	2.19584	1.49134	167	82	35	9426	3153588	4166	45	111	45
00115021017M18BFF2	A	CentralChina	Hubei	Han	Mandarin	Female	217170852	21708.7	97.87	96.77	90.91	88.14	40.9	216961646	99.9037	213604820	98.4	0.022389	216.9	40	6.97756	0.986947	0.994603	0.000622828	3152162	2934463	96434	121265	2.19861	1.48015	173	72	45	9316	3132454	7728	48	105	47
00115021018M17BFF2	A	SouthChina	Guangdong	Han	Hakka	Female	204564414	20450.7	97.83	96.42	90.81	87.38	40.97	204227908	99.8355	200841632	98.2	0.0136941	214.3	39.9	6.56855	0.985926	0.96413	0.0014912	3143087	2925970	96276	120841	2.19928	1.4643	147	78	46	9323	3123531	4973	41	106	47
00115021028M26BFF2	A	SouthChina	Guangdong	Han	Min	Female	185445940	18539.2	97.86	97.14	91.14	88.99	40.87	185129846	99.8295	181713304	98	0.0175136	212	40.2	5.95066	0.983606	0.987983	3.74124e-08	3137588	2922263	95542	119783	2.20319	1.42431	155	80	43	9054	3118332	4649	44	106	41
00115021039M17BFF2	A	NorthwestChina	Gansu	Hui	Mandarin	Female	211563518	21146.3	98.01	96.89	91.5	88.67	41.64	210612176	99.5503	206084468	97.4	0.0143361	228.9	44.2	6.76949	0.986335	0.980991	0.00103227	3178210	2958587	97521	122102	2.2021	1.50596	148	80	40	9447	3158407	8089	41	115	46
00115021064M25BFF2	A	SouthChina	Guangdong	Han	Mandarin	Female	220720504	22060.8	97.75	97.07	91.03	89.3	40.98	220303630	99.8111	216504152	98.1	0.0256378	207.8	38.6	7.07889	0.986905	0.98764	1.86526e-07	3147072	2931196	95782	120094	2.20196	1.45428	152	85	40	9337	3127456	14171	39	105	48
00115021069M27BFF2	A	NortheastChina	Heilongjiang	Han	Mandarin	Female	197923670	19785	98.04	97.12	91.75	89.59	40.97	197648977	99.8612	193824482	97.9	0.0278626	202.5	37.2	6.35512	0.984462	0.979285	1.23491e-07	3117488	2902720	95520	119248	2.19971	1.42162	168	67	42	9192	3097973	8079	37	109	44
00115021085F00BFF2	A	SouthChina	Guangdong	Han	Cantonese	Male	215762098	21563.7	98.4	96.8	92.35	88.36	40.93	215272580	99.7731	209668140	97.2	0.0247617	216.7	45.1	6.91497	0.991694	0.509938	3.26555e-08	3126243	2909427	96032	120784	2.20197	1.50122	179	85	45	9278	3106525	6583	40	102	51
00115021085M16BFF2	A	SouthChina	Guangdong	Han	Cantonese	Female	186046036	18598.1	97.91	96.89	91.04	88.48	40.93	185870126	99.9054	182927974	98.3	0.0247569	216.7	40.3	5.97554	0.983709	0.979117	0.00180401	3150865	2934200	95914	120751	2.19996	1.4665	167	78	47	9384	3131291	4825	28	109	45
00115021086M23BFF2	A	SouthwestChina	Sichuan	Han	Mandarin	Female	190045728	18996.2	98.18	97.08	91.91	89.37	41.75	189713521	99.8252	185345000	97.5	0.0186357	227.2	45.5	6.10081	0.983937	0.981082	9.29483e-08	3151179	2934283	96399	120497	2.19952	1.47606	133	62	50	9338	3131499	6465	41	117	44
00115021087F00BFF2	A	NorthChina	Beijing	Han	Unknown	Male	196578434	19645.9	98.31	96.75	92	88.17	41.32	196036280	99.7242	190620250	97	0.0262063	223	46.2	6.29683	0.989025	0.50597	0.000221822	3132726	2915357	96337	121032	2.19927	1.52001	150	75	40	9253	3113206	9030	40	102	45
00115021087M19BFF2	A	SouthChina	Guangxi	Han	Cantonese	Female	223388108	22331	98.42	97.43	92.48	90.18	41	223107312	99.8743	219285598	98.2	0.0254237	199.3	35.5	7.17151	0.986157	0.98026	0.000864294	3174585	2953553	97450	123582	2.1985	1.47948	154	91	45	9368	3154749	5773	39	106	44
00115021094F00BFF2	A	SouthChina	Guangdong	Han	Mandarin	Male	196350962	19624.9	98.28	96.6	91.89	87.73	41.62	195932711	99.787	192587116	98.1	0.0221873	223	45.5	6.30054	0.987974	0.517636	0.000495979	3130059	2912949	96319	120791	2.19906	1.49248	157	81	42	9269	3110405	7094	39	113	46
00115021094M16BFF2	A	SouthChina	Guangdong	Han	Mandarin	Female	234971782	23486.7	97.98	97.3	91.46	89.69	41.06	234796776	99.9255	230475884	98.1	0.027475	201.1	36.7	7.54867	0.987394	0.980836	0.000214655	3183989	2961195	98488	124306	2.19873	1.53203	170	82	46	9498	3164002	8225	48	117	48
00115021100M18BFF2	A	SouthChina	Guangdong	Han	Cantonese	Female	285990380	28590.3	97.98	96.5	91.72	87.97	41.06	285749643	99.9158	276553332	96.7	0.0123291	226.4	43.8	9.1914	0.988864	1.001	5.74942e-08	3176054	2953371	98238	124445	2.20156	1.46846	167	68	39	9527	3156134	5945	39	102	45
00115021104F00BFF2	A	SouthChina	Guangdong	Han	Min	Male	232947710	23280.3	98.47	97.47	92.71	90.33	41.72	232308853	99.7258	227831834	97.8	0.0271102	199.8	38.7	7.46955	0.990156	0.504962	2.94017e-08	3129958	2911485	96464	122009	2.19947	1.49106	158	82	45	9559	3110014	5215	35	115	52
00115021104M19BFF2	A	SouthChina	Guangdong	Han	Min	Female	214019044	21393.8	98.01	96.98	91.44	88.76	41.05	213692441	99.8474	210160892	98.2	0.0242591	207.7	37.9	6.87147	0.98596	0.985103	8.3924e-07	3161128	2941501	97091	122536	2.199	1.44431	140	71	44	9245	3141715	4707	44	113	47
00115021116M18BFF2	A	SouthChina	Guangdong	Han	Cantonese	Female	224184140	22406.4	97.99	97.32	91.48	89.79	41.33	223513472	99.7008	219915426	98.1	0.0293366	201.3	36.2	7.1863	0.986734	0.978872	0.00111727	3164525	2946132	96796	121597	2.19984	1.49035	156	73	44	9392	3144798	5683	43	112	47
00115021118M21BFF2	A	EastChina	Jiangxi	Han	Gan	Female	222042830	22195.3	97.96	97.42	91.52	89.86	41.12	221816622	99.8981	217935514	98.2	0.0176988	202.2	36.1	7.12583	0.986699	0.96514	6.89304e-08	3162490	2943594	96795	122101	2.20123	1.47039	160	76	42	9438	3142698	6237	38	102	45
00115021128M24BFF2	A	SouthChina	Guangdong	Han	Cantonese	Female	225427892	22534.1	98.28	97.27	92.29	89.92	41.98	223645066	99.2091	218082698	96.7	0.0181849	215.6	40.7	7.19032	0.986358	0.982433	1.63862e-08	3164228	2944935	97258	122035	2.20312	1.45509	155	70	39	9228	3144621	5649	43	115	51
00115021129M19BFF2	A	SouthChina	Guangdong	Han	Xiang	Female	216456038	21639.2	98.34	97.23	92.17	89.53	41.04	216017888	99.7976	212387776	98.1	0.0203491	204.3	36.4	6.94621	0.986044	0.983526	8.23968e-07	3157815	2939440	96782	121593	2.19938	1.46703	145	73	44	9409	3138040	6215	37	117	49
00115021131M13BFF2	A	SouthwestChina	Sichuan	Han	Mandarin	Female	220661824	22053.5	98.05	96.53	91.44	87.61	41.45	220146822	99.7666	215365612	97.6	0.0135362	233.4	47.9	7.07612	0.986847	0.980764	0.00146402	3162108	2942648	97072	122388	2.19949	1.46169	155	88	53	9395	3142225	6585	38	113	42
00115021144M25BFF2	A	SouthChina	Guangdong	Han	Cantonese	Female	169028002	16897	97.95	95.82	91.5	86.58	41.2	168845864	99.8922	164444636	97.3	0.00587518	220.8	40.8	5.43022	0.980582	0.983059	1.91354e-07	3105838	2894909	93734	117195	2.20505	1.44892	149	70	40	9139	3086583	4347	39	110	47
00115021153M17BFF2	A	SouthChina	Guangdong	Han	Cantonese	Female	196412010	19633.1	98.21	97.17	92.06	89.43	41.37	195900210	99.7394	191119828	97.3	0.0137245	219.1	43.4	6.29927	0.984882	0.986257	0.000122433	3142224	2926055	95927	120242	2.20106	1.47645	148	72	44	9320	3122587	4929	33	116	46
00115021157F00BFF2	A	EastChina	Jiangsu	Han	Cantonese	Male	211858758	21178.7	98.42	97.05	92.49	89.08	41.2	210979632	99.585	206851190	97.6	0.0247582	217.4	42.3	6.78065	0.990705	0.505243	1.0469e-07	3137455	2919122	96676	121657	2.19755	1.48253	160	94	42	9459	3117675	6647	30	111	51
00115021157M16BFF2	A	SouthChina	Guangdong	Han	Cantonese	Female	178393510	17832.4	97.86	96.72	90.89	88.01	40.84	178075723	99.8219	175320538	98.3	0.0218101	217.5	40.8	5.72262	0.983013	0.996993	5.15101e-08	3148697	2930910	96424	121363	2.197	1.49644	166	92	43	9300	3128891	4811	41	109	44
00115021165M16BFF2	A	SouthChina	Guangdong	Han	Mandarin	Female	209761260	20966.3	97.96	97.16	91.32	89.27	40.88	209484550	99.8681	205592556	98	0.027124	207.6	38.8	6.73282	0.985887	0.99039	3.04613e-08	3162460	2943943	96810	121707	2.19894	1.46006	157	78	43	9281	3142970	5530	35	116	43
00115021183F00BFF2	A	SouthChina	Guangdong	Han	Cantonese	Male	212366386	21225.6	98.17	96.84	91.52	88.41	41.57	211876650	99.7694	208026344	98	0.0242929	223.4	45	6.81186	0.991042	0.511161	6.17432e-08	3119900	2906097	95209	118594	2.2001	1.46894	151	68	41	9300	3100311	8128	43	109	49
00115021183M19BFF2	A	SouthChina	Guangdong	Han	Cantonese	Female	162497086	16244.8	98.03	95.83	90.45	85.15	40.88	162192149	99.8123	160202084	98.6	0.0145488	229.6	44	5.21395	0.980106	0.964877	0.00113298	3094686	2885761	93219	115706	2.20347	1.4547	141	73	46	9108	3075388	6294	36	117	47
00115021184M17BFF2	A	SouthChina	Guangdong	Han	Cantonese	Female	223618442	22354.2	97.83	96.8	90.78	88.19	40.98	223435596	99.9182	219913048	98.3	0.0231653	218.3	40.4	7.17967	0.986737	0.978658	1.25341e-07	3151389	2932346	96896	122147	2.20431	1.46488	156	81	49	9381	3131688	5103	38	103	44
00115021190M27BFF2	A	SouthChina	Guangdong	Han	Cantonese	Female	207034052	20695.9	97.91	96.75	91.3	88.55	40.95	206725957	99.8512	202473682	97.8	0.0275849	212.5	40.9	6.64589	0.985813	0.961082	1.85799e-08	3153943	2938248	95886	119809	2.20428	1.46939	147	86	45	9423	3134036	7625	40	111	45
00115021195F00BFF2	A	SouthChina	Guangdong	Han	Cantonese	Male	227766574	22764.1	97.77	96.78	91.09	88.44	41.98	227078997	99.6981	222323432	97.6	0.03213	211.5	42	7.2956	0.988854	0.495299	0.000828462	3144639	2926206	96763	121670	2.20135	1.51058	155	79	42	9290	3124967	6111	38	109	42
00115021195M20BFF2	A	SouthChina	Guangdong	Han	Cantonese	Female	216296280	21618.6	98.24	97.38	92.14	90.13	41.3	215999952	99.863	211041398	97.6	0.0179691	220.3	43.9	6.94362	0.986684	0.987053	1.53702e-08	3185669	2964248	97827	123594	2.19882	1.49392	167	90	39	9481	3165652	5582	41	121	51
00115021197F00BFF2	A	SouthChina	Guangdong	Han	Cantonese	Male	181389894	18123.3	97.74	96.54	90.95	87.8	41.31	180770547	99.6586	175749664	96.9	0.0319274	217.9	46	5.80121	0.985062	0.501689	0.000212866	3118401	2904369	95147	118885	2.19878	1.49337	165	70	48	9191	3098999	5890	40	104	46
00115021210M23BFF2	A	SouthChina	Guangdong	Han	Cantonese	Female	219797928	21971.1	98.12	97.06	91.73	89	41.56	219553225	99.8887	214529554	97.6	0.0201019	228.4	44.9	7.05956	0.987157	0.97486	0.000945516	3164012	2943608	97503	122901	2.19893	1.46347	157	76	44	9437	3144076	4890	40	109	50
00115021219F00BFF2	A	SouthChina	Guangdong	Han	Unknown	Male	195180928	19505.8	98.21	96.47	91.76	87.6	41.23	194758792	99.7837	187524122	96.1	0.00905228	214.9	42.7	6.25637	0.989534	0.499498	0.0026202	3121433	2904489	96273	120671	2.20489	1.48053	155	78	42	9247	3102037	7081	35	100	53
00115021219M17BFF2	A	SouthChina	Guangdong	Han	Cantonese	Female	176790640	17673	97.97	96.9	91.22	88.52	41.05	176497035	99.8339	173324122	98	0.0280561	213.5	39.5	5.67545	0.982142	0.985514	7.26527e-07	3145411	2928153	96296	120962	2.19878	1.48166	155	78	42	9348	3125901	4931	41	107	46
00115021224M20BFF2	A	SouthwestChina	Guizhou	Han	Mandarin	Female	222249140	22201.9	98.06	96.67	91.53	88.48	41.17	221679987	99.7439	217192084	97.7	0.0215668	189.5	40.1	7.12282	0.985725	0.983543	3.40746e-08	3142317	2925021	96150	121146	2.19997	1.45595	148	72	44	9348	3122764	6484	33	114	50
00115021227M17BFF2	A	SouthwestChina	Sichuan	Han	Mandarin	Female	213090722	21281.4	98.11	96.81	91.79	89.07	41.23	212587110	99.7637	207677746	97.5	0.0260887	194.9	41.9	6.8282	0.985644	0.973076	0.00064474	3140974	2923765	95832	121377	2.20196	1.46741	171	75	44	9227	3121506	6092	34	98	46
00115021253M19BFF2	A	SouthChina	Guangdong	Han	Cantonese	Female	216769032	21670.3	97.81	97.03	90.91	88.59	40.95	216405521	99.8323	213219052	98.4	0.0163827	216.7	39.5	6.95747	0.986602	0.976186	0.000238197	3171982	2951889	97329	122764	2.197	1.47394	151	77	37	9295	3152283	4708	41	105	48
00115021262M17BFF2	A	SouthChina	Guangdong	Han	Cantonese	Female	200736182	20063	98.15	96.53	91.58	88.04	41.54	200545908	99.9052	194647600	97	0.0115473	204.3	38.6	6.44986	0.98418	0.978116	8.989e-07	3138510	2922360	95961	120189	2.19941	1.44044	134	77	43	9373	3118872	5802	33	106	52
00115021263M18BFF2	A	SouthChina	Guangdong	Han	Cantonese	Female	193387406	19326.9	98.12	96	91	87.98	41.48	193203253	99.9048	185403208	95.9	0.0113851	204.6	39.6	6.20842	0.984212	0.98054	2.43224e-07	3154500	2938194	95999	120307	2.20046	1.49347	170	80	38	9347	3134706	9207	34	103	46
00115021264M24BFF2	A	SouthChina	Guangdong	Han	Mandarin	Female	195563960	19549.2	98.2	96.8	92.03	88.81	41.23	195375796	99.9038	189129386	96.7	0.00956897	203.2	40.2	6.2845	0.984111	0.996015	0.000802802	3135004	2919494	95528	119982	2.20291	1.44944	153	79	47	9370	3115285	4477	39	106	45
00115028005M26BFF2	A	NorthChina	Shanxi	Han	Mandarin	Female	197783040	19759.7	97.51	95.24	90.06	85.71	41.99	197079829	99.6445	194078662	98.1	0.0206025	203.3	41.4	6.32918	0.982898	0.959819	0.0009955	3137023	2921201	95725	120097	2.2003	1.46146	149	69	40	9333	3117386	7479	35	111	45
00115031007M18BFF2	A	NorthwestChina	Xinjiang	Han	Mandarin	Female	191441252	19135.7	98.22	97.23	91.81	89.46	41.11	191269037	99.91	187736962	98.1	0.0199598	199.9	36.2	6.14657	0.983527	0.965395	1.00532e-07	3153211	2936286	96312	120613	2.20033	1.48749	167	81	47	9480	3133384	7981	38	121	38
00115031016F00BFF2	A	NortheastChina	Liaoning	Han	Unknown	Male	206189880	20605.3	98.35	97	92.36	89.11	40.81	205700423	99.7626	200603486	97.3	0.0101604	203.9	39.4	6.61169	0.989978	0.512305	5.22456e-08	3136249	2917605	97042	121602	2.20177	1.50751	163	74	47	9318	3116586	7028	37	114	42
00115031016M22BFF2	A	SouthChina	Guangdong	Han	Min	Female	199331580	19928.5	97.71	96.74	90.71	88.01	40.74	198921060	99.7941	196033124	98.3	0.021564	220	40	6.39695	0.985733	1.00153	0.000176615	3155118	2935643	97205	122270	2.19714	1.47208	153	78	48	9325	3135502	4276	39	106	48
00115031023M17BFF2	A	SouthChina	Guangdong	Han	Cantonese	Female	224391898	22430.1	98.08	96.35	91.33	87.53	40.99	224171287	99.9017	218919334	97.6	0.0122003	211.2	39.6	7.21076	0.985869	1.01553	0.000690768	3159462	2940944	96674	121844	2.19974	1.47265	154	82	51	9270	3139928	5074	41	116	47
00115031042M26BFF2	A	SouthwestChina	Sichuan	Han	Cantonese	Female	225040036	22491.4	97.86	97.05	91.18	89.3	41.03	224688570	99.8438	220646542	98	0.030468	207.6	38.9	7.22376	0.987023	0.968837	0.000219635	3133234	2918156	95230	119848	2.20228	1.46982	154	73	47	9318	3113682	11713	44	108	46
00115031051F00BFF2	A	CentralChina	Hubei	Han	Unknown	Male	225875596	22573.5	97.8	96.87	91.22	88.65	41.51	225257222	99.7262	220563290	97.6	0.0346636	211.4	42.4	7.23671	0.989756	0.515004	1.52743e-07	3148070	2927874	97376	122820	2.20244	1.49348	156	78	48	9349	3128412	7189	35	113	53
00115031051M18BFF2	A	SouthChina	Guangxi	Han	Cantonese	Female	204151372	20408.7	97.84	97.23	91.09	89.24	40.97	203898323	99.876	200337176	98.1	0.0167725	209.9	38.4	6.55213	0.985791	0.976501	3.37442e-07	3159565	2939448	97125	122992	2.20207	1.49258	161	81	47	9406	3139810	4769	44	109	43
00115031085M20BFF2	A	NorthwestChina	Shaanxi	Han	Mandarin	Female	200722274	20064	98.09	96.21	91.36	87.14	40.46	200525145	99.9018	196284052	97.8	0.0113624	210	39.4	6.4512	0.983995	1.01543	1.64022e-07	3158710	2941479	96219	121012	2.19944	1.48845	157	73	45	9230	3139144	7472	37	105	55
00115031099F00BFF2	A	SouthChina	Guangdong	Han	Cantonese	Male	216486458	21638.2	98.09	96.91	91.49	88.4	41.3	216237706	99.8851	211664454	97.8	0.0280662	238	49.9	6.95168	0.990172	0.500454	0.000376515	3142495	2924085	96783	121627	2.2015	1.48036	158	85	37	9352	3122732	5567	33	125	50
00115031109M18BFF2	A	SouthChina	Guangdong	Han	Min	Female	217791690	21766.9	98.07	96.75	91.46	88.38	41.05	217284506	99.7671	212624310	97.6	0.0154026	236.4	48.3	6.98722	0.987077	0.982728	2.05843e-08	3167761	2947831	97323	122607	2.19831	1.48719	172	81	38	9346	3148145	5014	39	106	50
00115031113M18BFF2	A	SouthChina	Guangxi	Zhuang	Mandarin	Female	230871540	23071.8	98.01	96.81	91.38	88.69	41.22	229858237	99.5611	226219490	98	0.0224201	194.6	37.4	7.3906	0.98676	0.980314	0.000541146	3144677	2926641	96347	121689	2.20173	1.48023	153	84	42	9398	3124884	5476	40	127	48
00115031130M18BFF2	A	SouthChina	Guangdong	Han	Min	Female	194396490	19431.8	97.85	97.16	91.28	89.38	40.84	194103021	99.849	190924846	98.2	0.0236288	205.7	37.5	6.2394	0.984244	0.999416	0.000443454	3128682	2913187	95617	119878	2.20226	1.44382	155	72	43	9346	3109066	5738	37	102	53
00115031148M23BFF2	A	SouthChina	Guangdong	Han	Cantonese	Female	203970964	20373.2	97.7	95.87	90.78	87.36	41.95	201813954	98.9425	198006370	97.1	0.0247688	182.7	37.6	6.46976	0.982668	0.969	0.000450097	3121688	2907581	94949	119158	2.20127	1.43404	154	86	39	9183	3102314	4848	40	94	42
00115031171M20BFF2	A	SouthwestChina	Chongqing	Han	Mandarin	Female	190742176	19063.4	97.9	96.03	91.14	86	41.12	190549394	99.8989	182831400	95.9	0.015784	220.3	46.2	6.12479	0.984884	0.983014	2.77877e-08	3165092	2946572	97307	121213	2.20149	1.48821	168	70	45	9333	3145499	8290	42	99	45
00115031174M21BFF2	A	SouthChina	Guangdong	Han	Cantonese	Female	197780438	19757.3	97.53	95.12	90.12	85.48	42.12	197243856	99.7287	193562498	97.9	0.0201004	201.8	41.6	6.33275	0.983467	0.959817	0.000681252	3151718	2935343	95895	120480	2.2033	1.45967	143	84	41	9346	3131964	5481	38	112	42
00115031175M17BFF2	A	SouthChina	Guangdong	Han	Min	Female	208972068	20874.1	97.94	96.03	91.05	86.78	41.36	208497154	99.7727	204532658	97.9	0.020707	202.3	43.2	6.69737	0.985689	0.969898	0.00212442	3153168	2935754	96220	121194	2.20013	1.47251	155	75	45	9436	3133453	5371	41	115	46
00115031179M26BFF2	A	SouthChina	Guangdong	Han	Cantonese	Female	203382252	20330.2	97.87	96.61	91.11	88.05	40.95	203212467	99.9165	199687672	98.2	0.0251967	218.2	41.3	6.53285	0.985457	0.968289	0.000618044	3146182	2928915	96351	120916	2.20262	1.45332	150	73	48	9260	3126652	5810	37	102	45
00115031188F00BFF2	A	SouthChina	Guangdong	Han	Unknown	Male	201507912	20134.1	97.61	96.65	90.83	88.07	41.16	200904767	99.7007	197428420	98	0.0238246	212.9	43.1	6.4477	0.987733	0.503006	0.000261625	3110419	2894143	95586	120690	2.20292	1.44854	155	79	41	9250	3090922	5428	37	111	44
00115031188M18BFF2	A	SouthChina	Guangdong	Han	Mandarin	Female	180258094	18018.5	97.93	96.04	91.56	87.24	41.03	180040915	99.8795	175499144	97.4	0.00658401	212.5	39.4	5.78769	0.982104	1.00737	7.2475e-07	3136366	2919863	95789	120714	2.20122	1.45114	163	82	42	9188	3116963	4046	36	104	46
00115031206M19BFF2	A	SouthChina	Guangdong	Han	Cantonese	Female	216417730	21631.1	97.87	97.33	91.39	89.86	40.7	216222753	99.9099	211996290	98	0.0259425	201.5	38.1	6.94955	0.986048	0.97748	7.89162e-08	3150588	2932951	96236	121401	2.20152	1.45193	162	93	41	9338	3130859	5550	40	111	44
00115031260M18BFF2	A	SouthChina	Guangdong	Han	Cantonese	Female	243079232	24300.7	98.2	96.78	91.95	88.62	40.9	242804657	99.887	236853876	97.4	0.0088698	206.2	37.8	7.81127	0.987164	1.0165	0.000467378	3173272	2952427	97492	123353	2.19883	1.46786	158	75	44	9454	3153315	5307	43	103	52
00115031267M17BFF2	A	SouthChina	Guangdong	Han	Cantonese	Female	215754106	21567.1	97.8	97.02	91.08	88.92	40.86	215428179	99.8489	211569692	98.1	0.0234921	209.8	38.6	6.92505	0.98649	0.996662	1.61822e-07	3172299	2952534	97311	122454	2.2001	1.47598	145	75	38	9366	3152600	5282	39	112	42
00115031268M18BFF2	A	SouthChina	Guangdong	Han	Min	Female	226252902	22616.6	97.86	96.86	91.12	88.75	41.12	225944888	99.8639	222114578	98.2	0.0252531	212.9	39.6	7.25984	0.98729	0.981422	0.00148789	3156806	2937811	97156	121839	2.19745	1.46986	143	81	41	9343	3137017	5527	35	113	35
00115031271F00BFF2	A	SouthChina	Guangdong	Han	Mandarin	Male	207712506	20755.4	98.14	97	91.92	89.26	41.02	207106636	99.7083	199833326	96.2	0.0124301	200.9	39.6	6.65363	0.990483	0.510332	4.08654e-07	3142260	2923839	96553	121868	2.20046	1.47941	154	74	36	9364	3122483	5621	34	103	51
00115031271M16BFF2	A	NorthChina	Hebei	Han	Mandarin	Female	203943562	20387.4	97.69	96.85	90.68	88.36	40.73	203546932	99.8055	200377418	98.3	0.0233339	217.5	40.4	6.5432	0.985638	0.994662	0.00123409	3167934	2947911	97254	122769	2.19806	1.4704	149	82	41	9389	3148259	7571	32	116	51
00115031280M16BFF2	A	SouthChina	Guangdong	Han	Cantonese	Female	190555130	19048.9	97.69	96.88	90.83	88.82	40.92	190315269	99.8741	186477626	97.9	0.0243004	214.1	41.3	6.11725	0.984297	0.989714	2.12733e-07	3138098	2922571	95938	119589	2.19781	1.45524	158	82	47	9255	3118563	5422	39	102	43
00115031306M23BFF2	A	EastChina	Fujian	Han	Min	Female	214508074	21433.2	97.56	95.62	90.17	86.56	40.88	213896616	99.7149	210848452	98.3	0.0204843	202	41.9	6.87111	0.986044	0.992381	1.30924e-08	3145715	2928538	96069	121108	2.20038	1.45473	146	73	42	9330	3126146	5647	37	100	46
00115031307M22BFF2	A	SouthChina	Guangdong	Han	Hakka	Female	188390266	18831.5	97.7	96.22	90.47	86.97	40.84	188250458	99.9258	185260992	98.3	0.026254	232.4	46.7	6.04954	0.984151	0.969821	6.7485e-07	3149031	2931879	96368	120784	2.20184	1.47071	163	71	42	9408	3129307	5272	46	107	47
00115031310M25BFF2	A	EastChina	Shandong	Han	Mandarin	Female	222723572	22249.5	96.89	96.04	89.42	87.31	42.25	221935877	99.6463	217542914	97.7	0.0245981	188.2	39.9	7.11485	0.984943	0.967453	0.00190662	3173941	2955285	96814	121842	2.20363	1.47993	166	85	47	9434	3153980	9112	37	116	52
00115031327M19BFF2	A	SouthChina	Guangdong	Han	Min	Female	172203354	17212.4	98.14	96.62	91.69	88.16	40.65	171977406	99.8688	168158820	97.7	0.00893558	214.6	40.5	5.5316	0.98117	1.01395	0.000521399	3099798	2887989	94130	117679	2.2029	1.407	154	70	39	9140	3080500	4189	34	114	55
00115031360M19BFF2	A	EastChina	Jiangxi	Han	Gan	Female	176516706	17635.2	97.58	95.66	90.25	86.71	41.15	176055257	99.7386	173222272	98.1	0.0196062	199.4	41.9	5.65372	0.981307	0.986014	3.67847e-06	3116941	2903352	94569	119020	2.20189	1.46511	154	69	43	9225	3097533	5464	37	99	42
00115031363F00BFF2	A	SouthChina	Guangdong	Han	Mandarin	Male	288311756	28818.6	99.03	98.72	96.24	94.74	40.9	287510448	99.7221	281912182	97.8	0.0090756	229.7	51	9.23888	0.994962	0.505807	0.00060358	3168126	2945073	98656	124397	2.1989	1.47062	160	77	47	9404	3148355	7006	35	113	49
00115031363M17BFF2	A	SouthChina	Hainan	Han	Mandarin	Female	204510834	20420.5	98.05	96.63	91.49	88.4	41.39	203720874	99.6137	200409720	98	0.0208716	192.3	39	6.53799	0.984422	0.983926	0.00061391	3152347	2934679	96300	121368	2.1997	1.48865	153	92	48	9275	3132788	5973	36	113	43
00115031389M25BFF2	A	NortheastChina	Jilin	Han	Mandarin	Female	225850888	22574.4	98.36	97.16	92.19	89.38	41.23	225555558	99.8692	220427198	97.6	0.0182462	225.3	44.2	7.2519	0.987573	0.977722	0.000261458	3163931	2944264	97321	122346	2.19949	1.48141	168	77	42	9307	3144221	8680	38	106	41
00115031393M16BFF2	A	SouthChina	Guangdong	Han	Cantonese	Female	151881586	15180.8	97.83	95.3	91.15	85.58	40.94	151649240	99.847	147272644	97	0.00652059	227.3	49.7	4.87339	0.97576	1.03373	0.00121819	3084043	2874754	93345	115944	2.19929	1.43258	153	77	46	9060	3064885	3311	34	102	40
00115031395M19BFF2	A	SouthChina	Guangdong	Han	Min	Female	256769660	25658.6	97.43	95.48	89.85	86.25	41.31	255780240	99.6147	251457730	97.9	0.0226399	201.5	40.6	8.21733	0.987653	0.972023	0.000408264	3173351	2952836	97615	122900	2.19941	1.47878	156	67	44	9286	3153728	5361	36	116	48
00115031398M26BFF2	A	SouthChina	Guangdong	Han	Min	Female	208840768	20868.2	98.29	97.16	91.92	89.49	41.51	207259350	99.2428	203765126	97.6	0.02595	213.7	39.6	6.66517	0.985099	0.982331	0.00159546	3149749	2932652	96251	120846	2.20084	1.50532	136	69	46	9343	3130077	5005	31	112	48
00115038004M20BFF2	A	EastChina	Jiangxi	Han	Mandarin	Female	193045420	19281.3	97.95	96.4	91.06	87.63	40.99	192231099	99.5782	189160144	98	0.0233516	204	43	6.17238	0.983473	0.987256	0.000936183	3134592	2921383	94882	118327	2.20307	1.44623	154	79	34	9269	3115138	10874	40	111	43
00115041023M19BFF2	A	SouthChina	Guangdong	Han	Mandarin	Female	153132770	15308.3	98.2	96.78	91.93	88.54	41.18	153006494	99.9175	149353564	97.5	0.00778868	206.8	38.6	4.92208	0.976212	0.98852	0.000143906	3130006	2915876	95425	118705	2.20292	1.47362	145	74	46	9249	3110555	4855	34	106	43
00115041070M17BFF2	A	EastChina	Jiangxi	Han	Gan	Female	180128326	17996.6	98.39	97.07	92.35	89.28	41.42	179363470	99.5754	175546142	97.5	0.0178068	222	44.8	5.76449	0.983202	0.993959	0.000779647	3130915	2915331	95686	119898	2.20173	1.43637	152	76	45	9200	3111537	5608	32	106	49
00115041098M21BFF2	A	SouthChina	Guangdong	Han	Cantonese	Female	207637250	20755	94.99	96.33	87.39	87.87	41.6	207306631	99.8408	203426416	98	0.0280952	205.9	38.2	6.51291	0.985417	0.973349	0.000891355	3145814	2929075	96020	120719	2.20034	1.45884	179	81	45	9239	3126307	5379	39	115	44
00115041105F00BFF2	A	SouthChina	Guangdong	Han	Cantonese	Male	199856136	19976	98.37	96.15	92.53	87.57	40.88	199435934	99.7897	194069732	97.1	0.0126406	200.6	38.6	6.40459	0.989143	0.513711	0.000646961	3116742	2901045	95421	120276	2.19902	1.45695	158	76	43	9334	3097126	4739	36	119	52
00115041105M17BFF2	A	SouthChina	Guangdong	Han	Cantonese	Female	188512066	18843.2	97.62	96.91	90.64	88.91	40.92	188186644	99.8274	183801502	97.5	0.0248847	211.6	39.3	6.04678	0.98392	0.985843	0.000284001	3158109	2940445	96319	121345	2.1992	1.48003	155	70	38	9236	3138527	5170	34	116	39
00115041112M22BFF2	A	SouthwestChina	Sichuan	Han	Mandarin	Female	209444780	20923.8	96.86	96.26	89.31	87.75	41.52	208713125	99.6507	205038260	97.9	0.0228169	190.1	37	6.69527	0.985101	0.981699	0.00075584	3150600	2933784	95905	120911	2.19764	1.47629	153	69	37	9334	3130954	7014	38	122	49
00115041136M16BFF2	A	EastChina	Fujian	Han	Cantonese	Female	230822646	23071.7	97.68	97	90.84	89.15	41	230615662	99.9103	226178214	98	0.0269164	209.9	39.3	7.41061	0.986427	0.976802	0.000678366	3124635	2907175	96263	121197	2.19819	1.32356	151	83	36	9231	3105266	5433	42	126	43
00115041137M19BFF2	A	SouthChina	Guangdong	Han	Mandarin	Female	200644280	20055.4	97.76	96.84	91.05	88	40.82	200377282	99.8669	196568320	98	0.0237709	208.3	39.3	6.43885	0.985053	0.981815	6.99827e-07	3136388	2919277	96128	120983	2.20066	1.42056	168	77	38	9276	3116775	5295	34	108	43
00115041147M23BFF2	A	SouthChina	Guangdong	Han	Cantonese	Female	225674528	22547.1	98.13	96.47	91.6	88.23	40.7	225119861	99.7542	221060692	98	0.0322666	201.2	38.1	7.23494	0.986606	0.983786	0.000317258	3168647	2949489	97177	121981	2.20037	1.46929	170	71	39	9307	3149050	5130	36	104	42
00115041149M21BFF2	A	SouthChina	Guangdong	Han	Cantonese	Female	208835974	20877.5	94.95	96.05	87.14	87.07	41.31	208459879	99.8199	204482322	97.9	0.0291752	212	38.8	6.55205	0.986058	0.977752	0.0029822	3165275	2947454	96439	121382	2.19758	1.50431	147	77	42	9431	3145597	4875	40	98	45
00115041150F00BFF2	A	SouthChina	Guangdong	Han	Cantonese	Male	210347084	21024.3	98.09	95.38	91.17	84.46	40.95	210014715	99.842	204414868	97.2	0.0125993	247.1	48.6	6.74994	0.991756	0.503996	0.000354369	3139635	2921623	96633	121379	2.19956	1.47121	176	83	43	9369	3120028	7173	39	108	47
00115041150M18BFF2	A	SouthChina	Guangdong	Han	Cantonese	Female	212783064	21267.4	97.74	97.05	91.01	89.28	40.9	212589606	99.9091	208716244	98.1	0.0280794	208.9	39.4	6.82749	0.9861	0.971681	0.00139244	3161213	2942717	96544	121952	2.20106	1.47079	161	65	45	9311	3141484	6015	39	106	47
00115041177F00BFF2	A	NorthwestChina	Shaanxi	Han	Unknown	Male	179700768	17961.3	98.37	96.26	92.51	87.76	41.05	179416189	99.8416	174864330	97.3	0.00944428	201.9	38.7	5.76752	0.985788	0.50706	0.000612849	3113665	2898631	95291	119743	2.19619	1.5011	151	83	48	9105	3094369	6868	42	107	50
00115041177M24BFF2	A	NorthwestChina	Shaanxi	Han	Mandarin	Female	209178924	20900.5	98.28	97.19	91.85	89.53	40.84	208015522	99.4438	204979128	98	0.0262301	218.9	41.3	6.69042	0.985304	0.990175	0.000123792	3172441	2952200	97619	122622	2.2031	1.48351	146	86	45	9343	3152754	7674	41	115	45
00115041265M24BFF2	A	SouthChina	Guangdong	Han	Cantonese	Female	209786782	20965.6	98.21	96.72	91.73	88.18	40.91	208787520	99.5237	205960128	98.2	0.0277975	220.1	41.9	6.71528	0.985131	0.997585	0.000441009	3150306	2933618	96298	120390	2.20095	1.46923	167	83	41	9243	3130824	4926	37	101	47
00115041273M18BFF2	A	SouthChina	Guangxi	Han	Mandarin	Female	233300860	23318.8	98.03	97.23	91.74	89.85	41.03	233016291	99.878	228741816	98	0.0301582	202.8	37.7	7.48937	0.986987	0.979018	0.000773889	3149498	2932805	95961	120732	2.19936	1.46914	158	85	48	9318	3129845	9090	37	114	44
00115041281F00BFF2	A	SouthChina	Guangdong	Han	Hakka	Male	209156038	20907.5	98.08	96.86	91	88.29	42.28	208298391	99.5899	204582632	97.8	0.0282803	239.1	50.4	6.69345	0.981266	0.505391	3.31264e-07	3109670	2894284	95779	119607	2.20008	1.44807	153	73	55	9249	3090180	4814	33	110	50
00115041281M17BFF2	A	SouthChina	Guangdong	Han	Hakka	Female	181372166	18130.5	98.13	95.95	91.19	86.11	40.95	180808763	99.6894	177428800	97.8	0.0143122	252.6	52.7	5.81466	0.983692	1.00028	0.00120686	3153400	2935422	96663	121315	2.20075	1.46976	150	74	50	9495	3133363	4683	38	116	54
00115041383F00BFF2	A	EastChina	Jiangsu	Han	Unknown	Male	214603068	21443.5	98.06	96.91	91.38	88.49	41.55	214354702	99.8843	207850520	96.9	0.0292657	232.4	54.5	6.88099	0.989573	0.501706	1.89611e-08	3127757	2911538	95794	120425	2.20104	1.47123	162	78	44	9265	3108251	9130	33	106	45
00115041383M27BFF2	A	SouthChina	Guangdong	Han	Min	Female	243292676	24318.6	98.21	97.14	92.31	89.49	40.52	243124584	99.9309	234879850	96.5	0.026222	210.2	39	7.81653	0.988121	1.03057	5.46475e-07	3186352	2963137	98415	124800	2.19903	1.50016	141	76	39	9324	3166728	5096	35	108	45
00115048007M26BFF2	A	SouthChina	Guangdong	Han	Cantonese	Female	214638304	21453.7	98.45	97.31	92.56	89.88	41.26	214200451	99.796	208962252	97.4	0.0181431	218.5	42.6	6.88764	0.986473	0.970833	6.26763e-07	3169203	2949421	97271	122511	2.20157	1.4847	162	75	41	9414	3149421	6268	33	108	46
00115049005M19BFF2	A	SouthChina	Guangdong	Han	Cantonese	Female	222473380	22239.2	97.79	97.1	91.21	89.52	41.12	222305422	99.9245	217184282	97.6	0.0253486	200.5	37.3	7.14558	0.986326	0.96226	1.50041e-07	3160577	2940520	97189	122868	2.2013	1.47617	171	77	43	9394	3140849	5583	44	122	47
00115051057F00BFF2	A	SouthChina	Guangdong	Han	Cantonese	Male	207093594	20696.1	98.11	96.84	91.77	88.81	41.14	206700832	99.8103	199031076	96.1	0.0103491	202.8	41.3	6.64073	0.990566	0.503104	0.000141399	3126193	2909493	95832	120868	2.19747	1.48046	163	73	48	9233	3106722	6569	37	113	44
00115051057M19BFF2	A	SouthChina	Guangdong	Han	Cantonese	Female	195539372	19541.1	98.3	97.01	92.09	88.58	41.06	194835603	99.6401	191640926	98	0.00982656	221.9	43.9	6.26354	0.984722	0.982433	0.00194928	3156247	2936286	97245	122716	2.20245	1.49075	244	76	87	9215	3136187	5310	37	111	41
00115051070F00BFF2	A	EastChina	Jiangxi	Han	Unknown	Male	230233516	23011.1	97.58	95.98	90.58	87.29	41.17	229935249	99.8705	220610458	95.8	0.0191524	208.5	40.7	7.38009	0.993414	0.503931	7.38925e-08	3126592	2907891	96740	121961	2.19851	1.48007	166	73	42	9128	3107220	9070	37	114	39
00115051070M17BFF2	A	EastChina	Jiangxi	Han	Mandarin	Female	204428268	20435.6	94.9	96.13	87.07	87.39	41.42	204228580	99.9023	199879666	97.8	0.0286987	208	40.3	6.41804	0.98517	0.955933	0.0009025	3155362	2936519	96929	121914	2.19875	1.50161	154	73	44	9208	3135808	6955	39	113	46
00115051072F00BFF2	A	SouthChina	Guangdong	Han	Cantonese	Male	227703912	22760.6	97.84	96.77	90.95	87.93	42.22	227127654	99.7469	221404042	97.2	0.0454999	229.8	48.8	7.29103	0.991093	0.497342	0.000284498	3143498	2923728	97316	122454	2.19967	1.50261	160	79	43	9349	3123787	5188	41	120	45
00115051072M18BFF2	A	SouthChina	Guangdong	Han	Cantonese	Female	161126424	16106.5	97.88	95.46	91.3	85.78	40.92	160937858	99.883	157045398	97.5	0.006096	222.6	43	5.17451	0.978373	1.00274	0.000324921	3145878	2928896	96557	120425	2.19942	1.42564	140	80	51	9205	3126436	3475	36	114	47
00115051077M18BFF2	A	SouthChina	Guangdong	Han	Cantonese	Female	182438258	18220.9	96.87	96.54	88.73	87.92	41.01	182150855	99.8425	178839272	98	0.0198837	200.8	39.4	5.84465	0.982186	0.978747	0.000261094	3140549	2924833	95646	120070	2.20347	1.45218	157	74	47	9268	3121111	5469	30	117	53
00115051110M25BFF4	A	SouthChina	Guangdong	Han	Cantonese	Female	214886788	21477	98.74	97.87	93.32	90.97	40.84	214430773	99.7878	209091238	97.3	0.014637	216.3	43.1	6.89621	0.985473	0.972454	0.000184734	3151758	2933171	96772	121815	2.19969	1.47399	154	67	44	9353	3132200	4888	31	115	43
00115051154M20BFF2	A	SouthChina	Guangdong	Han	Cantonese	Female	218257366	21806.6	95.7	96.71	87.99	88.38	41.08	217752990	99.7689	214358732	98.2	0.0252414	198.5	37.6	6.91499	0.98613	0.97863	0.000411807	3136455	2922089	95309	119057	2.20256	1.45043	152	71	41	9176	3116966	7605	31	119	46
00115051212M20BFF2	A	SouthChina	Guangdong	Han	Cantonese	Female	206967874	20689.4	98.15	97.05	92.12	89.24	40.67	206796334	99.9171	199975100	96.6	0.0226495	215.2	39.7	6.65032	0.986359	1.00096	5.28898e-09	3163114	2944070	96903	122141	2.19956	1.46515	141	77	46	9294	3143459	4604	34	99	51
00115051234F00BFF2	A	SouthChina	Guangdong	Han	Cantonese	Male	212162056	21206.6	97	95.56	91.1	86	41.22	211771197	99.8158	206634504	97.4	0.0106976	212	40.6	6.80116	0.991601	0.513127	0.000429826	3141524	2922990	96698	121836	2.20015	1.50429	161	75	44	9360	3121864	4946	34	104	45
00115051234M18BFF2	A	SouthChina	Guangdong	Han	Cantonese	Female	209719714	20957	98.29	96.76	91.89	88.33	41	209356715	99.8269	204899982	97.7	0.0175236	234.5	48.4	6.73006	0.986348	0.984849	0.00171883	3176871	2954738	98040	124093	2.19485	1.50035	161	84	46	9368	3157156	5154	32	108	46
00115051306M16BFF2	A	SouthChina	Guangdong	Han	Min	Female	229535062	22945.8	94.88	96.08	86.99	87.18	41.08	229075800	99.7999	225215224	98.1	0.0287936	213.2	39.5	7.19915	0.987274	0.991381	0.000558051	3148879	2931161	96405	121313	2.19749	1.45638	155	67	39	9204	3129497	5262	37	107	48
00115051319M25BFF2	A	SouthChina	Guangdong	Han	Cantonese	Female	211153688	21097	98.16	97.2	91.49	89.6	40.82	210707269	99.7886	207434836	98.2	0.0412082	201.5	37.9	6.77212	0.985096	0.993628	0.000580081	3131510	2915859	95462	120189	2.20295	1.46399	153	79	42	9217	3111987	5624	39	116	48
00115051322M16BFF2	A	CentralChina	Henan	Han	Mandarin	Female	209934534	20983.5	95.05	96.07	87.46	87.22	40.95	209708904	99.8925	205858040	98.1	0.0280117	205.3	38.4	6.5868	0.985708	0.985687	0.00150367	3144362	2927719	96089	120554	2.19952	1.48288	140	84	35	9206	3124907	7671	32	98	50
00115051348M16BFF2	A	SouthChina	Guangxi	Han	Cantonese	Female	207861480	20777.3	94.87	95.88	86.93	86.65	41.14	207626152	99.8868	204119102	98.2	0.0286136	217.8	41.6	6.52531	0.98599	0.965467	9.46068e-05	3160262	2942160	96611	121491	2.20412	1.47956	144	79	43	9363	3140491	5457	37	106	48
00115051355M16BFF2	A	SouthChina	Guangdong	Han	Mandarin	Female	203278156	20318.5	94.92	95.97	87.03	86.86	41.34	203109704	99.9171	199248296	98	0.0263311	213.1	40.3	6.38278	0.98546	0.975744	1.60145e-08	3151647	2935602	95854	120191	2.20236	1.46871	156	84	42	9432	3131775	6458	37	115	49
00115051357M16BFF2	A	SouthChina	Guangdong	Han	Cantonese	Female	175113230	17504.7	98	95.68	91.04	86.15	41.12	174682295	99.7539	171790338	98.1	0.0276742	218.8	41.4	5.61579	0.98219	0.996539	0.00194235	3133297	2918075	95614	119608	2.19772	1.45348	165	92	44	9355	3113586	4059	40	106	46
00115051366M16BFF2	A	SouthChina	Guangdong	Han	Cantonese	Female	198863410	19876.8	97.97	95.61	90.92	85.9	41.17	198666050	99.9008	194866012	98	0.0276419	220.4	42.4	6.38608	0.984919	0.959463	0.000338476	3166884	2948516	96682	121686	2.2017	1.49253	160	65	47	9368	3147285	5874	35	117	40
00115051367M19BFF2	A	EastChina	Zhejiang	Han	Mandarin	Female	215275442	21507.5	98.33	97.19	92.08	89.63	41.22	213404139	99.1307	209837406	97.5	0.0279702	211.7	39.3	6.86085	0.985675	0.999906	6.24639e-05	3156040	2937903	96886	121251	2.20225	1.47697	163	81	36	9448	3136151	6595	40	99	47
00115051369M24BFF2	A	SouthChina	Guangdong	Han	Min	Female	191862934	19172.4	98.37	97.11	92.11	89.29	40.95	191541520	99.8325	188223434	98.1	0.0236755	219.4	42.8	6.15659	0.98418	0.975247	0.000128293	3139683	2925016	95173	119494	2.19938	1.45722	157	67	40	9329	3120048	5773	35	115	43
00115051371M17BFF2	A	Unknown	Unknown	Han	Cantonese	Female	193035514	19283.3	97.06	96.86	89.37	88.77	41	192547496	99.7472	189117652	98	0.0183675	193.6	36.8	6.18037	0.983272	0.987753	1.52814e-07	3128400	2914199	94991	119210	2.20006	1.44143	153	80	49	9281	3108828	5156	39	108	46
00115051375M25BFF2	A	SouthChina	Guangdong	Han	Cantonese	Female	201288312	20118.5	97.89	96.59	90.76	88.11	41	201037726	99.8755	197737060	98.2	0.0204359	221.4	41.8	6.4612	0.985517	0.983084	9.11761e-05	3151403	2934087	96136	121180	2.20244	1.45526	154	81	46	9362	3131885	5741	42	112	48
00115051404M27BFF2	A	SouthChina	Guangdong	Han	Cantonese	Female	184220556	18408.6	97.78	97.07	91.09	88.92	40.72	183736796	99.7374	180814772	98.2	0.0276822	210.4	40.2	5.90406	0.982446	0.984115	7.9094e-08	3144666	2929219	95686	119761	2.19946	1.4843	171	80	42	9319	3124993	5213	38	108	43
00115051411M23BFF2	A	SouthChina	Guangdong	Han	Mandarin	Female	183840164	18361	97.03	95.77	89.42	86.9	42.28	183099620	99.5972	179369854	97.6	0.0201665	187.5	39.2	5.86406	0.979543	0.970366	0.00280675	3114242	2901933	94592	117717	2.20054	1.44748	156	80	35	9290	3094811	7252	37	101	42
00115051415M17BFF2	A	SouthChina	Guangdong	Han	Min	Female	201557382	20138.7	98.12	96.34	91.49	87.76	40.83	201154776	99.8003	197563938	98	0.0301007	208.2	39.3	6.46405	0.984597	0.98728	0.00104146	3145008	2928792	95804	120412	2.2	1.45199	142	71	37	9271	3125536	5274	40	113	50
00115051416M24BFF2	A	SouthChina	Guangdong	Han	Min	Female	233717990	23358.7	98.41	97.18	92.26	89.47	40.74	233019138	99.701	229509080	98.2	0.0253474	215.6	41.3	7.49285	0.987098	1.00072	0.000134553	3161603	2942061	97112	122430	2.19591	1.4989	150	84	44	9415	3141787	5563	32	117	45
00115051418M24BFF2	A	SouthChina	Guangxi	Han	Cantonese	Female	234326188	23418.6	98.5	97.54	92.69	90.59	41.22	233854689	99.7988	229840414	98.1	0.0260814	202.9	38.1	7.51791	0.986954	0.976862	9.20891e-05	3143626	2926510	96069	121047	2.19956	1.46977	150	75	39	9336	3123976	6725	44	114	47
00115051422M19BFF2	A	SouthChina	Guangdong	Han	Mandarin	Female	216593536	21643.2	98.03	95.95	91.14	86.75	40.89	216348670	99.8869	212524074	98.1	0.03105	214.8	40.8	6.95022	0.98655	0.972431	0.000917522	3166231	2946735	97239	122257	2.20168	1.48562	165	70	42	9321	3146461	5498	42	103	47
00115051428M22BFF2	A	SouthChina	Guangdong	Han	Cantonese	Female	197181236	19707	97.64	96.97	90.67	88.86	41.05	196914848	99.8649	193361070	98.1	0.0194874	201.9	38	6.33039	0.984655	0.987214	0.00304918	3137631	2921238	95933	120460	2.20139	1.4671	147	74	45	9141	3118173	5711	37	101	41
00115051430M24BFF2	A	CentralChina	Hunan	Han	Hakka	Female	212408852	21230.1	98.33	96.93	91.91	88.77	41.09	212154344	99.8802	208748144	98.3	0.0250988	224.3	43.2	6.81943	0.986249	0.992313	3.27177e-08	3171848	2953042	96935	121871	2.19919	1.48723	162	78	39	9395	3152028	7004	35	121	46
00115051440M24BFF2	A	CentralChina	Henan	Han	Mandarin	Female	199938880	19976	98.38	96.97	92.15	88.92	41.14	199703083	99.8821	196273664	98.2	0.0248115	215.8	43.2	6.41456	0.985057	0.982087	0.00132097	3158986	2941745	96538	120703	2.20114	1.50467	146	75	37	9369	3139229	10020	36	102	45
00115051444M18BFF2	A	SouthChina	Guangdong	Han	Mandarin	Female	188727416	18861.7	97.91	95.74	90.74	86.24	41.01	188409028	99.8313	184690520	97.9	0.028289	219.7	43	6.05633	0.984262	0.978537	0.000752668	3137315	2921210	96016	120089	2.19803	1.47348	154	89	38	9205	3118057	5765	32	107	50
00115051450M20BFF2	A	CentralChina	Hubei	Han	Mandarin	Female	208695472	20863.4	98.34	95.05	91.54	84.04	40.7	208004990	99.6691	204985260	98.2	0.0157584	256	48.5	6.69139	0.986308	1.00341	2.54225e-07	3159969	2941035	97140	121794	2.19827	1.4662	167	72	45	9386	3140284	7233	37	116	47
00115051454M16BFF2	A	CentralChina	Hunan	Han	Unknown	Female	207125098	20693.1	96.81	96.05	89.19	87.33	41.36	206570638	99.7323	202732600	97.9	0.0238619	192.7	40.4	6.62527	0.984457	0.979389	0.00131926	3129621	2914977	94925	119719	2.20268	1.44829	159	77	45	9344	3109907	6573	38	112	44
00115051455M21BFF2	A	SouthChina	Guangdong	Han	Cantonese	Female	212157192	21195.4	98.31	96.9	91.98	88.78	41.05	210064847	99.0138	206959752	97.6	0.0247815	214.9	40.7	6.75402	0.985304	0.99145	0.000993468	3160828	2942523	97019	121286	2.19932	1.46719	150	78	45	9337	3141230	4272	40	112	47
00115061008M20BFF2	A	SouthChina	Guangdong	Han	Cantonese	Female	244730454	24462.7	98.21	96.87	92	88.84	41.3	244429771	99.8771	238763340	97.6	0.0103208	207	38.6	7.86267	0.987337	0.989403	6.09975e-08	3165969	2945685	97312	122972	2.19742	1.44357	167	81	46	9407	3146142	5193	33	97	51
00115061017M17BFF2	A	SouthChina	Guangdong	Han	Cantonese	Female	238894772	23864.7	98.23	96.8	92.04	89.15	41.12	238634037	99.8909	233289308	97.7	0.0359058	189.5	36.2	7.66377	0.987008	0.973539	9.82314e-08	3161172	2941788	97011	122373	2.20153	1.44986	165	79	45	9498	3141283	6277	38	107	48
00115061025M20BFF2	A	SouthChina	Guangdong	Han	Cantonese	Female	210892714	21062.3	97.07	95.7	89.53	86.68	41.64	209633028	99.4027	205836800	97.6	0.0206733	187.5	37	6.72574	0.984599	0.986175	0.000297365	3137045	2921950	95328	119767	2.19902	1.43503	155	83	48	9277	3117469	5866	37	118	56
00115061026M25BFF2	A	SouthChina	Guangdong	Han	Cantonese	Female	204025720	20394.5	97.56	95.08	90.15	85.08	41.21	203819729	99.899	197875036	97	0.0189097	222.6	42.3	6.5537	0.985231	0.988299	9.45002e-06	3125191	2909504	95781	119906	2.20057	1.45004	145	81	45	9303	3105713	5591	36	102	48
00115061027M19BFF2	A	SouthChina	Guangdong	Han	Cantonese	Female	224049978	22380.3	97.05	96.16	89.85	87.64	40.97	223280839	99.6567	218998622	97.7	0.0224287	181.4	36.6	7.16135	0.985514	0.984765	0.000922115	3146228	2929402	95900	120926	2.19673	1.46779	156	81	37	9172	3126830	6042	39	113	46
00115061036M18BFF2	A	SouthChina	Guangdong	Han	Cantonese	Female	222621200	22239.4	97.81	97.24	90.9	89.21	40.89	222390428	99.8963	218540414	98.2	0.0231392	204	39.1	7.1458	0.986345	0.981774	0.000114327	3174173	2954207	97309	122657	2.20033	1.48097	150	83	40	9376	3154493	6251	40	108	43
00115061047M22BFF2	A	SouthChina	Guangdong	Han	Cantonese	Female	193919640	19374.7	98.05	97.06	91.47	89.52	41	193643643	99.8577	190050950	98	0.0266395	204.7	40.1	6.21921	0.983793	0.979354	0.000667887	3130254	2915427	95438	119389	2.20263	1.4605	148	71	40	9230	3110795	6017	43	105	38
00115061050M24BFF2	A	NortheastChina	Liaoning	Han	Mandarin	Female	199502492	19932.7	97.69	96.73	90.41	88.23	41.03	199278466	99.8877	195369694	97.9	0.0278542	204.3	40.5	6.40073	0.984541	0.972517	0.000178454	3148250	2931586	96302	120362	2.20093	1.49025	159	87	44	9292	3128670	8754	43	115	43
00115061060M16BFF2	A	SouthwestChina	Sichuan	Han	Mandarin	Female	206018952	20594.6	98.22	96.88	92.08	88.94	41	205822637	99.9047	200620730	97.4	0.00987786	202.3	37.8	6.62122	0.985184	0.998453	3.47604e-07	3150938	2932762	96664	121512	2.20238	1.46917	152	84	40	9374	3131251	6405	39	113	48
00115061063M20BFF2	A	SouthChina	Guangdong	Han	Cantonese	Female	243581032	24348.9	98.59	96.83	92.85	88.83	40.81	242535958	99.571	236538908	97.1	0.0225767	208.6	38	7.79926	0.98772	1.0029	0.000866208	3172028	2951288	97756	122984	2.19601	1.46635	157	68	48	9348	3152248	5368	39	112	44
00115061066M19BFF2	A	SouthChina	Guangdong	Han	Cantonese	Female	225069166	22481.1	98.41	97.51	92.4	90.43	40.86	224828273	99.893	220270572	97.9	0.0342898	201.6	38.9	7.22079	0.985935	0.981947	0.000561041	3146701	2928783	96288	121630	2.20119	1.43669	170	66	42	9310	3127125	6391	31	109	47
00115061080M17BFF2	A	SouthChina	Guangdong	She	Hakka	Female	167315144	16721.6	96.67	95.63	87.96	85.29	40.81	166835950	99.7136	164554358	98.3	0.0143864	226.9	43.8	5.35937	0.98074	0.995482	0.00273015	3112929	2900649	94397	117883	2.19814	1.46404	147	78	39	9127	3093542	4017	34	105	55
00115061092M12BFF2	A	SouthChina	Guangdong	Han	Cantonese	Female	206912220	20682.1	98.27	96.9	92.08	88.99	41.28	206696138	99.8956	199763852	96.5	0.00737397	201.1	38.7	6.64843	0.985008	0.988479	0.000833049	3151048	2934182	96190	120676	2.19986	1.46648	155	71	43	9218	3131611	5793	34	99	43
00115061096M16BFF2	A	SouthChina	Guangdong	Han	Cantonese	Female	231000964	23079.7	97.89	97.52	91.22	90.08	40.82	230458991	99.7654	226661106	98.1	0.0261044	198.9	37.5	7.40785	0.986599	1.00208	0.000432771	3145854	2928196	96396	121262	2.19903	1.44546	162	83	42	9294	3126378	5531	36	109	50
00115061099M24BFF2	A	SouthChina	Guangdong	Han	Cantonese	Female	214876396	21470.3	98.12	97.09	91.4	88.97	40.71	213926277	99.5578	210456398	97.9	0.0298637	206.1	39.3	6.87457	0.985792	0.991204	0.000509027	3146935	2930705	95853	120377	2.1978	1.45676	152	79	42	9207	3127481	5663	39	110	43
00115061101M18BFF2	A	SouthChina	Guangdong	Han	Cantonese	Female	192264696	19207.9	95.7	96.45	87.94	87.69	41.19	191741781	99.728	188858748	98.2	0.0243304	206.2	40	6.08865	0.98369	0.98822	0.000672676	3134497	2919374	95664	119459	2.19974	1.46886	158	82	40	9062	3115266	4875	38	110	48
00115061109F00BFF2	A	SouthChina	Guangdong	Han	Cantonese	Male	187687402	18759.6	98.09	97.05	91.89	88.82	41.62	187490104	99.8949	177722250	94.7	0.0219297	216.9	43.3	6.02156	0.986667	0.488038	0.00174099	3117726	2901658	95896	120172	2.20242	1.47523	145	78	46	9193	3098345	8178	37	101	50
00115061109M19BFF2	A	SouthChina	Guangdong	Han	Cantonese	Female	208391960	20824.1	97.83	97.24	91.07	89.51	40.88	208003487	99.8136	204297794	98	0.019914	201.2	37.6	6.68652	0.985364	0.993122	0.000284009	3156769	2937978	96831	121960	2.19944	1.45166	169	81	47	9339	3137083	5412	42	112	48
00115061110M20BFF2	A	SouthChina	Guangdong	Han	Cantonese	Female	232955016	23274.4	97.78	97.18	90.93	89.33	41	232709035	99.8944	228313322	98	0.0205955	202.6	37.8	7.47673	0.986773	0.987579	0.000411265	3166105	2946395	97306	122404	2.19786	1.48335	150	84	39	9405	3146366	6912	35	122	46
00115061112M17BFF2	A	CentralChina	Hubei	Han	Mandarin	Female	241805784	24161.5	97.89	97.5	91.21	90.01	40.94	241600384	99.9151	237340062	98.2	0.0241625	196.2	36.4	7.76287	0.987258	0.982073	5.74302e-08	3156912	2937300	97306	122306	2.20071	1.4744	171	88	44	9454	3136986	9134	43	113	50
00115061117M22BFF2	A	CentralChina	Hunan	Han	Mandarin	Female	296952390	29686.7	97.55	96.33	90.5	87.33	41.68	296744828	99.9301	289977802	97.7	0.00914627	227.2	44	9.54246	0.988538	0.979743	9.56911e-05	3178046	2955591	98213	124242	2.2022	1.48467	162	82	48	9492	3157970	7053	40	101	48
00115061123M27BFF2	A	CentralChina	Hubei	Han	Mandarin	Female	183225924	18315.8	98.02	96.72	91.45	88.62	41.01	183022953	99.8892	177481578	96.9	0.0064432	202	38.1	5.88566	0.982187	1.00291	0.000341606	3119006	2905864	94556	118586	2.20211	1.42851	144	64	46	9167	3099652	6011	31	103	45
00115061124M18BFF2	A	SouthChina	Guangdong	Han	Cantonese	Female	171767428	17162.6	96.72	96.2	88.2	86.89	41.1	171545625	99.8709	168510874	98.1	0.0178127	210.4	40.7	5.50713	0.981164	0.987783	1.43765e-07	3126937	2912760	95312	118865	2.19992	1.44893	152	77	41	9228	3107467	5064	31	112	45
00115061126M18BFF2	A	SouthChina	Guangdong	Han	Cantonese	Female	186692232	18657.7	96.77	96.15	88.36	86.75	40.97	186324491	99.803	183307138	98.2	0.0174843	213.4	40.3	5.98383	0.983701	0.985473	0.000549783	3128500	2913750	95465	119285	2.20048	1.46438	146	78	40	9318	3108889	4820	31	120	48
00115061128M16BFF2	A	SouthChina	Guangdong	Han	Cantonese	Female	200258756	20010.4	97.8	97.18	90.84	89.12	40.89	199999295	99.8704	196360410	98.1	0.0223568	208.2	38.9	6.42684	0.984886	0.981788	0.000111035	3146044	2929189	95915	120940	2.20067	1.48682	165	76	43	9359	3126400	5082	33	103	48
00115061129M25BFF2	A	CentralChina	Hunan	Han	Cantonese	Female	228666674	22843.7	96.86	95.83	89.24	86.93	41.03	227866323	99.65	223573366	97.8	0.0209726	187.6	38.8	7.30355	0.986159	0.974863	4.22737e-07	3151607	2934472	96130	121005	2.20268	1.47578	155	80	49	9343	3131919	6661	38	111	46
00115061131M25BFF2	A	SouthChina	Guangdong	Han	Cantonese	Female	199865360	19969.8	98	96.81	90.92	88.11	40.85	199591701	99.8631	196119124	98.1	0.0271171	215.5	41.6	6.41306	0.984715	0.982811	0.000120106	3132750	2916591	96079	120080	2.20202	1.43816	149	73	49	9233	3113243	7832	38	109	44
00115061135M19BFF2	A	SouthChina	Guangdong	Han	Cantonese	Female	212990428	21269.6	96.83	96.03	89.15	87.22	41.17	212110477	99.5869	208585112	97.9	0.0241647	195.8	44.7	6.80126	0.984876	0.992857	0.000714824	3162667	2944892	96288	121487	2.2001	1.50036	167	95	43	9373	3142797	5333	33	115	48
00115061143M26BFF2	A	SouthChina	Guangdong	Han	Cantonese	Female	181993500	18186.5	97.8	97.42	91	89.76	40.62	181471126	99.713	178515892	98.1	0.0258053	204.3	38.9	5.83104	0.982134	0.993747	3.10092e-08	3116846	2904144	94878	117824	2.19993	1.45231	153	67	38	9201	3097621	6094	43	106	53
00115061144M16BFF2	A	SouthChina	Guangdong	Han	Hakka	Female	173051132	17298.7	97.91	95.77	91.46	86.67	40.95	172787094	99.8474	167674976	96.9	0.00539974	216.2	41.6	5.55415	0.980725	1.02868	0.00156143	3111701	2899956	94244	117501	2.20132	1.43623	148	72	45	9182	3092289	4527	41	114	44
00115061146M16BFF2	A	SouthChina	Guangdong	Han	Cantonese	Female	217574910	21743.5	97.8	97.17	90.85	89.07	40.92	217371246	99.9064	213036514	97.9	0.0239585	206.5	39.1	6.98773	0.985949	0.958786	0.000326768	3134000	2917238	95808	120954	2.19621	1.43874	166	82	43	9215	3114481	5697	37	108	51
00115061147M18BFF2	A	EastChina	Anhui	Han	Hui	Female	215036352	21489.2	97.67	97.04	90.4	88.61	40.75	214617436	99.8052	211102594	98.2	0.0208848	213.4	40.2	6.90125	0.986046	0.99744	0.00314902	3145803	2927855	96688	121260	2.19981	1.46989	139	79	54	9296	3126230	7611	43	105	44
00115061151F00BFF2	A	SouthChina	Guangdong	Han	Cantonese	Male	217639848	21748.4	98.16	97.34	92.19	89.68	41.16	217415845	99.8971	207758210	95.5	0.0259078	206.6	41.3	6.98275	0.991498	0.503847	6.39501e-08	3120573	2902923	96242	121408	2.19593	1.4852	152	79	46	9308	3101092	8251	41	106	47
00115061151M19BFF2	A	SouthChina	Guangdong	Han	Cantonese	Female	183914278	18379.9	97.66	97.1	90.37	88.86	40.94	183619625	99.8398	180372350	98.1	0.0207381	213.3	41.3	5.90321	0.982888	0.965299	0.000264365	3144571	2927951	95912	120708	2.20001	1.45179	170	80	40	9366	3124956	4721	35	116	48
00115061153M20BFF2	A	SouthChina	Guangdong	Han	Mandarin	Female	212214502	21201.8	95.61	96.37	87.73	87.5	41.27	211798601	99.804	208060788	98	0.0239779	206.3	40.9	6.7239	0.985722	0.981742	0.000260485	3157004	2939465	96410	121129	2.20173	1.45397	162	78	42	9415	3137200	6188	41	116	46
00115061161M24BFF2	A	SouthChina	Guangdong	Han	Cantonese	Female	172540816	17240.1	97.93	96.64	91.04	88.43	42.27	172004655	99.6893	168572012	97.7	0.0222078	212.4	41.5	5.52334	0.97844	0.962542	0.00114374	3135148	2921639	94818	118691	2.20339	1.46285	139	63	38	9217	3115671	5982	40	101	41
00115061162M24BFF2	A	SouthChina	Guangdong	Han	Hakka	Female	218919994	21878.7	97.86	97.24	91.42	89.5	40.92	218642505	99.8732	213934834	97.7	0.0307186	201.9	38.9	7.02461	0.985855	0.994624	1.50294e-08	3113024	2898834	95133	119057	2.20207	1.35877	160	76	42	9072	3093822	6788	40	109	52
00115061164F00BFF2	A	SouthChina	Guangdong	Han	Cantonese	Male	209245326	20912.5	97.83	96.38	90.34	87.09	42.2	208665106	99.7227	204050946	97.5	0.0383672	236.8	50.8	6.70954	0.985087	0.488081	1.97315e-07	3137723	2919279	97072	121372	2.20168	1.48886	153	75	48	9390	3117859	5599	34	119	46
00115061164M16BFF2	A	SouthChina	Guangdong	Han	Cantonese	Female	185373106	18522.9	96.72	96.45	88.25	87.55	40.87	185011260	99.8048	182060202	98.2	0.017847	204.8	39.8	5.94134	0.982573	0.978836	6.16776e-07	3144931	2927426	96299	121206	2.2	1.46488	165	70	45	9310	3125340	4576	38	110	48
00115061165M25BFF2	A	SouthChina	Guangdong	Han	Cantonese	Female	210192454	21002.5	97.78	97.1	91.1	89.01	40.95	209937804	99.8788	205758374	97.9	0.0286572	207.9	40	6.7401	0.98568	0.988874	0.000561175	3155536	2937764	96559	121213	2.19982	1.50159	166	80	52	9313	3135971	7606	37	104	47
00115061166M25BFF2	A	SouthChina	Guangdong	Han	Cantonese	Female	207673436	20742.1	98.11	97.03	91.8	89.65	41.75	207151746	99.7488	202902568	97.7	0.0250193	193.2	36	6.6543	0.985034	0.969967	2.81589e-05	3139331	2922581	96027	120723	2.19947	1.47747	151	86	44	9344	3119598	6517	34	107	49
00115061167M20BFF2	A	SouthChina	Hainan	Han	Mandarin	Female	218474552	21825.3	95.6	96.59	87.7	88.08	41.11	217951450	99.7606	214356416	98.1	0.0239301	202.2	39	6.91953	0.986366	0.981979	0.0011041	3156401	2938125	96606	121670	2.20118	1.46988	161	68	43	9245	3136827	5615	45	114	45
00115061183M24BFF2	A	NorthChina	Beijing	Han	Mandarin	Female	180297380	18022.5	97.1	94.72	89.22	84.45	41.13	180090234	99.8851	175021360	97.1	0.0184579	220.3	42.2	5.78845	0.981517	1.0177	7.08127e-09	3124909	2912003	94740	118166	2.19873	1.46395	152	70	39	9209	3105462	6438	37	110	45
00115061184M19BFF2	A	SouthwestChina	Sichuan	Han	Mandarin	Female	187895648	18773.9	96.94	96.42	88.94	87.54	41.11	187575128	99.8294	184220688	98	0.0171869	201.1	38.2	6.02314	0.983201	0.975443	1.17047e-07	3132587	2918159	95246	119182	2.2002	1.47616	151	80	37	9270	3113091	6231	38	111	44
00115061189M27BFF2	A	SouthChina	Guangdong	Han	Cantonese	Female	192481702	19233.5	97.53	96.38	90.21	87.86	40.82	192161150	99.8335	189074972	98.2	0.0237501	214.8	41.1	6.17275	0.984322	0.996696	1.34652e-08	3142990	2927623	95652	119715	2.20255	1.45839	154	69	45	9237	3123517	6035	33	108	44
00115061193F00BFF2	A	SouthChina	Guangdong	Han	Cantonese	Male	196758806	19661.3	98.38	98.37	94.51	94.02	40.91	196247750	99.7403	189931344	96.5	0.024714	231.4	49.4	6.30358	0.98998	0.50966	0.000175582	3119761	2902613	96028	121120	2.19714	1.4776	167	73	36	9131	3100406	6332	33	104	50
00115061193M19BFF2	A	SouthChina	Guangdong	Han	Cantonese	Female	213810794	21353.1	96.96	95.61	89.2	86.5	41.98	212582435	99.4255	208309400	97.4	0.0217122	189.2	39.4	6.81846	0.985095	0.977881	0.000288622	3162920	2944127	96621	122172	2.20302	1.49158	156	83	37	9334	3143255	5870	34	120	46
00115061198M19BFF2	A	NorthChina	Hebei	Han	Mandarin	Female	179068316	17898.7	97.65	95.57	90.46	86.28	41.01	178873980	99.8915	174242826	97.3	0.0204553	216.5	40.6	5.75161	0.981862	1.00375	0.00252829	3145902	2930314	95779	119809	2.19988	1.46479	152	76	41	9247	3126267	7694	34	103	46
00115061202M19BFF2	A	SouthChina	Guangdong	Han	Mandarin	Female	206766730	20666.3	97.65	96.8	90.43	88.16	40.59	206324248	99.786	203144774	98.2	0.0171789	213.5	40.8	6.63432	0.985509	1.002	0.000932526	3169629	2950744	97035	121850	2.20011	1.49381	160	76	46	9339	3149903	4468	41	126	44
00115061204M18BFF2	A	SouthChina	Guangdong	Han	Cantonese	Female	237935738	23774.9	97.86	97.44	91.19	90.05	41.05	237426347	99.7859	234131406	98.4	0.0213929	199.3	37.7	7.62801	0.98694	0.991987	1.25382e-08	3171285	2951202	97407	122676	2.20273	1.49827	170	84	37	9403	3151369	5557	40	111	50
00115061208M24BFF2	A	SouthwestChina	Chongqing	Han	Mandarin	Female	216117090	21603.8	98.72	97.83	93.28	90.81	40.73	215728892	99.8204	209839260	97.1	0.0153829	217.7	44.5	6.93863	0.985739	0.991644	0.00126944	3169028	2949596	97345	122087	2.19945	1.49575	161	73	48	9416	3149264	6248	37	104	49
00115061210M24BFF2	A	SouthChina	Guangdong	Han	Cantonese	Female	250440914	25016	97.09	95.67	89.56	86.59	41.24	249543253	99.6416	244931104	97.8	0.0208743	187.1	37.8	8.00407	0.987894	0.987265	0.00122149	3153011	2934500	96427	122084	2.2004	1.46588	165	78	45	9375	3133182	6354	38	97	44
00115061211F00BFF2	A	SouthChina	Guangdong	Han	Cantonese	Male	337119274	33687.3	98.41	96	92.08	86.55	41.87	336350493	99.772	328776034	97.5	0.0425224	225.1	48.2	10.8059	0.995305	0.509172	0.000177746	3153719	2931370	98173	124176	2.20344	1.48453	161	83	42	9448	3133813	6672	42	111	42
00115061218M19BFF2	A	CentralChina	Hunan	Han	Xiang	Female	209911126	20978.9	97.54	96.57	90	87.57	40.64	209629591	99.8659	205874680	98.1	0.0173364	220.8	42.7	6.73835	0.985778	0.993731	0.000495261	3158651	2940558	96672	121421	2.20102	1.48298	139	81	45	9425	3138897	6344	36	111	48
00115061220M25BFF2	A	SouthChina	Guangdong	Han	Hakka	Female	193986846	19368	96.9	95.67	89.41	86.73	41.91	192751012	99.3629	188702938	97.3	0.0190306	184.4	36.7	6.17312	0.982357	0.982561	0.000315195	3134713	2920046	95186	119481	2.20111	1.46762	152	80	40	9313	3114995	5487	47	103	48
00115061222F00BFF2	A	SouthChina	Guangdong	Han	Unknown	Male	187860160	18771.4	97.97	96.29	91.2	87.19	41.62	187351738	99.7294	179248522	95.4	0.00751682	219.3	44	6.01762	0.987576	0.495185	0.000758047	3101043	2887058	95133	118852	2.20145	1.46449	159	68	40	9360	3081300	8708	37	100	47
00115061222M19BFF2	A	SouthChina	Guangdong	Han	Cantonese	Female	185783556	18567.3	97.6	96.99	90.31	88.78	41.26	185489446	99.8417	182332570	98.1	0.0178232	212.3	40.2	5.96242	0.983242	0.996018	0.000567628	3154022	2936673	96368	120981	2.2019	1.47455	140	82	50	9363	3134287	4935	41	110	50
00115061223M17BFF2	A	SouthChina	Guangdong	Han	Cantonese	Female	221397368	22127.5	97.68	96.91	90	88.44	40.89	221148970	99.8878	217629826	98.3	0.0171773	212.2	39.3	7.10886	0.986783	1.00347	0.00323923	3168405	2950692	96425	121288	2.20058	1.50464	156	81	41	9441	3148603	8395	28	112	47
00115061225F00BFF2	A	SouthChina	Guangdong	Han	Mandarin	Male	183147346	18302.1	98.01	96.37	91.3	87.32	40.85	182790116	99.8049	175635802	95.9	0.00950185	217.8	45	5.86973	0.987455	0.501519	0.000500779	3110275	2895522	95302	119451	2.19879	1.47311	151	64	42	9212	3090897	7261	37	102	46
00115061225M18BFF2	A	SouthChina	Guangdong	Han	Mandarin	Female	216693822	21654.1	97.59	97.09	90.5	89.15	40.77	216419692	99.8735	212851958	98.2	0.0158305	211.9	40.1	6.95452	0.986657	0.988347	0.000395481	3169343	2948470	97637	123236	2.2036	1.47012	162	83	42	9469	3149601	5434	34	117	47
00115061226M24BFF2	A	SouthChina	Guangdong	Han	Cantonese	Female	211397056	21127.9	98	96.94	91.26	89.16	40.77	210973274	99.7995	207541966	98.2	0.022575	207.5	38.5	6.78146	0.985559	0.984395	0.00014294	3157542	2939499	96592	121451	2.19797	1.47954	155	78	38	9379	3137797	4424	41	108	41
00115061229M24BFF2	A	SouthChina	Guangdong	Han	Cantonese	Female	217068680	21691.6	97.64	96.63	90.23	87.85	41	216812479	99.882	213118238	98.2	0.0280054	209.4	39.6	6.96727	0.986346	0.962564	0.00100553	3148763	2931059	96170	121534	2.1989	1.45221	155	75	39	9205	3129471	5822	34	105	53
00115061230F00BFF2	A	NorthwestChina	Xinjiang	Han	Mandarin	Male	199390384	19928.1	98.4	96.16	92.09	86.99	42	199096005	99.8524	194111684	97.4	0.0442576	225.6	47.7	6.39854	0.987719	0.505301	0.00142251	3131872	2914016	96424	121432	2.20089	1.51109	153	78	41	9316	3112267	8341	35	115	42
00115061230M19BFF2	A	NorthChina	Neimenggu	Han	Mandarin	Female	208284790	20812.8	96.66	95.51	88.65	85.95	41.94	206614202	99.1979	203280970	97.6	0.0188304	203.4	43.4	6.62466	0.984838	0.970642	0.000803142	3159157	2939563	97311	122283	2.2009	1.47927	167	91	40	9306	3139555	7659	33	103	51
00115061233M24BFF2	A	SouthChina	Guangdong	Han	Cantonese	Female	217084906	21688.1	97.7	96.79	90.43	88.3	41.28	216842365	99.8883	213103228	98.2	0.0304269	206.4	39.5	6.96565	0.985872	0.972336	2.35282e-07	3145244	2927950	96362	120932	2.19977	1.47338	165	76	40	9295	3125660	6104	44	113	41
00115061240M18BFF2	A	SouthChina	Guangdong	Han	Cantonese	Female	217497350	21739.4	97.98	96.59	91.32	88.22	41.41	217246273	99.8846	209656260	96.4	0.00658644	203.6	38.7	6.98448	0.986257	0.985727	6.7118e-08	3143438	2926513	96082	120843	2.19971	1.48448	164	81	42	9374	3123652	6445	39	104	48
00115061251M26BFF2	A	SouthChina	Guangdong	Han	Cantonese	Female	204918444	20476.7	97.83	97.42	91.36	89.72	40.6	204341290	99.7183	200806648	98	0.0277712	202.1	38.1	6.56849	0.984593	0.994419	1.83205e-07	3149107	2931832	96185	121090	2.19988	1.44357	169	68	45	9045	3130066	4844	32	93	44
00115061252M25BFF2	A	SouthChina	Guangdong	Han	Cantonese	Female	197527740	19733.5	97.66	96.69	90.27	88.03	40.88	197271850	99.8705	193675138	98	0.0278418	210.3	41	6.3384	0.984524	0.971631	1.42892e-07	3153801	2936520	96338	120943	2.1994	1.48131	151	75	50	9269	3134225	6776	44	108	46
00115061263F00BFF4	A	SouthChina	Guangdong	Han	Unknown	Male	195774890	19569.2	98.39	96.17	92.07	86.95	42.17	195462491	99.8404	191262750	97.7	0.0420363	227.4	45.9	6.286	0.984931	0.505648	0.00159828	3100195	2887795	94612	117788	2.20362	1.46082	164	72	54	9404	3080380	5988	44	119	43
00115061269M18BFF2	A	SouthChina	Guangdong	Han	Cantonese	Female	226515312	22644.1	98.16	96.71	91.83	88.36	40.9	226306932	99.908	221112494	97.6	0.0084414	207	38.5	7.28185	0.986466	0.992249	3.11208e-09	3166523	2946558	97330	122635	2.19879	1.48786	156	86	47	9354	3146787	5410	37	100	44
00115061274M23BFF2	A	SouthChina	Guangdong	Han	Cantonese	Female	207709474	20756.2	97.74	96.83	90.49	88.38	40.71	207370831	99.837	203852168	98.1	0.0289355	205.6	38.9	6.66674	0.985289	0.982991	0.000201007	3151765	2934307	96448	121010	2.20148	1.45149	153	76	45	9360	3132145	6076	42	114	48
00115061286M22BFF2	A	SouthChina	Guangdong	Han	Cantonese	Female	186736318	18666.6	97.72	95.8	90.81	86.96	41.4	186523236	99.8859	181153592	97	0.0216686	205.8	37.5	5.99833	0.982118	0.996407	2.52497e-08	3126531	2912645	94870	119016	2.19799	1.44438	158	82	50	9227	3107059	4316	38	107	45
00115061289M17BFF2	A	SouthChina	Guangdong	Han	Cantonese	Female	203454330	20334.4	97.64	96.7	90.56	88.04	40.83	203132705	99.8419	199955614	98.3	0.0137542	221.2	42.4	6.52911	0.985316	0.988163	0.000480442	3164462	2945731	96878	121853	2.20293	1.48592	147	75	42	9430	3144757	4842	35	104	48
00115061292M16BFF2	A	CentralChina	Hunan	Han	Xiang	Female	200438668	20026.5	97.68	97.05	90.75	89.06	40.81	200196757	99.8793	196717458	98.1	0.0161626	214	41	6.43068	0.985115	0.978714	5.02948e-07	3143572	2926746	96070	120756	2.19988	1.44961	160	87	42	9158	3124190	6665	41	121	50
00115061294M19BFF2	A	SouthChina	Guangdong	Han	Cantonese	Female	222327110	22211	97.69	96.78	90.7	88.5	41	221790840	99.7588	217739852	97.9	0.0305758	202.5	40.1	7.12595	0.986475	0.976915	6.66286e-08	3171347	2951939	96967	122441	2.20133	1.47473	162	79	44	9368	3151588	5544	40	97	43
00115061303F00BFF2	A	SouthChina	Guangdong	Han	Cantonese	Male	201465724	20132.2	98.32	95.86	91.69	86.15	41.7	201094763	99.8159	197136112	97.9	0.0429617	230.7	51.8	6.46201	0.985676	0.507674	0.000170452	3116915	2901113	95638	120164	2.20062	1.49244	161	79	41	9235	3097503	5079	44	109	41
00115061303M23BFF2	A	SouthChina	Guangdong	Han	Cantonese	Female	215935786	21574.5	98.36	97.27	92.19	89.71	41.09	215747849	99.913	211121978	97.8	0.0264164	205.5	40.3	6.93088	0.985642	0.969363	7.92281e-05	3163276	2943145	97335	122796	2.20119	1.47275	167	87	40	9364	3143551	7141	40	109	43
00115061304F00BFF2	A	SouthChina	Guangdong	Han	Cantonese	Male	224248702	22409.9	98.53	96.37	92.49	87.61	41.11	223711549	99.7605	215657448	96.2	0.0197792	221.5	43.2	7.18585	0.992781	0.501356	2.40169e-09	3146911	2926675	97549	122687	2.19837	1.49088	144	82	42	9413	3127210	6699	37	107	51
00115061304M21BFF2	A	SouthChina	Guangdong	Han	Cantonese	Female	201064166	20097.1	97.45	96.51	89.99	87.53	40.86	200783307	99.8603	197379488	98.2	0.0183308	216.3	41.6	6.45651	0.985338	0.990686	1.25619e-07	3141308	2923352	96565	121391	2.19939	1.45673	145	79	48	9173	3121972	5349	38	103	41
00115061310F00BFF2	A	SouthChina	Guangdong	Han	Cantonese	Male	205994586	20585.7	98.14	96.92	91.87	88.94	41.14	205611177	99.8139	196456588	95.4	0.0128043	203.6	41.2	6.60147	0.99061	0.503026	8.45884e-08	3122506	2905403	96002	121101	2.20154	1.45695	174	69	46	9237	3103193	7204	36	105	51
00115061310M19BFF2	A	SouthChina	Guangdong	Han	Cantonese	Female	198609460	19848.1	97.8	97.27	91.22	89.73	41.16	198326061	99.8573	194794656	98.1	0.0148217	207	39	6.37335	0.984855	0.968414	1.9168e-07	3158412	2939091	96793	122528	2.20108	1.49029	168	82	39	9289	3138788	4428	35	113	40
00115061313M23BFF2	A	SouthChina	Guangdong	Han	Cantonese	Female	199319646	19917.5	97.99	96.91	91.18	89.05	40.98	199090121	99.8848	195558990	98.1	0.0247854	208.9	39.5	6.39392	0.984936	0.989694	0.000483146	3149061	2932788	95856	120417	2.19945	1.4734	159	71	36	9231	3129553	6258	41	98	49
00115061314M18BFF2	A	SouthChina	Guangdong	Han	Cantonese	Female	196818238	19665.5	97.47	96.73	90.07	88.11	41.08	196615892	99.8972	193019028	98.1	0.0190917	210.8	41.1	6.31554	0.984843	0.984737	0.00279818	3155054	2938680	96082	120292	2.19738	1.489	151	79	45	9227	3135509	6635	36	109	49
00115061316M24BFF2	A	SouthChina	Guangdong	Han	Cantonese	Female	195241748	19509.5	97.86	97.36	91.45	89.6	40.69	194970482	99.8611	191105772	97.9	0.0261967	200.7	37.6	6.26163	0.983883	0.979615	0.000516332	3150237	2933983	95913	120341	2.19984	1.48123	168	70	38	9310	3130609	6160	37	97	51
00115061320F00BFF2	A	SouthChina	Guangdong	Han	Cantonese	Male	206821328	20665.4	98.09	96.64	91.23	87.84	41.98	206526661	99.8575	200744966	97.1	0.0420074	231	51	6.63489	0.988262	0.503091	3.39773e-08	3141998	2923448	96872	121678	2.20313	1.51631	158	84	45	9456	3122203	8823	39	106	45
00115061320M18BFF2	A	SouthChina	Guangdong	Han	Cantonese	Female	213859134	21369.1	97.73	97.01	90.9	88.91	40.84	213599915	99.8788	210062272	98.2	0.0159069	214.4	40.9	6.85997	0.986214	0.984777	1.26086e-07	3160196	2939876	97275	123045	2.20113	1.48295	157	78	44	9329	3140614	5151	42	106	51
00115061322M24BFF2	A	SouthChina	Guangdong	Han	Cantonese	Female	191174800	19100.5	97.16	96.82	89.89	88.97	41.1	190975622	99.8958	187347528	98	0.0234022	204.1	39.1	6.13033	0.983459	0.966488	9.17448e-08	3139840	2924096	95662	120082	2.2017	1.47362	150	69	44	9282	3120324	6327	39	104	37
00115061324M25BFF2	A	SouthChina	Guangdong	Han	Cantonese	Female	204539224	20433.5	97.73	97.56	91.02	90.26	42.03	202906079	99.2015	197429652	96.5	0.00980109	190.4	40.7	6.51103	0.983874	0.965683	0.000665704	3150105	2933540	96185	120380	2.19975	1.47165	163	82	45	9475	3129727	4937	39	114	45
00115061326M21BFF2	A	NortheastChina	Liaoning	Manchu	Mandarin	Female	212673092	21259.7	97.6	95.24	90.27	85.42	41.08	212432928	99.8871	207575568	97.6	0.0193426	223.8	41.4	6.83253	0.985404	0.993187	1.71704e-08	3161722	2943543	96851	121328	2.19829	1.48267	153	78	42	9321	3142098	7905	38	106	49
00115061331M16BFF2	A	SouthChina	Guangdong	Han	Cantonese	Female	225088592	22495.5	97.74	97.17	91	89.39	40.85	224792633	99.8685	221025718	98.2	0.01572	210.2	39.7	7.22238	0.987057	0.989705	6.06114e-08	3151538	2932787	96632	122119	2.19857	1.47123	154	72	38	9256	3131982	5288	37	110	50
00115061336M24BFF2	A	SouthChina	Guangdong	Han	Cantonese	Female	234054174	23385.5	97.35	96.62	90.48	88.42	41	233735511	99.8639	229551402	98.1	0.0243437	206.2	39.3	7.50293	0.987055	0.987989	0.000568189	3149345	2931692	96425	121228	2.20061	1.45143	160	65	47	9372	3129655	6995	41	119	48
00115061347M26BFF2	A	SouthChina	Guangdong	Han	Cantonese	Female	209616754	20949.1	96.87	96.43	88.97	87.79	40.83	209386916	99.8904	205810404	98.2	0.0223514	215.1	41	6.72371	0.985746	0.991094	0.000879603	3139449	2923090	96089	120270	2.20037	1.4589	140	82	49	9380	3119744	6715	38	108	47
00115061353M18BFF2	A	SouthChina	Guangdong	Han	Hakka	Female	221804422	22172	97.72	95.64	90.77	86.51	41.24	221470638	99.8495	215565282	97.2	0.0207351	208.5	38.4	7.1222	0.985764	1.0112	0.000660023	3163311	2944826	96979	121506	2.19737	1.47191	148	71	39	9323	3143628	4921	35	103	43
00115061359M26BFF2	A	CentralChina	Hunan	Yao	Mandarin	Female	238875292	23858.2	97.64	97.53	90.74	90.06	40.92	238011056	99.6382	233079904	97.6	0.00990892	194.3	42	7.63362	0.987019	0.99166	2.75876e-07	3173415	2953057	97449	122909	2.20105	1.49093	164	75	41	9546	3152968	6861	31	101	44
00115061363M25BFF2	A	SouthChina	Guangdong	Han	Cantonese	Female	209107350	20892.9	97.32	96.55	90.3	88.17	40.67	208658888	99.7855	205708394	98.4	0.0225972	213.4	41.4	6.70023	0.985598	0.998996	0.00121407	3143789	2929269	95249	119271	2.20206	1.47862	150	76	43	9356	3124104	10117	42	95	44
00115061365M21BFF2	A	SouthChina	Guangdong	Han	Cantonese	Female	218587246	21836.8	98.15	97.11	91.84	89.7	41	218214904	99.8297	214949078	98.3	0.0242986	196.3	37	7.01146	0.985867	0.975574	0.000356778	3137194	2922132	95415	119647	2.20155	1.45354	154	64	49	9233	3117675	9265	40	97	52
00115061367M17BFF2	A	SouthChina	Guangdong	Han	Cantonese	Female	209733452	20959.9	95.66	96.47	87.85	87.69	41	209340468	99.8126	206175520	98.3	0.0239691	204.8	38.8	6.64758	0.98545	0.980066	0.000698071	3139741	2924192	95644	119905	2.19893	1.47045	170	71	43	9268	3120183	5185	43	111	49
00115061368M25BFF2	A	SouthChina	Guangdong	Han	Hakka	Female	220802338	22053.6	98.02	97.17	91.44	89.16	41.47	219884518	99.5843	215353662	97.5	0.00708371	191.8	40	7.06026	0.985701	1.00386	0.000680892	3155681	2937194	96537	121950	2.19988	1.47395	174	68	45	9455	3135500	5962	39	116	40
00115061371M16BFF2	A	CentralChina	Hunan	Han	Mandarin	Female	199221598	19904.1	95.54	96.16	87.4	86.83	40.97	198887741	99.8324	196072144	98.4	0.0256158	217.5	42	6.31936	0.984604	0.992653	0.00205212	3139024	2922181	96347	120496	2.20066	1.48112	150	66	32	9062	3119772	6127	34	108	41
00115061374M18BFF2	A	CentralChina	Hunan	Han	Xiang	Female	191706996	19146.7	96.92	96.01	89.47	87.36	41.11	190997018	99.6297	186487520	97.3	0.0222271	188.9	41.3	6.12261	0.982563	0.969012	1.71889e-07	3116070	2903492	94489	118089	2.20422	1.43947	141	68	45	9264	3096501	6005	34	113	43
00115061376M24BFF2	A	SouthChina	Guangdong	Han	Cantonese	Female	176087336	17603	97.94	91.73	90.25	77.23	40.86	175025804	99.3972	172659086	98.1	0.0112358	284.5	55.6	5.62765	0.983244	0.995872	0.00239674	3145485	2929474	96047	119964	2.20323	1.46366	149	79	45	9371	3125843	3921	38	97	45
00115061380M20BFF2	A	SouthChina	Guangdong	Han	Cantonese	Female	203846654	20368.5	97.54	97.21	90.57	89.51	41.59	203652546	99.9048	199835486	98	0.0221965	201.5	38.9	6.54128	0.984516	0.967753	6.76692e-07	3144363	2927759	96095	120509	2.19814	1.46159	153	63	40	9388	3124772	5780	35	129	46
00115061386F00BFF2	A	SouthChina	Guangdong	Han	Cantonese	Male	207693778	20760.9	98.01	96	90.75	86.08	41.37	206984020	99.6583	203346958	97.9	0.036302	231.9	49	6.64889	0.990145	0.506585	0.000844116	3112271	2896863	95459	119949	2.20292	1.47688	146	70	40	9162	3092967	4612	39	97	44
00115061386M24BFF2	A	SouthChina	Guangdong	Han	Cantonese	Female	206853508	20675.3	97.51	97	91.34	89.36	42.37	206487621	99.8231	200969356	97.2	0.00803538	229.4	45.5	6.62714	0.984614	0.930748	0.000457926	3161026	2941918	96932	122176	2.20143	1.46373	157	76	48	9432	3141022	6774	33	112	41
00115061390F00BFF2	A	CentralChina	Hubei	Han	Unknown	Male	184411174	18430.5	98.05	96.64	91.48	88.14	41.05	184026796	99.7916	177297650	96.1	0.0104714	212.7	42.1	5.91214	0.988171	0.505378	5.03123e-08	3103594	2889300	94944	119350	2.20117	1.4521	162	78	47	9290	3084210	6962	42	103	47
00115061390M24BFF2	A	SouthChina	Guangdong	Han	Hakka	Female	185589492	18544.2	97.78	97.24	91.14	89.2	40.56	185043195	99.7056	182100896	98.1	0.0251298	210.2	40.5	5.9441	0.983	0.992435	0.000394269	3131442	2914910	96041	120491	2.20148	1.47367	150	86	49	9258	3111928	5743	34	109	53
00115061395F00BFF2	A	SouthChina	Guangdong	Han	Cantonese	Male	201732800	20158.4	98.52	96.28	92	87.49	41	201291078	99.781	195654402	97	0.0183133	224.4	46	6.46861	0.989999	0.508138	7.90959e-05	3113925	2897721	95851	120353	2.19736	1.46464	143	77	50	9294	3094465	5598	37	110	45
00115061395M19BFF2	A	SouthChina	Guangdong	Han	Cantonese	Female	203023196	20284.1	97.39	96.76	89.88	88.19	41.3	202836603	99.9081	198770420	97.9	0.0215835	209.9	41.2	6.51252	0.985025	0.964729	0.000195482	3146299	2928345	96268	121686	2.19956	1.45734	142	72	43	9261	3126748	6440	41	109	43
00115061399F00BFF2	A	SouthChina	Guangdong	Han	Cantonese	Male	176668776	17654.9	98.32	96.07	91.68	86.65	41.83	176342187	99.8151	172343188	97.6	0.040854	230.7	48.6	5.66634	0.983194	0.505119	7.0524e-05	3120873	2905420	95460	119993	2.20054	1.47234	175	75	44	9138	3101537	5475	44	110	47
00115061399M21BFF2	A	SouthChina	Guangdong	Han	Cantonese	Female	178931794	17880.3	97.63	96.62	90.13	87.78	40.8	178696386	99.8684	175936868	98.3	0.0262763	213	40.9	5.74443	0.981891	0.966003	0.00348224	3159641	2940582	97201	121858	2.20182	1.4822	165	75	40	9272	3140094	5321	40	113	45
00115061407F00BFF2	A	SouthChina	Guangdong	Han	Cantonese	Male	199611542	19946.5	98.04	96.36	91.09	87.06	42.23	199105285	99.7464	196114896	98.2	0.0387797	237.3	53.4	6.40372	0.983121	0.49506	0.000191742	3131747	2914556	96375	120816	2.20096	1.49484	147	76	53	9284	3112109	4452	36	118	39
00115061407M18BFF2	A	SouthChina	Guangdong	Han	Cantonese	Female	178192596	17812.4	97.57	94.93	90.19	84.74	42.06	178023301	99.905	173431738	97.3	0.0193674	224.9	42.7	5.72248	0.981002	0.974048	3.73808e-08	3140398	2923874	95841	120683	2.20216	1.45255	141	83	41	9329	3120882	5237	41	94	48
00115061410F00BFF2	A	SouthChina	Guangdong	Han	Cantonese	Male	240064196	23995.4	97.9	96.48	91.38	88.25	40.83	239781487	99.8822	233868336	97.4	0.0161386	204.9	39.9	7.70521	0.993255	0.508676	1.30612e-06	3150893	2930940	97050	122903	2.19915	1.48062	156	79	43	9373	3131177	4914	36	96	46
00115061410M26BFF2	A	SouthChina	Guangdong	Han	Cantonese	Female	198399610	19822.6	97.13	96.7	89.72	88.55	41.06	198105602	99.8518	194555158	98.1	0.0216429	209.9	40.2	6.35766	0.985055	0.98598	0.000269007	3176626	2955894	97379	123353	2.19597	1.47912	159	83	43	9291	3157002	6205	30	113	49
00115061411M20BFF2	A	SouthChina	Guangdong	Han	Cantonese	Female	192502062	19236.6	98.07	96.97	91.19	88.59	40.72	192232789	99.8601	188826824	98.1	0.0304896	212.5	41	6.17802	0.983996	0.989642	0.00109383	3130947	2916334	95280	119333	2.19994	1.45878	147	75	45	9244	3111539	6288	35	107	48
00115061416M25BFF2	A	SouthChina	Guangdong	Han	Hakka	Female	240556010	24028.7	97.24	96.83	90.04	88.92	40.91	240147658	99.8302	235961452	98.1	0.0239934	202.7	38.8	7.70703	0.987185	0.990434	0.000754843	3182701	2961721	97610	123370	2.19821	1.4852	153	81	36	9271	3163279	7190	39	123	46
00115061418F00BFF2	A	SouthChina	Guangdong	Han	Cantonese	Male	210624184	21048.3	98.21	97.31	92.02	89.65	41.44	210241820	99.8185	205487462	97.6	0.0284875	221.6	45.2	6.75025	0.990104	0.508671	7.27904e-05	3128577	2910351	96496	121730	2.19898	1.47858	146	82	43	9307	3108924	5920	33	97	44
00115061418M19BFF2	A	SouthChina	Guangdong	Han	Cantonese	Female	227204980	22706.9	95.4	96.67	87.18	88.25	41.16	226797250	99.8205	223136692	98.2	0.0260601	202.8	37.7	7.20121	0.986422	0.975292	5.44697e-08	3167940	2947561	97367	123012	2.20206	1.47164	156	86	48	9356	3148236	6168	32	105	49
00115061423M17BFF2	A	CentralChina	Henan	Han	Mandarin	Female	210250546	20997.7	98.14	97.08	91.41	89.35	41.11	209716708	99.7461	206390670	98.2	0.0397992	202.8	39.9	6.73691	0.984681	0.991831	0.000213378	3146545	2928602	96617	121326	2.19907	1.47165	169	85	37	9192	3127092	8283	31	97	47
00115061428F00BFF2	A	SouthChina	Guangdong	Han	Unknown	Male	233370344	23326.9	98.17	97.03	91.81	88.79	41.19	233099364	99.8839	227442112	97.5	0.0262834	229.7	51.6	7.4889	0.992161	0.504966	1.51458e-07	3126536	2907898	96581	122057	2.20029	1.5054	168	90	52	9333	3106870	5612	43	107	39
00115061428M17BFF2	A	CentralChina	Henan	Han	Mandarin	Female	204945116	20480.9	97.58	96.49	90.26	87.68	41.3	204558265	99.8112	200789486	98	0.0268065	208.2	40	6.57261	0.985622	0.976727	0.000119781	3176920	2956381	97722	122817	2.19653	1.51156	155	78	40	9312	3157229	7844	41	101	50
00115061431M19BFF2	A	SouthChina	Guangdong	Han	Cantonese	Female	203317572	20312.2	97.57	96.75	90.3	88.43	40.97	202933279	99.811	199562746	98.2	0.0281256	205.1	39.3	6.5186	0.985377	0.988884	0.00052432	3147876	2930416	96567	120893	2.20085	1.46967	146	81	48	9395	3128086	5134	37	107	43
00115061432M18BFF2	A	SouthChina	Guangdong	Han	Cantonese	Female	168871600	16875.3	97.48	96.2	89.86	86.82	41.1	168563095	99.8173	165840262	98.2	0.0246468	222.1	43.5	5.41679	0.981097	0.983608	0.00384131	3128198	2913441	95501	119256	2.20053	1.45794	133	71	42	9108	3108983	4627	35	105	45
00115061433M18BFF2	A	CentralChina	Hunan	Han	Mandarin	Female	227355804	22712.5	97.69	96.88	90.7	88.77	41.45	227110835	99.8923	222855170	98	0.0307391	198.1	38.2	7.29525	0.986788	0.969931	0.00153998	3171491	2951977	97254	122260	2.20067	1.48674	146	83	47	9450	3151624	7499	37	104	44
00115061437M19BFF2	A	CentralChina	Hunan	Han	Mandarin	Female	205794742	20564.5	97.41	96.47	89.77	87.58	41.43	205448199	99.8316	201992148	98.2	0.0272314	214.1	41.6	6.5993	0.985588	0.972897	5.46554e-08	3137498	2921603	95784	120111	2.20195	1.46916	140	84	38	9276	3117960	7175	32	114	46
00115061441M19BFF2	A	SouthChina	Guangdong	Han	Cantonese	Female	187547970	18744.2	98.21	96.78	91.52	88.24	40.75	187285338	99.86	184210234	98.2	0.0261594	224.4	43.4	6.01994	0.983769	0.979884	0.0015507	3115564	2903647	94515	117402	2.20106	1.4187	141	68	49	9069	3096271	6673	39	108	47
00115061442M18BFF2	A	SouthChina	Guangdong	Han	Cantonese	Female	166775250	16663	98.39	98.25	94.26	93.87	40.78	165261592	99.0924	161715810	97	0.0169284	225.8	47.1	5.31213	0.980646	1.00746	0.000486821	3127484	2913182	95127	119175	2.19825	1.45044	157	70	43	9206	3108013	3812	41	107	46
00115061444M26BFF2	A	EastChina	Shandong	Han	Mandarin	Female	224870742	22466.9	97.69	96.65	90.79	88.7	41	224214255	99.7081	220094558	97.9	0.0293426	199.9	38.4	7.2026	0.986448	0.982591	2.36861e-08	3160328	2942610	96465	121253	2.20004	1.50179	159	78	41	9393	3140675	9138	40	119	49
00115061457M17BFF2	A	SouthChina	Guangdong	Han	Cantonese	Female	201901412	20180.5	97.94	96.31	91.06	87.43	41.53	201662615	99.8817	194613552	96.4	0.00634832	216.1	41.6	6.48362	0.984669	0.962814	0.000479466	3149323	2932777	96171	120375	2.20238	1.47921	171	78	46	9328	3129500	6581	41	104	52
00115069001M25BFF2	A	SouthChina	Guangdong	Han	Cantonese	Female	209584506	20947.1	97.3	96.53	90.25	88.12	40.94	209237078	99.8342	205660298	98.1	0.0224928	212.9	40.5	6.71771	0.985403	0.98891	0.000657171	3141012	2926239	95665	119108	2.19995	1.45146	163	73	52	9169	3121568	8491	35	106	46
00115069008M20BFF2	A	SouthChina	Guangdong	Han	Cantonese	Female	215144418	21498.8	97.57	96.72	90.32	88.32	41.05	214596794	99.7455	211080536	98.1	0.0295717	205.9	38.8	6.89942	0.985763	0.967939	0.000591632	3146664	2929259	96421	120984	2.20199	1.48101	167	74	51	9362	3127007	5002	41	104	50
00115069009M26BFF2	A	SouthChina	Guangdong	Han	Cantonese	Female	222166168	22210.9	98.53	97.77	92.79	90.53	40.67	221444605	99.6752	215666082	97.1	0.0135923	219.3	44.6	7.12226	0.986384	1.00088	2.27746e-07	3169399	2949025	97484	122890	2.20017	1.46831	151	70	45	9278	3149827	4865	42	112	42
00115069011M24BFF2	A	CentralChina	Hunan	Han	Xiang	Female	206648436	20647.7	97.46	95.98	89.89	86.78	41.87	205705550	99.5437	201868818	97.7	0.0220576	194	38.8	6.6076	0.984296	0.982197	0.000520932	3142637	2925549	96298	120790	2.20194	1.46719	173	73	49	9372	3122854	6593	44	106	48
00115071001M23BFF2	A	SouthChina	Guangdong	Han	Hakka	Female	204761480	20457.2	97.64	96.92	90.66	89.08	41.23	204139438	99.6962	200106882	97.7	0.0261599	202.6	37.4	6.55874	0.9848	0.997651	0.000459116	3159651	2941950	96645	121056	2.19836	1.46836	142	76	47	9270	3140038	6536	40	98	54
00115071003F00BFF2	A	SouthChina	Guangdong	Han	Unknown	Male	218471238	21833.5	98.11	96.92	91.56	88.45	41.26	218137371	99.8472	213817768	97.9	0.0286589	237.4	50.8	7.01061	0.989283	0.5028	0.000188119	3134931	2915512	97184	122235	2.19855	1.47946	152	77	42	9294	3115371	6353	38	109	49
00115071003M19BFF2	A	SouthChina	Guangdong	Han	Min	Female	218511024	21827.6	97.7	97.09	90.9	89.19	40.91	218215736	99.8649	214127240	98	0.0200396	194.5	36.7	7.00758	0.986161	0.973018	0.000315977	3179311	2957239	98206	123866	2.19865	1.48994	165	97	43	9463	3159298	5848	41	113	47
00115071004F00BFF2	A	SouthChina	Guangdong	Han	Cantonese	Male	203463108	20334.8	98.07	96.81	91.45	88.11	41.86	203055226	99.7995	198070882	97.3	0.0264202	235.9	49.5	6.52133	0.985226	0.502105	2.29684e-08	3360990	3129836	101715	129439	2.19675	2.10671	171	94	43	10068	3339724	8326	43	121	48
00115071004M18BFF2	A	SouthChina	Guangdong	Han	Cantonese	Female	217879290	21771.7	97.58	96.92	90.45	88.66	41	217638834	99.8896	213673370	98.1	0.0209094	207.6	40	6.99353	0.986153	0.963749	0.000560945	3261648	3035024	99675	126949	2.20188	1.69983	165	78	39	9795	3241037	5526	40	114	51
00115071011M23BFF2	A	EastChina	Jiangxi	Han	Hakka	Female	207583550	20728.3	96	95.84	89.72	87.04	41.41	206866027	99.6543	202543430	97.6	0.0192754	177.3	36.7	6.6251	0.983834	0.978466	7.06033e-08	3135898	2921094	95269	119535	2.19797	1.45675	174	81	43	9224	3116444	6382	34	103	42
00115071018F00BFF2	A	SouthChina	Guangdong	Han	Cantonese	Male	180053888	17982.3	98.45	96.22	92.31	87.22	42.12	179731619	99.821	175021892	97.2	0.0435078	222.3	51.3	5.77245	0.978146	0.500616	0.000219384	3093380	2880523	94662	118195	2.20349	1.44829	155	74	42	9148	3074052	7896	37	118	47
00115071022M25BFF2	A	SouthChina	Guangdong	Han	Cantonese	Female	210515978	21027	97.72	97.01	90.93	89.33	40.72	210161862	99.8318	206358362	98	0.0253723	195.5	37.5	6.75093	0.984891	0.985429	0.000751971	3135249	2919336	95487	120426	2.20265	1.43266	149	78	40	9322	3115709	6425	32	118	45
00115071023M16BFF2	A	SouthChina	Guangdong	Han	Mandarin	Female	227124280	22696.4	97.63	97.04	90.66	89.03	41.59	226743863	99.8325	222573342	98	0.0207841	198.2	37.4	7.28593	0.986085	0.977872	0.000671824	3146266	2929303	96011	120952	2.19962	1.45556	144	72	48	9291	3126699	5896	36	120	49
00115071026F00BFF2	A	SouthChina	Guangdong	Han	Mandarin	Male	216506226	21634.7	97.81	96.45	91.33	88.5	41	216254088	99.8835	208620530	96.4	0.0189457	205.6	40.1	6.94359	0.991821	0.504967	3.92043e-07	3126981	2908543	96609	121829	2.20075	1.49085	155	73	45	9293	3107431	7187	37	102	45
00115071026M21BFF2	A	NorthChina	Hebei	Han	Mandarin	Female	187357658	18723.3	98.06	96.84	91.13	88.21	40.63	186904676	99.7582	183831588	98.1	0.0276131	213	40.8	6.00866	0.983322	0.982588	0.00142427	3158031	2939449	96899	121683	2.19935	1.48698	156	90	40	9392	3138347	7849	37	112	46
00115071031M24BFF2	A	SouthChina	Guangdong	Han	Min	Female	223618410	22342.3	98	96.23	90.72	86.84	40.78	223192971	99.8097	219712206	98.3	0.0258644	224	43.4	7.1746	0.986527	0.991713	9.24429e-05	3159455	2940103	97181	122171	2.19905	1.47796	150	71	46	9185	3140169	5276	39	108	47
00115071045M18BFF2	A	SouthChina	Guangdong	Han	Cantonese	Female	211193838	21105.4	97.47	97.13	90.31	89.27	40.95	210671265	99.7526	206945844	98	0.0210923	204.5	38.8	6.76532	0.985441	0.97146	0.00225874	3156489	2938425	96400	121664	2.20027	1.4869	157	70	40	9291	3136860	5202	44	111	48
00115071050M20BFF2	A	CentralChina	Hunan	Han	Xiang	Female	183243610	18310.4	98.01	96.87	90.88	88.62	41.45	182825387	99.7718	180093420	98.3	0.0376047	216.7	41.5	5.87645	0.981684	0.991223	0.000880948	3136807	2922170	95220	119417	2.20367	1.4657	150	75	49	9290	3117214	6738	35	104	45
00115071051M24BFF2	A	CentralChina	Hunan	Han	Xiang	Female	211155888	21091.7	97.7	97.03	90.85	89.34	40.85	210843673	99.8521	207214060	98.1	0.0283168	201.1	38.1	6.77228	0.985506	0.985705	5.32999e-08	3145817	2929250	96109	120458	2.19934	1.45083	160	72	40	9300	3126241	8197	41	108	50
00115071053M16BFF2	A	SouthChina	Guangdong	Han	Cantonese	Female	189087114	18897.8	97.43	96.89	90.13	88.56	41.59	188859073	99.8794	185244928	98	0.0195206	212.3	40.5	6.06738	0.983693	0.978198	0.000454779	3147528	2932026	95793	119709	2.19917	1.48993	149	75	44	9255	3127849	5235	39	101	58
00115071065M17BFF2	A	CentralChina	Hunan	Han	Mandarin	Female	227987408	22787.5	98.27	97.02	91.81	88.95	41.33	227322209	99.7082	223689520	98.1	0.0280331	216	41.1	7.30802	0.986642	0.979064	0.000327447	3170189	2950536	96928	122725	2.19764	1.48323	164	76	40	9328	3150519	6556	40	116	44
00115071069M22BFF2	A	SouthwestChina	Guizhou	Han	Mandarin	Female	231602984	23142.7	98.25	97.14	91.93	89.4	40.69	230698161	99.6093	226932088	98	0.0281662	210.6	39.8	7.41897	0.986815	1.00059	0.00140464	3168735	2948846	97402	122487	2.19936	1.49604	161	73	43	9309	3149138	7511	44	116	51
00115071070M19BFF2	A	SouthChina	Guangdong	Han	Cantonese	Female	210057976	20990.3	97.44	96.94	90.14	88.64	41.14	209625525	99.7941	205961574	98	0.0205758	211.1	40.5	6.73579	0.985616	0.98067	0.00147922	3142335	2925940	96073	120322	2.20075	1.45921	160	72	42	9391	3122546	5391	37	110	38
00115071072F00BFF2	A	EastChina	Anhui	Han	Unknown	Male	212018866	21189.9	97.75	96.45	91.16	88.47	40.66	211745098	99.8709	203680884	96.1	0.0219568	202.6	40.1	6.79683	0.991551	0.509904	7.92515e-08	3116953	2900421	95860	120672	2.20058	1.4483	138	89	45	9120	3097622	8470	38	98	42
00115071072M19BFF2	A	SouthChina	Guangdong	Han	Cantonese	Female	197435908	19723.4	98.04	96.8	91.01	88.47	41.36	197197961	99.8795	193453420	98	0.0391383	212.8	41.2	6.32801	0.983904	0.968202	1.62378e-07	3148030	2931179	96353	120498	2.20067	1.46232	178	83	48	9424	3128285	6927	40	108	49
00115071075M21BFF2	A	SouthChina	Guangdong	Han	Min	Female	205517904	20536.4	98.12	97.1	91.37	88.94	40.83	205082575	99.7882	201807172	98.2	0.0301494	209.3	40.3	6.59097	0.985045	0.978257	0.000406384	3160137	2941758	96878	121501	2.20029	1.46828	167	66	47	9435	3140391	5007	35	108	51
00115071079M18BFF2	A	SouthChina	Guangdong	Han	Cantonese	Female	264942842	26486.8	97.41	96.28	90.1	87.21	41.56	264356166	99.7786	258453240	97.6	0.00717611	232.7	46.8	8.49861	0.988357	0.983113	4.03043e-08	3169287	2947700	98037	123550	2.19878	1.45089	162	81	38	9445	3149541	5137	35	118	43
00115071085M16BFF2	A	EastChina	Fujian	Han	Min	Female	192866618	19273.8	97.32	96.67	89.76	87.9	41.66	192611991	99.868	189165362	98.1	0.01984	219.2	42.3	6.18651	0.983731	0.964359	1.23961e-08	3147699	2930569	96393	120737	2.2013	1.45311	150	76	44	9387	3128026	5237	43	105	49
00115071098M24BFF2	A	SouthChina	Guangdong	Han	Cantonese	Female	210887546	21083.2	98.48	97.86	92.66	90.75	40.66	210210635	99.679	204992044	97.2	0.0125318	221.5	44.1	6.76038	0.985747	1.00751	0.000822642	3152258	2934370	96640	121248	2.19828	1.47345	147	75	41	9275	3132793	4676	41	102	44
00115071101M16BFF2	A	SouthChina	Guangdong	Han	Cantonese	Female	185189034	18501.7	97.53	96.99	90.51	88.92	41.7	184703484	99.7378	180993580	97.7	0.020125	200.5	38.3	5.93111	0.982345	0.981538	0.00211105	3120730	2906800	94806	119124	2.20321	1.42602	150	75	40	9185	3101382	5584	35	106	44
00115071129M20BFF2	A	SouthChina	Guangdong	Han	Cantonese	Female	216002388	21581.9	97.97	97.77	91.94	90.93	41.05	215640548	99.8325	211198996	97.8	0.0266459	188	34.5	6.92549	0.985443	0.976611	1.04304e-07	3157800	2939972	96332	121496	2.20284	1.49838	150	72	42	9282	3138274	6903	37	107	43
00115071130M17BFF2	A	SouthChina	Guangdong	Han	Mandarin	Female	216734078	21658.2	98.26	97.03	91.73	88.92	40.69	216300443	99.7999	212811126	98.2	0.0270283	217.1	41.5	6.95343	0.985981	1.00536	0.00170975	3165430	2946148	97199	122083	2.19515	1.47186	149	72	36	9271	3145924	5499	38	111	41
00115071143M25BFF2	A	SouthChina	Guangdong	Han	Cantonese	Female	204465602	20433.9	97.58	97.13	91.56	89.74	42.7	204132389	99.837	198507430	97.1	0.00877333	218.5	43.6	6.54964	0.984345	0.94273	0.00149734	3152870	2935987	96424	120459	2.20222	1.49576	156	80	42	9361	3133130	6788	42	118	44
00115071145M26BFF2	A	SouthChina	Guangdong	Han	Cantonese	Female	237577584	23741.4	97.69	97.83	92.26	91.79	43.84	236313971	99.4681	228085830	96	0.0116353	203.5	39	7.54144	0.981273	0.936794	0.00116989	3157947	2939920	97108	120919	2.20089	1.46871	154	78	49	9384	3138224	6579	46	114	44
00115071146M16BFF2	A	SouthChina	Guangdong	Han	Cantonese	Female	207815630	20774.7	97.55	94.94	90.13	84.73	41	207595357	99.894	202613876	97.5	0.0191292	223.5	41.6	6.6748	0.985075	1.00306	5.42131e-08	3146348	2929538	96187	120623	2.20212	1.4325	150	72	46	9151	3126848	6270	37	120	50
00115071148F00BFF2	A	SouthChina	Guangdong	Han	Cantonese	Male	211776318	21163.1	98.32	96.33	91.76	87.34	40.81	211443541	99.8429	205627740	97.1	0.0416762	220.5	47	6.79373	0.990738	0.512255	6.76279e-08	3123813	2906203	96129	121481	2.1986	1.47524	160	86	40	9225	3104289	6023	40	115	41
00115071148M23BFF2	A	SouthChina	Guangdong	Han	Cantonese	Female	219606786	21941.6	97.66	96.75	90.69	88.56	40.94	219337265	99.8773	215795134	98.3	0.024136	206.3	39.7	7.04788	0.986185	0.977918	0.000974577	3170993	2950251	97409	123333	2.20193	1.47638	175	75	48	9330	3151235	6521	38	113	47
00115071152M26BFF2	A	EastChina	Fujian	Han	Min	Female	208421914	20835.1	98.59	98	93.06	91.26	40.77	207901277	99.7502	202882992	97.3	0.0138296	213.5	41.2	6.68609	0.985513	0.990234	4.45452e-08	3172347	2953230	97173	121944	2.2028	1.47284	161	81	39	9341	3152625	5950	39	102	43
00115071155F00BFF2	A	SouthChina	Guangdong	Han	Mandarin	Male	218086716	21799	97.85	96.07	91.02	86.56	41.53	217712981	99.8286	212663614	97.5	0.0524503	232.8	53.4	6.99629	0.989953	0.501079	2.27727e-08	3134493	2917135	96275	121083	2.2027	1.48518	155	83	45	9378	3114824	4935	35	113	46
00115071157F00BFF2	A	NorthwestChina	Shaanxi	Han	Mandarin	Male	207579344	20745.9	98.31	95.82	92.22	86.68	41.23	207243403	99.8382	199176150	96	0.0120151	211.3	42.8	6.65471	0.991123	0.502877	6.05447e-07	3141539	2922938	96580	122021	2.19883	1.51246	151	71	43	9296	3121885	8940	43	106	48
00115071157M17BFF2	A	SouthChina	Guangdong	Han	Mandarin	Female	196677358	19659.6	98.4	95.53	91.91	85.48	40.96	195928600	99.6193	191872352	97.6	0.0172614	238.2	46.2	6.30203	0.9855	0.997412	0.000733714	3150635	2931922	96619	122094	2.1975	1.47298	157	77	46	9310	3130978	4586	38	123	44
00115071160F00BFF2	A	SouthChina	Guangdong	Han	Cantonese	Male	224516294	22439.5	97.85	96.11	91.08	86.62	41.7	224136071	99.8306	218661504	97.4	0.0502083	232.9	49.1	7.20078	0.990478	0.507842	0.000250859	3128256	2910694	96431	121131	2.20145	1.47931	174	81	46	9249	3108767	6786	40	109	42
00115071160M19BFF2	A	SouthChina	Guangdong	Han	Cantonese	Female	207116960	20696.1	98.36	97.08	92.05	89.14	41.06	206882483	99.8868	203821918	98.4	0.0258384	221.1	43.2	6.64735	0.985428	0.966522	9.33665e-08	3162577	2943295	96950	122332	2.20119	1.48245	181	75	46	9326	3142886	6068	39	107	49
00115071163M17BFF2	A	SouthwestChina	Sichuan	Han	Mandarin	Female	226050158	22577.2	97.59	96.44	90.28	87.94	40.81	224525904	99.3257	220280236	97.4	0.0240376	183.2	36.3	7.21077	0.985402	0.991138	0.0023409	3134358	2916837	96098	121423	2.20006	1.42424	161	76	44	9197	3114833	6758	34	109	47
00115071165M24BFF2	A	SouthChina	Guangdong	Han	Cantonese	Female	200473110	20033.7	98.21	96.01	91.45	86.29	40.77	200079208	99.8035	197227248	98.4	0.0233427	231	45.2	6.43351	0.985005	1.00014	0.000832961	3141010	2924054	96227	120729	2.20234	1.44015	159	76	38	9290	3121493	4173	39	112	46
00115071171M17BFF2	A	SouthChina	Guangdong	Han	Min	Female	242776670	24259.9	98.36	97.4	92.19	90.03	40.88	241986234	99.6744	238141478	98.1	0.0306871	205.1	39.4	7.78082	0.987051	0.984069	7.09423e-08	3176291	2955101	97785	123405	2.19932	1.44376	161	88	45	9512	3156416	4883	37	107	49
00115071172M24BFF2	A	SouthChina	Guangdong	Han	Mandarin	Female	213219534	21309.8	97.69	97.5	91.97	90.78	42.31	212903038	99.8516	207898968	97.5	0.00887532	213.8	41.4	6.83186	0.985734	0.954436	1.65014e-07	3129913	2916415	94965	118533	2.20254	1.4722	154	75	42	9277	3110405	9445	40	102	41
00115071194M18BFF2	A	SouthChina	Guangdong	Han	Cantonese	Female	189026972	18891.2	98.24	96.78	91.64	88.25	41.25	188802548	99.8813	185443052	98.1	0.0265709	222.7	43	6.06697	0.983553	0.986073	1.3123e-07	3151189	2934870	95974	120345	2.19811	1.48614	150	74	43	9304	3131502	5350	35	105	45
00115071220M18BFF2	A	EastChina	Fujian	Han	Min	Female	182982264	18289.1	98.06	96.04	91.24	86.96	41.28	182667561	99.828	177165128	96.8	0.0198237	216.4	40.2	5.87321	0.982486	0.994313	0.000341938	3145711	2929834	95959	119918	2.19752	1.45113	157	70	38	9343	3126087	4271	36	109	48
00115071224M19BFF2	A	SouthChina	Guangdong	Han	Hakka	Female	204548352	20431.8	98.44	97.28	92.44	89.92	41.77	204108774	99.7851	200050282	97.8	0.0268765	208.7	40.6	6.55884	0.984162	0.979103	6.7097e-05	3116049	2904000	94314	117735	2.20087	1.4334	167	83	39	9382	3096415	8906	34	109	54
00115071226F00BFF2	A	SouthChina	Guangdong	Han	Unknown	Male	204454716	20435.3	98.35	96.26	92.46	87.81	40.9	204091159	99.8222	198231146	97	0.0116363	199.9	38.7	6.55959	0.990418	0.514106	1.14214e-07	3125041	2908094	96015	120932	2.19859	1.4784	163	68	49	9232	3105607	5014	36	114	42
00115071226M13BFF2	A	SouthChina	Guangdong	Han	Min	Female	213549420	21346.5	98.08	96.74	91.81	88.28	40.58	213393680	99.9271	207921948	97.4	0.0227384	219.9	40.8	6.86167	0.986677	1.00124	1.11692e-07	3155798	2935867	97309	122622	2.19895	1.47597	155	81	42	9078	3136575	4676	29	115	43
00115071231F00BFF2	A	SouthChina	Guangdong	Han	Unknown	Male	214245344	21412.1	98.39	96.31	92.55	87.88	40.8	213863770	99.8219	208588104	97.4	0.0130225	204.5	39.6	6.8703	0.99108	0.518643	0.000291049	3135880	2916967	97035	121878	2.20027	1.49121	156	75	41	9475	3116006	5327	36	109	46
00115071231M17BFF2	A	CentralChina	Hubei	Han	Unknown	Female	197130610	19697.4	96.77	95.42	88.6	85.91	41.58	196492827	99.6765	193184666	98	0.0212219	199.2	41.2	6.30761	0.984446	0.976678	3.75559e-08	3149491	2931805	96570	121116	2.19718	1.5015	152	81	42	9328	3129759	6280	40	115	50
00115071232M26BFF2	A	SouthChina	Guangdong	Han	Mandarin	Female	207782692	20769.6	97.61	97.29	91.68	90.21	43.27	207345640	99.7897	201590410	97	0.00885011	213.8	40.8	6.65604	0.982757	0.924653	0.000434042	3142242	2926645	95874	119723	2.20297	1.50991	154	78	47	9274	3122564	9252	33	113	46
00115071262M26BFF2	A	SouthChina	Guangdong	Han	Hakka	Female	183323706	18321.6	97.51	96.92	91.33	89.23	43.73	183105196	99.8808	177652778	96.9	0.00932845	224.9	44.6	5.87175	0.971011	0.916418	9.88341e-08	3131909	2917969	95168	118772	2.20139	1.44542	166	78	46	9346	3112338	7525	36	107	38
00115071264M20BFF2	A	SouthChina	Guangdong	Han	Cantonese	Female	187413048	18735.1	97.1	94.85	89.27	84.79	40.96	187221346	99.8977	182730088	97.5	0.0183682	219.2	41.1	6.01896	0.982389	1.01688	2.59001e-07	3127258	2912688	95340	119230	2.20032	1.45829	158	79	47	9315	3107814	3742	35	114	46
00115071268F00BFF2	A	SouthChina	Guangdong	Han	Mandarin	Male	199109274	19899.5	97.88	96.12	91.15	86.68	42.22	198671185	99.78	193242834	97.1	0.0496195	232.8	49.8	6.38009	0.986332	0.500553	4.53903e-08	3127676	2911032	96025	120619	2.20122	1.48993	162	74	45	9354	3108066	6117	39	102	49
00115071268M16BFF2	A	NorthwestChina	Gansu	Han	Mandarin	Female	210074734	20993.4	98.09	97	91.2	89.06	40.84	209793609	99.8662	206121114	98.1	0.0395322	207.9	39.2	6.74334	0.985326	0.975699	2.84484e-08	3161519	2942238	96893	122388	2.19968	1.49637	153	76	46	9392	3141800	8911	46	105	43
00115071274M26BFF2	A	SouthChina	Hainan	Han	Min	Female	237681332	23755.3	97.77	97.72	92.3	91.46	41.59	236853771	99.6518	231460838	97.4	0.00860097	201.4	38	7.6029	0.98711	0.971445	0.00151213	3185495	2964203	97951	123341	2.19798	1.50649	154	75	41	9354	3165685	6318	41	113	45
00115071277M24BFF2	A	SouthChina	Guangdong	Han	Hakka	Female	211343402	21120	97.37	95.61	89.84	86.02	41.07	210794451	99.7403	206767524	97.8	0.0103843	202.3	42.8	6.76906	0.98482	1.00088	7.51367e-08	3150324	2933058	96057	121209	2.20138	1.44847	160	72	51	9254	3130466	5387	39	112	46
00115071283F00BFF2	A	EastChina	Zhejiang	Han	Unknown	Male	221983854	22187.1	97.88	96.02	91.14	86.37	41.62	221470163	99.7686	217093212	97.8	0.0483122	234.9	50.2	7.11414	0.99074	0.511664	1.48575e-07	3143830	2924871	97057	121902	2.20061	1.48197	141	74	44	9437	3123992	6569	42	110	46
00115071283M16BFF2	A	SouthChina	Guangdong	Han	Hakka	Female	199571918	19941.8	98.06	96.81	91.12	88.53	40.84	199346488	99.887	196003432	98.2	0.0360097	208.9	39.8	6.40472	0.984731	1.00071	0.000347691	3166366	2946584	97223	122559	2.19916	1.48566	169	83	44	9372	3146576	5665	40	119	43
00115071294F00BFF2	A	CentralChina	Hunan	Han	Unknown	Male	209306324	20915	97.79	95.83	90.81	85.91	42.05	208968732	99.8387	202345160	96.7	0.0526111	240.7	53.1	6.70901	0.98349	0.498204	1.20869e-08	3119402	2902469	96291	120642	2.20257	1.51774	156	76	40	9263	3099937	8435	37	99	45
00115071294M16BFF2	A	CentralChina	Hunan	Han	Xiang	Female	208569852	20830.3	97.06	95.86	89.5	87.12	41.22	207835270	99.6478	203538832	97.6	0.0210562	186	40.8	6.66606	0.984931	0.985838	0.000737943	3159389	2940482	96675	122232	2.2006	1.4767	156	78	42	9389	3139687	6425	34	105	50
00115071306M17BFF2	A	SouthChina	Guangdong	Han	Cantonese	Female	184193372	18407.8	98.08	96.23	91.21	86.81	41.24	183108115	99.4108	180233876	97.9	0.0238587	229.6	43.8	5.89028	0.98279	0.988249	0.00164032	3143206	2928661	95601	118944	2.20109	1.47982	153	75	44	9327	3123601	4357	39	118	51
00115071314M18BFF2	A	SouthChina	Guangdong	Han	Mandarin	Female	219201868	21912.2	98.75	97.87	93.34	90.94	40.86	218892944	99.8591	213038222	97.2	0.0134024	218.2	44.4	7.03981	0.986346	0.984906	2.54673e-08	3160204	2940513	97185	122506	2.19614	1.46768	156	85	50	9357	3140517	4738	42	111	53
00115071317M17BFF2	A	SouthChina	Guangdong	Han	Mandarin	Female	218605740	21842.3	96.79	95.55	89	86.2	41.3	217586970	99.534	213593734	97.7	0.0192444	193.1	39.6	6.97423	0.985646	0.979405	0.00158797	3163038	2944687	96574	121777	2.19831	1.48017	154	73	42	9358	3143308	6056	40	108	43
00115071318M21BFF2	A	SouthChina	Guangdong	Han	Cantonese	Female	211074404	21095.4	98.42	98.23	94.44	93.78	40.68	210414712	99.6875	206079550	97.6	0.0186754	221.8	48.5	6.76404	0.986273	0.996333	2.44062e-06	3140951	2924575	95959	120417	2.20041	1.46585	156	65	44	9431	3121214	4957	38	108	53
00115071334M23BFF2	A	SouthChina	Guangdong	Han	Min	Female	223669224	22351.5	98.57	97.76	93.39	91.38	41.04	223421319	99.8892	217753346	97.4	0.0112041	201	38.6	7.17973	0.986196	0.972474	1.88328e-07	3159119	2942035	96490	120594	2.20143	1.45575	158	76	37	9346	3139467	8973	37	109	49
00115071344M23BFF2	A	SouthChina	Guangdong	Han	Hakka	Female	213811466	21372	98.14	96.97	92.06	88.98	40.41	213640294	99.9199	207768182	97.2	0.0223574	219.7	41.5	6.86653	0.986638	1.025	5.76818e-08	3150032	2931756	96573	121703	2.20064	1.45818	152	78	45	9283	3130575	4432	41	105	46
00115071347M25BFF2	A	SouthChina	Guangdong	Han	Cantonese	Female	188683580	18853.3	97.84	97.74	92.29	91.18	43.39	187889287	99.579	180898160	95.9	0.00971588	210.6	41.5	6.00761	0.978267	0.936296	0.000516808	3135490	2919374	96165	119951	2.20385	1.45206	167	80	41	9437	3115789	7961	30	108	45
00115071349M23BFF2	A	SouthChina	Guangdong	Han	Cantonese	Female	196028256	19595.5	98.22	96.65	91.83	88.2	40.82	195804259	99.8857	191134582	97.5	0.00702503	205.8	38.2	6.29961	0.983564	0.994872	2.20482e-07	3144843	2928632	95949	120262	2.20084	1.46186	143	89	52	9334	3125168	4547	34	117	50
00115071350M17BFF2	A	SouthChina	Guangdong	Han	Cantonese	Female	196672086	19648.2	98	96.63	91.88	88.03	40.86	195350152	99.3278	191983868	97.6	0.0264293	213.1	40	6.27876	0.983734	0.992476	0.00238522	3141551	2925889	95638	120024	2.20068	1.45745	148	68	43	9223	3122174	5320	34	89	50
00115071359M19BFF2	A	SouthChina	Guangdong	Han	Cantonese	Female	188151586	18806.8	97.2	95.23	89.63	85.7	40.98	187952433	99.8942	182948024	97.2	0.0187406	210	38.7	6.04304	0.982686	0.998194	7.46957e-08	3131270	2916246	95438	119586	2.19891	1.46002	143	69	45	9307	3111645	4006	34	122	50
00115071361F00BFF2	A	EastChina	Jiangxi	Han	Unknown	Male	216445490	21636.2	98.03	95.68	91.37	86	40.41	216195683	99.8846	210660224	97.3	0.0139706	213	41.7	6.94806	0.992615	0.521575	1.28957e-08	3127222	2909954	96439	120829	2.19973	1.45737	152	68	47	9236	3107724	6284	41	98	44
00115071361M24BFF2	A	CentralChina	Hubei	Han	Mandarin	Female	194759792	19468.7	97.82	96.87	90.59	87.56	41.12	194598761	99.9173	192147824	98.7	0.0134226	230.8	45	6.2549	0.984925	0.961458	0.00076569	3169209	2950101	97108	122000	2.20086	1.47874	157	74	42	9346	3149433	7145	33	102	44
00115071368F00BFF2	A	SouthChina	Guangdong	Han	Cantonese	Male	216355658	21620	97.94	96.4	91.36	87.32	40.86	216044947	99.8564	210417150	97.3	0.0501904	225.8	47.2	6.93527	0.991526	0.514218	0.000702933	3153523	2933920	97230	122373	2.19702	1.48433	153	79	38	9366	3133826	6089	50	109	42
00115071368M16BFF2	A	SouthChina	Guangdong	Han	Cantonese	Female	212847136	21272.6	98.11	97.09	91.35	88.87	40.94	212451123	99.8139	209003054	98.2	0.0276979	207.6	39	6.82821	0.985343	0.989833	0.000394184	3164566	2944792	97185	122589	2.20319	1.48196	155	87	41	9385	3144873	5640	44	111	44
00115071376M27BFF2	A	SouthChina	Guangdong	Han	Hakka	Female	249737250	24966.3	97.96	96.04	91.67	87.44	41.62	249207208	99.7878	243789752	97.6	0.0127283	214.3	39.5	7.99853	0.987658	0.998089	0.00111498	3164091	2944750	97277	122064	2.20282	1.46729	161	79	41	9310	3144472	5990	38	103	46
00115071378M17BFF2	A	SouthChina	Guangdong	Han	Cantonese	Female	207378772	20701.3	96.9	95.89	89.38	87.13	41.3	206483306	99.5682	202229742	97.5	0.0196392	182.4	40.3	6.61175	0.983764	0.983506	0.00171221	3153589	2936173	96218	121198	2.20021	1.47693	164	79	43	9201	3134123	4523	33	105	46
00115071381F00BFF2	A	NortheastChina	Heilongjiang	Han	Unknown	Male	208172636	20806.9	98.33	96.03	92.39	87.19	40.81	207816373	99.8289	202288754	97.2	0.0120299	203.2	39.1	6.67675	0.990796	0.518272	1.4228e-07	3135525	2917483	96565	121477	2.19793	1.4885	140	75	39	9142	3116264	7438	37	115	43
00115071381M16BFF2	A	CentralChina	Henan	Han	Unknown	Female	194509876	19428.4	98.16	97.19	91.61	89.47	41.02	193811732	99.6411	189995830	97.7	0.0289878	199	37.5	6.22597	0.983753	0.996442	0.00131104	3173175	2953181	97233	122761	2.19784	1.50434	158	79	47	9400	3153352	8548	43	108	45
00115071390M16BFF2	A	SouthChina	Guangdong	Han	Mandarin	Female	236615708	23651.5	98.16	96.97	92.15	89.01	40.73	236446761	99.9286	229612928	97	0.0206118	214.4	40.1	7.60141	0.987633	1.01437	0.000968192	3169302	2949117	97247	122938	2.19957	1.49261	143	69	37	9350	3149665	5112	39	111	45
00115071399M26BFF2	A	SouthChina	Guangdong	Han	Hakka	Female	203081130	20296.4	97.53	97.5	91.69	90.66	42.68	202298129	99.6144	197473342	97.2	0.0103743	222.6	44.3	6.45942	0.984324	0.932287	9.87477e-08	3144926	2927406	96621	120899	2.20305	1.4917	149	88	42	9324	3125329	6588	37	98	31
00115071413M17BFF2	A	EastChina	Anhui	Han	Mandarin	Female	210942990	21075.4	97.88	97.41	91.48	89.72	40.92	210547784	99.8126	206557206	97.9	0.0274281	201	38.2	6.76399	0.98563	0.977292	2.04553e-07	3146833	2929714	96194	120925	2.20204	1.4676	155	86	55	9318	3127275	8279	32	119	47
00115071415M23BFF2	A	EastChina	Fujian	Han	Mandarin	Female	208107920	20802.6	97.62	97.51	91.75	90.54	43.29	206451552	99.2041	201527304	96.8	0.00963395	220.9	43.1	6.60195	0.98142	0.95038	0.00115215	3151958	2934655	96638	120665	2.20104	1.46113	151	72	44	9363	3132169	6370	36	101	47
00115071417M18BFF2	A	EastChina	Jiangxi	Han	Gan	Female	196889572	19673.5	97.83	97.38	91.35	89.64	40.99	196332544	99.7171	192633976	97.8	0.0254483	203.6	38.5	6.30741	0.983996	0.991149	0.00339137	3131025	2915517	95467	120041	2.20053	1.44692	153	81	50	9227	3111534	6732	36	109	44
00115071418F00BFF2	A	SouthChina	Guangdong	Han	Cantonese	Male	210959482	21075.4	98.17	96.82	91.6	88.36	42.52	210596332	99.8279	204162470	96.8	0.0413406	227.5	49.5	6.76342	0.984052	0.487371	0.000321648	3148837	2929091	97208	122538	2.20188	1.49996	171	77	42	9411	3129007	9488	44	113	47
00115071418M17BFF2	A	SouthChina	Guangdong	Han	Cantonese	Female	210784670	21058.5	97.94	97.43	91.68	90.06	41.12	210459855	99.8459	205850334	97.7	0.0309434	196.3	37.4	6.76135	0.984993	0.96752	4.65651e-08	3161211	2941359	97216	122636	2.19989	1.46883	155	83	42	9265	3141769	7024	38	104	49
00115071420M22BFF2	A	SouthChina	Guangdong	Han	Hakka	Female	210274168	21014.8	97.72	97.63	92.06	91.2	41.7	210007592	99.8732	204957686	97.5	0.00933835	205	38.9	6.73771	0.985873	0.970526	0.00138088	3160270	2942909	96317	121044	2.19895	1.47514	153	77	44	9384	3140571	6629	35	123	47
00115071423F00BFF2	A	SouthChina	Guangdong	Han	Cantonese	Male	199606370	19945.9	98.07	96.34	91.06	87.04	41.81	199306131	99.8496	195142760	97.8	0.0329125	223.1	46.2	6.4031	0.988893	0.503587	0.00149192	3125553	2908607	96086	120860	2.20022	1.44153	171	88	41	9303	3106060	5674	32	116	42
00115071423M17BFF2	A	SouthChina	Guangdong	Han	Cantonese	Female	202467144	20238.1	98.7	97.78	93.09	90.61	40.66	201784660	99.6629	197024114	97.3	0.0135784	219	45.3	6.4883	0.984935	1.00689	0.000511444	3166982	2946683	97377	122922	2.19878	1.49303	153	82	45	9214	3147552	5280	39	103	48
00115071425F00BFF2	A	EastChina	Shandong	Han	Mandarin	Male	204657744	20457.7	97.9	95.88	90.52	85.56	42.21	204265039	99.8081	200557262	98	0.0359852	253.9	56.4	6.56475	0.98731	0.489556	1.02494e-07	3117258	2900271	96227	120760	2.20321	1.47065	165	80	48	9397	3097557	7560	40	108	40
00115071425M18BFF2	A	EastChina	Jiangxi	Han	Mandarin	Female	172626496	17249.9	97.49	96.47	90.11	87.8	40.88	172429353	99.8858	169470494	98.2	0.0246551	216.1	42.4	5.53996	0.980986	0.974254	0.000497283	3163864	2944940	97018	121906	2.20051	1.47414	162	86	40	9335	3144136	7014	35	107	45
00115071426M18BFF2	A	SouthChina	Guangdong	Han	Mandarin	Female	201866370	20169	97.77	96.5	91.06	88.25	40.95	201383763	99.7609	198401438	98.3	0.0257689	206.7	39.8	6.47127	0.984895	0.975083	1.44666e-07	3143039	2929131	95068	118840	2.2	1.4788	146	72	37	9188	3123655	10609	36	112	45
00115081009M16BFF2	A	CentralChina	Hunan	Han	Xiang	Female	181816068	18173.9	97.15	94.92	89.41	84.88	40.94	181639918	99.9031	177246500	97.5	0.0205074	216	40.6	5.83759	0.981869	1.02453	0.00322897	3145730	2930363	95726	119641	2.20346	1.4713	153	77	44	9378	3126123	4644	31	106	50
00115081015M18BFF2	A	CentralChina	Hunan	Han	Hakka	Female	184891806	18473	97.97	96.37	91.07	87.69	41.25	184251179	99.6535	180911452	97.8	0.0370017	206	38.1	5.92182	0.982362	0.993932	2.45745e-07	3135233	2919959	95622	119652	2.20133	1.45161	155	72	46	9242	3115663	6671	38	113	48
00115081018F00BFF2	A	SouthChina	Guangdong	Han	Cantonese	Male	232447730	23229.8	97.94	96.48	91.37	87.62	40.72	232081742	99.8426	225979942	97.2	0.0541837	226.8	47.5	7.45546	0.992408	0.513124	0.000411054	3130627	2911677	96734	122216	2.19967	1.45853	148	79	41	9206	3111250	5562	37	99	41
00115081018M18BFF2	A	SouthChina	Guangdong	Han	Cantonese	Female	223752670	22355.2	97.66	96.92	90.72	89.05	41.02	223441699	99.861	219433784	98.1	0.0261433	200.5	38.5	7.17799	0.986225	0.969371	0.00105378	3180710	2959261	97746	123703	2.19925	1.49623	156	84	39	9390	3160804	6880	37	113	52
00115081021F00BFF2	A	SouthChina	Guangdong	Han	Unknown	Male	215192856	21505.5	98.2	97.03	91.76	88.97	43.66	214780757	99.8085	208013214	96.7	0.0428403	219.6	47.2	6.90158	0.958342	0.477657	7.1035e-08	3137917	2918769	97155	121993	2.20315	1.48075	177	89	47	9443	3117969	7556	38	106	44
00115081021M17BFF2	A	SouthChina	Guangdong	Han	Min	Female	188281192	18811	97.77	96.95	91.02	88.51	40.56	187912123	99.804	184803924	98.2	0.0268467	213	42.1	6.03812	0.983042	0.98723	4.44463e-08	3151195	2932286	96748	122161	2.19976	1.46714	158	76	42	9335	3131622	5457	36	109	44
00115081033F00BFF2	A	SouthChina	Guangdong	Han	Unknown	Male	229073342	22894.1	98.08	96.94	91.2	88.54	41.69	228793576	99.8779	221576766	96.7	0.0421965	226	46.5	7.35262	0.991555	0.496744	4.14657e-08	3139951	2920564	97092	122295	2.1958	1.47217	171	80	43	9225	3120302	6506	47	115	44
00115081033M19BFF2	A	SouthChina	Guangdong	Han	Cantonese	Female	229442960	22919.6	97.78	97.16	91.12	89.77	40.78	229124091	99.861	224630280	97.9	0.0268253	192.6	36.3	7.36002	0.98646	0.987152	0.00127111	3181100	2958396	98152	124552	2.20186	1.50709	149	77	47	9431	3161065	6942	32	107	47
00115081040M17BFF2	A	SouthChina	Guangdong	Han	Cantonese	Female	205497018	20535.6	97.84	97.2	91.36	89.37	41.23	204941231	99.7295	200679114	97.7	0.029943	204.6	39.6	6.58781	0.984316	0.964984	0.00020056	3159515	2941903	96331	121281	2.1988	1.50048	149	77	47	9293	3139982	5756	39	122	44
00115081045M17BFF2	A	SouthChina	Guangdong	Han	Hakka	Female	197367726	19715.5	96.86	95.67	89.3	86.64	41.91	196218409	99.4177	191990040	97.3	0.017566	183.9	40.2	6.28851	0.982439	0.971336	2.99527e-09	3118711	2907164	94131	117416	2.20341	1.41982	158	74	40	9256	3099082	7424	33	121	46
00115081055M26BFF2	A	SouthChina	Guangdong	Han	Min	Female	218191300	21812.7	97.77	95.22	90.88	85.36	41.73	217968417	99.8978	213400316	97.8	0.0121365	233.8	44.7	6.99445	0.986229	0.969898	0.000443547	3146508	2929803	96152	120553	2.20212	1.44609	152	71	42	9307	3126773	5024	38	115	49
00115081056M24BFF2	A	SouthChina	Guangdong	Han	Cantonese	Female	173220462	17309.5	97.45	97.07	91.37	89	45.91	172584216	99.6327	163143374	94.2	0.0108606	224.3	47	5.50381	0.940151	0.863824	2.25369e-08	3115851	2902715	95096	118040	2.20813	1.47913	151	80	43	9438	3096040	10219	36	104	47
00115081059F00BFF2	A	SouthChina	Guangdong	Han	Unknown	Male	224731512	22449.8	98.15	96.94	91.57	88.57	42.2	224410099	99.857	217420268	96.7	0.0460514	225.1	49.7	7.20825	0.989603	0.489495	0.000248486	3150657	2931375	97261	122021	2.19996	1.50202	166	92	47	9520	3130552	10377	33	104	46
00115081059M20BFF2	A	SouthChina	Guangdong	Han	Hakka	Female	188283186	18813.5	97.78	97.23	91.65	90.19	44.44	188019393	99.8599	181267612	96.3	0.0130267	217.9	44.1	6.03569	0.958455	0.921904	1.78766e-08	3081614	2868725	94644	118245	2.20131	1.36281	159	83	39	9163	3062253	10284	35	110	45
00115081065F00BFF2	A	SouthChina	Guangdong	Han	Cantonese	Male	186122902	18600.5	98.01	96.66	90.95	87.81	42.11	185862169	99.8599	180543228	97	0.0389327	234.7	51.1	5.97153	0.985372	0.498614	9.10092e-05	3107326	2891829	95545	119952	2.19903	1.48405	150	70	42	9410	3087728	6259	38	116	42
00115081065M18BFF2	A	SouthChina	Guangdong	Han	Cantonese	Female	193291780	19323.5	98.7	97.77	93.08	90.61	40.64	193026890	99.863	187816852	97.2	0.0135972	223.2	46.7	6.20678	0.983892	0.993385	0.000834674	3157572	2938276	97233	122063	2.19827	1.48429	162	81	39	9344	3137806	4178	38	99	49
00115081068M17BFF2	A	SouthChina	Guangdong	Han	Cantonese	Female	175301746	17503.8	97.8	96.84	91.07	89.13	40.97	174664700	99.6366	171185186	97.7	0.0190896	189.2	41.2	5.60558	0.979832	0.996099	0.000386465	3118654	2905202	94794	118658	2.19993	1.44003	152	72	39	9188	3099332	4441	32	106	48
00115081072M17BFF2	A	SouthChina	Guangxi	Han	Cantonese	Female	212603808	21240.1	97.48	96.38	90	87.77	41.45	211562048	99.51	207653456	97.7	0.0261446	185.2	37.3	6.78819	0.984074	0.993693	0.000241971	3151839	2934239	96363	121237	2.20068	1.45746	151	82	41	9286	3132200	4942	30	113	50
00115081073M21BFF2	A	SouthChina	Guangdong	Han	Cantonese	Female	211246382	21116.7	98.5	97.43	93.03	90.32	41.55	211054165	99.909	205568422	97.3	0.00935748	214.8	40.3	6.78741	0.986028	0.971811	6.96887e-08	3155592	2937649	96829	121114	2.20069	1.4641	173	78	43	9467	3135657	5798	40	107	42
00115081084M16BFF2	A	SouthChina	Guangdong	Han	Cantonese	Female	225020258	22480.2	97.57	96.17	90.2	87.22	41.36	224005358	99.549	220221300	97.9	0.0215641	188.7	36.9	7.19225	0.986303	0.995001	0.000693425	3148798	2930797	96354	121647	2.20017	1.46467	147	82	45	9333	3129251	5158	38	103	47
00115081094M18BFF2	A	SouthChina	Guangdong	Han	Cantonese	Female	196571314	19617.3	97.56	96.33	90.26	87.77	41.63	194788876	99.0932	190928862	97.1	0.0251413	183.6	42.1	6.23923	0.98236	0.992023	0.000701987	3125732	2910864	95095	119773	2.19919	1.41398	167	78	42	9239	3106349	5110	37	103	45
00115081109M24BFF2	A	SouthChina	Guangdong	Han	Cantonese	Female	211937728	21183.8	98.2	96.97	91.92	88.7	42.7	211142909	99.625	205740434	97.1	0.0136613	219.9	42.3	6.78814	0.984522	0.942254	0.000351874	3139328	2923189	95993	120146	2.20214	1.44892	157	76	44	9379	3119461	6507	44	110	48
00115081110M25BFF2	A	SouthChina	Guangdong	Han	Cantonese	Female	196392144	19634.7	98.54	97.85	92.81	90.71	40.78	195995766	99.7982	191243742	97.4	0.0130709	223.1	45.1	6.30327	0.984672	0.99038	0.00100167	3133516	2917426	95790	120300	2.2005	1.44647	150	85	35	9290	3113954	4583	36	104	44
00115081114M18BFF2	A	SouthChina	Guangdong	Han	Cantonese	Female	190391320	19025.2	97.96	96.25	91.01	87.33	40.78	190081848	99.8375	187037210	98.2	0.0329666	205.9	39	6.10834	0.983161	0.984452	0.000687344	3113052	2901534	94189	117329	2.19908	1.43557	153	67	39	9168	3093781	8585	37	102	37
00115081115F00BFF2	A	SouthChina	Guangdong	Han	Mandarin	Male	213258046	21314.8	98.03	96.43	90.93	87.49	41.93	212892311	99.8285	208702224	97.9	0.0506323	230.4	48.7	6.84305	0.98977	0.503311	3.24353e-08	3133368	2914971	96764	121633	2.20087	1.49022	178	87	45	9360	3113745	7284	41	110	49
00115081115M23BFF2	A	EastChina	Jiangsu	Han	Mandarin	Female	210264006	21016.7	97.62	97.44	91.77	90.43	42	209469313	99.622	205007856	97.5	0.00897766	224.6	45.1	6.69644	0.986213	0.941523	0.000152159	3176896	2955749	97811	123336	2.1994	1.4942	155	86	42	9410	3157087	7960	45	115	49
00115081116F00BFF2	A	SouthChina	Guangdong	Han	Cantonese	Male	221476692	22141.6	98.11	97.25	91.93	89.3	40.36	221274483	99.9087	215397530	97.3	0.02793	212.5	39.5	7.11457	0.992208	0.509968	1.16609e-09	3119390	2902387	95764	121239	2.20319	1.458	166	76	46	9297	3099801	4872	39	104	44
00115081116M16BFF2	A	SouthChina	Guangdong	Han	Cantonese	Female	235189668	23497.9	97.92	96.91	91.63	89.47	40.95	234897619	99.8758	229923190	97.8	0.0309078	190.9	36.7	7.54476	0.986844	0.983019	0.000690892	3161801	2942005	96650	123146	2.20089	1.48809	137	78	43	9418	3142066	7014	38	102	43
00115081118M26BFF2	A	SouthChina	Guangdong	Han	Cantonese	Female	217539324	21747.4	98.5	97.91	93.15	91.35	41.79	217147344	99.8198	211985946	97.4	0.0105569	212.8	39.8	6.98327	0.986041	0.970999	0.000779539	3153946	2935907	96633	121406	2.20113	1.45831	155	73	39	9366	3134274	5075	41	111	50
00115081122M17BFF2	A	EastChina	Jiangxi	Han	Gan	Female	196250056	19608.2	97.67	96.24	90.77	87.6	41.2	195208531	99.4693	192010538	97.8	0.0278755	211.2	39.5	6.27215	0.984309	0.995364	0.000189038	3137454	2921336	95981	120137	2.19814	1.46522	171	85	43	9190	3117988	5921	35	103	52
00115081126M21BFF2	A	CentralChina	Hubei	Han	Mandarin	Female	223604908	22339.3	98.12	96.79	91.64	88.78	40.88	223286772	99.8577	219547556	98.2	0.0386048	195.4	36.7	7.17579	0.98582	0.982557	0.000307272	3151462	2934242	96309	120911	2.19844	1.47155	154	80	43	9296	3131796	8337	45	111	45
00115081127M21BFF2	A	SouthChina	Guangdong	Han	Cantonese	Female	213898372	21379.5	98.24	97.1	92.09	89.16	42.61	213695418	99.9051	206983678	96.8	0.0158815	213.9	41.6	6.86559	0.98559	0.948519	0.000591157	3156786	2939256	96456	121074	2.20007	1.45651	150	71	44	9361	3136989	6613	38	106	44
00115081130M21BFF2	A	SouthChina	Guangdong	Han	Cantonese	Female	214835490	21470	98	96.24	91.49	87.89	44.16	214574804	99.8787	207629748	96.6	0.0141438	217.9	43.2	6.89011	0.977406	0.925282	0.000359924	3136393	2920854	95808	119731	2.2022	1.44931	156	76	50	9283	3116743	8075	48	101	47
00115081131M22BFF2	A	SouthwestChina	Sichuan	Han	Mandarin	Female	223144928	22302.6	98.16	96.66	91.97	88.85	41.35	222894160	99.8876	217668112	97.5	0.0136198	206.7	39.4	7.1634	0.986232	0.982513	9.14024e-08	3161234	2943035	96657	121542	2.20075	1.50426	160	76	43	9402	3141463	7786	33	116	50
00115081132M17BFF2	A	SouthChina	Guangdong	Han	Cantonese	Female	199777270	19971.3	98.34	96.67	92.3	88.08	41.27	199511063	99.8667	195109744	97.7	0.00701963	237	46.3	6.41386	0.985782	0.986958	0.00158559	3155870	2938384	96534	120952	2.20085	1.46692	142	69	41	9327	3136159	4340	36	99	48
00115081133M17BFF2	A	SouthChina	Guangdong	Han	Cantonese	Female	200912158	20070.7	97.44	96.4	89.98	87.98	40.89	200516396	99.803	197163094	98.1	0.0244999	208	39.7	6.44195	0.984745	0.991554	0.000984894	3148932	2931994	96275	120663	2.19925	1.46113	163	74	48	9256	3129310	5761	33	105	46
00115081138F00BFF2	A	SouthChina	Guangdong	Han	Cantonese	Male	211131722	21105.4	97.79	95.83	90.93	86.51	40.65	210832944	99.8585	205556232	97.4	0.0164815	215.4	41.1	6.77332	0.991593	0.513862	0.000342376	3128413	2911498	95978	120937	2.20065	1.47357	154	73	47	9432	3108625	4672	40	109	45
00115081138M17BFF2	A	SouthChina	Guangdong	Han	Cantonese	Female	209359234	20918.2	98.09	96.51	91	88.03	41.05	209090187	99.8715	205671924	98.2	0.0338593	199.3	37.6	6.72001	0.985069	0.993728	0.000547135	3159002	2940339	96791	121872	2.19983	1.48514	172	71	41	9426	3139225	6639	35	96	46
00115081139M25BFF2	A	CentralChina	Hubei	Han	Mandarin	Female	188831590	18878.1	97.65	94.48	90.44	83.58	41.83	188623855	99.89	185236138	98.1	0.0119428	253.7	50.8	6.04889	0.984172	0.963526	0.00100159	3146158	2929646	96114	120398	2.2023	1.45911	164	76	39	9305	3126529	5811	42	118	44
00115081142M17BFF2	A	SouthChina	Guangdong	Han	Cantonese	Female	188214824	18798.8	98.05	96.5	91.35	88.03	40.98	187919103	99.8429	184761998	98.2	0.0353973	200.4	38.3	6.03713	0.982699	0.987302	0.000512043	3141930	2925956	95745	120229	2.19974	1.47923	158	83	44	9194	3122529	7008	38	111	45
00115081145M17BFF2	A	EastChina	Anhui	Han	Mandarin	Female	220337656	22011.4	97.7	97.52	90.92	90.06	41.2	219667165	99.6957	213861280	97.1	0.010151	193.6	43.7	7.04891	0.986401	0.978556	0.00113172	3143804	2928643	95534	119627	2.19886	1.45117	159	77	38	9463	3123396	11519	37	105	50
00115081155M16BFF2	A	SouthChina	Guangdong	Han	Cantonese	Female	239236596	23916.3	98.71	97.94	93	91.04	40.66	238326359	99.6195	232878186	97.3	0.0152597	216.4	42.8	7.66639	0.987303	0.991457	0.000133421	3165754	2945246	97412	123096	2.1957	1.46665	157	72	51	9328	3146072	4967	36	103	49
00115081156M24BFF2	A	SouthChina	Guangdong	Han	Cantonese	Female	202467268	20240.8	98.43	97.59	92.81	90.29	40.95	202185377	99.8608	197659722	97.6	0.0102609	220.8	41.4	6.50395	0.985357	0.975452	0.00100078	3158913	2941565	96360	120988	2.19996	1.46696	156	77	43	9419	3139073	4450	39	112	44
00115081159M17BFF2	A	SouthChina	Guangxi	Zhuang	Zhuang	Female	212355604	21209	97.78	96.5	91.1	88.28	40.8	211965198	99.8162	208540662	98.2	0.0267138	206.4	40.3	6.80613	0.985553	0.995861	0.000922502	3148469	2933319	95891	119259	2.19859	1.457	169	71	34	9288	3128929	10002	38	104	43
00115081161M21BFF2	A	SouthChina	Guangdong	Han	Cantonese	Female	223214112	22310.6	98.04	96.32	91.49	87.94	41.77	222975068	99.8929	218000932	97.7	0.0135343	224.1	43.8	7.16884	0.986327	0.972979	0.000682884	3157159	2938544	97122	121493	2.1992	1.45283	154	69	42	9386	3137400	6456	39	110	45
00115081167F00BFF2	A	SouthChina	Guangdong	Han	Cantonese	Male	206742558	20662.7	98	96.33	90.87	87.27	42.17	205448190	99.3739	201174306	97.3	0.0489617	231.1	49.2	6.60012	0.988989	0.497309	0.00190499	3109535	2895266	95103	119166	2.20306	1.4749	162	83	43	9333	3089938	5297	38	95	44
00115081167M26BFF2	A	SouthChina	Guangdong	Han	Cantonese	Female	216886966	21676.5	97.59	97.6	91.77	90.88	42.05	216543511	99.8416	211259224	97.4	0.0116612	218.1	42.5	6.91665	0.9869	0.957186	0.000897314	3170951	2951615	97348	121988	2.20107	1.48429	166	82	46	9673	3150785	7048	39	122	47
00115081168F00BFF2	A	SouthChina	Guangdong	Han	Cantonese	Male	190681462	19060.1	98.08	96.58	91.15	87.97	42.12	190153310	99.723	186311700	97.7	0.0488516	225.1	47	6.11358	0.986377	0.501236	0.00233014	3121979	2905570	95899	120510	2.20077	1.46485	153	82	49	9381	3102230	4499	32	113	45
00115081168M22BFF2	A	SouthChina	Guangdong	Han	Cantonese	Female	228566026	22848.8	98.57	98.05	93.45	91.86	41.47	228340259	99.9012	222222794	97.2	0.0125041	205	39	7.34429	0.986148	0.964769	0.000683955	3180754	2958780	97927	124047	2.20014	1.4741	174	78	45	9459	3160680	4633	39	114	48
00115081169M16BFF2	A	SouthChina	Guangdong	Han	Cantonese	Female	197240340	19702.3	98.01	96.47	91.24	87.94	40.81	196837132	99.7956	193902948	98.3	0.0353389	201.4	38.4	6.32479	0.983979	0.997081	0.000370157	3132776	2917986	95576	119214	2.20013	1.45475	155	77	40	9198	3113347	6492	34	114	45
00115081172M17BFF2	A	SouthChina	Guangdong	Han	Cantonese	Female	188443904	18831.3	97.99	96.36	91.1	87.64	40.88	187726809	99.6195	184350332	97.8	0.0342422	204.8	38.5	6.0363	0.98242	1.00228	0.00587044	3128717	2914249	95426	119042	2.19859	1.47819	159	66	40	9220	3109292	5246	36	101	44
00115081174M17BFF2	A	SouthChina	Guangdong	Han	Mandarin	Female	197804712	19768.9	98.06	96.89	91.63	89.07	41.2	197533083	99.8627	192569230	97.4	0.007071	201.3	37.9	6.35178	0.984337	0.994132	0.000463377	3168220	2950559	96389	121272	2.20034	1.47698	157	71	42	9350	3148564	4546	37	109	47
00115081175M23BFF2	A	SouthChina	Guangdong	Han	Cantonese	Female	223565290	22348.3	98.59	98.03	93.12	91.43	40.89	222968763	99.7332	217091504	97.1	0.0150906	209.4	43	7.17276	0.986186	0.997596	7.57308e-08	3152719	2936228	95947	120544	2.20035	1.48357	158	75	40	9221	3133141	6585	37	115	45
00115081177F00BFF2	A	SouthChina	Guangdong	Han	Unknown	Male	203300480	20313.9	98.16	96.89	91.61	88.42	41.55	202503746	99.6081	198222654	97.5	0.0422405	225	48.3	6.50117	0.989586	0.505527	0.00189051	3102726	2890830	94415	117481	2.20243	1.45169	159	84	42	9262	3083268	7983	37	99	49
00115081177M26BFF2	A	SouthChina	Guangdong	Han	Hakka	Female	191640536	19144.2	98.22	97.06	91.8	89.21	41.59	190224598	99.2611	186578576	97.4	0.0268722	213	40.2	6.11705	0.983131	0.98691	0.000193221	3123530	2911916	94330	117284	2.2027	1.45718	149	84	44	9135	3104159	7668	39	111	44
00115081180M20BFF2	A	SouthChina	Guangdong	Han	Cantonese	Female	206005018	20583.7	97.69	96.97	91.33	89.43	43.8	205610559	99.8085	196758984	95.5	0.0134352	224.8	47.5	6.59484	0.980733	0.91688	1.5601e-07	3129515	2916355	94991	118169	2.20285	1.44777	161	79	43	9381	3109748	12370	30	113	49
00115081183M22BFF2	A	SouthChina	Guangdong	Han	Cantonese	Female	217968174	21772.1	98.21	97.21	91.78	89.59	40.98	216739927	99.4365	212825586	97.6	0.0280287	208.3	39.9	6.96553	0.985779	0.989066	0.00270241	3148866	2930726	96779	121361	2.19962	1.46686	150	69	40	9233	3129290	5427	38	115	43
00115081185M27BFF2	A	SouthChina	Guangdong	Han	Cantonese	Female	177724656	17769.9	98.15	96.27	91.51	86.25	41.49	177555921	99.9051	174448580	98.2	0.00836204	263	52.4	5.71237	0.983103	0.967775	0.000864674	3143856	2928381	95989	119486	2.19862	1.47603	159	90	51	9310	3124011	4170	40	117	49
00115081188M20BFF2	A	SouthChina	Guangdong	Han	Cantonese	Female	203604908	20343.5	97.79	97.01	91.68	89.58	44.48	203011715	99.7087	195224972	95.9	0.0122949	220.7	45.3	6.51337	0.971545	0.904457	0.000634755	3132587	2917408	96056	119123	2.20449	1.50921	147	80	44	9287	3112883	11397	34	109	43
00115081189F00BFF2	A	CentralChina	Hunan	Han	Xiang	Male	219843000	21972.8	98.08	96.56	91.14	87.87	42.25	219237024	99.7244	214459148	97.6	0.0466961	224.7	46.5	7.04808	0.98947	0.494517	9.72999e-07	3120465	2903211	96262	120992	2.19927	1.4869	162	82	37	9475	3100535	6928	39	112	48
00115081189M26BFF2	A	CentralChina	Hunan	Han	Xiang	Female	200844488	20079.9	97.77	95.15	90.87	85.17	41.86	200623318	99.8899	196490732	97.8	0.0127911	237.6	45.3	6.43744	0.985113	0.963677	0.00138527	3155618	2937633	96371	121614	2.19981	1.48759	158	75	43	9323	3136039	6064	34	113	50
00115081193M25BFF2	A	SouthChina	Guangdong	Han	Cantonese	Female	208353964	20829.1	98.5	97.75	92.72	90.46	40.78	208085580	99.8712	202981826	97.4	0.0147312	222.6	46.5	6.69339	0.985415	0.976522	0.000744236	3148871	2931304	96318	121249	2.20161	1.47798	154	80	40	9270	3129415	4612	40	113	46
00115081194F00BFF2	A	SouthChina	Guangdong	Han	Cantonese	Male	223203922	22304.2	98.1	96.69	91.24	88.27	42.27	222881028	99.8553	216580986	97	0.0543246	221	47.9	7.15748	0.990769	0.508145	0.000120122	3122421	2905620	95957	120844	2.20154	1.46894	160	75	45	9459	3102755	6122	39	117	50
00115081194M16BFF2	A	SouthChina	Guangdong	Han	Cantonese	Female	191259822	19115	97.2	94.92	89.64	85.02	40.92	191057488	99.8942	186195498	97.4	0.019386	210.6	40.3	6.13982	0.983182	1.00119	0.00272957	3157580	2939468	96529	121583	2.19971	1.48505	160	77	44	9209	3138123	4563	41	109	50
00115081195M18BFF2	A	SouthChina	Guangdong	Han	Cantonese	Female	227645256	22744.2	98.36	96.98	92.17	88.93	40.74	227207046	99.8075	223673958	98.3	0.0276959	205.6	39.9	7.30076	0.986301	1.0029	0.000360896	3180447	2959336	97706	123405	2.19803	1.5082	170	74	44	9565	3160434	5686	40	109	48
00115081199F00BFF2	A	SouthChina	Guangdong	Han	Cantonese	Male	212567288	21245.4	98.07	96.7	91.24	87.85	42.45	212145477	99.8016	208133866	97.9	0.0435828	234.7	49.1	6.8191	0.980619	0.509637	0.00045186	3126204	2909582	96226	120396	2.20087	1.46737	160	88	40	9381	3106411	5884	38	124	43
00115081199M24BFF2	A	SouthChina	Guangdong	Han	Cantonese	Female	195403556	19534.6	96.91	96.66	90.1	87.85	41.73	195173091	99.8821	191470066	98	0.0109815	230.7	43.3	6.22764	0.984643	0.963744	2.54759e-07	3152589	2934828	96550	121211	2.20053	1.50133	156	83	37	9389	3132939	4247	34	119	49
00115081204M25BFF2	A	SouthChina	Guangdong	Han	Cantonese	Female	236131906	23606.7	98	96.11	91.74	87.6	41.18	235827696	99.8712	230335676	97.5	0.014901	214.3	39.4	7.56861	0.987373	0.971345	0.000555871	3167857	2947832	97215	122810	2.19808	1.48525	151	75	43	9328	3148216	4719	39	116	48
00115081205F00BFF2	A	CentralChina	Hunan	Han	Unknown	Male	223227882	22311.1	98.09	96.8	91.33	88.09	41.92	222938269	99.8703	218144458	97.7	0.0438121	231.3	49.4	7.16375	0.988839	0.511747	0.000420627	3126179	2907510	96598	122071	2.19749	1.49078	166	70	43	9277	3106660	7701	43	113	48
00115081205M18BFF2	A	SouthChina	Guangdong	Han	Min	Female	216841836	21675.9	98.5	97.53	93.08	90.61	41.2	216511476	99.8476	211174688	97.4	0.00861601	211.4	39.5	6.96096	0.986462	0.979387	8.29666e-08	3162206	2941286	97707	123213	2.20107	1.46365	157	91	52	9331	3142539	5137	38	115	48
00115081206M27BFF2	A	SouthChina	Guangdong	Han	Cantonese	Female	224602314	22450.5	98.05	97.61	91.47	89.91	40.98	224094148	99.7737	220956522	98.4	0.0186991	210.5	40.2	7.20338	0.98683	0.978375	0.000859653	3139457	2923897	95761	119799	2.20059	1.45235	150	74	48	9208	3119944	8512	35	121	41
00115081207M25BFF2	A	NorthwestChina	Shaanxi	Han	Mandarin	Female	211685714	21160.3	97.92	95.75	91.45	86.72	41.23	211414023	99.8717	206634278	97.6	0.014142	222.8	43	6.78149	0.986359	0.982174	1.49753e-08	3154878	2937837	96107	120934	2.19985	1.48913	152	84	39	9294	3135306	7355	32	115	43
00115081208M18BFF2	A	SouthChina	Guangdong	Han	Hakka	Female	221943570	22177	98.44	96.97	92.56	88.96	40.9	221614341	99.8517	217775242	98.1	0.0280948	203.9	39.2	7.12156	0.986119	0.970818	6.63839e-07	3159993	2940801	97097	122095	2.201	1.47359	166	80	41	9383	3140230	6423	37	100	53
00115081219M18BFF2	A	SouthChina	Guangdong	Han	Cantonese	Female	195860164	19570.1	98.05	96.97	91.13	88.99	40.93	195589008	99.8616	191280796	97.7	0.025275	199.4	39.5	6.2852	0.983859	0.984182	0.00551485	3136485	2921641	95399	119445	2.20157	1.48996	150	71	44	9411	3116865	7237	37	109	48
00115081220M26BFF2	A	SouthChina	Guangdong	Han	Cantonese	Female	195487552	19543.7	98.17	95.75	91.99	86.67	42.27	195248182	99.8776	191834658	98.1	0.00687608	247.7	47.2	6.27143	0.984061	0.961052	3.63048e-08	3142246	2927075	95890	119281	2.19908	1.48195	151	73	42	9390	3122595	5136	39	128	43
00115081225M18BFF2	A	SouthChina	Guangdong	Han	Cantonese	Female	219318296	21923.7	98.43	97.2	92.76	89.66	41.11	219062126	99.8832	213667682	97.4	0.00923766	222.4	42.7	7.04134	0.986591	0.987481	0.000511694	3156405	2937065	97128	122212	2.19987	1.44898	162	74	46	9342	3136719	5108	33	107	45
00115081226M19BFF2	A	SouthChina	Guangdong	Han	Cantonese	Female	217095394	21700.7	97.62	97.67	91.82	90.84	40.92	216553458	99.7504	212080976	97.7	0.00596963	220.9	42.8	6.9435	0.986447	0.992976	0.000752938	3154314	2936457	96463	121394	2.19912	1.47209	156	75	38	9288	3134808	5207	40	107	47
00115081228M20BFF2	A	CentralChina	Hunan	Han	Unknown	Female	195997430	19580.4	98.27	96.24	91.72	86.95	40.72	195643733	99.8195	192641318	98.3	0.0242682	224.6	44.3	6.2885	0.984564	0.979798	0.000400947	3158236	2940036	96804	121396	2.20229	1.46536	145	82	44	9356	3138528	6654	44	110	50
00115081229M19BFF2	A	CentralChina	Hunan	Han	Xiang	Female	206586464	20644.5	98.38	97.34	92.28	89.64	42.14	205885533	99.6607	201263462	97.4	0.00890436	197.9	42.1	6.61518	0.98338	0.947631	0.00150908	3149108	2932972	95904	120232	2.20305	1.46362	172	76	48	9320	3129471	7296	38	104	45
00115081235M24BFF2	A	SouthChina	Guangdong	Han	Hakka	Female	204917614	20486.2	98.24	95.69	92.19	86.46	41.36	204711647	99.8995	201114018	98.1	0.00827163	244.7	47.2	6.57593	0.986086	0.961333	1.06424e-07	3144503	2927666	96246	120591	2.20142	1.45801	156	82	45	9198	3125024	4787	42	102	45
00115081236F00BFF2	A	SouthChina	Guangdong	Han	Cantonese	Male	228312750	22824.7	98.2	97.35	92.24	89.55	40.28	228070051	99.8937	222094250	97.3	0.0262631	209.9	38.6	7.33287	0.992363	0.520007	0.00122388	3135913	2916647	96601	122665	2.19897	1.47268	149	76	50	9270	3116356	4415	36	116	46
00115081236M24BFF2	A	SouthChina	Guangdong	Han	Cantonese	Female	204724890	20463.5	98.08	96.06	91.23	86.91	41.06	204416919	99.8496	199666568	97.5	0.0197704	219.6	40.5	6.57337	0.98517	0.990476	3.85428e-07	3166849	2947470	96913	122466	2.19898	1.50613	156	78	49	9317	3147100	4289	35	113	48
00115081240M18BFF2	A	SouthChina	Guangdong	Han	Cantonese	Female	202655630	20248.4	98.04	96.42	90.92	87.36	41.13	201977081	99.6652	198533122	98	0.0229259	221.2	41.9	6.49333	0.985052	0.976937	5.66644e-08	3160312	2942231	96559	121522	2.20132	1.49333	151	73	46	9371	3140682	6293	37	120	51
00115081243M24BFF2	A	NortheastChina	Liaoning	Manchu	Mandarin	Female	201144438	20099.6	97.8	97.97	92.38	91.73	43.78	200015659	99.4388	193723062	96.3	0.0116555	215.1	41.1	6.39886	0.978448	0.928364	0.00253448	3154151	2937634	96442	120075	2.20192	1.47744	157	81	48	9574	3134040	8430	42	102	46
00115081246F00BFF2	A	SouthChina	Guangdong	Han	Unknown	Male	184714588	18461.2	97.79	95.88	91.03	86.83	41.31	184509144	99.8888	175747750	95.1	0.0147841	211	43.3	5.9227	0.987793	0.504799	0.000107429	3118290	2902599	95434	120257	2.20363	1.48472	167	90	47	9297	3098687	7384	40	106	48
00115081246M16BFF2	A	SouthChina	Guangdong	Han	Cantonese	Female	205942710	20583.9	97.18	95.16	89.63	85.61	41.3	205670038	99.8676	199974394	97.1	0.0177987	206.4	38.4	6.60962	0.984176	0.997743	0.000283287	3157446	2939086	96595	121765	2.20221	1.47748	160	89	39	9333	3137796	4566	33	105	43
00115081252F00BFF2	A	SouthChina	Guangdong	Han	Cantonese	Male	223286940	22316.3	98.61	96.84	92.94	88.95	41.12	222779250	99.7726	215378052	96.5	0.0220666	206.3	38.3	7.16271	0.991714	0.509979	0.000259305	3135234	2916323	96790	122121	2.20048	1.46762	157	88	52	9287	3115594	4340	42	114	45
00115081252M19BFF2	A	SouthChina	Guangdong	Han	Cantonese	Female	255615548	25531.2	97.47	95.88	90.29	86.75	40.98	254918974	99.7275	250222880	97.9	0.0117215	190.7	41.7	8.18093	0.986995	1.00501	0.000722311	3158923	2937553	97550	123820	2.20022	1.45973	160	96	43	9384	3138885	6063	35	112	52
00115081253M18BFF2	A	SouthChina	Guangdong	Han	Cantonese	Female	196907134	19676.3	98.06	96.16	91.25	87.32	41.13	196600570	99.8443	189935756	96.5	0.0225022	213.6	42.3	6.31831	0.984441	0.991107	1.02286e-09	3135226	2919351	95819	120056	2.19886	1.47	159	85	43	9323	3115659	7084	32	116	46
00115081254M27BFF2	A	SouthChina	Guangdong	Han	Cantonese	Female	215620646	21556.7	98.27	95.76	92.36	86.64	41.38	215001327	99.7128	211420608	98.1	0.00718653	238.7	45.4	6.9111	0.986941	0.986638	0.000941533	3178509	2958657	97520	122332	2.19616	1.4728	159	76	42	9451	3158630	4777	37	114	45
00115081256F00BFF2	A	SouthChina	Guangdong	Han	Cantonese	Male	200839652	20076.1	98.02	95.58	91.29	85.92	40.42	200622966	99.8921	195297868	97.2	0.0171276	213.6	42.4	6.44528	0.990822	0.517178	5.50012e-08	3112826	2896796	95505	120525	2.19769	1.49558	169	77	49	9109	3093694	5429	34	109	46
00115081256M27BFF2	A	SouthChina	Guangdong	Han	Cantonese	Female	223447200	22338.3	98.31	95.99	92.58	87.27	41.75	223118800	99.853	218669764	97.9	0.00849986	231.3	44	7.16899	0.986687	0.951962	0.000731909	3163786	2944113	97447	122226	2.20103	1.46678	158	76	50	9401	3144122	5249	38	112	46
00115081258M23BFF2	A	SouthChina	Guangdong	Han	Cantonese	Female	200401914	20026.1	97.56	97.27	91.42	89.48	43.52	200254290	99.9263	192341082	96	0.0103191	240.9	51.6	6.39939	0.98101	0.902035	1.30581e-07	3142914	2927144	95893	119877	2.20377	1.47022	150	81	50	9245	3123508	10189	33	113	48
00115081259M24BFF2	A	CentralChina	Hunan	Han	Mandarin	Female	226815398	22675.2	97.05	97.12	90.59	89.15	41.5	226543329	99.88	221799528	97.8	0.0119769	219.2	40.4	7.2297	0.98705	0.973671	0.000213554	3161294	2942691	96899	121704	2.20015	1.50294	147	77	51	9363	3141727	6868	38	102	56
00115081268M18BFF2	A	CentralChina	Hunan	Han	Mandarin	Female	210587924	21048.9	97.7	97.83	92.11	91.37	41.7	210329260	99.8772	205559766	97.6	0.00677159	219.1	42.1	6.73998	0.985547	0.970644	0.00152044	3169204	2951000	96861	121343	2.1983	1.45209	162	74	38	9460	3149432	7248	40	107	44
00115081274M19BFF2	A	SouthChina	Guangdong	Han	Cantonese	Female	221259754	22107.3	97.94	97.55	92	91.14	43.38	220221275	99.5307	213489754	96.5	0.0140818	205.7	40.9	7.07094	0.983207	0.940031	0.00103264	3145499	2928886	96045	120568	2.20123	1.45888	162	80	43	9496	3125628	7401	36	115	55
00115081276M24BFF2	A	SouthChina	Guangdong	Han	Cantonese	Female	238223974	23814.5	97.07	97.27	90.66	89.58	41.1	237669696	99.7673	232924818	97.8	0.0115157	214.1	39.7	7.58713	0.987299	0.997942	0.00380584	3149708	2931346	96635	121727	2.19878	1.48111	163	72	37	9370	3129962	5079	42	94	37
00115081280M19BFF2	A	SouthChina	Guangdong	Han	Cantonese	Female	195499696	19536.6	97.81	97.05	91.74	89.7	43.83	195234572	99.8644	186417562	95.4	0.0144665	222.1	45.7	6.26287	0.979091	0.893776	2.82789e-08	3122391	2907942	95351	119098	2.20105	1.41787	141	79	48	9330	3102777	8299	40	103	46
00115081291M23BFF2	A	SouthChina	Guangdong	Han	Cantonese	Female	196734036	19665.4	98.06	95.95	91.19	86.66	40.86	196494306	99.8781	191029746	97.1	0.0208716	217.6	40.9	6.31865	0.983996	1.00798	0.00204308	3126570	2911355	95632	119583	2.20081	1.43567	157	72	43	9311	3106986	4321	36	97	49
00115081293M24BFF2	A	CentralChina	Hubei	Han	Mandarin	Female	193372594	19330.4	96.97	97.07	90.34	89.02	42.11	193105365	99.8618	189299742	97.9	0.0111777	223.3	42	6.16266	0.983925	0.957538	1.69265e-07	3143845	2928221	95752	119872	2.20338	1.47135	148	63	45	9332	3124196	6189	42	113	52
00115081297M24BFF2	A	SouthChina	Guangdong	Han	Cantonese	Female	180066800	18001.3	98.09	94.37	91.58	83.28	41.6	179880545	99.8966	176973596	98.3	0.00729624	257.8	52.6	5.77706	0.983597	0.954735	8.65146e-07	3121695	2907860	95086	118749	2.20259	1.42553	140	91	41	9297	3102095	4067	34	112	42
00115081298F00BFF2	A	NorthwestChina	Shaanxi	Han	Mandarin	Male	229331626	22920.9	97.88	96.15	91.27	87.39	41.09	229056021	99.8798	221380638	96.5	0.0148592	207.3	40.8	7.35842	0.993304	0.511284	0.00140502	3154164	2933954	97371	122839	2.19973	1.52141	144	86	37	9380	3134521	9542	39	107	43
00115081298M19BFF2	A	NorthwestChina	Shaanxi	Han	Mandarin	Female	196274162	19605.4	97.81	97.01	91.78	89.67	44.83	195724621	99.72	181443684	92.4	0.0132856	216.8	46.8	6.27005	0.968407	0.905607	0.00143158	3174822	2955249	97638	121935	2.20565	1.52769	154	81	39	9445	3154789	16313	39	104	49
00115081300M19BFF2	A	EastChina	Shandong	Han	Mandarin	Female	210518902	21046.1	97.58	97.6	91.67	90.61	41.34	209856146	99.6852	205934266	97.8	0.00573723	225.2	42.6	6.72763	0.986222	0.991893	0.000815056	3146859	2930014	96406	120439	2.20026	1.49379	151	71	43	9309	3127350	7292	39	118	41
00115081301M19BFF2	A	CentralChina	Hubei	Han	Mandarin	Female	229313862	22919	98.47	96.8	92.42	88.6	40.96	228216165	99.5213	222301476	96.9	0.0215045	214.6	39.6	7.33907	0.986665	1.00089	0.00746725	3158358	2938829	96989	122540	2.19922	1.47561	156	82	45	9306	3138729	6526	41	106	39
00115081307M16BFF2	A	SouthChina	Guangdong	Han	Cantonese	Female	233208318	23311.2	97.68	97.89	92.08	91.61	41.69	232749950	99.8035	227584946	97.6	0.00618098	212.9	39.9	7.45844	0.986631	0.986344	8.83354e-08	3150981	2932855	96648	121478	2.19781	1.48603	149	81	41	9261	3131507	6338	37	103	40
00115081309M17BFF2	A	SouthChina	Guangdong	Han	Cantonese	Female	204536500	20445.1	97.55	97.48	91.62	90.32	43.18	204100816	99.787	198270216	96.9	0.00666615	227.1	43.8	6.53806	0.981746	0.93515	0.000200143	3147291	2931290	96143	119858	2.20055	1.47528	163	82	40	9398	3127373	6131	41	111	48
00115081312M18BFF2	A	SouthChina	Guangdong	Han	Cantonese	Female	217422776	21731.9	98.11	96.1	91.41	87.1	41.26	217074422	99.8398	210787534	96.9	0.020728	211.8	39.3	6.98104	0.986061	0.994017	7.44969e-05	3165406	2946561	97079	121766	2.19936	1.466	150	76	45	9322	3145773	4823	34	111	37
00115081314M23BFF2	A	SouthChina	Guangdong	Han	Cantonese	Female	214026042	21394.3	97.97	97.4	91.14	89.2	40.79	213729293	99.8613	210692266	98.4	0.0141552	215.7	41.2	6.87239	0.986043	0.994565	0.000419937	3155207	2938793	96211	120203	2.19983	1.49817	152	73	41	9206	3135756	9782	38	114	48
00115081316M24BFF2	A	SouthChina	Guangdong	Han	Mandarin	Female	203963658	20381.5	97.71	97.57	91.97	90.48	43.69	203192562	99.6219	195198670	95.7	0.00962564	226.1	45.9	6.49779	0.980468	0.905006	0.0021277	3147680	2930250	96751	120679	2.20111	1.45556	173	83	43	9402	3127848	7931	33	118	44
00115081319M18BFF2	A	SouthChina	Guangdong	Han	Hakka	Female	209413050	20930.6	97.92	95.96	91.11	87.02	42.75	209201779	99.8991	202975918	96.9	0.0120256	226.5	44.4	6.72054	0.983729	0.940268	0.000414133	3157834	2941474	95888	120472	2.20077	1.48805	157	78	43	9485	3138005	7852	38	114	44
00115081324M19BFF2	A	SouthChina	Guangdong	Han	Cantonese	Female	193471048	19338.9	97.9	95.84	90.98	86.73	42.06	193262377	99.8921	188929684	97.7	0.0152182	231.4	45.8	6.20835	0.982542	0.966141	0.000673024	3144199	2928170	95993	120036	2.20341	1.49666	167	65	41	9282	3124590	6604	37	117	46
00115081327M17BFF2	A	SouthChina	Guangdong	Han	Hakka	Female	199469844	19935.4	97.57	97.61	91.82	90.91	44.91	198711490	99.6198	191803472	96.2	0.00619133	213.7	41.8	6.36027	0.969092	0.88287	0.000138529	3124088	2909701	95285	119102	2.2077	1.45382	170	92	45	9435	3104279	6803	47	116	53
00115081333F00BFF2	A	EastChina	Shandong	Han	Mandarin	Male	183019746	18291.2	97.8	96.11	91.04	87.34	40.94	182740552	99.8475	177092034	96.8	0.0142843	211.6	42.2	5.86936	0.987765	0.514801	0.00257201	3091360	2881104	93752	116504	2.19874	1.46039	154	74	44	9100	3072132	10489	34	111	50
00115081333M18BFF2	A	NortheastChina	Liaoning	Manchu	Mandarin	Female	201204090	20110.8	96.82	97.27	90.34	89.82	43.95	200734242	99.7665	194857918	96.8	0.00773886	230.6	46	6.40447	0.974434	0.913693	0.000437387	3119532	2908077	94445	117010	2.20395	1.46921	155	63	48	9518	3099592	13846	31	119	53
00115081334M26BFF2	A	SouthChina	Guangdong	Han	Cantonese	Female	230761682	23067.5	98.35	96.17	92.78	87.72	41.75	230456575	99.8678	225756054	97.8	0.00958066	225.9	43.8	7.402	0.987053	0.968002	0.000820978	3173463	2955269	96932	121262	2.19911	1.50111	154	73	45	9416	3153631	8205	29	105	54
00115081335M25BFF2	A	SouthChina	Guangdong	Han	Cantonese	Female	213143370	21305.9	97.98	97.43	91.22	89.37	41.28	212974324	99.9207	209644312	98.4	0.0172538	213.6	40.1	6.84542	0.986089	0.980664	3.41762e-07	3141736	2926417	95638	119681	2.20228	1.45621	164	80	40	9194	3122384	8568	39	97	45
00115081336M16BFF2	A	SouthChina	Guangdong	Han	Cantonese	Female	214521780	21442.3	96.82	97.28	90.36	89.81	43.24	213960692	99.7384	207809464	96.9	0.00817799	230.9	45.9	6.8254	0.983676	0.944482	0.000452025	3142176	2925965	96251	119960	2.20394	1.46107	144	75	43	9506	3122294	6802	34	124	40
00115081337M16BFF2	A	SouthChina	Guangdong	Han	Cantonese	Female	213877600	21378.8	96.91	97.29	90.63	89.84	43.32	213382263	99.7684	206955734	96.8	0.00837316	226.6	44.4	6.81171	0.982638	0.948504	0.000482776	3138097	2922836	95869	119392	2.20223	1.47197	158	89	48	9525	3118083	6123	41	104	46
00115081339M24BFF2	A	SouthChina	Guangdong	Han	Mandarin	Female	243397170	24333.1	98.35	96.25	92.74	87.96	41.36	243089654	99.8737	237937784	97.8	0.00851419	221.3	42.9	7.81129	0.987922	0.983737	2.42584e-07	3157452	2937945	97214	122293	2.2018	1.45484	161	77	49	9325	3137830	5196	34	95	47
00115081340F00BFF2	A	SouthChina	Guangdong	Han	Cantonese	Male	227760982	22764.1	98.12	96.08	91.69	87.23	40.77	227464799	99.87	218910012	96.1	0.0193423	204.4	41.2	7.30514	0.993131	0.511944	3.6122e-07	3133862	2914086	97145	122631	2.19945	1.46941	147	71	44	9313	3114217	6459	37	110	49
00115081340M25BFF2	A	SouthChina	Guangdong	Han	Cantonese	Female	217961588	21786.8	98.31	97.63	92.47	90.51	41.62	217671188	99.8668	213111612	97.8	0.00798624	203.2	37.9	6.9962	0.986119	0.975062	2.2028e-07	3173778	2952249	97919	123610	2.19849	1.46982	167	84	44	9375	3154007	4948	36	114	41
00115081341F00BFF2	A	SouthChina	Guangdong	Han	Cantonese	Male	203303868	20318.6	98.02	96.31	90.95	87.21	42.24	202808365	99.7563	198782734	97.8	0.0464575	230.2	48.4	6.51855	0.987814	0.498249	0.00123541	3126995	2909408	96433	121154	2.20103	1.48293	156	83	44	9363	3107233	5445	31	115	40
00115081341M24BFF2	A	SouthChina	Guangdong	Han	Cantonese	Female	204525164	20445.5	98.16	97.04	91.79	88.66	42.16	204262570	99.8716	200121878	97.8	0.00775025	226	43.5	6.56572	0.98505	0.958266	2.85994e-07	3162463	2942583	97304	122576	2.20098	1.4835	170	84	48	9363	3142761	5127	39	111	48
00115081343M26BFF2	A	SouthChina	Guangdong	Han	Cantonese	Female	171218846	17116.1	97.67	96.44	90.08	86.31	41.17	170980894	99.861	169007386	98.7	0.012575	244.5	49.4	5.49527	0.981637	0.975997	0.000602781	3124623	2910154	95534	118935	2.20095	1.46026	153	71	38	9366	3104978	4477	44	119	47
00115081350F00BFF2	A	SouthChina	Guangdong	Han	Unknown	Male	200438624	20028.8	97.91	96.54	91.46	88.48	40.8	200103726	99.8329	193088172	96.3	0.0163759	202.8	39.8	6.42441	0.990316	0.510516	0.00134376	3121805	2904804	96164	120837	2.19845	1.49287	167	77	46	9374	3102170	6974	36	107	50
00115081350M17BFF2	A	SouthChina	Guangdong	Han	Min	Female	177380450	17731	98.05	95.89	91.19	86.61	40.94	177135188	99.8617	172621280	97.3	0.0213625	217.4	41.5	5.69641	0.981238	1.00468	2.06101e-08	3161806	2943194	96799	121813	2.19722	1.4822	165	71	44	9356	3142130	3568	35	105	42
00115081353M17BFF2	A	SouthChina	Guangxi	Han	Cantonese	Female	185772484	18565.1	96.89	97.28	90.6	89.95	44.26	184973859	99.5701	177576130	95.6	0.00913808	225.6	46.7	5.89776	0.972352	0.91487	3.70711e-07	3124097	2909783	95739	118575	2.2043	1.46306	153	88	43	9365	3104406	8260	34	105	47
00115081358M17BFF2	A	SouthChina	Guangdong	Han	Cantonese	Female	213440118	21336.3	96.95	97.4	90.73	90.17	41.58	213054694	99.8194	207466198	97.2	0.00750598	227	44.8	6.80143	0.986599	0.967786	0.00119516	3151005	2933974	96307	120724	2.1996	1.48318	153	73	39	9317	3131381	5423	43	104	49
00115081363M24BFF2	A	SouthChina	Guangdong	Han	Cantonese	Female	216392078	21622.6	98.14	97.61	92.03	90.52	40.96	215484605	99.5806	210956484	97.5	0.0230337	185.4	33.6	6.91822	0.985558	0.99451	0.000132004	3156493	2938533	96305	121655	2.2001	1.44387	169	92	48	9405	3136641	5656	35	110	46
00115081364M17BFF2	A	SouthChina	Guangdong	Han	Min	Female	242082766	24196	97.2	97.97	91.66	92.03	42.4	240680203	99.4206	233899444	96.6	0.0102535	198.7	36.3	7.68402	0.986667	0.96247	0.00529973	3179249	2959259	97278	122712	2.20123	1.5034	162	84	48	9343	3159614	5365	33	103	42
00115081367F00BFF2	A	SouthChina	Guangdong	Han	Cantonese	Male	215737458	21564.1	97.97	96.27	90.7	87.06	41.32	215264391	99.7807	211908018	98.2	0.0408632	234.8	49.2	6.92185	0.9907	0.511019	1.36472e-07	3134779	2916487	96463	121829	2.19782	1.46354	171	92	40	9362	3115061	4732	34	107	46
00115081367M23BFF2	A	SouthChina	Guangdong	Han	Cantonese	Female	223758504	22357	97.77	97.81	92.16	91.21	43.19	223505211	99.8868	215868700	96.5	0.0131432	221.5	45.8	7.14576	0.984345	0.918237	7.44648e-08	3164447	2944452	97373	122622	2.20136	1.48362	163	81	48	9542	3144454	8432	39	123	46
00115081368M26BFF2	A	NortheastChina	Liaoning	Han	Mandarin	Female	211131740	21105.3	97.14	97.12	89.81	88.95	41.13	210932948	99.9058	207513462	98.3	0.00970604	213.1	40.2	6.77577	0.986257	0.980737	3.06092e-08	3160135	2941654	96685	121796	2.20188	1.48796	149	70	39	9318	3140476	8752	41	116	48
00115081370F00BFF2	A	CentralChina	Hunan	Han	Unknown	Male	220400252	22029.4	97.76	95.71	90.85	86.29	41.09	220138356	99.8812	210545464	95.5	0.0134608	218.5	44.7	7.06825	0.993115	0.507905	0.0012293	3134619	2916494	96600	121525	2.20013	1.49753	163	79	39	9357	3114895	9995	41	103	47
00115081370M17BFF2	A	CentralChina	Henan	Han	Mandarin	Female	221271546	22116.5	97.94	97.5	92.14	90.88	41.56	220677743	99.7316	214976354	97.2	0.0136143	211.7	41.2	7.09349	0.98692	0.981184	0.000748657	3187390	2966208	97896	123286	2.19909	1.49705	153	74	48	9339	3167649	8777	42	116	46
00115081375M17BFF2	A	SouthChina	Guangdong	Han	Cantonese	Female	231317112	23120	96.95	97.48	90.8	90.47	44.11	230983801	99.8559	223246582	96.5	0.0104369	221.7	43.1	7.36843	0.97843	0.90409	0.00110556	3163482	2945176	97089	121217	2.20314	1.49455	164	79	46	9390	3143699	8282	39	118	52
00115081381F00BFF2	A	SouthChina	Guangdong	Han	Cantonese	Male	219962966	21987.9	98.13	96.81	91.35	88.56	40.9	219585580	99.8284	215065810	97.8	0.0431057	217.2	44.6	7.05959	0.991206	0.516667	0.00052294	3131152	2912850	96563	121739	2.19681	1.46368	168	80	44	9427	3111288	5084	31	104	42
00115081381M24BFF2	A	SouthChina	Guangdong	Han	Cantonese	Female	186374274	18630.8	97.53	96.5	90.45	87.34	41.12	186206648	99.9101	183204490	98.3	0.0206293	216.9	39.6	5.96294	0.983706	0.963661	0.00016015	3152092	2934195	96336	121561	2.2016	1.47683	154	80	43	9183	3132698	4613	42	119	47
00115088004M21BFF2	A	NorthwestChina	Xinjiang	Han	Mandarin	Female	251491274	25137	97.64	97.6	91.51	90.46	41.41	251186786	99.8789	245134690	97.5	0.0130689	209.4	39.2	8.05367	0.987714	0.977695	0.000559857	3168776	2948452	97422	122902	2.20229	1.4992	161	80	42	9479	3148982	9966	42	107	47
00115088013F00BFF2	A	SouthChina	Guangdong	Han	Cantonese	Male	203372144	20324.1	98.03	96.4	91.05	87	42.06	202939707	99.7874	198368006	97.5	0.0418106	240.5	53.2	6.52099	0.987805	0.499786	6.06735e-08	3119368	2902376	96242	120750	2.20222	1.47068	157	81	49	9299	3099824	5641	35	103	45
00115088013M22BFF2	A	SouthChina	Guangdong	Han	Cantonese	Female	217852332	21770.3	97.48	97.01	90.95	88.8	43.41	217561279	99.8664	210868454	96.8	0.0136398	218.7	43.7	6.96441	0.97986	0.921294	0.0022419	3158331	2940064	97046	121221	2.20269	1.46659	171	72	47	9452	3138398	8206	35	110	47
00115088015M24BFF2	A	CentralChina	Hunan	Han	Xiang	Female	212574134	21249.1	98.2	97.25	91.92	89.28	41.86	212366791	99.9025	207979922	97.8	0.00767965	218.7	42.6	6.82699	0.985572	0.960358	0.000264143	3153749	2936217	96554	120978	2.20231	1.47014	163	57	46	9365	3134105	6397	40	114	47
00115089001M19BFF2	A	SouthChina	Guangdong	Han	Cantonese	Female	217187092	21708.2	97.83	97.17	91.24	89.18	40.74	216809850	99.8263	213169888	98.2	0.027559	207.1	39.2	6.97096	0.986023	0.989767	2.04992e-07	3161330	2943033	96791	121506	2.19802	1.46544	154	78	42	9259	3141609	5655	45	113	45
00115089003M25BFF2	A	SouthChina	Guangxi	Han	Hakka	Female	203123192	20302	97.7	97.68	91.95	90.76	43.32	202475172	99.681	195598792	96.3	0.00979836	228	46.2	6.47741	0.981	0.899814	3.70974e-08	3154587	2937839	96327	120421	2.20382	1.49364	184	76	52	9395	3134782	7301	40	110	51
00115089004M20BFF2	A	SouthChina	Guangdong	Han	Cantonese	Female	183458246	18328.7	98.39	98.23	94.44	93.95	41.03	181847583	99.1221	177403274	96.7	0.0175473	220.5	47	5.84207	0.983278	0.990967	0.000461132	3147058	2930151	96354	120553	2.20091	1.43574	146	72	41	9238	3127594	4765	32	113	48
00115089006F00BFF2	A	SouthChina	Guangdong	Han	Unknown	Male	215305898	21521.3	98.07	96.49	91.16	87.78	42.5	214827050	99.7776	208462808	96.8	0.0439073	221	48.5	6.90175	0.986863	0.501417	0.000941477	3130930	2913659	95989	121282	2.19973	1.49971	143	77	40	9398	3111232	5371	35	112	57
00115089006M27BFF2	A	SouthwestChina	Sichuan	Han	Mandarin	Female	208966796	20888.5	98.27	97.37	92.21	89.62	42.16	208682265	99.8638	204413998	97.8	0.00724872	218.1	42	6.70906	0.984872	0.959415	0.00132932	3165702	2945891	97096	122715	2.20458	1.4974	168	88	48	9454	3145825	6642	34	103	48
00115091004M18BFF2	A	SouthChina	Guangdong	Han	Hakka	Female	222011344	22188.4	97.52	97.23	91.11	89.38	42.62	221766001	99.8895	216007706	97.3	0.013665	220.1	43.5	7.10593	0.985138	0.958968	7.61173e-08	3163684	2945114	96925	121645	2.20016	1.48631	163	70	51	9396	3143777	6910	45	120	48
00115091009M21BFF2	A	SouthChina	Guangdong	Han	Cantonese	Female	231847648	23178.5	96.9	96.64	90.01	87.65	41.13	231558734	99.8754	227553238	98.1	0.0109621	236.1	45.3	7.39143	0.987455	0.987942	0.00022943	3163961	2944283	97120	122558	2.19894	1.49083	159	88	52	9405	3144107	5159	36	112	45
00115091010M24BFF2	A	SouthChina	Guangdong	Han	Cantonese	Female	196058796	19598.2	97.84	95.77	90.61	85.94	41.09	195746076	99.8405	190119182	97	0.0206464	226.6	42.8	6.29454	0.983823	0.992551	2.91031e-07	3137061	2921375	95625	120061	2.20431	1.489	169	83	45	9235	3117493	5303	37	108	42
00115091015M25BFF2	A	CentralChina	Henan	Han	Mandarin	Female	186272992	18618.8	97.88	96.95	90.6	87.84	41.16	186053006	99.8819	183356292	98.4	0.0253154	234	45.9	5.97919	0.983955	0.958627	0.000308147	3146718	2930298	96485	119935	2.20096	1.48419	161	71	46	9260	3127193	6901	35	96	47
00115091019M18BFF2	A	SouthChina	Guangdong	Han	Min	Female	210582614	21050.8	97.49	97.18	90.95	89.15	41.94	210313020	99.872	205778440	97.7	0.0114225	220.7	41.7	6.74511	0.984724	0.98097	0.000141609	3147957	2932960	95641	119356	2.20286	1.45901	153	75	38	9323	3128405	8449	38	116	45
00115091021M17BFF2	A	SouthChina	Guangdong	Han	Cantonese	Female	207432432	20733	97.56	97.38	91.27	89.87	42.73	206698597	99.6462	201404216	97.1	0.0111941	211.4	40	6.62729	0.983749	0.946649	0.000328258	3138090	2922989	95724	119377	2.20365	1.4741	158	85	45	9308	3118405	6879	38	110	50
00115091023M18BFF2	A	SouthChina	Guangdong	Han	Cantonese	Female	202811046	20272	97.93	95.92	91.14	86.96	42.28	202409856	99.8022	197577738	97.4	0.0129345	228.9	44.9	6.50455	0.983286	0.970278	0.000193076	3148527	2932231	96103	120193	2.20197	1.45771	166	77	50	9408	3128676	6216	37	111	46
00115091030M19BFF2	A	SouthChina	Guangdong	Han	Cantonese	Female	201896088	20180.2	97.94	96.08	91.18	87.38	42.67	201029530	99.5708	196411580	97.3	0.0116637	222.8	43.7	6.46131	0.982495	0.973504	0.0040979	3142278	2927463	95734	119081	2.20046	1.48634	146	77	41	9480	3122455	7924	40	109	52
00115091035M18BFF2	A	EastChina	Jiangxi	Han	Mandarin	Female	215841118	21569.2	97.52	97.2	91.19	89.44	43.78	215501563	99.8427	207646772	96.2	0.0116175	213.2	42.7	6.90378	0.981787	0.92119	8.36397e-08	3133566	2917571	95938	120057	2.20322	1.45334	154	79	42	9405	3113717	9193	41	114	45
00115091039M17BFF2	A	EastChina	Jiangxi	Han	Mandarin	Female	184772376	18469.2	97.31	96.67	90.34	87.78	43.27	183744422	99.4437	179485652	97.1	0.00941377	233.6	46.1	5.89193	0.975256	0.948828	0.00380378	3131134	2916074	95910	119150	2.20301	1.47679	144	84	46	9343	3111389	6455	33	112	47
00115091044M26BFF2	A	SouthChina	Guangdong	Han	Mandarin	Female	214534830	21439.4	97.42	97.48	90.69	90.16	41.17	214243952	99.8644	210842246	98.3	0.0101132	198.8	41.7	6.87483	0.986426	0.990223	0.00105759	3145942	2929144	96127	120671	2.20168	1.45544	154	78	46	9354	3126135	5572	34	106	45
00115091045M16BFF2	A	CentralChina	Hunan	Han	Mandarin	Female	205496834	20539.2	98.28	97.23	92.27	89.52	41.78	204837212	99.679	199634756	97.1	0.0145951	211.7	42.3	6.58538	0.985031	0.971373	0.00023282	3148928	2932547	95896	120485	2.20197	1.45385	144	86	42	9428	3129056	6698	39	112	51
00115091047F00BFF2	A	SouthChina	Guangdong	Han	Cantonese	Male	199798824	19969.2	97.62	95.73	90.63	86.61	40.57	199560925	99.8809	190335766	95.3	0.0200634	213.6	43.3	6.40456	0.990198	0.506263	2.40777e-08	3121959	2905425	95996	120538	2.19849	1.47232	150	74	40	9130	3102726	8160	39	103	48
00115091047M18BFF2	A	SouthChina	Guangdong	Han	Cantonese	Female	242087124	24197.9	98.26	97.31	92.22	89.71	41.45	241513106	99.7629	236151232	97.5	0.01553	209.5	39.4	7.76664	0.987008	0.981382	0.000626843	3172273	2951157	97746	123370	2.20197	1.49203	168	85	41	9479	3152297	5663	41	122	49
00115091056F00BFF2	A	SouthChina	Guangdong	Han	Min	Male	198983920	19886.1	98.18	97.12	91.7	89.05	41.89	198715881	99.8653	194641636	97.8	0.042444	224.4	47	6.38556	0.98891	0.508465	0.000182069	3127865	2910181	96464	121220	2.20006	1.47935	154	82	45	9336	3108144	4805	38	107	49
00115091056M18BFF2	A	SouthChina	Guangdong	Han	Min	Female	220994756	22086.9	97.54	96.86	91.51	89.55	42.66	220521334	99.7858	214302884	97	0.0085799	214.8	42.1	7.07462	0.985621	0.956237	1.18708e-07	3174352	2954257	97355	122740	2.19924	1.47576	153	74	34	9412	3154533	6172	38	97	43
00115091058M18BFF2	A	SouthChina	Guangdong	Han	Cantonese	Female	200181384	20007.9	97.29	96.3	90.73	88.06	43.89	199749253	99.7841	193349244	96.6	0.00698566	227.8	46.1	6.40851	0.971432	0.927271	0.000126426	3134073	2919073	95522	119478	2.20072	1.44966	163	66	49	9426	3114351	7249	38	103	50
00115091060M25BFF2	A	SouthChina	Guangdong	Han	Cantonese	Female	167548064	16749.5	97.77	96.18	90.47	86.02	40.79	167407255	99.916	165187470	98.6	0.0204931	229.1	43.3	5.37438	0.980864	0.972717	0.00257062	3110906	2899045	94399	117462	2.20248	1.47649	146	75	40	9040	3091707	4375	35	102	47
00115091062M17BFF2	A	SouthChina	Guangdong	Han	Cantonese	Female	220935396	22085.8	97.48	96.63	91.27	88.9	41.13	220518175	99.8112	215339746	97.5	0.00667306	220.3	42.6	7.08076	0.987161	0.993479	0.0012031	3163590	2945160	96890	121540	2.20193	1.49073	152	76	41	9432	3143871	5353	41	104	44
00115091068M19BFF2	A	SouthChina	Guangdong	Han	Cantonese	Female	214919850	21479.6	97.47	96	91.27	89.24	41.7	214663759	99.8808	209620706	97.5	0.00717423	219.7	43.3	6.88904	0.986327	0.970314	0.0017861	3148877	2931958	96058	120861	2.20231	1.45834	161	73	50	9264	3129283	6117	35	104	50
00115091070M24BFF2	A	SouthChina	Guangdong	Han	Cantonese	Female	223169218	22308.6	98.1	97.36	91.4	89.53	41.14	222931081	99.8933	219361104	98.3	0.0276516	219.4	41.3	7.17004	0.986648	0.979478	5.38558e-08	3160245	2941276	96962	122007	2.20178	1.47676	155	73	51	9283	3140675	5320	38	94	45
00115091073F00BFF2	A	SouthChina	Guangdong	Han	Cantonese	Male	225560148	22540.2	97.72	95.97	91.02	87.29	40.92	225349706	99.9067	210651884	93.4	0.0218964	208.5	46	7.22299	0.992776	0.505215	0.000456617	3142108	2923319	96845	121944	2.20227	1.49652	168	79	38	9319	3122513	10732	41	119	45
00115091073M17BFF2	A	SouthChina	Guangdong	Han	Cantonese	Female	205242602	20513.1	98.2	96.89	91.96	88.58	43.42	204506659	99.6414	198740704	96.8	0.0137458	216.3	41.3	6.57228	0.980107	0.934872	0.00029865	3156294	2937722	96901	121671	2.2018	1.4836	156	87	47	9322	3136582	6304	44	104	48
00115091075M17BFF2	A	SouthChina	Guangxi	Han	Mandarin	Female	211893142	21178.7	97.38	96.46	91.03	88.54	44.19	210985024	99.5714	204351894	96.4	0.00647234	223.1	43.4	6.76895	0.976892	0.927776	1.27468e-07	3140982	2925802	95842	119338	2.20165	1.4638	152	81	41	9447	3121140	6828	40	109	51
00115091078M25BFF2	A	SouthChina	Guangdong	Han	Cantonese	Female	207076514	20696.2	98.46	96.91	92.78	89.12	40.61	206892806	99.9113	199773590	96.5	0.0156387	218	41.9	6.65233	0.986362	1.00212	5.10554e-07	3145860	2927962	96525	121373	2.19991	1.44579	139	76	45	9080	3126700	6248	39	115	44
00115091083M16BFF2	A	SouthChina	Guangdong	Han	Hakka	Female	209874622	20978.2	97.38	96.38	90.94	88.19	42.91	209332932	99.7419	204313174	97.4	0.00626004	229.7	45.2	6.71937	0.982375	0.954292	0.000252749	3160551	2942407	96638	121506	2.20235	1.47576	157	85	47	9479	3140677	5797	36	108	42
00115091090M24BFF2	A	SouthChina	Guangdong	Han	Unknown	Female	161858624	16180.4	97.65	96.07	89.7	85.19	40.78	161667014	99.8816	159814028	98.7	0.0238183	259	52.1	5.19852	0.979997	0.964262	0.00380563	3127350	2913308	95327	118715	2.20002	1.44806	159	89	41	9192	3107767	4737	36	107	49
00115091095M17BFF2	A	SouthChina	Guangdong	Han	Cantonese	Female	204677178	20451.2	98.22	97.07	92.06	89.13	42.99	204356335	99.8432	197680270	96.6	0.0149393	214	43	6.5603	0.982864	0.928546	0.000870643	3165287	2947565	96711	121011	2.20078	1.48504	158	77	49	9462	3145420	8840	36	97	43
00115091098M19BFF2	A	SouthChina	Guangdong	Han	Cantonese	Female	187358064	18729.3	97.28	96.11	90.61	87.53	43.81	186095665	99.3262	180817568	96.5	0.00676339	235.3	45.8	5.9723	0.975166	0.932088	2.17608e-07	3140211	2925260	95590	119361	2.20311	1.48473	157	77	46	9405	3120465	5119	41	112	47
00115091101M19BFF2	A	SouthChina	Guangdong	Han	Cantonese	Female	222875614	22279.8	97.83	97.99	92.33	91.63	41.52	222573625	99.8645	217458490	97.6	0.0111159	220.3	41.7	7.12716	0.987175	0.955096	1.67023e-05	3151796	2933749	96801	121246	2.20041	1.46305	150	81	47	9248	3132279	5095	38	103	44
00115091103F00BFF2	A	NorthChina	Hebei	Han	Mandarin	Male	194796142	19467	98.52	97.41	92.98	89.92	41.15	194537295	99.8671	188003890	96.5	0.0123987	213.1	41.2	6.25319	0.989603	0.506904	4.13462e-07	3108503	2894501	95013	118989	2.19857	1.49452	153	78	43	9152	3089009	9298	34	108	46
00115091105M18BFF2	A	SouthChina	Guangdong	Han	Cantonese	Female	222849812	22275.4	98.43	97.92	93.12	91.36	42.04	222559400	99.8697	217154656	97.4	0.00651564	218.2	41.1	7.15112	0.986547	0.981373	0.000412493	3151911	2933863	96536	121512	2.19661	1.45421	154	84	45	9484	3132067	6189	43	111	48
00115091108M17BFF2	A	NorthChina	Hebei	Han	Mandarin	Female	212885966	21279	98.2	97.04	91.96	88.94	43.23	212451278	99.7958	207176000	97.3	0.0134426	218.3	42	6.82974	0.980368	0.933058	6.28887e-08	3138271	2921940	95955	120376	2.20138	1.49266	147	83	43	9386	3118438	8828	39	117	45
00115091111M16BFF2	A	SouthChina	Guangdong	Han	Cantonese	Female	193701480	19356.3	98.34	97.47	92.78	90.09	42.9	193177963	99.7297	186389108	96.2	0.0063293	222.2	45.5	6.20147	0.982559	0.936138	0.00112061	3150509	2934452	96014	120043	2.20221	1.46404	144	78	47	9455	3130644	7353	38	117	49
00115091113F00BFF2	A	SouthChina	Guangdong	Han	Cantonese	Male	222403400	22225.7	97.9	96.98	91.19	88.58	41.97	222091993	99.86	217006150	97.6	0.0433868	224.3	48.1	7.12358	0.990578	0.507429	1.65999e-07	3133433	2914883	96797	121753	2.20151	1.48295	145	76	44	9391	3113851	5912	34	119	51
00115091113M24BFF2	A	SouthChina	Guangdong	Han	Cantonese	Female	196386892	19633	97.84	96.84	90.44	87.91	41.11	196194241	99.9019	193449276	98.5	0.0236186	238	45.6	6.30959	0.984916	0.969841	2.3074e-08	3158423	2939080	97149	122194	2.20184	1.47705	174	80	41	9334	3138761	4991	39	104	51
00115091118M17BFF2	A	SouthChina	Guangdong	Han	Cantonese	Female	197003318	19685.8	98.38	97.72	92.95	90.77	42.72	196818388	99.9061	190512296	96.7	0.0078166	224.2	45.8	6.31837	0.98307	0.920773	0.000686606	3143373	2927507	96030	119836	2.20342	1.45356	157	79	42	9471	3123561	9091	35	119	47
00115091121M20BFF2	A	SouthChina	Guangdong	Han	Min	Female	199859114	19979.9	96.9	96.49	90	87.29	41.73	199660527	99.9006	195979492	98.1	0.00983935	236.8	45.2	6.37193	0.98554	0.975356	0.000306783	3137827	2921369	96050	120408	2.20087	1.44421	130	81	49	9408	3118103	4816	49	124	40
00115091125M17BFF2	A	SouthChina	Guangdong	Han	Min	Female	205167128	20510.7	98.33	97.6	92.67	90.3	41.11	204733457	99.7886	200497032	97.7	0.00568979	227.9	43.9	6.58198	0.985828	1.00172	0.00102064	3147531	2930397	96360	120774	2.19997	1.47373	164	76	47	9328	3127916	4771	42	112	46
00115091128M17BFF2	A	SouthChina	Guangdong	Han	Cantonese	Female	219614216	21949.9	98.42	97.95	93.15	91.5	42.19	219338078	99.8743	214347926	97.6	0.00717303	211.2	40.1	7.04725	0.985327	0.971701	3.52324e-07	3172259	2953200	96992	122067	2.19726	1.49027	159	91	44	9391	3152506	5719	38	100	48
00115091131M17BFF2	A	SouthChina	Guangdong	Han	Cantonese	Female	215583466	21543.7	98.39	97.77	93.05	91.02	43.82	214254797	99.3837	208161810	96.6	0.0070671	215.4	40.8	6.88149	0.97567	0.942844	1.4943e-08	3160525	2942785	96767	120973	2.2039	1.51074	162	85	40	9581	3140428	5868	37	116	39
00115091136M22BFF2	A	EastChina	Jiangxi	Han	Mandarin	Female	269385212	26926.2	98.31	97.56	92.45	90.28	42.41	268857297	99.804	262713790	97.5	0.00863074	205.6	39.6	8.64233	0.988085	0.964033	6.79289e-05	3184814	2962765	98302	123747	2.1997	1.49421	165	84	53	9586	3164596	7878	37	115	45
00115091140M23BFF2	A	SouthChina	Guangdong	Han	Cantonese	Female	177881526	17783	98.08	96.57	91.35	87.29	42.02	177359623	99.7066	174350292	98	0.00581208	239.6	47.7	5.70372	0.98224	0.966403	0.00164222	3149681	2932822	96258	120601	2.19953	1.48739	149	81	43	9394	3129786	4461	46	108	44
00115091145M19BFF2	A	SouthChina	Guangdong	Han	Min	Female	238668196	23856.7	98.53	97.27	92.71	89.6	41.61	238410558	99.8921	232060058	97.2	0.0109207	206.6	38.7	7.66246	0.987099	0.975308	0.000368225	3149905	2932678	96358	120869	2.20121	1.4455	141	73	37	9329	3130312	9399	36	107	38
00115091146M19BFF2	A	SouthChina	Guangdong	Han	Cantonese	Female	234544802	23439.9	97.26	97.67	91.37	90.97	41.66	233693367	99.637	227645918	97.1	0.0131619	197	37	7.45805	0.986924	0.974188	3.18166e-08	3155014	2936903	96430	121681	2.20269	1.50076	162	79	39	9438	3135225	5131	41	122	34
00115091149M25BFF2	A	EastChina	Jiangxi	Han	Mandarin	Female	224171558	22407.4	98.18	96.61	91.69	88.13	41.51	224000668	99.9238	220307762	98.3	0.00792278	218	47.2	7.19834	0.986693	0.954221	6.37586e-08	3154698	2935925	96916	121857	2.20202	1.47773	164	77	43	9591	3134624	7003	42	107	46
00115091150F00BFF2	A	SouthChina	Guangdong	Han	Unknown	Male	205585884	20548	98.11	96.72	91.35	88.43	42.94	205351861	99.8862	199961328	97.3	0.041448	217.2	46.6	6.60323	0.981211	0.499404	0.00117161	3116154	2899698	95824	120632	2.20189	1.49007	159	80	39	9283	3096668	5832	35	103	44
00115091150M24BFF2	A	SouthChina	Guangdong	Han	Min	Female	209947794	20987.5	97.99	97.35	91.03	89.05	41	209655851	99.8609	205978394	98.1	0.0270476	218.8	41.5	6.73958	0.98607	0.986477	2.86751e-07	3163139	2942840	97400	122899	2.20083	1.44418	159	84	44	9388	3143507	4714	30	100	44
00115091151F00BFF2	A	SouthChina	Guangdong	Han	Mandarin	Male	211704550	21155.5	97.85	96.69	90.97	87.7	41.64	211493954	99.9005	206765742	97.7	0.0396955	230.8	52	6.78789	0.990485	0.504928	8.36256e-08	3111498	2898013	94886	118599	2.20026	1.46675	156	82	43	9273	3092081	11099	33	105	48
00115091151M17BFF2	A	CentralChina	Hubei	Han	Mandarin	Female	210625604	21054	98.14	96.31	91.59	87.66	40.92	210299820	99.8453	204033974	96.9	0.0222704	205.2	37.8	6.76146	0.985147	1.00519	0.000818678	3143778	2929147	95186	119445	2.20245	1.45887	150	90	38	9305	3124140	10183	42	107	53
00115091154M23BFF2	A	SouthChina	Guangdong	Han	Cantonese	Female	200870044	20074.3	98.39	97.81	92.85	91.18	42.37	200276362	99.7044	194833704	97	0.00759277	194.1	36.6	6.43668	0.983919	0.964278	0.00222667	3134380	2918809	95703	119868	2.19962	1.45714	149	71	44	9299	3114831	5424	34	119	49
00115091156M26BFF2	A	CentralChina	Hubei	Han	Mandarin	Female	221239734	22116.2	98.13	96.67	91.49	88.21	41.27	221038497	99.909	217675014	98.4	0.00773239	220.3	42.4	7.1056	0.987095	0.9677	4.77127e-08	3151430	2932878	96833	121719	2.1987	1.45792	162	83	46	9577	3131418	8016	39	113	49
00115091162M16BFF2	A	SouthChina	Guangdong	Han	Cantonese	Female	214463832	21433	98.33	97.64	92.78	90.58	43.65	214185138	99.8701	207605414	96.8	0.0070545	220.9	44.1	6.87355	0.979573	0.929484	0.00212644	3145412	2929035	96245	120132	2.20646	1.45402	163	85	41	9336	3125835	7750	40	107	47
00115091163F00BFF2	A	SouthChina	Guangdong	Han	Cantonese	Male	216235856	21615.3	98.55	97.49	93.1	90.19	40.72	215973010	99.8784	209232850	96.8	0.0126121	207	38.7	6.94402	0.991912	0.519982	0.00873898	3120506	2905693	95337	119476	2.20008	1.47122	146	77	42	9407	3100847	9814	41	110	42
00115091163M18BFF2	A	SouthChina	Guangdong	Han	Cantonese	Female	205314172	20517.6	98.17	97.9	92.92	91.36	44.33	204197262	99.456	197417498	96.2	0.00812672	207.7	39.7	6.553	0.9746	0.92729	0.0034442	3114407	2902520	94600	117287	2.20696	1.43491	151	79	41	9420	3094607	8161	41	110	46
00115091164M26BFF2	A	SouthChina	Guangdong	Han	Min	Female	207103286	20700	98.42	96.97	92.7	89.32	41.59	206941389	99.9218	196199476	94.7	0.0161318	216.2	42.2	6.64703	0.986576	0.98229	2.04273e-07	3136587	2919291	96380	120916	2.2012	1.42667	150	90	50	9203	3117096	7396	39	115	48
00115091166F00BFF2	A	SouthChina	Guangdong	Han	Cantonese	Male	225365810	22523.6	97.19	97.6	90.59	90.36	41.38	224803565	99.7505	219647362	97.5	0.0106939	216.4	47.1	7.18349	0.992318	0.505339	0.000672712	3132286	2913695	96609	121982	2.19888	1.46604	167	80	46	9199	3112824	5390	32	104	45
00115091166M24BFF2	A	SouthChina	Guangdong	Han	Cantonese	Female	243877694	24377.4	98.2	97.77	91.91	90.93	41.41	243167328	99.7087	238491012	97.8	0.0293462	202	36.7	7.82084	0.987411	0.973637	1.41496e-07	3168680	2947634	97716	123330	2.1987	1.47931	147	84	41	9341	3149076	6107	39	103	48
00115091168M27BFF2	A	EastChina	Jiangxi	Han	Mandarin	Female	175645660	17557.2	97.83	96.34	90.35	86.46	41.28	175452348	99.8899	173107478	98.6	0.0210525	246.5	50.2	5.63684	0.982441	0.955629	0.00188927	3132193	2917588	95650	118955	2.20426	1.47664	164	80	46	9238	3112763	6361	35	114	50
00115091169M23BFF2	A	SouthChina	Guangdong	Han	Min	Female	234267624	23418.2	98.03	97.42	91.22	89.27	40.96	234032362	99.8996	229886054	98.1	0.0298855	216.1	39.9	7.52045	0.987019	0.983349	2.50925e-07	3155115	2935579	97273	122263	2.2016	1.46096	154	76	40	9403	3135422	5304	29	107	43
00115091173F00BFF2	A	SouthChina	Guangdong	Han	Cantonese	Male	214278718	21414.1	97.77	96.5	90.64	87.13	42.12	213941305	99.8425	209373068	97.7	0.0425572	237.8	49.8	6.86979	0.986344	0.510013	1.49755e-07	3142184	2923039	96927	122218	2.2019	1.4879	157	94	42	9383	3122506	5543	40	112	47
00115091173M18BFF2	A	SouthChina	Guangdong	Han	Cantonese	Female	221248338	22114.6	98.12	97.82	92.71	91.07	43.59	219932072	99.4051	213278986	96.4	0.00848367	209.6	40.3	7.05876	0.98166	0.934749	0.00151418	3159335	2939628	97156	122551	2.20269	1.44236	163	78	49	9544	3139419	4735	40	106	49
00115091174F00BFF2	A	SouthChina	Guangdong	Han	Cantonese	Male	202725736	20260.5	98.05	96.49	91.08	87.79	41.66	202245164	99.7629	197862068	97.6	0.0414446	224.5	49	6.49953	0.987657	0.507649	3.5302e-08	3140648	2922179	96753	121716	2.19665	1.48095	141	91	47	9225	3121048	5311	39	102	44
00115091174M20BFF2	A	SouthChina	Guangdong	Han	Cantonese	Female	193843398	19378.8	98.39	97.08	92.47	88.99	41.39	193581382	99.8648	190094948	98.1	0.00973539	234.3	45.3	6.22597	0.985202	0.968153	1.01672e-06	3161353	2941601	97377	122375	2.20114	1.46292	156	89	41	9476	3141473	4859	40	106	43
00115091175M27BFF2	A	CentralChina	Hunan	Han	Xiang	Female	208321518	20825.6	98.41	94.68	92.87	85.92	41.27	207792430	99.746	203663722	97.8	0.0112773	230.9	44.2	6.66885	0.985896	0.940843	0.00039103	3145820	2928704	96171	120945	2.20204	1.45975	157	76	45	9505	3125915	4266	41	108	48
00115091176M22BFF2	A	SouthChina	Guangdong	Han	Mandarin	Female	231442388	23135.8	98.47	97.32	92.81	89.75	41.5	231234968	99.9104	226594064	97.9	0.0117567	224.1	42.2	7.43133	0.987404	0.957347	0.000333441	3163506	2944049	97243	122214	2.20184	1.4802	151	78	49	9382	3143798	6940	38	104	44
00115091180F04BFF2	A	SouthChina	Guangdong	Han	Hakka	Male	200598846	20045	97.78	96.47	90.67	87.12	41.12	200255964	99.8291	194340352	96.9	0.038962	238.1	51.9	6.42931	0.990295	0.51029	0.00113888	3111839	2898867	94958	118014	2.20284	1.46202	156	72	37	9088	3092604	8559	34	97	49
00115091180M16BFF2	A	SouthChina	Guangdong	Han	Hakka	Female	200791696	20067.5	98.1	97.54	92.58	90.27	44.01	199844346	99.5282	192230142	95.7	0.00722999	215.5	42.5	6.41039	0.978531	0.925955	0.000819933	3112880	2901551	94097	117232	2.20634	1.43098	151	91	48	9341	3093248	9482	37	114	48
00115091181F00BFF2	A	SouthChina	Guangdong	Han	Unknown	Male	182572282	18243.6	97.83	96.67	90.98	87.8	43.43	181808869	99.5819	176017574	96.4	0.0433837	226.5	51.8	5.82612	0.957194	0.487108	0.000601347	3117818	2902083	95826	119909	2.20156	1.51276	165	83	43	9334	3098168	5960	39	116	52
00115091181M17BFF2	A	SouthChina	Guangdong	Han	Unknown	Female	185638300	18545	98	97.18	92.26	89.4	45.62	184419305	99.3433	171969292	92.6	0.00867373	221.6	48.9	5.90427	0.958611	0.867476	0.000648735	3141484	2924404	96481	120599	2.20041	1.49488	150	83	49	9409	3121626	12026	41	113	50
00115091184F00BFF2	A	SouthChina	Guangxi	Han	Unknown	Male	220785526	22070.6	97.8	96.6	90.74	87.36	41.23	220525091	99.882	216080918	97.9	0.040969	236.8	51.2	7.08221	0.991377	0.509225	7.82477e-08	3114537	2897187	96159	121191	2.20279	1.45774	158	80	42	9213	3095169	5379	34	107	42
00115091184M19BFF2	A	EastChina	Anhui	Han	Unknown	Female	218851386	21875.3	98.17	97.9	92.84	91.29	41.49	218381058	99.7851	212193904	97	0.00682764	210.1	42	7.01308	0.986059	0.96818	5.77969e-08	3170751	2949793	98001	122957	2.19799	1.46327	153	82	44	9210	3151238	7167	43	110	47
00115091185M21BFF2	A	SouthChina	Guangdong	Han	Cantonese	Female	203421452	20336.7	98.39	97.06	92.44	88.89	41.32	203165376	99.8741	199648250	98.1	0.0104885	235	44.5	6.53226	0.98571	0.974637	1.31043e-07	3135464	2921129	95403	118932	2.2029	1.4365	145	82	41	9256	3115820	7407	40	105	51
00115091186M17BFF2	A	SouthChina	Guangxi	Han	Cantonese	Female	245374544	24524.7	98.24	98.1	93.1	91.85	41.58	244769626	99.7535	237824600	96.9	0.00856847	203.6	37.9	7.86121	0.987524	0.964907	8.90916e-08	3162611	2942724	97303	122584	2.20087	1.4735	149	81	44	9377	3143016	8547	36	104	46
00115091188M27BFF2	A	SouthChina	Guangdong	Han	Cantonese	Female	195251562	19513.8	97.95	96.4	91.16	87.74	41.51	194998092	99.8702	188137080	96.4	0.00549854	212.3	41.8	6.26732	0.984514	0.973186	0.00029075	3137482	2922135	95536	119811	2.20063	1.4636	153	75	37	9323	3117939	6827	37	110	49
00115091189M24BFF2	A	CentralChina	Hubei	Han	Mandarin	Female	213782578	21367.5	98.12	97.41	91.52	89.74	41.17	213544697	99.8887	209760848	98.1	0.0297131	217.4	41.4	6.865	0.986004	0.966092	0.000494034	3160771	2942915	96557	121299	2.20128	1.4919	168	73	39	9378	3140933	7706	37	109	44
00115091190F00BFF2	A	SouthChina	Guangdong	Han	Cantonese	Male	220977774	22087.2	97.64	95.87	90.78	87.01	40.77	220715780	99.8814	210256340	95.1	0.0188764	216.1	43.7	7.08472	0.993202	0.50958	0.00102416	3143882	2924954	96839	122089	2.19794	1.49523	144	79	41	9283	3124359	7194	35	100	45
00115091190M19BFF2	A	SouthChina	Guangdong	Han	Cantonese	Female	208673652	20854.5	98.05	97.49	92.34	89.98	43.56	208422859	99.8798	200140808	95.9	0.0081112	226.1	45.3	6.68142	0.980783	0.910386	8.66853e-07	3144284	2926949	96562	120773	2.20515	1.45265	153	74	46	9489	3124393	8606	34	114	47
00115091196M25BFF2	A	SouthChina	Guangdong	Han	Mandarin	Female	187529344	18747.4	98.16	96.72	91.57	88.36	41	187356141	99.9076	184790860	98.5	0.00659389	222.7	43.1	6.0246	0.984364	0.976877	1.40173e-07	3152390	2935166	96408	120816	2.20207	1.46289	158	77	44	9211	3132751	4637	36	114	45
00115091200M18BFF2	A	SouthChina	Guangdong	Han	Cantonese	Female	223503624	22337.3	98.51	97.12	92.64	89.19	42.06	222696329	99.6388	217139258	97.2	0.00980633	203.8	38.1	7.15501	0.984839	0.984668	0.0017682	3144771	2930004	95575	119192	2.19986	1.47103	159	77	48	9353	3124991	8925	41	113	49
00115091201M19BFF2	A	SouthChina	Guangdong	Han	Hakka	Female	205614040	20552.3	98.43	96.8	92.21	88.19	41.83	205291347	99.8431	200554450	97.5	0.00879474	222.5	43.7	6.60175	0.985072	0.962741	6.10766e-07	3154225	2936923	96382	120920	2.2019	1.49854	151	82	45	9364	3134452	6137	36	107	49
00115091202M17BFF2	A	SouthChina	Guangdong	Han	Cantonese	Female	218423800	21833.8	98.49	97.09	92.52	89.08	41.94	217842210	99.7337	212447140	97.3	0.0080508	207.1	38.5	7.0047	0.984913	0.9801	0.000777128	3158508	2940701	96502	121305	2.20166	1.44273	163	85	40	9444	3138627	4994	38	111	45
00115091204M24BFF2	A	EastChina	Shandong	Han	Mandarin	Female	227290348	22719.2	98.11	97.57	91.49	89.74	40.8	227017599	99.88	223259030	98.2	0.027177	208.9	38.4	7.29582	0.987012	0.98138	0.00159959	3164973	2944968	97088	122917	2.20083	1.49323	160	82	44	9422	3145083	7368	36	109	43
00115091206M26BFF2	A	SouthChina	Guangdong	Han	Cantonese	Female	221379200	22131.5	98.34	97.14	92.58	89.47	41.19	221228846	99.9321	217924092	98.4	0.0116874	225.6	43.4	7.11488	0.986847	0.955246	0.000731646	3164633	2944744	97504	122385	2.19859	1.48163	141	77	43	9480	3144803	5506	39	110	51
00115091208M24BFF2	A	SouthChina	Guangdong	Han	Mandarin	Female	226783656	22671.7	98.47	97.38	92.83	89.94	41.28	226509366	99.8791	222143180	98	0.0112909	223.7	41.8	7.28294	0.987097	0.98278	6.24303e-08	3165976	2946700	97140	122136	2.20363	1.49647	154	80	43	9406	3146058	7930	39	107	56
00115091211M16BFF2	A	SouthChina	Guangdong	Han	Cantonese	Female	192601884	19252.1	98.4	96.76	92.14	88.14	41.83	192391330	99.8907	187816294	97.5	0.00809525	217.9	41.8	6.18532	0.983081	0.973631	8.13416e-08	3143540	2927372	95998	120170	2.20303	1.45093	149	67	49	9281	3123886	5704	43	112	50
00115091216M17BFF2	A	CentralChina	Hunan	Han	Xiang	Female	215977376	21584.5	98.52	97.19	92.73	89.47	42.38	213880833	99.0293	208235408	96.4	0.00977683	203.3	38.4	6.87566	0.98395	0.976524	0.00064262	3143801	2929495	95320	118986	2.20049	1.49667	150	89	48	9222	3124226	9715	38	104	49
00115091222M17BFF2	A	SouthChina	Guangdong	Han	Cantonese	Female	189359046	18926.1	98.48	96.95	92.47	88.78	41.06	189170576	99.9005	183945948	97.1	0.00903484	212.5	42.4	6.08238	0.983564	0.970841	0.00115104	3149748	2933237	95937	120574	2.19855	1.46869	148	83	42	9374	3130118	4810	36	103	54
00115091224M26BFF2	A	EastChina	Jiangxi	Han	Hakka	Female	201552076	20150.4	98.01	96.3	91.04	87.12	40.95	201181037	99.8159	198686154	98.6	0.00656411	234.6	45.6	6.46907	0.985942	0.985444	9.78446e-08	3134980	2918509	96252	120219	2.19846	1.44802	166	80	47	9355	3115357	5800	33	109	47
00115091228M18BFF2	A	SouthChina	Guangdong	Han	Hakka	Female	210128892	21003.9	98.28	97.61	91.94	90.07	41.25	209819614	99.8528	204861054	97.5	0.0172111	199.3	36.4	6.74654	0.985021	0.980379	6.59857e-05	3148270	2931079	96493	120698	2.20173	1.47064	142	83	41	9264	3128797	5368	44	105	38
00115091229M24BFF2	A	SouthChina	Guangdong	Zhuang	Cantonese	Female	219850156	21978.4	98.15	97.22	91.38	89.08	41.08	219525208	99.8522	215042524	97.8	0.0254515	211	38.9	7.05973	0.986643	0.982619	0.000434694	3169543	2949417	97479	122647	2.20264	1.50632	146	93	43	9482	3149624	5078	40	107	47
00115091233M18BFF2	A	SouthChina	Guangdong	Han	Cantonese	Female	223598158	22350.2	98.26	97.44	91.84	89.57	41.39	223368616	99.8973	218130282	97.6	0.0199414	202.5	37.9	7.17612	0.986664	0.961763	0.000142389	3165461	2946137	96991	122333	2.1992	1.45643	159	84	48	9438	3145631	4879	43	104	49
00115091234M20BFF2	A	SouthChina	Guangdong	Han	Cantonese	Female	229856024	22974.5	98.56	97.67	93.32	90.95	41.41	229170940	99.702	223793556	97.4	0.0120699	203.5	37.2	7.36704	0.98703	0.981784	0.000603888	3158802	2939562	96798	122442	2.19775	1.4583	164	75	48	9361	3139116	5056	34	114	42
00115091236M26BFF2	A	SouthChina	Guangdong	Han	Cantonese	Female	220204406	22015.1	98.18	96.59	91.63	87.97	41.02	220028866	99.9203	216540706	98.3	0.00789006	222.1	42.7	7.07499	0.986851	0.978616	0.000152791	3160265	2941538	96797	121930	2.20252	1.48495	172	75	47	9440	3140296	5908	39	116	44
[truncated: 2,649 more rows]
