# Supplementary material for: Whole genome sequencing and analysis of 4,053 individuals in trios and mother-infant duos from the Born in Guangzhou Cohort Study
Source: Research Square preprint supplement (doi:10.21203/rs.3.rs-1732885/v1), 2022-06-10
Supplement: Supplementary file 20 [file 8ad7073e8231f6f123bb1332.xlsx]

## Sheet: Sheet1
Table S11. GWAS SNPs used to calculate the PRS for total bile acid (POS: GRCh38 coordinate; A: Effect allele)
SNP	CHR	POS	A	B	Beta	SE	P value	ALT allele frequency	REF	ALT
rs16923510	chr8	58478278	G	A	0.0779262	0.0111157	2.37531e-12	0.24825	A	G
rs3808609	chr8	58552818	C	G	-0.0783202	0.00995045	3.51759e-15	0.31857	G	C
rs1275679	chr14	69336483	A	G	-0.0766325	0.0158982	1.43415e-06	0.13361	G	A
rs1275691	chr14	69349627	A	G	0.102747	0.0161118	1.8044e-10	0.16307	G	A
rs12879303	chr14	69358768	C	A	0.134414	0.0122608	5.76188e-28	0.17993	A	C
rs34644391	chr14	69372067	T	C	0.222274	0.0157623	3.71139e-45	0.10104	C	T
rs77775838	chr14	69467894	G	A	0.23726	0.0156855	1.09011e-51	0.10464	A	G
