# Supplementary material for: Whole genome sequencing and analysis of 4,053 individuals in trios and mother-infant duos from the Born in Guangzhou Cohort Study
Source: Research Square preprint supplement (doi:10.21203/rs.3.rs-1732885/v1), 2022-06-10
Supplement: Supplementary file 21 [file 97d75772249ac08f58e66aee.xlsx]

## Sheet: Sheet1
Table S3. The new ancestral component enriched in South China
BIGCS population (Unrelated individuals)	Other population	Sample size	P value*
South China (1709)	CHB	103	5.34E-322
	CHS	105	8.66705e-286
	CDX	93	4.56148e-276
	KHV	99	1.05524e-287
	JPT	104	0
	North China in BIGCS	34	4.65611e-104
	Northeast China in BIGCS	49	3.67832e-136
	Norhwest China in BIGCS	41	4.44559e-98
	Central China in BIGCS	232	7.01931e-176
	East China in BIGCS	171	7.20398e-175
	Southwest China in BIGCS	76	2.49053e-66
*The T test p value between South China of BIGCS and EAS and the rest populations of BIGCS of the proportion of new ancestral component
