# Supplementary material for: Whole genome sequencing and analysis of 4,053 individuals in trios and mother-infant duos from the Born in Guangzhou Cohort Study
Source: Research Square preprint supplement (doi:10.21203/rs.3.rs-1732885/v1), 2022-06-10
Supplement: Supplementary file 22 [file a2cc9f6d23c6ce53d7b8773c.xlsx]

## Sheet: Sheet1
Table S10. GWAS SNPs used to calculate the PRS for blood pressure (POS: GRCh38 coordinate; A: Effect allele)
SNP	CHR	POS	A	B	Beta	SE	P value	ALT allele frequency	REF	ALT
rs260508	chr1	2255646	G	T	-0.10755	0.0382	0.004871	0.3817	T	G
rs2493292	chr1	3412095	T	C	0.218	0.05405	5.5e-05	0.166	C	T
rs709209	chr1	6218354	G	A	-0.0332	0.0418	0.427045	0.3469	A	G
rs4908678	chr1	7679190	C	T	0.1134	0.03845	0.003185	0.3519	T	C
rs2252865	chr1	8362616	C	T	-0.1283	0.0376	0.000644	0.6819	T	C
rs9662255	chr1	9381890	A	C	-0.10195	0.03825	0.007691	0.3867	C	A
rs880315	chr1	10736809	C	T	0.3871	0.0396	1.44e-22	0.3569	T	C
rs17367504	chr1	11802721	G	A	-0.62445	0.0508	9.96e-35	0.1392	A	G
rs3820068	chr1	15471702	G	A	-0.232	0.04725	9.11e-07	0.173	A	G
rs2807337	chr1	22250878	C	T	-0.1069	0.03665	0.003537	0.5994	T	C
rs150266910	chr1	23115772	T	C	0.0077	0.0476	0.871491	0.1759	C	T
rs6686889	chr1	24703979	T	C	0.1002	0.04215	0.017443	0.2664	C	T
rs79598313	chr1	26958422	T	C	0.324	0.11805	0.006058	0.0249	C	T
rs3737801	chr1	27634321	G	C	-0.3311	0.0758	1.25e-05	0.0934	C	G
rs1565716	chr1	29222704	A	G	0.2371	0.07255	0.001083	0.0626	G	A
rs4652875	chr1	33402868	G	C	-0.02525	0.0381	0.507504	0.5447	C	G
rs9729719	chr1	37832535	A	G	0.03355	0.04205	0.424952	0.2823	G	A
rs11210029	chr1	41399621	G	A	0.1271	0.03785	0.000785	0.3549	A	G
rs7515635	chr1	41942399	C	T	-0.1736	0.0368	2.39e-06	0.5288	T	C
rs72659998	chr1	42571885	T	C	-0.0251	0.0493	0.610663	0.162	C	T
rs839755	chr1	43390739	C	A	0.1145	0.0376	0.002325	0.3718	A	C
rs512083	chr1	45561683	C	T	0.02725	0.0363	0.45284	0.4771	T	C
rs12142296	chr1	46076007	G	T	0.19985	0.0548	0.000265	0.1292	T	G
rs4926923	chr1	47643553	C	T	-0.1728	0.0663	0.009152	0.0865	T	C
rs11579440	chr1	48586751	C	T	-0.217	0.0518	2.8e-05	0.1561	T	C
rs112557609	chr1	56111252	A	G	0.16065	0.0388	3.47e-05	0.337	G	A
rs2404715	chr1	56543106	T	C	-0.09905	0.0633	0.117637	0.1173	C	T
rs60199046	chr1	59197669	G	A	-0.0512	0.0402	0.203	0.2396	A	G
rs20354	chr1	66605673	T	G	0.10605	0.05305	0.045602	0.1501	G	T
rs34517439	chr1	77984833	A	C	-0.0739	0.06365	0.245627	0.0915	C	A
rs12034319	chr1	85574424	A	G	0.05785	0.0445	0.193601	0.2097	G	A
rs385437	chr1	86356548	G	A	-0.0997	0.05025	0.047247	0.171	A	G
rs10923038	chr1	88186088	A	C	0.09495	0.0382	0.012933	0.6173	C	A
rs2065152	chr1	89762960	T	C	0.16145	0.03795	2.1e-05	0.3211	C	T
rs17516329	chr1	91854224	T	A	-0.00745	0.0397	0.851145	0.3161	A	T
rs7514579	chr1	93585793	C	A	-0.09215	0.04335	0.0335	0.2137	A	C
rs17396055	chr1	94265398	A	G	-0.1177	0.04	0.00326	0.3579	G	A
rs17030613	chr1	112648185	C	A	0.3141	0.0445	1.68e-12	0.2346	A	C
rs2932538	chr1	112673921	G	A	0.29025	0.0419	4.29e-12	0.7555	A	G
rs12078697	chr1	116472496	C	G	-0.1116	0.04475	0.012636	0.2087	G	C
rs7553422	chr1	118998096	C	T	0.12175	0.0371	0.00103	0.5915	T	C
rs11585169	chr1	150599561	A	T	0.1268	0.0377	0.00077	0.5547	T	A
rs13796	chr1	154273441	C	T	0.1215	0.0559	0.029741	0.1193	T	C
rs76719272	chr1	156160005	T	C	-0.10615	0.05635	0.059597	0.1093	C	T
rs2171690	chr1	164770862	C	T	-0.14405	0.03665	8.48e-05	0.4742	T	C
rs7524019	chr1	167397956	T	C	0.11225	0.03705	0.002448	0.4861	C	T
rs2157597	chr1	169232329	T	C	-0.0411	0.0389	0.290715	0.341	C	T
rs12118102	chr1	176665588	G	A	-0.1526	0.0813	0.060518	0.0686	A	G
rs150816167	chr1	179602727	C	T	0.141	0.0987	0.153	0.0537	T	C
rs10913934	chr1	180162505	T	G	0.05235	0.03805	0.168877	0.5785	G	T
rs1043069	chr1	180890232	G	T	-0.0866	0.03865	0.025051	0.3857	T	G
rs41475048	chr1	183089317	G	A	0.10065	0.0436	0.021	0.2863	A	G
rs4651224	chr1	184616048	T	C	0.15685	0.0375	2.88e-05	0.4632	C	T
rs12042924	chr1	197328287	C	T	0.07185	0.037	0.05215	0.4761	T	C
rs882624	chr1	201766785	T	C	-0.06535	0.03965	0.099317	0.3479	C	T
rs33996239	chr1	203140673	T	C	-0.2463	0.0876	0.004929	0.0537	C	T
rs4245739	chr1	204549714	A	C	0.1533	0.0417	0.000237	0.7396	C	A
rs2629665	chr1	207047455	A	C	-0.16245	0.0378	1.73e-05	0.4205	C	A
rs2761436	chr1	207746403	T	C	0.1119	0.0366	0.002233	0.5288	C	T
rs7555285	chr1	209797010	C	G	0.09765	0.0447	0.028921	0.7833	G	C
rs12408022	chr1	217545447	T	C	0.19985	0.04225	2.24e-06	0.2694	C	T
rs35981664	chr1	218376012	T	A	0.1328	0.04095	0.001183	0.2952	A	T
rs2820443	chr1	219580167	C	T	-0.12945	0.0396	0.00108	0.2863	T	C
rs9431431	chr1	221185454	A	G	-0.13955	0.0402	0.000518	0.2913	G	A
rs73091767	chr1	227063074	C	T	0.089	0.041	0.029951	0.2624	T	C
rs2004776	chr1	230712956	T	C	0.2862	0.04305	2.97e-11	0.2256	C	T
rs6429422	chr1	243309499	G	T	0.16765	0.0391	1.81e-05	0.34	T	G
rs2175337	chr2	9158461	A	C	0.022	0.0374	0.556374	0.6262	C	A
rs67720684	chr2	18794173	A	C	0.1459	0.04435	0.001003	0.2465	C	A
rs1344653	chr2	19531084	G	A	0.0444	0.0362	0.220003	0.495	A	G
rs7255	chr2	20679060	C	T	-0.00225	0.03725	0.952	0.5298	T	C
rs66774912	chr2	21200660	A	G	-0.0608	0.0536	0.257	0.17	G	A
rs10779936	chr2	23727330	A	G	-0.04595	0.04015	0.252434	0.7078	G	A
rs55701159	chr2	24916727	G	T	-0.22325	0.05885	0.000149	0.1034	T	G
rs1275988	chr2	26691496	T	C	-0.39745	0.037	6.47e-27	0.5885	C	T
rs7562	chr2	28412873	C	T	-0.11935	0.0373	0.001376	0.4602	T	C
rs1607644	chr2	34454559	A	G	-0.1306	0.037	0.000416	0.3847	G	A
rs13420463	chr2	37290423	G	A	-0.2012	0.04405	4.93e-06	0.2624	A	G
rs4952611	chr2	40340603	T	C	-0.17385	0.03865	6.86e-06	0.5527	C	T
rs11681462	chr2	42125427	C	A	0.15315	0.0463	0.00094	0.1899	A	C
rs76326501	chr2	42940738	C	A	-0.45555	0.0658	4.41e-12	0.0845	A	C
rs35590893	chr2	43489794	A	G	-0.11505	0.0413	0.005341	0.2744	G	A
rs11690961	chr2	46136197	C	A	0.07135	0.0573	0.213058	0.1193	A	C
rs6545155	chr2	50202723	C	T	-0.1071	0.04365	0.0141	0.2058	T	C
rs10189186	chr2	52798619	G	A	-0.12525	0.03645	0.00059	0.4622	A	G
rs2920899	chr2	55052545	T	G	0.1128	0.04575	0.0137	0.8022	G	T
rs1975487	chr2	55581918	G	A	0.19715	0.03745	1.41e-07	0.5189	A	G
rs72816333	chr2	59869425	T	A	-0.1568	0.0476	0.000987	0.1849	A	T
rs925484	chr2	60384302	G	C	0.0775	0.03755	0.039026	0.4175	C	G
rs7608483	chr2	61609100	C	A	-0.1334	0.03735	0.000355	0.6203	A	C
rs13014371	chr2	63990652	C	T	0.1344	0.03685	0.000265	0.4026	T	C
rs2631669	chr2	65877747	C	T	0.04665	0.03605	0.195653	0.5328	T	C
rs2300481	chr2	66555335	T	C	0.13185	0.037	0.000366	0.3877	C	T
rs6731373	chr2	68275912	A	G	0.09275	0.03995	0.0203	0.2992	G	A
rs12052761	chr2	68838709	A	G	-0.12665	0.0377	0.000781	0.3926	G	A
rs3771371	chr2	71400409	T	C	-0.1249	0.03685	0.0007	0.5527	C	T
rs10193543	chr2	72256200	G	T	-0.24275	0.05025	1.36e-06	0.1511	T	G
rs1876487	chr2	72887223	C	A	0.0965	0.0432	0.025496	0.7038	A	C
rs11689667	chr2	85264242	C	T	-0.04205	0.03695	0.25511	0.4274	T	C
rs72847885	chr2	86099594	G	A	-0.12315	0.03915	0.001658	0.3628	A	G
rs2579519	chr2	96009418	C	T	0.07765	0.0384	0.043162	0.3539	T	C
rs4851462	chr2	97740700	C	T	0.04995	0.03785	0.186941	0.3748	T	C
rs150194832	chr2	105510423	C	G	-0.16925	0.06355	0.007739	0.0885	G	C
rs28377357	chr2	112012144	A	G	-0.08445	0.0393	0.031646	0.3012	G	A
rs62158170	chr2	113324598	G	A	-0.23875	0.04475	9.54e-08	0.2097	A	G
rs6723509	chr2	121243169	C	T	-0.1532	0.051	0.002665	0.1471	T	C
rs13001283	chr2	126425877	A	G	0.1358	0.0489	0.005485	0.16	G	A
rs4954192	chr2	134875411	T	C	-0.14865	0.03825	0.000102	0.5129	C	T
rs72844590	chr2	137663657	T	G	0.1036	0.0542	0.055948	0.1491	G	T
rs7606205	chr2	143388742	C	A	0.1186	0.03985	0.002919	0.2833	A	C
rs1438896	chr2	144888505	C	T	-0.20935	0.0397	1.34e-07	0.7207	T	C
rs34570306	chr2	145515292	T	C	-0.1107	0.0375	0.003157	0.5596	C	T
rs62169544	chr2	146193340	A	G	-0.12095	0.037	0.00108	0.4264	G	A
rs12990959	chr2	147814591	C	T	0.12825	0.03955	0.001184	0.33	T	C
rs4664080	chr2	152121827	A	G	-0.02745	0.0378	0.467722	0.4026	G	A
rs3175	chr2	152762259	A	G	0.1007	0.0398	0.011401	0.6312	G	A
rs1220128	chr2	157643390	C	G	0.1699	0.05105	0.000874	0.8479	G	C
rs79523138	chr2	160511702	G	A	0.1777	0.0633	0.004996	0.1262	A	G
rs55732192	chr2	161421722	T	G	-0.20155	0.0634	0.00148	0.1004	G	T
rs1446468	chr2	164106976	C	T	0.37475	0.03715	6.28e-24	0.5119	T	C
rs6712203	chr2	164700808	T	C	-0.154	0.0379	4.84e-05	0.4185	C	T
rs2390258	chr2	165393619	A	G	-0.11345	0.03885	0.003498	0.2793	G	A
rs560887	chr2	168906638	C	T	0.0209	0.0391	0.592977	0.7008	T	C
rs151054210	chr2	171524977	A	G	-0.00395	0.04715	0.933235	0.1918	G	A
rs6758859	chr2	173100328	C	T	-0.07305	0.03785	0.053608	0.3897	T	C
rs11694601	chr2	174084630	G	A	0.112	0.03735	0.002712	0.4274	A	G
rs72914576	chr2	174665239	G	C	0.1059	0.04525	0.019267	0.2316	C	G
rs60148403	chr2	177124686	A	T	0.0276	0.04625	0.551	0.2078	T	A
rs1837164	chr2	177851874	T	A	-0.1247	0.0375	0.000883	0.6262	A	T
rs79146658	chr2	178921341	C	T	0.1432	0.06825	0.03589	0.1004	T	C
rs1486236	chr2	179874723	A	C	-0.0507	0.03855	0.188451	0.341	C	A
rs10184839	chr2	181081388	T	A	0.14965	0.04075	0.00024	0.7127	A	T
rs16823124	chr2	182359400	A	G	0.20615	0.03945	1.74e-07	0.2763	G	A
rs12473688	chr2	184168743	G	A	-0.09455	0.04025	0.01882	0.672	A	G
rs28558491	chr2	186951594	T	C	-0.09845	0.041	0.016341	0.6899	C	T
rs11901929	chr2	188778589	G	A	-0.04405	0.0389	0.25747	0.6511	A	G
rs296797	chr2	200238182	C	T	-0.1348	0.0371	0.00028	0.5805	T	C
rs1469760	chr2	203260703	C	T	0.06735	0.0368	0.067226	0.4175	T	C
rs2162003	chr2	204212405	C	T	-0.1327	0.0402	0.000963	0.3847	T	C
rs1263671	chr2	207131723	C	T	0.14955	0.05125	0.003522	0.1531	T	C
rs1047891	chr2	210675783	A	C	-0.13375	0.0406	0.000987	0.3012	C	A
rs12694277	chr2	212324070	C	T	0.0984	0.04	0.013894	0.7276	T	C
rs4674114	chr2	216794543	G	A	0.0844	0.0455	0.063604	0.7952	A	G
rs1063281	chr2	217804009	T	C	-0.1885	0.0383	8.58e-07	0.5855	C	T
rs1996992	chr2	218786626	T	G	-0.21225	0.083	0.0106	0.0477	G	T
rs2972146	chr2	226235982	T	G	0.19405	0.03785	2.95e-07	0.6252	G	T
rs1044822	chr2	229764422	T	C	-0.13865	0.0527	0.008515	0.1531	C	T
rs12052878	chr2	237318951	A	G	-0.0233	0.0383	0.542952	0.327	G	A
rs4507125	chr2	238943036	C	A	0.1232	0.044	0.00511	0.2068	A	C
rs347591	chr3	11248436	T	G	0.2157	0.03885	2.82e-08	0.6372	G	T
rs729639	chr3	13785357	C	T	0.00825	0.0383	0.829452	0.6193	T	C
rs11128722	chr3	14916619	A	G	-0.18535	0.0374	7.2e-07	0.5487	G	A
rs4634143	chr3	23122258	C	T	-0.08835	0.0406	0.0295	0.659	T	C
rs13082711	chr3	27496418	C	T	0.232	0.0433	8.42e-08	0.2147	T	C
rs72851229	chr3	29332728	C	G	-0.129	0.049	0.00847	0.171	G	C
rs12638085	chr3	30364444	A	T	0.1451	0.04145	0.000464	0.341	T	A
rs267517	chr3	37497599	A	G	-0.04225	0.0364	0.245758	0.5457	G	A
rs6801957	chr3	38725824	C	T	0.01175	0.0362	0.745495	0.5845	T	C
rs6788984	chr3	41065682	G	A	-0.1034	0.05285	0.050409	0.1451	A	G
rs9815354	chr3	41871159	A	G	0.1318	0.05	0.008389	0.1839	G	A
rs6797587	chr3	48156124	G	A	0.25045	0.0393	1.86e-10	0.6859	A	G
rs73082337	chr3	48972137	G	C	-0.1253	0.0577	0.029888	0.1203	C	G
rs36022378	chr3	49876272	C	T	0.13525	0.04765	0.00453	0.1978	T	C
rs13303	chr3	52523992	C	T	0.0624	0.03755	0.096556	0.5656	T	C
rs9810888	chr3	53601568	G	T	0.13935	0.03685	0.000156	0.4891	T	G
rs9827472	chr3	56692618	T	C	-0.15325	0.0385	6.88e-05	0.341	C	T
rs12486605	chr3	57720776	C	T	0.0749	0.03645	0.039892	0.4592	T	C
rs3774702	chr3	63871194	A	G	0.1336	0.0488	0.006187	0.1799	G	A
rs918466	chr3	64724577	A	G	-0.1512	0.0379	6.62e-05	0.4245	G	A
rs7630745	chr3	66376605	C	T	-0.07045	0.03795	0.063398	0.3638	T	C
rs4499560	chr3	70871334	T	A	0.11095	0.03955	0.005027	0.6859	A	T
rs729448	chr3	73211394	A	G	-0.037	0.03695	0.316656	0.5278	G	A
rs1375564	chr3	85607161	T	C	0.11625	0.03805	0.002249	0.6392	C	T
rs9860290	chr3	100120262	A	G	-0.0828	0.04585	0.070936	0.1769	G	A
rs11923667	chr3	101549236	A	T	0.1056	0.03645	0.00377	0.4085	T	A
rs28675079	chr3	111781155	A	G	-0.2127	0.04635	4.45e-06	0.1938	G	A
rs1882289	chr3	114742361	A	G	-0.18495	0.05545	0.000852	0.8837	G	A
rs6806529	chr3	123331091	C	A	-0.13505	0.03785	0.00036	0.6083	A	C
rs6438857	chr3	124838796	C	T	-0.0533	0.037	0.149715	0.4284	T	C
rs9875380	chr3	133061512	T	C	-0.10595	0.03645	0.00365	0.4443	C	T
rs6783086	chr3	134240708	T	C	0.2015	0.03715	5.83e-08	0.4274	C	T
rs590198	chr3	136234887	A	G	0.0828	0.0365	0.023299	0.5656	G	A
rs2306374	chr3	138401110	C	T	0.19835	0.0499	7.04e-05	0.1451	T	C
rs16851397	chr3	141415976	G	A	0.49535	0.08995	3.65e-08	0.0457	A	G
rs62278541	chr3	142913067	G	A	-0.0386	0.0382	0.31227	0.3807	A	G
rs6772704	chr3	149806905	C	A	0.05595	0.04335	0.196822	0.3141	A	C
rs9833313	chr3	157859002	T	A	0.01585	0.04335	0.714642	0.7545	A	T
rs78151625	chr3	158598937	C	T	0.1017	0.04865	0.036578	0.1571	T	C
rs419076	chr3	169383098	C	T	-0.32235	0.0363	6.68e-19	0.5179	T	C
rs4894535	chr3	172277815	T	C	0.0558	0.0501	0.265	0.1541	C	T
rs73171158	chr3	177210161	C	T	0.1474	0.0396	0.000197	0.5477	T	C
rs7611674	chr3	179451442	G	T	-0.1424	0.0476	0.002775	0.175	T	G
rs262986	chr3	183717925	A	G	-0.14805	0.03715	6.74e-05	0.5199	G	A
rs12374077	chr3	185599886	C	G	0.14775	0.03845	0.000122	0.3231	G	C
rs1706003	chr3	194579238	T	G	0.1268	0.03715	0.000642	0.4861	G	T
rs6777317	chr3	197344088	A	G	0.12485	0.039	0.00137	0.2893	G	A
rs1250129	chr4	1261142	G	A	0.07885	0.05815	0.175107	0.8936	A	G
rs55829085	chr4	2163766	C	A	0.2225	0.08985	0.0133	0.0497	A	C
rs231708	chr4	2693046	C	G	-0.0797	0.0389	0.0405	0.6958	G	C
rs2498323	chr4	3449382	A	G	0.0345	0.06105	0.571999	0.0815	G	A
rs3822239	chr4	10093915	A	T	0.00865	0.03965	0.827305	0.7167	T	A
rs13122790	chr4	15355171	G	A	-0.0081	0.04205	0.84725	0.2744	A	G
rs11730129	chr4	16031325	C	T	0.09755	0.04455	0.028548	0.7952	T	C
rs2610990	chr4	18006609	G	A	0.104	0.04195	0.01317	0.7127	A	G
rs28667801	chr4	26783734	T	A	0.1216	0.03765	0.001239	0.4304	A	T
rs1878825	chr4	36089748	G	C	0.0969	0.0387	0.0123	0.3907	C	G
rs2291435	chr4	38385774	T	C	-0.1884	0.03675	2.95e-07	0.5437	C	T
rs12511987	chr4	46593606	G	T	0.13465	0.04765	0.004716	0.161	T	G
rs871606	chr4	53933078	C	T	-0.1351	0.0604	0.025302	0.1372	T	C
rs1718845	chr4	57076987	G	A	0.0519	0.03925	0.186	0.7018	A	G
rs6551716	chr4	62709978	A	T	0.2221	0.0542	4.17e-05	0.8479	T	A
rs10008637	chr4	76492991	C	T	-0.11635	0.03595	0.00121	0.4453	T	C
rs1458038	chr4	80243569	T	C	0.53595	0.04025	1.88e-40	0.2694	C	T
rs6823199	chr4	83004742	C	T	-0.15005	0.0436	0.000578	0.2614	T	C
rs2014912	chr4	85794517	C	T	-0.3307	0.05115	1.01e-10	0.8459	T	C
rs13149209	chr4	88829517	C	T	-0.125	0.04295	0.00361	0.2416	T	C
rs7694000	chr4	94403817	T	A	0.0622	0.0368	0.090986	0.495	A	T
rs1347345	chr4	95017235	A	G	-0.1459	0.0375	0.0001	0.6402	G	A
rs223361	chr4	102848147	C	T	-0.0256	0.0395	0.516919	0.332	T	C
rs4699165	chr4	105188224	G	A	-0.0187	0.03835	0.625823	0.664	A	G
rs13112725	chr4	105990585	C	G	0.3057	0.04425	4.9e-12	0.7724	G	C
rs7694643	chr4	108096372	A	G	-0.1352	0.03745	0.000306	0.6491	G	A
rs6825911	chr4	110460482	T	C	-0.2044	0.0458	8.09e-06	0.7833	C	T
rs4834735	chr4	119037654	C	T	-0.14835	0.05365	0.00569	0.8688	T	C
rs66887589	chr4	119588124	C	T	0.15315	0.03675	3.08e-05	0.4891	T	C
rs3097937	chr4	123873489	T	A	-0.1866	0.0466	6.22e-05	0.2008	A	T
rs7439567	chr4	137543688	T	C	0.1607	0.0374	1.73e-05	0.4085	C	T
rs72719160	chr4	143130123	T	A	0.19325	0.03845	5.01e-07	0.3221	A	T
rs4292285	chr4	144350802	A	T	-0.1141	0.0372	0.002161	0.4036	T	A
rs4835266	chr4	145900573	C	T	-0.01785	0.03855	0.643	0.4622	T	C
rs10305838	chr4	147479104	C	T	0.04815	0.0526	0.359982	0.1461	T	C
rs6823767	chr4	150373933	C	T	0.12025	0.0419	0.00411	0.2594	T	C
rs13139571	chr4	155724361	A	C	-0.2633	0.0427	6.99e-10	0.2584	C	A
rs17035181	chr4	156757359	G	T	-0.198	0.05135	0.000115	0.16	T	G
rs869396	chr4	168766849	A	C	-0.0941	0.037	0.011	0.4712	C	A
rs10069690	chr5	1279675	T	C	0.16655	0.04055	4e-05	0.2763	C	T
rs954767	chr5	3705936	C	A	0.1364	0.04025	0.000702	0.2783	A	C
rs1173771	chr5	32814922	G	A	0.39045	0.0372	9.01e-26	0.5805	A	G
rs74774746	chr5	33411663	C	G	-0.08845	0.0423	0.0365	0.2843	G	C
rs6867399	chr5	52839709	A	C	0.01245	0.0469	0.790656	0.2565	C	A
rs1694068	chr5	53987800	A	T	0.14095	0.03695	0.000136	0.6282	T	A
rs13179413	chr5	56572270	T	C	0.1433	0.04265	0.00078	0.2853	C	T
rs12515541	chr5	57799184	T	G	0.1557	0.03735	3.06e-05	0.6024	G	T
rs1848510	chr5	58458178	A	G	0.09325	0.0386	0.0157	0.3787	G	A
rs10062049	chr5	62258054	T	C	0.1835	0.0529	0.000523	0.1312	C	T
rs6875372	chr5	64783188	A	T	0.1479	0.03645	4.96e-05	0.5288	T	A
rs3121685	chr5	66366305	T	C	-0.0947	0.03655	0.009571	0.4831	C	T
rs4286632	chr5	66995542	G	A	-0.1514	0.0408	0.000207	0.2515	A	G
rs246973	chr5	68711976	T	C	0.12585	0.0432	0.003578	0.2942	C	T
rs72761109	chr5	72210702	T	C	0.0329	0.04105	0.422864	0.3111	C	T
rs4443403	chr5	73358477	C	T	0.10055	0.05945	0.0908	0.0974	T	C
rs10078021	chr5	75742606	G	T	0.09185	0.03885	0.018068	0.3797	T	G
rs10057188	chr5	78541966	A	G	-0.13065	0.03775	0.000538	0.4811	G	A
rs10059921	chr5	88218698	T	G	-0.2961	0.07305	5.05e-05	0.0875	G	T
rs62380354	chr5	90189094	C	A	-0.20825	0.06585	0.00156	0.0905	A	C
rs709668	chr5	96838483	G	A	0.15265	0.0454	0.000773	0.7982	A	G
rs1871190	chr5	98618015	T	G	0.136	0.0393	0.000539	0.3419	G	T
rs286809	chr5	108122936	A	G	-0.0991	0.04875	0.042071	0.1799	G	A
rs79409628	chr5	108778039	T	G	-0.08465	0.0644	0.188698	0.0905	G	T
rs1432457	chr5	120445874	G	A	0.09635	0.03995	0.015876	0.2843	A	G
rs13359291	chr5	123140763	A	G	0.28095	0.0493	1.21e-08	0.17	G	A
rs6891344	chr5	123800962	G	A	-0.2511	0.04765	1.37e-07	0.1879	A	G
rs62373688	chr5	128017115	A	T	0.1748	0.05925	0.00318	0.1034	T	A
rs6595838	chr5	128532506	A	G	0.17885	0.0402	8.63e-06	0.2823	G	A
rs12521868	chr5	132448701	T	G	-0.13465	0.0378	0.000368	0.3867	G	T
rs2400509	chr5	148316455	A	G	-0.05375	0.0416	0.196	0.2525	G	A
rs9687065	chr5	149011577	G	A	-0.2145	0.0469	4.8e-06	0.1769	A	G
rs157678	chr5	156718643	A	T	-0.101	0.0408	0.013305	0.6829	T	A
rs62385385	chr5	158940241	A	T	0.15565	0.0373	3.01e-05	0.3628	T	A
rs28362590	chr5	177304451	T	G	0.11285	0.0435	0.00948	0.7853	G	T
rs12153395	chr5	179984477	A	G	-0.17215	0.06065	0.004534	0.0924	G	A
rs2745599	chr6	1613451	G	A	-0.1007	0.0362	0.005406	0.4394	A	G
rs1334576	chr6	7211585	A	G	-0.015	0.03605	0.677345	0.4076	G	A
rs9392172	chr6	7723729	G	C	0.02865	0.0357	0.422	0.4523	C	G
rs114275780	chr6	8224415	A	T	0.05725	0.08605	0.505852	0.0507	T	A
rs1630736	chr6	12295754	T	C	-0.11235	0.0364	0.002025	0.4612	C	T
rs9349379	chr6	12903725	G	A	-0.16755	0.0385	1.35e-05	0.4006	A	G
rs12216497	chr6	19028392	T	C	0.06205	0.03665	0.090447	0.5577	C	T
rs9368222	chr6	20686765	A	C	0.13925	0.04	0.000499	0.2803	C	A
rs6911827	chr6	22130372	T	C	0.136	0.0376	0.000298	0.4602	C	T
rs1799945	chr6	26090951	G	C	0.46115	0.0522	1.01e-18	0.172	C	G
rs409558	chr6	31740370	C	T	-0.29015	0.0507	1.05e-08	0.1839	T	C
rs115245297	chr6	34276355	C	T	0.4152	0.09635	1.64e-05	0.0288	T	C
rs3176336	chr6	36681039	T	A	-0.01245	0.0366	0.733733	0.3917	A	T
rs4714224	chr6	39218967	C	G	-0.13175	0.0449	0.00334	0.2972	G	C
rs1563788	chr6	43340625	T	C	0.21815	0.0398	4.23e-08	0.333	C	T
rs9472135	chr6	43842065	C	T	-0.061	0.0394	0.121569	0.3032	T	C
rs78648104	chr6	50715296	C	T	0.26975	0.066	4.37e-05	0.1173	T	C
rs13205180	chr6	51967696	T	C	0.08025	0.03685	0.029425	0.4692	C	T
rs631441	chr6	54129828	G	T	-0.00375	0.0389	0.923	0.2704	T	G
rs1925153	chr6	56237982	T	C	0.01065	0.039	0.784794	0.4324	C	T
rs504691	chr6	71496917	A	C	-0.04575	0.03735	0.221	0.4056	C	A
rs12195276	chr6	72947991	T	C	-0.08645	0.0408	0.034101	0.7445	C	T
rs10943605	chr6	78945760	A	G	0.16495	0.0367	6.97e-06	0.4791	G	A
rs7753695	chr6	80108814	T	C	0.1078	0.0378	0.004347	0.4632	C	T
rs9449350	chr6	81571700	C	T	0.18395	0.03875	2.06e-06	0.3241	T	C
rs60255247	chr6	84573535	C	A	-0.0157	0.0601	0.793914	0.1143	A	C
rs35410524	chr6	96437529	T	C	0.22055	0.04675	2.39e-06	0.2058	C	T
rs9486916	chr6	108692727	T	C	0.1616	0.04605	0.000449	0.2296	C	T
rs3822857	chr6	115992768	C	G	-0.0785	0.0383	0.040403	0.3499	G	C
rs2693560	chr6	117202508	G	A	0.16845	0.03885	1.45e-05	0.6511	A	G
rs2498586	chr6	117704963	T	C	-0.1268	0.0492	0.00996	0.2157	C	T
rs9372498	chr6	118251323	A	T	0.2771	0.06595	2.65e-05	0.0915	T	A
rs9401090	chr6	118792154	C	T	-0.1302	0.0428	0.00235	0.2366	T	C
rs11154027	chr6	121460244	C	T	0.03725	0.0377	0.323121	0.5159	T	C
rs6925750	chr6	121966844	C	T	0.0095	0.05515	0.863	0.1203	T	C
rs10782230	chr6	125907366	A	G	0.1162	0.0368	0.00159	0.495	G	A
rs13209747	chr6	126794309	T	C	0.33295	0.037	2.29e-19	0.4513	C	T
rs9885632	chr6	130990769	T	C	0.09215	0.04215	0.028798	0.7326	C	T
rs4896104	chr6	134797951	T	C	-0.01965	0.0375	0.600279	0.5785	C	T
rs668459	chr6	139514552	T	C	-0.1422	0.0363	8.95e-05	0.5726	C	T
rs7763294	chr6	140062596	G	T	0.0939	0.03895	0.015918	0.6918	T	G
rs6941056	chr6	143270684	G	C	-0.05755	0.03625	0.112	0.4563	C	G
rs7765526	chr6	147392628	G	A	-0.1784	0.03735	1.78e-06	0.5189	A	G
rs17080102	chr6	150683634	C	G	-0.6119	0.0728	4.27e-17	0.0696	G	C
rs9479200	chr6	152077370	G	A	-0.02545	0.05635	0.651527	0.1093	A	G
rs9479509	chr6	153106130	A	G	-0.10975	0.0395	0.005461	0.3032	G	A
rs598682	chr6	154097624	G	A	0.1474	0.04125	0.000352	0.7734	A	G
rs449789	chr6	159278093	G	C	-0.0631	0.0539	0.242	0.8827	C	G
rs555754	chr6	160348391	A	G	-0.12	0.03645	0.000994	0.4761	G	A
rs9456648	chr6	161291203	T	C	-0.1774	0.0391	5.7e-06	0.3111	C	T
rs4342401	chr6	168615935	T	A	-0.01395	0.03605	0.698784	0.497	A	T
rs1322639	chr6	169187008	A	G	-0.0212	0.04425	0.632	0.7744	G	A
rs6959688	chr7	1927195	G	A	0.0872	0.03785	0.021232	0.3847	A	G
rs2969070	chr7	2472910	A	G	-0.2366	0.03795	4.53e-10	0.6392	G	A
rs73049928	chr7	4630318	G	A	0.12035	0.04685	0.0102	0.2276	A	G
rs1468520	chr7	7251101	G	A	0.13675	0.04885	0.00512	0.1809	A	G
rs13240040	chr7	14336352	G	A	-0.1309	0.0411	0.00145	0.2913	A	G
rs2107595	chr7	19009765	A	G	0.1252	0.0495	0.011429	0.168	G	A
rs4507656	chr7	22116920	G	C	0.15315	0.04595	0.000859	0.3082	C	G
rs12979	chr7	24698545	G	C	-0.146	0.05495	0.007885	0.1312	C	G
rs1055144	chr7	25831489	T	C	0.0541	0.0462	0.241601	0.2068	C	T
rs6969780	chr7	27119517	C	G	0.2864	0.0629	5.28e-06	0.1004	G	C
rs7777128	chr7	27297494	C	G	0.4406	0.0664	3.23e-11	0.0686	G	C
rs10274928	chr7	28102469	G	A	-0.101	0.03565	0.00461	0.5258	A	G
rs917275	chr7	28618905	G	A	0.0391	0.038	0.304	0.4165	A	G
rs10233127	chr7	30893838	A	T	0.29265	0.0601	1.12e-06	0.0984	T	A
rs342989	chr7	35428286	G	A	-0.08745	0.04425	0.048124	0.7903	A	G
rs76206723	chr7	40408372	A	G	-0.1842	0.0591	0.00183	0.0934	G	A
rs12701929	chr7	41682896	C	T	-0.0881	0.04215	0.0366	0.7853	T	C
rs1004558	chr7	44200808	T	C	0.0783	0.0479	0.102121	0.1779	C	T
rs11977526	chr7	45968511	A	G	-0.1012	0.03845	0.008489	0.4026	G	A
rs71543920	chr7	46514760	G	T	0.13015	0.08035	0.105278	0.0577	T	G
rs12668436	chr7	47509295	C	T	0.079	0.0424	0.062433	0.2833	T	C
rs17454517	chr7	50848079	G	A	-0.0997	0.037	0.007047	0.5308	A	G
rs6593297	chr7	56054365	T	A	-0.10215	0.041	0.0127	0.6789	A	T
rs2222544	chr7	70304383	C	T	0.06365	0.04175	0.127371	0.2346	T	C
rs1091811	chr7	74076882	G	A	0.01905	0.0496	0.700925	0.8628	A	G
rs34324971	chr7	74693042	A	G	0.10845	0.0461	0.018648	0.161	A	G
rs848445	chr7	77943144	C	T	0.1141	0.04245	0.007191	0.7028	T	C
rs11770630	chr7	90175927	T	C	-0.0276	0.0358	0.441	0.507	C	T
rs10245696	chr7	90820047	C	A	-0.04575	0.03715	0.218138	0.5994	A	C
rs2282978	chr7	92635096	C	T	-0.0093	0.03875	0.81033	0.3598	T	C
rs1947228	chr7	96832337	C	T	0.0946	0.0359	0.008411	0.5626	T	C
rs12705090	chr7	100870078	T	C	0.02065	0.04545	0.64958	0.1899	C	T
rs17477177	chr7	106771412	C	T	0.28975	0.0448	9.95e-11	0.2227	T	C
rs115172170	chr7	107379502	C	T	0.22245	0.07675	0.003751	0.0557	T	C
rs1997571	chr7	116558567	A	G	-0.0249	0.0364	0.493934	0.6034	G	A
rs4728142	chr7	128933913	A	G	-0.14535	0.0371	8.94e-05	0.4493	G	A
rs11556924	chr7	130023656	T	C	-0.19535	0.03955	7.84e-07	0.3767	C	T
rs34072724	chr7	130747710	A	G	-0.12595	0.0357	0.000419	0.4493	G	A
rs13238550	chr7	131374297	A	G	0.12935	0.03745	0.000552	0.341	G	A
rs1722886	chr7	134530507	T	A	-0.10405	0.03715	0.0051	0.4155	A	T
rs10267979	chr7	136933441	A	T	-0.0564	0.03885	0.146575	0.3539	T	A
rs7810028	chr7	139761817	G	C	-0.1836	0.04615	6.94e-05	0.2137	C	G
rs12703989	chr7	140538248	A	G	0.1061	0.03775	0.004945	0.5	G	A
rs73727605	chr7	149777533	A	G	0.18175	0.07895	0.02133	0.0845	G	A
rs11771693	chr7	150353022	G	A	-0.0848	0.0394	0.031375	0.3211	A	G
rs3918226	chr7	150993088	T	C	0.54635	0.0722	3.81e-14	0.0984	C	T
rs1870735	chr7	155951609	G	C	-0.16055	0.03855	3.12e-05	0.5885	C	G
rs9638084	chr7	156519051	G	A	-0.1164	0.03715	0.001729	0.5845	A	G
rs4875958	chr8	1772924	A	G	0.15535	0.04095	0.000148	0.6779	G	A
rs2922895	chr8	6522411	C	G	0.14325	0.0371	0.000113	0.4354	G	C
rs61040371	chr8	8646190	C	T	-0.13555	0.0377	0.000324	0.3738	T	C
rs62491354	chr8	9873153	A	G	0.1306	0.05265	0.013119	0.1133	G	A
rs1986971	chr8	10411226	G	A	-0.13725	0.0414	0.000916	0.3101	A	G
rs2898290	chr8	11576400	C	T	-0.23715	0.037	1.46e-10	0.5527	T	C
rs1047030	chr8	22571195	G	A	-0.1623	0.0511	0.001493	0.2127	A	G
rs62503324	chr8	23543102	T	C	0.1602	0.04105	9.52e-05	0.2515	C	T
rs6557876	chr8	26043159	T	C	-0.28165	0.04235	2.92e-11	0.2674	C	T
rs17321041	chr8	26587678	T	C	0.3193	0.077	3.37e-05	0.0656	C	T
rs2979470	chr8	30430756	C	T	-0.15585	0.0365	1.96e-05	0.5149	T	C
rs11991469	chr8	32555762	G	C	0.11195	0.03585	0.001792	0.4692	C	G
rs7845722	chr8	33452475	A	G	-0.06385	0.0371	0.0852	0.6133	G	A
rs1906672	chr8	38272507	A	G	0.14895	0.04325	0.000573	0.2445	G	A
rs2978456	chr8	42467247	C	T	0.0595	0.03945	0.131494	0.4483	T	C
rs4873492	chr8	51034989	T	C	0.1595	0.05055	0.0016	0.1769	C	T
rs6996733	chr8	59623265	C	T	-0.107	0.0492	0.0296	0.1412	T	C
rs2354862	chr8	63589186	C	A	-0.1539	0.0385	6.4e-05	0.333	A	C
rs13253358	chr8	68007900	T	C	0.15875	0.04	7.23e-05	0.3042	C	T
rs1350100	chr8	75142669	G	A	0.01045	0.03725	0.779066	0.5706	A	G
rs1449544	chr8	75679645	C	A	-0.12915	0.03645	0.000395	0.4612	A	C
rs72688070	chr8	80481462	T	C	-0.15415	0.0476	0.0012	0.1958	C	T
rs56345595	chr8	81901921	G	A	-0.1076	0.03725	0.00387	0.4314	A	G
rs2142141	chr8	89927977	C	G	-0.11455	0.0389	0.003232	0.5219	G	C
rs7009170	chr8	91137201	C	T	0.0123	0.0391	0.753082	0.669	T	C
rs62526122	chr8	91757341	A	G	0.14275	0.04415	0.00122	0.2793	G	A
rs4582532	chr8	94957029	A	G	-0.0392	0.0356	0.271	0.5427	G	A
rs142449193	chr8	101738369	T	C	-0.339	0.08915	0.000143	0.0527	C	T
rs2513877	chr8	102871402	A	G	-0.126	0.0458	0.00594	0.2078	G	A
rs35783704	chr8	104954030	A	G	-0.38145	0.06135	5.05e-10	0.0994	G	A
rs28499085	chr8	109094932	G	A	-0.08725	0.04205	0.037995	0.2376	A	G
rs2205260	chr8	115947612	C	A	0.01475	0.0484	0.760555	0.832	A	C
rs2071518	chr8	119423572	T	C	0.0386	0.0416	0.353467	0.2247	C	T
rs62523863	chr8	125508302	A	G	0.11645	0.0435	0.007428	0.2316	G	A
rs4598218	chr8	128471710	T	C	0.0943	0.03765	0.012257	0.6193	C	T
rs894344	chr8	134600502	G	A	0.1185	0.03695	0.00134	0.4274	A	G
rs4454254	chr8	140049929	A	G	-0.11995	0.03775	0.001486	0.6402	G	A
rs10087782	chr8	140848521	C	T	-0.1136	0.0362	0.0017	0.5457	T	C
rs4129585	chr8	142231572	C	A	-0.12065	0.03585	0.000764	0.5547	A	C
rs62524579	chr8	142979538	A	G	-0.16575	0.0421	8.25e-05	0.5447	G	A
rs520015	chr9	211762	G	C	-0.15595	0.0364	1.83e-05	0.4712	C	G
rs60191654	chr9	753648	G	A	0.18195	0.0466	9.44e-05	0.1849	A	G
rs12216886	chr9	2493751	G	T	-0.10875	0.04555	0.016964	0.1839	T	G
rs28558845	chr9	4334791	C	G	-0.1126	0.04925	0.022237	0.163	G	C
rs1332813	chr9	9350706	C	T	-0.13865	0.03985	0.000503	0.6551	T	C
rs35287509	chr9	10594635	C	T	0.16505	0.03905	2.37e-05	0.3131	T	C
rs11789875	chr9	16872325	A	G	0.0426	0.0516	0.409042	0.1451	G	A
rs4977492	chr9	19057553	C	T	0.0381	0.0385	0.322	0.3032	T	C
rs4364717	chr9	21801531	G	A	0.096	0.03635	0.00827	0.4324	A	G
rs9886665	chr9	22942771	C	T	-0.1487	0.04145	0.000334	0.7455	T	C
rs4553000	chr9	34223555	T	C	-0.1016	0.0361	0.004887	0.503	C	T
rs76452347	chr9	35906474	T	C	-0.17055	0.0498	0.000615	0.2078	C	T
rs11141731	chr9	87273557	T	C	-0.1635	0.04385	0.000193	0.1928	C	T
rs7045409	chr9	92439258	A	T	-0.116	0.0382	0.002392	0.3549	T	A
rs10988442	chr9	98977427	G	A	-0.0307	0.03705	0.407325	0.4145	A	G
rs7020564	chr9	106907735	T	A	0.09135	0.0425	0.031602	0.3101	A	T
rs7043304	chr9	109595870	T	C	0.0853	0.05245	0.103884	0.8559	C	T
rs13290326	chr9	113934345	T	C	-0.10405	0.03705	0.004979	0.503	C	T
rs10982910	chr9	115772221	G	T	0.13775	0.06285	0.028399	0.1014	T	G
rs1861881	chr9	116549977	T	G	0.07895	0.0388	0.041872	0.3161	G	T
rs1953126	chr9	120878222	C	T	-0.09895	0.0382	0.00959	0.6402	T	C
rs10818775	chr9	122993292	T	C	-0.14935	0.0556	0.007228	0.1223	C	T
rs7861040	chr9	124281856	C	G	-0.0767	0.0405	0.058248	0.334	G	C
rs72765298	chr9	125138717	C	T	0.1945	0.0579	0.000782	0.1133	T	C
rs7023828	chr9	125736315	T	C	-0.1247	0.03695	0.000739	0.4314	C	T
rs1891730	chr9	127546749	C	T	0.1407	0.0382	0.00023	0.3489	T	C
rs7869756	chr9	128448131	G	A	-0.0145	0.0478	0.761625	0.2346	A	G
rs184457	chr9	129177740	A	G	-0.11125	0.04275	0.009259	0.2783	G	A
rs687621	chr9	133261662	G	A	-0.1153	0.0387	0.002889	0.3708	G	A
rs56352451	chr10	5762902	T	C	0.0853	0.05225	0.103	0.1233	C	T
rs36006409	chr10	10834980	G	T	0.141	0.0479	0.003244	0.1998	T	G
rs10906391	chr10	13481937	T	C	0.1171	0.03915	0.00278	0.3469	C	T
rs4373814	chr10	18131043	C	G	0.20585	0.037	2.64e-08	0.4662	G	C
rs1813353	chr10	18418519	C	T	-0.3548	0.0383	1.97e-20	0.338	T	C
rs72795925	chr10	20242491	T	C	0.0227	0.04315	0.598838	0.1839	C	T
rs10732433	chr10	20748365	T	C	0.02465	0.03665	0.501216	0.3748	C	T
rs3802517	chr10	27944540	A	T	0.13045	0.0362	0.000314	0.4652	T	A
rs1265842	chr10	28635972	C	T	-0.1539	0.03685	2.96e-05	0.5109	T	C
rs9337951	chr10	30028144	A	G	-0.01	0.0419	0.811367	0.3489	G	A
rs11008355	chr10	31123632	C	G	-0.0262	0.04305	0.542793	0.2604	G	C
rs10826995	chr10	31793730	C	T	0.03445	0.0408	0.398467	0.2793	T	C
rs76164690	chr10	32301434	G	T	0.15475	0.054	0.00416	0.1233	T	G
rs10761530	chr10	60630968	C	T	-0.1977	0.03615	4.53e-08	0.5089	T	C
rs1530440	chr10	61764833	T	C	-0.42845	0.0466	3.78e-20	0.1899	C	T
rs7090758	chr10	63575555	C	T	0.10015	0.0369	0.006646	0.4642	T	C
rs7914287	chr10	67590805	C	T	0.0752	0.0444	0.090324	0.2306	T	C
rs10823136	chr10	68095606	C	T	0.22175	0.06825	0.001158	0.0835	T	C
rs10998362	chr10	68644402	T	C	0.0033	0.0421	0.937522	0.3121	C	T
rs10887914	chr10	80455532	C	T	-0.0994	0.0357	0.005364	0.5765	T	C
rs77413490	chr10	87921931	T	G	0.3514	0.0943	0.000194	0.0427	G	T
rs11187142	chr10	92708928	C	T	-0.18505	0.0605	0.002223	0.8986	T	C
rs932764	chr10	94136183	G	A	0.2567	0.0371	4.54e-12	0.4344	A	G
rs4494250	chr10	94804000	A	G	0.2164	0.0386	2.07e-08	0.333	G	A
rs603424	chr10	100315722	A	G	0.1486	0.04975	0.002818	0.1968	G	A
rs112184198	chr10	100844757	A	G	-0.4167	0.06045	5.45e-12	0.0915	G	A
rs11191156	chr10	101943006	G	A	0.0296	0.03845	0.4414	0.3419	A	G
rs11191548	chr10	103086421	C	T	-0.73895	0.065	6e-30	0.0885	T	C
rs4387287	chr10	103918139	C	A	-0.1812	0.0496	0.000259	0.8459	A	C
rs34872471	chr10	112994312	C	T	0.0931	0.04045	0.021357	0.3151	T	C
rs2782980	chr10	114021768	C	T	0.2906	0.0414	2.23e-12	0.6968	T	C
rs11197813	chr10	116764422	G	A	0.1141	0.0399	0.004241	0.2972	A	G
rs72842207	chr10	119674163	T	C	-0.11795	0.0441	0.007482	0.2177	C	T
rs11592107	chr10	121209450	A	G	0.19205	0.03935	1.06e-06	0.3012	G	A
rs72834453	chr10	122475710	G	T	0.1655	0.05665	0.003484	0.1292	T	G
rs4411245	chr10	125024212	A	G	0.1262	0.0396	0.00144	0.3181	G	A
rs7096563	chr10	131956725	G	A	-0.11165	0.0381	0.00338	0.6074	A	G
rs1133400	chr10	132645884	G	A	0.122	0.0442	0.005777	0.2137	A	G
rs661348	chr11	1884062	C	T	0.25145	0.03975	2.52e-10	0.4254	T	C
rs17224476	chr11	4652558	A	G	0.1413	0.058	0.014842	0.1173	G	A
rs2929184	chr11	6267888	G	A	-0.1216	0.0457	0.007795	0.2097	A	G
rs110419	chr11	8231306	G	A	-0.09875	0.0373	0.00811	0.5229	A	G
rs10743086	chr11	8753376	A	G	-0.10325	0.0452	0.022354	0.2107	G	A
rs360153	chr11	9740727	C	T	0.1448	0.03665	7.79e-05	0.5974	T	C
rs7129220	chr11	10328991	A	G	0.29025	0.0575	4.47e-07	0.1292	G	A
rs900145	chr11	13272358	T	C	0.1163	0.03965	0.003355	0.7237	C	T
rs4757391	chr11	16281393	T	C	-0.3959	0.0455	3.29e-18	0.8062	C	T
rs381815	chr11	16880721	T	C	0.28435	0.0409	3.59e-12	0.2952	C	T
rs5219	chr11	17388025	C	T	-0.2389	0.03745	1.78e-10	0.6471	T	C
rs10766533	chr11	19203130	A	T	0.1801	0.0409	1.07e-05	0.6759	T	A
rs11026586	chr11	22493987	A	G	0.15975	0.0729	0.028426	0.0716	G	A
rs11030119	chr11	27706555	A	G	-0.15155	0.04045	0.000179	0.2823	G	A
rs871004	chr11	28490911	A	G	0.09835	0.0387	0.011043	0.3598	G	A
rs919045	chr11	31090263	C	T	-0.07185	0.0376	0.056017	0.4066	T	C
rs4922591	chr11	32352653	C	T	0.1309	0.03795	0.000562	0.5944	T	C
rs7480089	chr11	45186300	A	G	-0.124	0.0569	0.029312	0.1272	G	A
rs1585453	chr11	46863162	T	A	0.30055	0.066	5.27e-06	0.1252	A	T
rs7103648	chr11	47440232	G	A	0.24905	0.03765	3.72e-11	0.3738	A	G
rs11537751	chr11	47565900	T	C	0.3025	0.0852	0.000385	0.0586	C	T
rs75905900	chr11	55346058	C	A	-0.2505	0.05605	7.85e-06	0.1272	A	C
rs11607056	chr11	57729348	T	C	-0.04475	0.03785	0.237087	0.3111	C	T
rs11229457	chr11	58439730	T	C	-0.2237	0.04475	5.77e-07	0.2097	C	T
rs751984	chr11	61510774	C	T	-0.3988	0.0586	1.01e-11	0.1183	T	C
rs4980515	chr11	63977137	C	T	-0.1235	0.0387	0.001417	0.504	T	C
rs3741378	chr11	65641466	T	C	-0.2996	0.05525	5.87e-08	0.1312	C	T
rs67976715	chr11	68256274	C	G	0.13325	0.0448	0.002936	0.2346	G	C
rs67330701	chr11	69312240	T	C	-0.25395	0.07235	0.000448	0.0895	C	T
rs875106	chr11	70159535	A	G	-0.0111	0.03655	0.761361	0.5149	G	A
rs504217	chr11	72295042	T	C	0.36985	0.0705	1.55e-07	0.0915	C	T
rs2298807	chr11	73357526	C	T	-0.12495	0.0441	0.004607	0.2018	T	C
rs4420291	chr11	74663905	A	G	0.0774	0.0363	0.032988	0.5199	G	A
rs7927515	chr11	76414286	A	C	0.1307	0.0388	0.000756	0.3419	C	A
rs59986178	chr11	77648864	C	G	0.191	0.0679	0.004909	0.0964	G	C
rs2450128	chr11	78229029	A	G	-0.1562	0.0503	0.0019	0.1769	G	A
rs2289125	chr11	89491285	C	A	0.0577	0.04625	0.212189	0.7813	A	C
rs10830963	chr11	92975544	G	C	0.0112	0.0395	0.77676	0.2883	C	G
rs11021221	chr11	95575690	A	T	-0.0362	0.0486	0.456	0.1581	T	A
rs633185	chr11	100722807	C	G	0.38875	0.0403	5.09e-22	0.7227	G	C
rs61892344	chr11	101230037	T	C	-0.1068	0.04795	0.025926	0.1779	C	T
rs12807220	chr11	102206469	A	G	-0.01645	0.0383	0.667557	0.3966	G	A
rs4754196	chr11	107226051	G	A	0.1393	0.03595	0.000107	0.4642	A	G
rs17119370	chr11	116226419	A	T	0.04055	0.0384	0.291	0.6491	T	A
rs1076485	chr11	116901725	T	C	0.17455	0.0524	0.000865	0.1421	C	T
rs8258	chr11	117412960	C	T	0.01545	0.03795	0.683924	0.6312	T	C
rs12574332	chr11	122650415	T	C	0.1919	0.0558	0.000584	0.1103	C	T
rs11222386	chr11	130909173	C	G	0.0442	0.04555	0.332	0.1909	G	C
rs11571376	chr12	950390	G	C	0.13005	0.04055	0.00134	0.3052	C	G
rs55935819	chr12	2412413	A	G	0.1633	0.03795	1.68e-05	0.3797	G	A
rs75507123	chr12	5308690	T	G	-0.09175	0.0548	0.094078	0.1262	G	T
rs7132012	chr12	8679607	G	A	-0.11715	0.0382	0.002164	0.3091	A	G
rs2024385	chr12	12735504	A	T	-0.1213	0.0405	0.002744	0.4145	T	A
rs28621435	chr12	13708056	A	G	-0.22595	0.05825	0.000105	0.1153	G	A
rs7313556	chr12	15144425	G	A	-0.06515	0.0384	0.08977	0.6352	A	G
rs61912333	chr12	19401883	G	C	-0.145	0.03705	9.09e-05	0.4821	C	G
rs12579720	chr12	20020830	G	C	0.2868	0.04335	3.69e-11	0.7336	C	G
rs73080726	chr12	20601220	T	C	-0.0361	0.05935	0.543018	0.1014	C	T
rs704191	chr12	21862088	C	T	-0.032	0.0371	0.388	0.5815	T	C
rs7976167	chr12	24057665	C	T	-0.0841	0.04025	0.0367	0.325	T	C
rs17287293	chr12	24617944	G	A	-0.03315	0.05085	0.514454	0.1551	A	G
rs6487543	chr12	26285256	A	G	0.14055	0.04495	0.00177	0.7972	G	A
rs10842991	chr12	27809170	T	C	-0.10645	0.04485	0.017622	0.2087	C	T
rs7965392	chr12	42146478	A	G	0.1411	0.0378	0.000189	0.3907	G	A
rs11168245	chr12	47810716	G	C	-0.21215	0.04265	6.55e-07	0.2157	C	G
rs2261608	chr12	48327851	T	A	-0.05575	0.03725	0.134486	0.6491	A	T
rs1126930	chr12	49005349	C	G	0.41785	0.1115	0.000179	0.0239	G	C
rs7977389	chr12	49587939	C	T	-0.12205	0.05955	0.04041	0.1054	T	C
rs7302981	chr12	50144032	G	A	-0.3027	0.0368	1.94e-16	0.6024	A	G
rs73099903	chr12	53046995	T	C	0.32015	0.06995	4.72e-06	0.0825	C	T
rs7297416	chr12	54049306	C	A	-0.2057	0.03995	2.62e-07	0.3191	A	C
rs7137749	chr12	56704256	C	T	-0.06665	0.0374	0.074735	0.6282	T	C
rs10437954	chr12	57610139	A	G	-0.1729	0.06035	0.004171	0.9066	G	A
rs4143175	chr12	67388617	C	T	-0.2215	0.0426	2e-07	0.7535	T	C
rs513177	chr12	69556765	T	C	0.1332	0.05255	0.011253	0.1431	C	T
rs7963801	chr12	79291446	C	T	0.09315	0.03895	0.016778	0.5805	T	C
rs17249754	chr12	89666809	A	G	-0.60455	0.04945	2.27e-34	0.1441	G	A
rs10858966	chr12	90173249	C	G	0.20945	0.04405	1.99e-06	0.2922	G	C
rs76785029	chr12	94489129	T	C	0.04445	0.0777	0.567273	0.0706	C	T
rs7977311	chr12	95093450	T	C	-0.01825	0.0579	0.753	0.1153	C	T
rs11108209	chr12	95716077	C	T	0.1993	0.06365	0.001741	0.0934	T	C
rs7134060	chr12	96323317	A	G	-0.07095	0.0362	0.050002	0.4523	G	A
rs11112548	chr12	105478136	T	A	-0.28335	0.0919	0.002048	0.0378	A	T
rs3184504	chr12	111446804	C	T	-0.5092	0.0372	1.19e-42	0.5358	T	C
rs10850411	chr12	114949991	C	T	-0.2446	0.03945	5.64e-10	0.3032	T	C
rs35444	chr12	115114632	G	A	-0.2761	0.03765	2.24e-13	0.3976	A	G
rs11067763	chr12	115760536	G	A	-0.16685	0.06015	0.005539	0.0944	A	G
rs11615689	chr12	116261870	C	T	0.0264	0.0498	0.596028	0.1899	T	C
rs3898618	chr12	120376118	C	T	0.2082	0.08255	0.011665	0.0537	T	C
rs1060105	chr12	123321672	T	C	-0.1325	0.0457	0.003739	0.2227	C	T
rs1271309	chr12	124336159	G	A	0.146	0.0504	0.00377	0.8569	A	G
rs55641580	chr13	24683779	T	C	0.1277	0.05605	0.022707	0.1352	C	T
rs1331012	chr13	26541287	T	G	0.1164	0.0407	0.004237	0.2843	G	T
rs9508495	chr13	29572064	T	C	-0.2998	0.04225	1.29e-12	0.7396	C	T
rs9532243	chr13	31617271	C	A	-0.264	0.0358	1.65e-13	0.5557	A	C
rs9549297	chr13	40823346	G	A	0.133	0.04845	0.006049	0.1779	A	G
rs73187288	chr13	42164536	C	A	0.12945	0.06165	0.0358	0.0984	A	C
rs912434	chr13	46615793	T	G	0.0958	0.04305	0.0261	0.7813	G	T
rs12583615	chr13	49989949	A	G	0.186	0.0523	0.000376	0.1511	G	A
rs9526707	chr13	50915050	A	G	-0.1176	0.0395	0.002909	0.327	G	A
rs75961402	chr13	55824152	A	G	0.2028	0.05075	6.44e-05	0.1312	G	A
rs9563529	chr13	57742503	T	G	0.0784	0.04575	0.086591	0.1938	G	T
rs3861113	chr13	71790250	A	C	0.16815	0.06495	0.009628	0.0795	C	A
rs4304924	chr13	78664790	A	G	-0.0199	0.036	0.580416	0.5805	G	A
rs7988232	chr13	79234520	A	G	0.10585	0.03705	0.004277	0.4036	G	A
rs1215469	chr13	80133273	C	A	0.16825	0.04495	0.000182	0.7803	A	C
rs55684003	chr13	97336435	G	A	-0.0856	0.03945	0.03	0.3002	A	G
rs3742182	chr13	110722785	T	C	-0.03075	0.0454	0.498208	0.7734	C	T
rs9549328	chr13	112981842	T	C	0.1442	0.04415	0.00109	0.2316	C	T
rs7331680	chr13	114235175	T	G	0.2542	0.0505	4.81e-07	0.172	G	T
rs452036	chr14	23396676	A	G	-0.0288	0.03835	0.453	0.336	G	A
rs17115145	chr14	29653203	T	C	0.078	0.0375	0.037526	0.4056	C	T
rs4424827	chr14	34641651	T	C	-0.1173	0.03605	0.00114	0.5736	C	T
rs8904	chr14	35402011	A	G	0.22015	0.0381	7.55e-09	0.3907	G	A
rs34983854	chr14	39389238	G	A	0.16105	0.03695	1.31e-05	0.3718	A	G
rs9888615	chr14	52910822	C	T	0.1583	0.03985	7.12e-05	0.6998	T	C
rs210381	chr14	53641073	A	G	-0.1122	0.0376	0.00284	0.5497	G	A
rs7144602	chr14	54818870	G	T	0.0682	0.03935	0.083067	0.3509	T	G
rs11628933	chr14	60234185	C	G	-0.1465	0.04265	0.000593	0.2167	G	C
rs731681	chr14	67543507	C	G	-0.15015	0.03625	3.44e-05	0.5179	G	C
rs57786342	chr14	68793311	A	G	0.13395	0.045	0.00291	0.2157	G	A
rs11623535	chr14	71995664	A	G	0.1624	0.0408	6.88e-05	0.7237	G	A
rs4903064	chr14	72812712	C	T	-0.0387	0.04205	0.357399	0.2416	T	C
rs11159091	chr14	74607613	A	G	0.08115	0.03655	0.026402	0.4672	G	A
rs11627326	chr14	85318907	C	G	0.0023	0.04025	0.954431	0.3042	G	C
rs4904503	chr14	89098786	T	C	0.05095	0.03975	0.199926	0.2982	C	T
rs11160085	chr14	92645757	C	T	-0.07355	0.0415	0.0763	0.3012	T	C
rs8013933	chr14	93999443	C	T	0.0025	0.04045	0.951	0.2932	T	C
rs9323988	chr14	98121293	C	T	0.1741	0.03705	2.61e-06	0.4105	T	C
rs1475130	chr14	99758807	C	T	0.08185	0.03875	0.034664	0.6491	T	C
rs28470843	chr14	100276321	C	T	-0.0034	0.03725	0.927274	0.4115	T	C
rs11626434	chr14	101532106	C	G	-0.0519	0.03985	0.192785	0.3797	G	C
rs8014182	chr14	103393625	T	C	-0.2551	0.0536	1.94e-06	0.1243	C	T
rs10873612	chr15	25860455	T	C	-0.10285	0.03805	0.006871	0.5885	C	T
rs11629850	chr15	40024874	A	G	0.1235	0.03605	0.000613	0.5298	G	A
rs2925345	chr15	41019601	C	T	-0.11325	0.0363	0.00181	0.5109	T	C
rs4924570	chr15	41682462	C	T	0.0416	0.0399	0.297131	0.4016	T	C
rs1036477	chr15	48622729	G	A	-0.13725	0.05905	0.020109	0.1173	A	G
rs3098186	chr15	50518424	T	C	-0.08805	0.03705	0.0175	0.5308	C	T
rs3191402	chr15	59136961	A	G	-0.1004	0.0401	0.0123	0.3797	G	A
rs956006	chr15	62516340	T	C	-0.01365	0.0394	0.729007	0.328	C	T
rs832890	chr15	64874110	T	C	0.011	0.03625	0.761548	0.4155	C	T
rs7178615	chr15	66576734	G	A	0.1371	0.0378	0.000287	0.5994	A	G
rs2289261	chr15	67165147	C	G	-0.02325	0.0392	0.553106	0.6252	G	C
rs62004794	chr15	68162185	G	A	0.05355	0.0363	0.140157	0.5666	A	G
rs11853359	chr15	71329185	A	G	-0.04825	0.0384	0.209	0.3529	G	A
rs61653296	chr15	74265476	G	A	0.1527	0.04565	0.000823	0.2256	A	G
rs11634028	chr15	75983809	A	T	0.23235	0.0507	4.59e-06	0.1909	T	A
rs62011052	chr15	78864641	C	T	-0.06835	0.05145	0.184	0.1521	T	C
rs2759308	chr15	80723886	A	G	0.1884	0.03675	2.95e-07	0.4612	G	A
rs2034618	chr15	83130880	T	C	-0.0622	0.0439	0.156525	0.1988	C	T
rs899927	chr15	83893127	T	C	-0.0568	0.0898	0.527049	0.3241	C	T
rs7180952	chr15	84619320	T	C	-0.0518	0.0364	0.154714	0.5437	C	T
rs3743157	chr15	85137301	A	C	0.1335	0.0476	0.005038	0.1491	C	A
rs11632436	chr15	85752055	C	G	0.1204	0.0364	0.000941	0.492	G	C
rs28611491	chr15	90098577	T	C	0.0305	0.06335	0.63	0.0934	C	T
rs2521501	chr15	90894158	T	A	0.4551	0.04125	2.66e-28	0.3191	A	T
rs873122	chr15	92158790	C	G	0.1002	0.0407	0.01382	0.7435	G	C
rs11632112	chr15	92925046	G	C	0.10715	0.0425	0.011696	0.7704	C	G
rs12906962	chr15	94768842	C	T	0.2273	0.0394	7.97e-09	0.3459	T	C
rs4984496	chr15	96092669	G	T	-0.0869	0.0391	0.0262	0.6561	T	G
rs34756251	chr15	99652335	T	C	-0.1671	0.04835	0.000548	0.167	C	T
rs9932866	chr16	656067	A	G	0.09875	0.0368	0.00729	0.3767	G	A
rs11248862	chr16	1294290	G	A	-0.0213	0.05685	0.707906	0.8847	A	G
rs2379829	chr16	3488873	C	G	-0.17435	0.0417	2.9e-05	0.7256	G	C
rs4785955	chr16	4247650	T	G	0.05605	0.04575	0.220524	0.2227	G	T
rs12921187	chr16	4893018	G	T	0.1991	0.0366	5.33e-08	0.5517	T	G
rs35450617	chr16	6839674	G	T	0.0923	0.03965	0.019919	0.2803	T	G
rs11642631	chr16	11104978	C	T	-0.00015	0.03645	0.997	0.4414	T	C
rs57327054	chr16	14393179	T	C	-0.0891	0.0407	0.028583	0.3042	C	T
rs3915425	chr16	15818687	C	T	-0.0766	0.039	0.049518	0.328	T	C
rs13333226	chr16	20354332	G	A	-0.2945	0.04635	2.1e-10	0.2018	A	G
rs11639856	chr16	24777324	A	T	-0.1485	0.0459	0.001215	0.162	T	A
rs72799341	chr16	30925422	A	G	0.12605	0.04315	0.003487	0.2505	G	A
rs10468291	chr16	49734135	A	C	-0.1204	0.037	0.001138	0.5726	C	A
rs34941092	chr16	50516226	A	G	-0.24765	0.05195	1.87e-06	0.1799	G	A
rs9932220	chr16	51724205	A	G	-0.19745	0.04385	6.7e-06	0.1978	G	A
rs37060	chr16	58532400	A	G	0.05045	0.0407	0.215139	0.2376	G	A
rs28633979	chr16	65248917	C	A	0.02415	0.0364	0.507035	0.5189	A	C
rs45474499	chr16	66880589	T	C	0.2892	0.08755	0.000956	0.0547	C	T
rs7185555	chr16	69097378	C	G	-0.04235	0.05455	0.437541	0.1392	G	C
rs33063	chr16	69606314	G	A	-0.0544	0.05165	0.29223	0.8588	A	G
rs1012089	chr16	74138074	G	C	0.10725	0.03645	0.003257	0.5288	C	G
rs56844452	chr16	80830879	T	C	-0.17825	0.0728	0.014346	0.0716	C	T
rs8059962	chr16	81540592	C	T	0.1413	0.0373	0.000152	0.5547	T	C
rs7500448	chr16	83012185	G	A	-0.0994	0.0426	0.019631	0.2435	A	G
rs7187540	chr16	85284696	A	C	-0.1005	0.03965	0.011255	0.2972	C	A
rs3851018	chr16	86404205	C	G	0.167	0.0378	9.96e-06	0.5437	G	C
rs6540125	chr16	87960283	G	T	-0.1289	0.03795	0.000682	0.6173	T	G
rs12941318	chr17	1430304	C	T	0.1439	0.0386	0.000193	0.4662	T	C
rs4480845	chr17	2055315	C	T	-0.0703	0.0387	0.069288	0.6412	T	C
rs7215084	chr17	3976854	T	C	0.15525	0.03605	1.66e-05	0.5199	C	T
rs8069739	chr17	8175447	C	T	0.1482	0.03825	0.000107	0.6809	T	C
rs4925159	chr17	18282196	A	G	0.2256	0.0363	5.14e-10	0.4155	G	A
rs7502046	chr17	19293127	T	C	0.11025	0.0491	0.0247	0.8121	C	T
rs11080134	chr17	30834485	G	A	0.0979	0.03745	0.00894	0.327	A	G
rs1551355	chr17	31705401	T	C	0.14055	0.04245	0.00093	0.2366	C	T
rs3135967	chr17	34986710	G	A	-0.0286	0.03655	0.434	0.4891	A	G
rs56228409	chr17	42767578	C	A	0.00815	0.04945	0.869091	0.1302	A	C
rs12946454	chr17	45130754	T	A	0.23475	0.0414	1.43e-08	0.2833	A	T
rs4792830	chr17	46121924	C	T	0.18315	0.05545	0.000957	0.1779	T	C
rs17608766	chr17	46935905	C	T	0.4021	0.0534	5.08e-14	0.174	T	C
rs7406910	chr17	48610894	C	T	0.3235	0.06485	6.09e-07	0.9056	T	C
rs12940887	chr17	49325445	T	C	0.25665	0.03745	7.22e-12	0.3628	C	T
rs12325702	chr17	57369003	T	A	-0.0145	0.03905	0.71	0.5706	A	T
rs34430710	chr17	58799266	T	A	0.14545	0.0398	0.000258	0.3519	A	T
rs2645466	chr17	59775853	C	A	0.1134	0.03945	0.004046	0.2952	A	C
rs1036902	chr17	60873430	C	T	0.11915	0.04905	0.0151	0.162	T	C
rs2240736	chr17	61408032	T	C	0.3374	0.04195	8.77e-16	0.7286	C	T
rs4308	chr17	63482264	G	A	-0.228	0.0381	2.17e-09	0.6332	A	G
rs6504213	chr17	64304354	C	T	0.06365	0.03785	0.092639	0.6342	T	C
rs112260610	chr17	66256275	T	C	0.24085	0.05335	6.35e-06	0.1441	C	T
rs2467099	chr17	75952964	T	C	-0.13735	0.0438	0.00171	0.2396	C	T
rs35504735	chr17	76690727	G	A	0.00085	0.03595	0.981137	0.4702	A	G
rs9302885	chr17	78803816	G	A	-0.08235	0.0365	0.0241	0.5477	A	G
rs34413141	chr18	777281	A	T	-0.17975	0.0499	0.000316	0.1769	T	A
rs963920	chr18	12711053	G	T	0.04535	0.0397	0.253322	0.3062	T	G
rs4800420	chr18	22579002	A	G	0.02515	0.03905	0.519546	0.3072	G	A
rs12958173	chr18	44562012	C	A	-0.2646	0.03955	2.23e-11	0.7058	A	C
rs7236548	chr18	45517785	A	C	0.1345	0.0465	0.00382	0.2008	C	A
rs745821	chr18	50616484	G	T	-0.15915	0.04205	0.000154	0.2575	T	G
rs11876341	chr18	51273621	G	A	0.18095	0.03995	5.91e-06	0.3171	A	G
rs34163044	chr18	54325246	A	C	0.1265	0.0382	0.000928	0.4374	C	A
rs72930904	chr18	54940070	T	C	-0.1895	0.0497	0.000137	0.1421	C	T
rs12605156	chr18	55830883	T	A	-0.1648	0.04595	0.000335	0.2008	A	T
rs10048404	chr18	56911251	T	C	-0.0999	0.04435	0.024288	0.3857	C	T
rs7235890	chr18	58064883	T	G	-0.2236	0.0605	0.000219	0.8917	G	T
rs6567160	chr18	60161902	C	T	-0.12325	0.04325	0.004376	0.2396	T	C
rs12172847	chr18	62555784	A	G	-0.1057	0.03925	0.007081	0.2893	G	A
rs10460108	chr18	75322196	G	A	-0.15945	0.0361	1e-05	0.506	A	G
rs1047922	chr18	76358607	C	T	0.0674	0.0568	0.235378	0.1282	T	C
rs740406	chr19	2232222	G	A	0.37365	0.081	3.97e-06	0.0746	A	G
rs2613765	chr19	5066319	A	G	-0.1449	0.03595	5.56e-05	0.4483	G	A
rs2009733	chr19	8333830	G	A	-0.10235	0.0379	0.006923	0.4821	A	G
rs10409243	chr19	10222312	T	C	-0.1001	0.03835	0.00905	0.5845	C	T
rs1529744	chr19	10730796	C	T	-0.0394	0.03925	0.315465	0.6332	T	C
rs17638167	chr19	11474003	T	C	-0.38035	0.08755	1.4e-05	0.0547	C	T
rs10418305	chr19	15167997	G	C	-0.00395	0.06025	0.948	0.8817	C	G
rs3745318	chr19	16325451	C	T	-0.174	0.045	0.00011	0.7684	T	C
rs1077795	chr19	17111774	G	A	-0.12235	0.0448	0.00631	0.2495	A	G
rs8111708	chr19	18448066	G	A	0.0149	0.03825	0.696875	0.3459	A	G
rs2304130	chr19	19678719	G	A	0.2704	0.0686	8.09e-05	0.0825	A	G
rs6511291	chr19	21767600	C	T	0.0855	0.03765	0.0232	0.5586	T	C
rs62104477	chr19	29804084	T	G	0.10855	0.0389	0.005263	0.2813	G	T
rs1821295	chr19	32099867	T	C	-0.1132	0.0396	0.004255	0.7147	C	T
rs7256564	chr19	33398687	G	A	-0.1566	0.0389	5.68e-05	0.6918	A	G
rs12983238	chr19	38947892	G	A	0.1653	0.04585	0.000312	0.7018	A	G
rs73046792	chr19	49102448	A	G	-0.174	0.0551	0.001589	0.163	G	A
rs2143635	chr20	2812417	C	T	0.07375	0.06335	0.244356	0.0825	T	C
rs1764975	chr20	4120643	A	T	0.2149	0.0463	3.46e-06	0.8231	T	A
rs11087740	chr20	6676907	C	T	0.0229	0.03615	0.526426	0.501	T	C
rs6108168	chr20	8645624	A	C	-0.1726	0.04145	3.13e-05	0.2326	C	A
rs680515	chr20	10478040	G	A	-0.00495	0.0387	0.898223	0.6233	A	G
rs1327235	chr20	10988382	G	A	0.2969	0.03595	1.47e-16	0.4622	A	G
rs1232482	chr20	11905995	T	C	-0.1078	0.03675	0.003353	0.4105	C	T
rs2618647	chr20	17901808	G	A	0.1486	0.03635	4.35e-05	0.5209	A	G
rs6081613	chr20	19485263	A	G	0.0239	0.0404	0.554129	0.2793	G	A
rs6141767	chr20	32637267	C	G	0.16855	0.0486	0.000524	0.163	G	C
rs6141479	chr20	34534138	C	G	0.0662	0.04785	0.166515	0.2237	G	C
rs4811601	chr20	38220605	T	C	-0.09655	0.03655	0.00825	0.4324	C	T
rs4810332	chr20	41639695	A	T	-0.114	0.03735	0.00227	0.3688	T	A
rs6031435	chr20	44168718	G	A	0.16895	0.03645	3.57e-06	0.4791	A	G
rs6095241	chr20	48692260	A	G	-0.1561	0.03625	1.66e-05	0.4563	G	A
rs237485	chr20	49387701	G	A	-0.1354	0.0403	0.00078	0.3101	A	G
rs6021247	chr20	51492442	A	G	0.1209	0.03565	0.000696	0.5398	G	A
rs6015450	chr20	59176062	G	A	0.56755	0.0552	8.52e-25	0.1272	A	G
rs1882961	chr21	15184047	T	C	0.159	0.04035	8.13e-05	0.3072	C	T
rs11909120	chr21	28759550	T	A	0.07575	0.05125	0.139	0.1382	A	T
rs11701033	chr21	32416033	G	C	0.17915	0.0473	0.000152	0.1998	C	G
rs62229372	chr21	36320209	T	C	0.18935	0.06215	0.00231	0.1352	C	T
rs2277788	chr21	39445776	G	C	0.02105	0.05905	0.721483	0.9165	C	G
rs12627651	chr21	43340723	A	G	0.33205	0.0422	3.59e-15	0.3022	G	A
rs9306160	chr21	43687681	C	T	0.1878	0.0379	7.23e-07	0.6173	T	C
rs11701512	chr21	46542898	G	A	-0.0064	0.04775	0.893378	0.827	A	G
rs12628032	chr22	19980457	T	C	0.1076	0.03985	0.006931	0.3042	C	T
rs9608690	chr22	28525359	A	G	-0.23215	0.0728	0.001428	0.0666	G	A
rs5753103	chr22	30372788	A	G	0.0393	0.03665	0.283583	0.4771	G	A
rs9609429	chr22	32121444	C	T	-0.15245	0.041	0.000201	0.2445	T	C
rs5750482	chr22	37721936	C	T	-0.06015	0.03715	0.105	0.5825	T	C
rs470113	chr22	40333610	G	A	0.00925	0.0463	0.84165	0.1561	A	G
rs77692990	chr22	49826304	T	C	-0.08375	0.06585	0.203	0.0815	C	T
