# Supplementary material for: Whole genome sequencing and analysis of 4,053 individuals in trios and mother-infant duos from the Born in Guangzhou Cohort Study
Source: Research Square preprint supplement (doi:10.21203/rs.3.rs-1732885/v1), 2022-06-10
Supplement: Supplementary file 23 [file aaa5da7ab953deb1161928aa.docx]

## **Extended data Table 2 | Summary of the GWAS discoveries for the 12 adult traits and 6 infant traits.**

| Group | Triats (Phenotype) | Sample size | No. of variants | Lambda  value | GWAS significant loci (*P* value ≤5e-8) | | |
| --- | --- | --- | --- | --- | --- | --- | --- |
| **Total** | **Known** | **Novel** |
| Adult/Mother | **Anthropometric** | | | | | | |
| Height (prepregnancy) | 2196 | 7,143,653 | 1.005 | 0 | 0 | 0 |
| Weight (prepregnancy) | 2166 | 7,140,326 | 0.999 | 0 | 0 | 0 |
| BMI (prepregnancy) | 2172 | 7,140,326 | 1.001 | 0 | 0 | 0 |
| Gestational weight gain (GWG) rate | 1571 | 7,065,536 | 0.994 | 1 | 0 | 1 |
| **OGTT glucose (Collected in 24-28 weeks of pregnancy)** | | | | | | |
| OGTT 0H (Fasting) | 1689 | 7,076,809 | 1 | 2 | 2 | 0 |
| OGTT 1H | 1692 | 7,077,011 | 0.997 | 1 | 1 | 0 |
| OGTT 2H | 1690 | 7,076,710 | 0.922 | 0 | 0 | 0 |
| **Biochemical (Collected in 16-20 weeks of pregnancy)** | | | | | | |
| Total cholesterol (TC) | 1540 | 7,063,930 | 0.997 | 2 | 2 | 0 |
| High-density lipoprotein (HDL) | 1537 | 7,063,589 | 0.999 | 1 | 1 | 0 |
| Low-density lipoprotein (LDL) | 1537 | 7,063,422 | 0.995 | 2 | 2 | 0 |
| Triglycerides (TG) | 1536 | 7,063,063 | 0.994 | 1 | 1 | 0 |
| Total Bile Acid (TBA) | 1701 | 7,078,159 | 0.984 | 1 | 0 | 1 |
| **Fetal growth (Collected at birth)** | | | | | | |
| Birth length | 1606 | 7,071,240 | 0.975 | 0 | 0 | 0 |
| Birth weight | 1619 | 7,071,977 | 0.999 | 0 | 0 | 0 |
| **Total** | | | | 11 | 9 | 2 |
| Infant | **Biochemical of cord blood (Collected at birth)** | | | | | | |
| Total cholesterol (TC) | 1464 | 7,048,352 | 1.001 | 0 | 0 | 0 |
| High-density lipoprotein (HDL) | 1463 | 7,048,037 | 0.999 | 1 | 1 | 0 |
| Low-density lipoprotein (LDL) | 1462 | 7,048,193 | 1 | 2 | 1 | 1 |
| Triglycerides (TG) | 1449 | 7,049,658 | 0.897 | 1 | 1 | 0 |
| **Fetal growth (Collected at birth)** | | | | | | |
| Birth length | 1733 | 7,075,756 | 0.911 | 0 | 0 | 0 |
| Birth weight | 1746 | 7,080,318 | 0.89 | 0 | 0 | 0 |
| **Total** | | | | 4 | 3 | 1 |
