# Supplementary material for: Whole genome sequencing and analysis of 4,053 individuals in trios and mother-infant duos from the Born in Guangzhou Cohort Study
Source: Research Square preprint supplement (doi:10.21203/rs.3.rs-1732885/v1), 2022-06-10
Supplement: Supplementary file 24 [file e8bbd3179a2d999751895dff.xlsx]

## Sheet: Sheet1
Table S4. The dialect spoken by the individuals with more than 98%of the new southern Chinese genetic component
Sample ID	Dialect	Ratio of new ancetral componant
00114091135M21BFF2	Cantonese	0.9999
00116011214M22BFF2	Cantonese	0.995325
00115111016M23BFF2	Cantonese	0.994926
00115121123M17BFF2	Cantonese	0.99367
00115129002M27BFF2	Mandarin	0.99329
00114081178M17BFF2	Cantonese	0.990714
00114111269M16BFF2	Cantonese	0.989916
15100675BFF2	Unknown	0.98745
00115121419M24BFF2	Cantonese	0.986155
00113101128M26BFF2	Cantonese	0.984903
00114121359M26BFF2	Cantonese	0.984644
00115061363M25BFF2	Cantonese	0.983745
00114091125M25BFF2	Cantonese	0.983304
00114101206M24BFF2	Cantonese	0.983183
00114111146M18BFF2	Unknown	0.982552
00114031247M17BFF2	Cantonese	0.98242
00114111361M26BFF2	Cantonese	0.98189
00116011218M23BFF2	Cantonese	0.981866
14103740BFF2	Unknown	0.981845
00115071165M24BFF2	Cantonese	0.980237
