# Supplementary material for: Whole genome sequencing and analysis of 4,053 individuals in trios and mother-infant duos from the Born in Guangzhou Cohort Study
Source: Research Square preprint supplement (doi:10.21203/rs.3.rs-1732885/v1), 2022-06-10
Supplement: Supplementary file 25 [file f17ffcdb49a5b4d0fdbcd13e.xlsx]

## Sheet: Sheet1
Table S6. Intergenerational mendelian randomization analysis for maternal phenotypes and fetal growth measurements. This table is similar to Table 1, except having more fetal traits than Table 1. Related to Table 1.
Maternal traits		Birth weight (g, n=1,655)			Birth length (cm, n=1,654)			Gestational age (week, n=1,655)			HDL of cord blood (mmol/L, n=1,457)			LDL of cord blood (mmol/L, n=1,457)			TG of cord blood (mmol/L, n=1,457)
		Beta	SE	P value	Beta	SE	P value	Beta	SE	P value	Beta	SE	P value	Beta	SE	P value	Beta	SE	P value
Height (cm)	Maternal phenotype (Height)	14.6518	1.75494	1.43948e-16	0.045361	0.007575	2.59894e-09	0.016859	0.006533	0.009956	0.002728	0.001523	0.073404	-0.000677	0.001208	0.575319	-0.001224	0.000637	0.055015
	Maternal transmitted allele (h1)	28.5252	8.53241	0.000846948	0.045089	0.036566	0.217721	0.037786	0.031365	0.22849	0.004196	0.007308	0.565962	0.000994	0.005789	0.863655	0.000899	0.003062	0.769051
	Maternal nontransmitted allele (h2)	26.3413	8.5385	0.00206949	0.058199	0.036564	0.111646	0.030209	0.031382	0.335866	-0.002038	0.007331	0.781102	-0.00346	0.005806	0.551316	-0.003166	0.003071	0.302679
	Paternal transmitted allele (h3)	23.4687	8.54683	0.00610043	0.114458	0.036499	0.00174349	-0.032714	0.03139	0.297486	0.005625	0.00732	0.442396	-0.005549	0.005798	0.338696	0.000523	0.003068	0.864559
	Maternal effect	14.8242	7.39316	0.0451136	-0.009218	0.031719	0.771386	0.050807	0.027273	0.062649	-0.001754	0.006348	0.782383	0.00176	0.005028	0.726363	-0.001311	0.00266	0.622145
	Fetal genetic effect	11.6264	7.33192	0.112996	0.046496	0.031456	0.139571	-0.012417	0.027074	0.646566	0.005743	0.006287	0.361104	-0.00032	0.004979	0.948754	0.002312	0.002634	0.380133
BMI (kg/m^2)	Maternal phenotype (PREBMI)	29.296	3.07626	5.73689e-21	0.085315	0.013339	2.07459e-10	0.014927	0.011557	0.196684	-0.003862	0.002723	0.156336	-0.001275	0.00216	0.555148	-0.001385	0.00114	0.224725
	Maternal transmitted allele (h1)	11.6338	8.53958	0.173278	0.037355	0.036498	0.306232	-0.009266	0.031329	0.767456	0.012582	0.007285	0.084353	0.003745	0.005775	0.516748	-5.6e-05	0.003055	0.985379
	Maternal nontransmitted allele (h2)	13.0407	8.55478	0.127608	0.003336	0.036606	0.927393	0.033534	0.031369	0.285209	0.014453	0.00747	0.053203	0.012649	0.005915	0.032643	0.005767	0.00313	0.065646
	Paternal transmitted allele (h3)	7.41271	8.55533	0.386374	0.011839	0.036568	0.746154	-0.030372	0.03136	0.332934	0.011288	0.007296	0.12205	0.008312	0.00578	0.150619	-0.000997	0.00306	0.744603
	Maternal effect	8.44362	7.3941	0.253646	0.014045	0.031632	0.657087	0.027494	0.027125	0.310935	0.007535	0.006302	0.232016	0.003858	0.004995	0.440005	0.003296	0.002646	0.212957
	Fetal genetic effect	2.92288	7.46907	0.695604	0.023218	0.031955	0.467581	-0.037272	0.027394	0.173821	0.00475	0.006434	0.460484	-0.000386	0.0051	0.939751	-0.003503	0.002701	0.194848
BP (mmHg)	Maternal phenotype (BP)	-0.076076	0.314997	0.809187	-4.3e-05	0.001346	0.974365	-0.003778	0.001146	0.000997	6.5e-05	0.00027	0.808636	-1.2e-05	0.000214	0.955712	5e-06	0.000113	0.965876
	Maternal transmitted allele (h1)	-20.971	8.13862	0.010061	-0.076187	0.035613	0.0325594	-0.004007	0.031253	0.898	0.011943	0.007329	0.10343	-0.000463	0.005816	0.936588	0.002093	0.003071	0.495614
	Maternal nontransmitted allele (h2)	11.6628	8.13592	0.151906	0.052454	0.035598	0.140811	-0.021316	0.03119	0.494435	9.6e-05	0.007217	0.989351	-0.018825	0.0057	0.000982	-0.005083	0.003019	0.09249
	Paternal transmitted allele (h3)	0.376576	8.20697	0.963408	-0.056279	0.035859	0.116736	-0.001726	0.031452	0.956247	0.008778	0.007288	0.228642	0.00758	0.005777	0.189719	-0.001765	0.003053	0.563253
	Maternal effect	-4.48499	6.95405	0.519052	0.016519	0.030412	0.58709	-0.011599	0.026716	0.664233	0.001409	0.006196	0.820144	-0.01323	0.004898	0.006994	-0.000682	0.002595	0.792808
	Fetal genetic effect	-16.6199	7.15216	0.0202604	-0.095077	0.031268	0.00239747	0.007759	0.027478	0.777703	0.010941	0.006459	0.090504	0.013462	0.005106	0.008464	0.002802	0.002705	0.300558
FPG (mmol/L)	Maternal phenotype (OGTT 0H)	7.96396	3.11805	0.010734	0.004813	0.013351	0.718528	0.011676	0.011432	0.307242	0.004124	0.002661	0.121494	-0.000222	0.002111	0.916255	-0.000169	0.001115	0.879883
	Maternal transmitted allele (h1)	5.96202	8.17127	0.465719	0.026008	0.035734	0.466817	-0.014534	0.031316	0.642632	-0.006739	0.007262	0.353576	0.009823	0.005753	0.087958	0.004313	0.00304	0.156138
	Maternal nontransmitted allele (h2)	10.3234	8.1793	0.20708	-0.048323	0.035782	0.177045	0.055305	0.031301	0.077439	-0.003926	0.00737	0.594325	0.003575	0.005842	0.540716	0.001864	0.003086	0.545903
	Paternal transmitted allele (h3)	-14.3212	8.14834	0.0790083	-0.011957	0.035704	0.737745	-0.034111	0.031234	0.274938	-0.002087	0.007272	0.774196	-0.000152	0.005765	0.979006	-0.001532	0.003045	0.614881
	Maternal effect	15.748	7.15598	0.0278981	-0.002775	0.031316	0.929412	0.036958	0.027416	0.177832	-0.004262	0.006402	0.505708	0.006922	0.005072	0.172515	0.00397	0.002679	0.138595
	Fetal genetic effect	-8.99352	6.97433	0.197401	0.032179	0.030524	0.291947	-0.051217	0.026705	0.055297	-0.002185	0.006238	0.726134	0.002844	0.004942	0.564986	0.00043	0.002611	0.869301
TBA (umol/L)	Maternal phenotype (TBA)	3.52874	2.46786	0.152941	0.006217	0.010553	0.555821	0.002248	0.009041	0.803693	0.00303	0.002061	0.141628	0.002886	0.001633	0.077333	-0.00074	0.000863	0.391629
	Maternal transmitted allele (h1)	-6.89234	8.14988	0.397844	-0.061161	0.035629	0.0862458	-0.034604	0.031216	0.267799	0.010506	0.007316	0.151208	0.009274	0.005799	0.109973	-0.001271	0.003066	0.678451
	Maternal nontransmitted allele (h2)	-9.90014	8.18036	0.226364	-0.081268	0.035748	0.0231328	0.018272	0.031357	0.560171	-0.003008	0.007324	0.681389	0.00219	0.005807	0.706172	0.000821	0.003067	0.788883
	Paternal transmitted allele (h3)	7.22299	8.14094	0.375079	0.046054	0.035594	0.195892	-0.012229	0.031203	0.695182	0.006848	0.007233	0.343929	0.009533	0.00573	0.096395	-0.000698	0.00303	0.817741
	Maternal effect	-12.26	7.13714	0.0860278	-0.095887	0.031152	0.00211838	-0.001285	0.027362	0.962556	0.000142	0.006379	0.982306	0.000757	0.005054	0.880996	0.000147	0.002674	0.956201
	Fetal genetic effect	5.5454	7.20867	0.441846	0.036299	0.031456	0.248679	-0.033696	0.027624	0.222716	0.010308	0.00638	0.106391	0.008336	0.005054	0.099301	-0.001421	0.002674	0.595387
TG (mmol/L)	Maternal phenotype (TG)	0.367342	2.36852	0.876766	0.005464	0.010122	0.589401	-0.004555	0.008671	0.599424	-0.009891	0.010322	0.338105	-0.003402	0.008184	0.677667	0.001964	0.004323	0.649636
	Maternal transmitted allele (h1)	0.673669	8.17256	0.934314	0.048239	0.03572	0.177059	-0.016834	0.031314	0.590934	-0.003538	0.0073	0.628018	0.00798	0.005784	0.167924	0.00355	0.003056	0.245518
	Maternal nontransmitted allele (h2)	2.36367	8.17316	0.772466	-0.008028	0.035744	0.822311	-0.028431	0.031307	0.363948	-0.003155	0.007281	0.664801	0.007847	0.005769	0.17395	0.00179	0.003049	0.557256
	Paternal transmitted allele (h3)	8.67504	8.15582	0.287638	0.023481	0.03567	0.510448	-0.01976	0.031259	0.527381	0.010816	0.007327	0.140085	0.003688	0.005812	0.525838	8.5e-05	0.00307	0.977789
	Maternal effect	-3.29094	7.14632	0.645212	0.008714	0.031239	0.78033	-0.011138	0.027384	0.68426	-0.009353	0.006434	0.146254	0.005848	0.005099	0.251626	0.002686	0.002695	0.319082
	Fetal genetic effect	2.96679	6.99068	0.671335	0.038398	0.030568	0.209234	-0.002122	0.026789	0.936888	0.004632	0.006177	0.453458	0.001341	0.004895	0.784162	0.000807	0.002588	0.755287
TC (mmol/L)	Maternal phenotype (TC)	-1.29804	1.7767	0.465135	-0.001535	0.007595	0.839893	-0.003843	0.006505	0.554794	0.020164	0.00763	0.008311	0.013986	0.006051	0.020958	-0.000918	0.003202	0.774459
	Maternal transmitted allele (h1)	0.945917	8.19686	0.908142	0.034382	0.035849	0.337668	-0.07519	0.031303	0.016415	-0.008698	0.007354	0.237074	0.020789	0.005807	0.000355	0.004856	0.003078	0.11486
	Maternal nontransmitted allele (h2)	9.45898	8.17586	0.247466	0.041955	0.035751	0.240753	-0.014977	0.031341	0.632797	0.004604	0.007404	0.534141	0.00685	0.005868	0.243221	-4.6e-05	0.003101	0.988064
	Paternal transmitted allele (h3)	-12.4187	8.15111	0.127811	-0.02236	0.035664	0.530779	-0.016828	0.031254	0.590364	0.000124	0.007327	0.986523	0.011809	0.0058	0.041938	0.00678	0.003063	0.027005
	Maternal effect	10.8224	6.85916	0.114803	0.046194	0.030007	0.123886	-0.033558	0.026252	0.201332	-0.001777	0.006112	0.771314	0.006791	0.004818	0.158915	-0.001077	0.002554	0.673344
	Fetal genetic effect	-10.7384	7.25094	0.138809	-0.014613	0.031722	0.645096	-0.041535	0.027747	0.134597	-0.007315	0.006633	0.270271	0.014252	0.005228	0.006488	0.006312	0.002772	0.022924
The traits with P value less than 0.05 are in red.
